# Supplementary material for: Network analysis of human muscle adaptation to aging and contraction
Source: Aging (Albany NY). 2020 Jan 7;12(1):740–55. doi: 10.18632/aging.102653 (PMC6977671; doi:10.18632/aging.102653)
Supplement: Supplementary Table 1 [file aging-12-102653-s004..xlsx]

## Sheet: M1
HGNC gene symbol	Gene symbol annotation status	Corresponding approved gene symbol	Corresponding approved name	Location	Associated HGNC ID	Associated Entrez ID	Associated Ensembl ID
ABCF3	Approved symbol	ABCF3	ATP binding cassette subfamily F member 3	3q27.1	HGNC:72	55324	ENSG00000161204
AC007246.3	Unmatched
AC079586.1	Unmatched
ACAD10	Approved symbol	ACAD10	acyl-CoA dehydrogenase family member 10	12q24.12	HGNC:21597	80724	ENSG00000111271
ACHE	Approved symbol	ACHE	acetylcholinesterase (Cartwright blood group)	7q22.1	HGNC:108	43	ENSG00000087085
ACO1	Approved symbol	ACO1	aconitase 1	9p21.1	HGNC:117	48	ENSG00000122729
ACO2	Approved symbol	ACO2	aconitase 2	22q13.2	HGNC:118	50	ENSG00000100412
ACSL1	Approved symbol	ACSL1	acyl-CoA synthetase long chain family member 1	4q35.1	HGNC:3569	2180	ENSG00000151726
ACSM5	Approved symbol	ACSM5	acyl-CoA synthetase medium chain family member 5	16p12.3	HGNC:26060	54988	ENSG00000183549
ACTN2	Approved symbol	ACTN2	actinin alpha 2	1q43	HGNC:164	88	ENSG00000077522
ACTR1B	Approved symbol	ACTR1B	ARP1 actin related protein 1 homolog B	2q11.2	HGNC:168	10120	ENSG00000115073
ACTR8	Approved symbol	ACTR8	ARP8 actin related protein 8 homolog	3p21.1	HGNC:14672	93973	ENSG00000113812
ACVR2B-AS1	Approved symbol	ACVR2B-AS1	ACVR2B antisense RNA 1	3p22.2	HGNC:44161	100128640	ENSG00000229589
ADAM9	Approved symbol	ADAM9	ADAM metallopeptidase domain 9	8p11.22	HGNC:216	8754	ENSG00000168615
ADAMTSL2	Approved symbol	ADAMTSL2	ADAMTS like 2	9q34.2	HGNC:14631	9719	ENSG00000197859
ADCY1	Approved symbol	ADCY1	adenylate cyclase 1	7p12.3	HGNC:232	107	ENSG00000164742
ADCY9	Approved symbol	ADCY9	adenylate cyclase 9	16p13.3	HGNC:240	115	ENSG00000162104
ADI1	Approved symbol	ADI1	acireductone dioxygenase 1	2p25.3	HGNC:30576	55256	ENSG00000182551
ADPRHL1	Approved symbol	ADPRHL1	ADP-ribosylhydrolase like 1	13q34	HGNC:21303	113622	ENSG00000153531
AES	Approved symbol	AES	amino-terminal enhancer of split	19p13.3	HGNC:307	166	ENSG00000104964
AGPAT1	Approved symbol	AGPAT1	1-acylglycerol-3-phosphate O-acyltransferase 1	6p21.32	HGNC:324	10554	ENSG00000204310
AGPAT3	Approved symbol	AGPAT3	1-acylglycerol-3-phosphate O-acyltransferase 3	21q22.3	HGNC:326	56894	ENSG00000160216
AHCYL2	Approved symbol	AHCYL2	adenosylhomocysteinase like 2	7q32.1	HGNC:22204	23382	ENSG00000158467
AK3	Approved symbol	AK3	adenylate kinase 3	9p24.1	HGNC:17376	50808	ENSG00000147853
AKAP1	Approved symbol	AKAP1	A-kinase anchoring protein 1	17q22	HGNC:367	8165	ENSG00000121057
AKR7A2	Approved symbol	AKR7A2	aldo-keto reductase family 7 member A2	1p36.13	HGNC:389	8574	ENSG00000053371
AKR7A2P1	Approved symbol	AKR7A2P1	aldo-keto reductase family 7 member A2 pseudogene 1	1p13.2	HGNC:24062	246182	ENSG00000229020
AKT2	Approved symbol	AKT2	AKT serine/threonine kinase 2	19q13.2	HGNC:392	208	ENSG00000105221
ALAS1	Approved symbol	ALAS1	5'-aminolevulinate synthase 1	3p21.2	HGNC:396	211	ENSG00000023330
ALDH1L1	Approved symbol	ALDH1L1	aldehyde dehydrogenase 1 family member L1	3q21.3	HGNC:3978	10840	ENSG00000144908
ALDH4A1	Approved symbol	ALDH4A1	aldehyde dehydrogenase 4 family member A1	1p36.13	HGNC:406	8659	ENSG00000159423
ALKBH1	Approved symbol	ALKBH1	alkB homolog 1, histone H2A dioxygenase	14q24.3	HGNC:17911	8846	ENSG00000100601
ALKBH5	Approved symbol	ALKBH5	alkB homolog 5, RNA demethylase	17p11.2	HGNC:25996	54890	ENSG00000091542
AMACR	Approved symbol	AMACR	alpha-methylacyl-CoA racemase	5p13.2	HGNC:451	23600	ENSG00000242110
AMPD1	Approved symbol	AMPD1	adenosine monophosphate deaminase 1	1p13.2	HGNC:468	270	ENSG00000116748
ANAPC1	Approved symbol	ANAPC1	anaphase promoting complex subunit 1	2q13	HGNC:19988	64682	ENSG00000153107
ANAPC5	Approved symbol	ANAPC5	anaphase promoting complex subunit 5	12q24.31	HGNC:15713	51433	ENSG00000089053
ANK2	Approved symbol	ANK2	ankyrin 2	4q25-q26	HGNC:493	287	ENSG00000145362
AP4E1	Approved symbol	AP4E1	adaptor related protein complex 4 epsilon 1 subunit	15q21.2	HGNC:573	23431	ENSG00000081014
AP5S1	Approved symbol	AP5S1	adaptor related protein complex 5 sigma 1 subunit	20p13	HGNC:15875	55317	ENSG00000125843
APEH	Approved symbol	APEH	acylaminoacyl-peptide hydrolase	3p21.31	HGNC:586	327	ENSG00000164062
ARFGEF1	Approved symbol	ARFGEF1	ADP ribosylation factor guanine nucleotide exchange factor 1	8q13.2	HGNC:15772	10565	ENSG00000066777
ARG2	Approved symbol	ARG2	arginase 2	14q24.1	HGNC:664	384	ENSG00000081181
ARHGAP35	Approved symbol	ARHGAP35	Rho GTPase activating protein 35	19q13.32	HGNC:4591	2909	ENSG00000160007
ARHGAP44	Approved symbol	ARHGAP44	Rho GTPase activating protein 44	17p12	HGNC:29096	9912	ENSG00000006740
ARHGAP6	Approved symbol	ARHGAP6	Rho GTPase activating protein 6	Xp22.2	HGNC:676	395	ENSG00000047648
ARHGEF4	Approved symbol	ARHGEF4	Rho guanine nucleotide exchange factor 4	2q21.1	HGNC:684	50649	ENSG00000136002
ART5	Approved symbol	ART5	ADP-ribosyltransferase 5	11p15.4	HGNC:24049	116969	ENSG00000167311
ASB1	Approved symbol	ASB1	ankyrin repeat and SOCS box containing 1	2q37.3	HGNC:16011	51665	ENSG00000065802
ASB11	Approved symbol	ASB11	ankyrin repeat and SOCS box containing 11	Xp22.2	HGNC:17186	140456	ENSG00000165192
ASB16	Approved symbol	ASB16	ankyrin repeat and SOCS box containing 16	17q21.31	HGNC:19768	92591	ENSG00000161664
ASB8	Approved symbol	ASB8	ankyrin repeat and SOCS box containing 8	12q13.11	HGNC:17183	140461	ENSG00000177981
ASCC2	Approved symbol	ASCC2	activating signal cointegrator 1 complex subunit 2	22q12.2	HGNC:24103	84164	ENSG00000100325
ASH2L	Approved symbol	ASH2L	ASH2 like histone lysine methyltransferase complex subunit	8p11.23	HGNC:744	9070	ENSG00000129691
ATIC	Approved symbol	ATIC	5-aminoimidazole-4-carboxamide ribonucleotide formyltransferase/IMP cyclohydrolase	2q35	HGNC:794	471	ENSG00000138363
ATP1A2	Approved symbol	ATP1A2	ATPase Na+/K+ transporting subunit alpha 2	1q23.2	HGNC:800	477	ENSG00000018625
ATP1B1	Approved symbol	ATP1B1	ATPase Na+/K+ transporting subunit beta 1	1q24.2	HGNC:804	481	ENSG00000143153
ATP2B2	Approved symbol	ATP2B2	ATPase plasma membrane Ca2+ transporting 2	3p25.3	HGNC:815	491	ENSG00000157087
ATP6V1B2	Approved symbol	ATP6V1B2	ATPase H+ transporting V1 subunit B2	8p21.3	HGNC:854	526	ENSG00000147416
ATP6V1E2	Approved symbol	ATP6V1E2	ATPase H+ transporting V1 subunit E2	2p21	HGNC:18125	90423	ENSG00000250565
ATP8A1	Approved symbol	ATP8A1	ATPase phospholipid transporting 8A1	4p13	HGNC:13531	10396	ENSG00000124406
ATXN10	Approved symbol	ATXN10	ataxin 10	22q13.31	HGNC:10549	25814	ENSG00000130638
ATXN7L3B	Approved symbol	ATXN7L3B	ataxin 7 like 3B	12q21.1	HGNC:37931	552889	ENSG00000253719
BANP	Approved symbol	BANP	BTG3 associated nuclear protein	16q24.2	HGNC:13450	54971	ENSG00000172530
BBS2	Approved symbol	BBS2	Bardet-Biedl syndrome 2	16q13	HGNC:967	583	ENSG00000125124
BCAT2	Approved symbol	BCAT2	branched chain amino acid transaminase 2	19q13.33	HGNC:977	587	ENSG00000105552
BCKDHA	Approved symbol	BCKDHA	branched chain keto acid dehydrogenase E1, alpha polypeptide	19q13.2	HGNC:986	593	ENSG00000248098
BCKDK	Approved symbol	BCKDK	branched chain ketoacid dehydrogenase kinase	16p11.2	HGNC:16902	10295	ENSG00000103507
BCL2	Approved symbol	BCL2	BCL2, apoptosis regulator	18q21.33	HGNC:990	596	ENSG00000171791
BFAR	Approved symbol	BFAR	bifunctional apoptosis regulator	16p13.12	HGNC:17613	51283	ENSG00000103429
BICD2	Approved symbol	BICD2	BICD cargo adaptor 2	9q22.31	HGNC:17208	23299	ENSG00000185963
BMI1	Approved symbol	BMI1	BMI1 proto-oncogene, polycomb ring finger	10p12.2	HGNC:1066	648	ENSG00000168283
BMS1	Approved symbol	BMS1	BMS1, ribosome biogenesis factor	10q11.21	HGNC:23505	9790	ENSG00000165733
BOD1L2	Approved symbol	BOD1L2	biorientation of chromosomes in cell division 1 like 2	18q21.31	HGNC:28505	284257	ENSG00000228075
BRCC3	Approved symbol	BRCC3	BRCA1/BRCA2-containing complex subunit 3	Xq28	HGNC:24185	79184	ENSG00000185515
BRD7	Approved symbol	BRD7	bromodomain containing 7	16q12.1	HGNC:14310	29117	ENSG00000166164
BRE	Previous symbol	BABAM2	BRISC and BRCA1 A complex member 2	2p23.2	HGNC:1106	9577	ENSG00000158019
BRMS1L	Approved symbol	BRMS1L	breast cancer metastasis-suppressor 1 like	14q13.2	HGNC:20512	84312	ENSG00000100916
BTBD9	Approved symbol	BTBD9	BTB domain containing 9	6p21.2	HGNC:21228	114781	ENSG00000183826
BUD31	Approved symbol	BUD31	BUD31 homolog	7q22.1	HGNC:29629	8896	ENSG00000106245
C10orf12	Previous symbol	LCOR	ligand dependent nuclear receptor corepressor	10q24.1	HGNC:29503	84458	ENSG00000196233
C10orf76	Previous symbol	ARMH3	armadillo-like helical domain containing 3	10q24.32	HGNC:25788	79591	ENSG00000120029
C11orf95	Approved symbol	C11orf95	chromosome 11 open reading frame 95	11q13.1	HGNC:28449	65998	ENSG00000188070
C15orf38	Previous symbol	ARPIN	actin related protein 2/3 complex inhibitor	15q26.1	HGNC:28782	348110	ENSG00000242498
C15orf41	Approved symbol	C15orf41	chromosome 15 open reading frame 41	15q14	HGNC:26929	84529	ENSG00000186073
C16orf62	Previous symbol	VPS35L	VPS35 endosomal protein sorting factor like	16p12.3	HGNC:24641	57020	ENSG00000103544
C19orf12	Approved symbol	C19orf12	chromosome 19 open reading frame 12	19q12	HGNC:25443	83636	ENSG00000131943
C19orf54	Approved symbol	C19orf54	chromosome 19 open reading frame 54	19q13.2	HGNC:24758	284325	ENSG00000188493
C19orf68	Previous symbol	ZSWIM9	zinc finger SWIM-type containing 9	19q13.33	HGNC:34495	374920	ENSG00000185453
C20orf166	Previous symbol	MIR1-1HG	MIR1-1 host gene	20q13.33	HGNC:16159	128826	ENSG00000174407
C20orf194	Approved symbol	C20orf194	chromosome 20 open reading frame 194	20p13	HGNC:17721	25943	ENSG00000088854
C21orf59	Previous symbol	CFAP298	cilia and flagella associated protein 298	21q22.11	HGNC:1301	56683	ENSG00000159079
C5orf22	Approved symbol	C5orf22	chromosome 5 open reading frame 22	5p13.3	HGNC:25639	55322	ENSG00000082213
C6orf106	Approved symbol	C6orf106	chromosome 6 open reading frame 106	6p21.31	HGNC:21215	64771	ENSG00000196821
C9orf37	Previous symbol	ARRDC1-AS1	ARRDC1 antisense RNA 1	9q34.3	HGNC:23395	85026	ENSG00000203993
C9orf91	Previous symbol	TMEM268	transmembrane protein 268	9q32	HGNC:24513	203197	ENSG00000157693
CAB39	Approved symbol	CAB39	calcium binding protein 39	2q37.1	HGNC:20292	51719	ENSG00000135932
CACNA1S	Approved symbol	CACNA1S	calcium voltage-gated channel subunit alpha1 S	1q32.1	HGNC:1397	779	ENSG00000081248
CALM3	Approved symbol	CALM3	calmodulin 3	19q13.32	HGNC:1449	808	ENSG00000160014
CAMK2A	Approved symbol	CAMK2A	calcium/calmodulin dependent protein kinase II alpha	5q32	HGNC:1460	815	ENSG00000070808
CAMK2G	Approved symbol	CAMK2G	calcium/calmodulin dependent protein kinase II gamma	10q22.2	HGNC:1463	818	ENSG00000148660
CAPZB	Approved symbol	CAPZB	capping actin protein of muscle Z-line beta subunit	1p36.13	HGNC:1491	832	ENSG00000077549
CARKD	Previous symbol	NAXD	NAD(P)HX dehydratase	13q34	HGNC:25576	55739	ENSG00000213995
CARNS1	Approved symbol	CARNS1	carnosine synthase 1	11q13.2	HGNC:29268	57571	ENSG00000172508
CASP9	Approved symbol	CASP9	caspase 9	1p36.21	HGNC:1511	842	ENSG00000132906
CASQ2	Approved symbol	CASQ2	calsequestrin 2	1p13.1	HGNC:1513	845	ENSG00000118729
CBLL1	Approved symbol	CBLL1	Cbl proto-oncogene like 1	7q22.3	HGNC:21225	79872	ENSG00000105879
CBX1	Approved symbol	CBX1	chromobox 1	17q21.32	HGNC:1551	10951	ENSG00000108468
CBX7	Approved symbol	CBX7	chromobox 7	22q13.1	HGNC:1557	23492	ENSG00000100307
CCDC101	Previous symbol	SGF29	SAGA complex associated factor 29	16p11.2	HGNC:25156	112869	ENSG00000176476
CCDC106	Approved symbol	CCDC106	coiled-coil domain containing 106	19q13.42	HGNC:30181	29903	ENSG00000173581
CCDC22	Approved symbol	CCDC22	coiled-coil domain containing 22	Xp11.23	HGNC:28909	28952	ENSG00000101997
CCDC85C	Approved symbol	CCDC85C	coiled-coil domain containing 85C	14q32.2	HGNC:35459	317762	ENSG00000205476
CCDC94	Previous symbol	YJU2	YJU2 splicing factor homolog	19p13.3	HGNC:25518	55702	ENSG00000105248
CCHCR1	Approved symbol	CCHCR1	coiled-coil alpha-helical rod protein 1	6p21.33	HGNC:13930	54535	ENSG00000204536
CCNI	Approved symbol	CCNI	cyclin I	4q21.1	HGNC:1595	10983	ENSG00000118816
CD99L2	Approved symbol	CD99L2	CD99 molecule like 2	Xq28	HGNC:18237	83692	ENSG00000102181
CDC34	Approved symbol	CDC34	cell division cycle 34	19p13.3	HGNC:1734	997	ENSG00000099804
CDIP1	Approved symbol	CDIP1	cell death inducing p53 target 1	16p13.3	HGNC:13234	29965	ENSG00000089486
CDYL	Approved symbol	CDYL	chromodomain Y like	6p25.1	HGNC:1811	9425	ENSG00000153046
CEBPA-AS1	Approved symbol	CEBPA-AS1	CEBPA antisense RNA 1 (head to head)	19q13.11	HGNC:25710	80054	ENSG00000267296
CEP170P1	Approved symbol	CEP170P1	centrosomal protein 170 pseudogene 1	4q26	HGNC:28364	645455	ENSG00000154608
CHAD	Approved symbol	CHAD	chondroadherin	17q21.33	HGNC:1909	1101	ENSG00000136457
CHADL	Approved symbol	CHADL	chondroadherin like	22q13.2	HGNC:25165	150356	ENSG00000100399
CHDH	Approved symbol	CHDH	choline dehydrogenase	3p21.1	HGNC:24288	55349	ENSG00000016391
CHMP3	Approved symbol	CHMP3	charged multivesicular body protein 3	2p11.2	HGNC:29865	51652	ENSG00000115561
CHMP7	Approved symbol	CHMP7	charged multivesicular body protein 7	8p21.3	HGNC:28439	91782	ENSG00000147457
CIAO1	Approved symbol	CIAO1	cytosolic iron-sulfur assembly component 1	2q11.2	HGNC:14280	9391	ENSG00000144021
CLCN4	Approved symbol	CLCN4	chloride voltage-gated channel 4	Xp22.2	HGNC:2022	1183	ENSG00000073464
CLIP4	Approved symbol	CLIP4	CAP-Gly domain containing linker protein family member 4	2p23.2	HGNC:26108	79745	ENSG00000115295
CLPB	Approved symbol	CLPB	ClpB homolog, mitochondrial AAA ATPase chaperonin	11q13.4	HGNC:30664	81570	ENSG00000162129
CLPX	Approved symbol	CLPX	caseinolytic mitochondrial matrix peptidase chaperone subunit	15q22.31	HGNC:2088	10845	ENSG00000166855
CLUAP1	Approved symbol	CLUAP1	clusterin associated protein 1	16p13.3	HGNC:19009	23059	ENSG00000103351
CMPK1	Approved symbol	CMPK1	cytidine/uridine monophosphate kinase 1	1p33	HGNC:18170	51727	ENSG00000162368
CNNM4	Approved symbol	CNNM4	cyclin and CBS domain divalent metal cation transport mediator 4	2q11.2	HGNC:105	26504	ENSG00000158158
CNOT11	Approved symbol	CNOT11	CCR4-NOT transcription complex subunit 11	2q11.2	HGNC:25217	55571	ENSG00000158435
COG1	Approved symbol	COG1	component of oligomeric golgi complex 1	17q25.1	HGNC:6545	9382	ENSG00000166685
COPZ1	Approved symbol	COPZ1	coatomer protein complex subunit zeta 1	12q13.13	HGNC:2243	22818	ENSG00000111481
COX15	Approved symbol	COX15	COX15, cytochrome c oxidase assembly homolog	10q24.2	HGNC:2263	1355	ENSG00000014919
CPSF2	Approved symbol	CPSF2	cleavage and polyadenylation specific factor 2	14q32.12	HGNC:2325	53981	ENSG00000165934
CPT2	Approved symbol	CPT2	carnitine palmitoyltransferase 2	1p32.3	HGNC:2330	1376	ENSG00000157184
CROT	Approved symbol	CROT	carnitine O-octanoyltransferase	7q21.12	HGNC:2366	54677	ENSG00000005469
CRYL1	Approved symbol	CRYL1	crystallin lambda 1	13q12.11	HGNC:18246	51084	ENSG00000165475
CS	Approved symbol	CS	citrate synthase	12q13.3	HGNC:2422	1431	ENSG00000062485
CSNK2A1	Approved symbol	CSNK2A1	casein kinase 2 alpha 1	20p13	HGNC:2457	1457	ENSG00000101266
CSNK2A3	Approved symbol	CSNK2A3	casein kinase 2 alpha 3	11p15.4	HGNC:2458	283106	ENSG00000254598
CSRP2BP	Previous symbol	KAT14	lysine acetyltransferase 14	20p11.23	HGNC:15904	57325	ENSG00000149474
CTF1	Approved symbol	CTF1	cardiotrophin 1	16p11.2	HGNC:2499	1489	ENSG00000150281
CUL4A	Approved symbol	CUL4A	cullin 4A	13q34	HGNC:2554	8451	ENSG00000139842
CUTA	Approved symbol	CUTA	cutA divalent cation tolerance homolog	6p21.32	HGNC:21101	51596	ENSG00000112514
CXorf56	Approved symbol	CXorf56	chromosome X open reading frame 56	Xq24	HGNC:26239	63932	ENSG00000018610
CYB5RL	Approved symbol	CYB5RL	cytochrome b5 reductase like	1p32.3	HGNC:32220	606495	ENSG00000215883
D2HGDH	Approved symbol	D2HGDH	D-2-hydroxyglutarate dehydrogenase	2q37.3	HGNC:28358	728294	ENSG00000180902
DAB2IP	Approved symbol	DAB2IP	DAB2 interacting protein	9q33.2	HGNC:17294	153090	ENSG00000136848
DARS	Approved symbol	DARS	aspartyl-tRNA synthetase	2q21.3	HGNC:2678	1615	ENSG00000115866
DCAF12	Approved symbol	DCAF12	DDB1 and CUL4 associated factor 12	9p13.3	HGNC:19911	25853	ENSG00000198876
DCAF5	Approved symbol	DCAF5	DDB1 and CUL4 associated factor 5	14q24.1	HGNC:20224	8816	ENSG00000139990
DCAF8	Approved symbol	DCAF8	DDB1 and CUL4 associated factor 8	1q23.2	HGNC:24891	50717	ENSG00000132716
DCK	Approved symbol	DCK	deoxycytidine kinase	4q13.3	HGNC:2704	1633	ENSG00000156136
DDHD2	Approved symbol	DDHD2	DDHD domain containing 2	8p11.23	HGNC:29106	23259	ENSG00000085788
DDX19A	Approved symbol	DDX19A	DEAD-box helicase 19A	16q22.1	HGNC:25628	55308	ENSG00000168872
DENND4B	Approved symbol	DENND4B	DENN domain containing 4B	1q21.3	HGNC:29044	9909	ENSG00000198837
DENND5B	Approved symbol	DENND5B	DENN domain containing 5B	12p11.21	HGNC:28338	160518	ENSG00000170456
DENR	Approved symbol	DENR	density regulated re-initiation and release factor	12q24.31	HGNC:2769	8562	ENSG00000139726
DHCR7	Approved symbol	DHCR7	7-dehydrocholesterol reductase	11q13.4	HGNC:2860	1717	ENSG00000172893
DHODH	Approved symbol	DHODH	dihydroorotate dehydrogenase (quinone)	16q22.2	HGNC:2867	1723	ENSG00000102967
DHPS	Approved symbol	DHPS	deoxyhypusine synthase	19p13.13	HGNC:2869	1725	ENSG00000095059
DHRS11	Approved symbol	DHRS11	dehydrogenase/reductase 11	17q12	HGNC:28639	79154	ENSG00000278535
DIP2C	Approved symbol	DIP2C	disco interacting protein 2 homolog C	10p15.3	HGNC:29150	22982	ENSG00000151240
DIS3L	Approved symbol	DIS3L	DIS3 like exosome 3'-5' exoribonuclease	15q22.31	HGNC:28698	115752	ENSG00000166938
DKFZp451B082	Unmatched
DMGDH	Approved symbol	DMGDH	dimethylglycine dehydrogenase	5q14.1	HGNC:24475	29958	ENSG00000132837
DNAJA2	Approved symbol	DNAJA2	DnaJ heat shock protein family (Hsp40) member A2	16q11.2	HGNC:14884	10294	ENSG00000069345
DNAJB6	Approved symbol	DNAJB6	DnaJ heat shock protein family (Hsp40) member B6	7q36.3	HGNC:14888	10049	ENSG00000105993
DNAJC11	Approved symbol	DNAJC11	DnaJ heat shock protein family (Hsp40) member C11	1p36.31	HGNC:25570	55735	ENSG00000007923
DNAJC13	Approved symbol	DNAJC13	DnaJ heat shock protein family (Hsp40) member C13	3q22.1	HGNC:30343	23317	ENSG00000138246
DNAJC24	Approved symbol	DNAJC24	DnaJ heat shock protein family (Hsp40) member C24	11p13	HGNC:26979	120526	ENSG00000170946
DNAJC7	Approved symbol	DNAJC7	DnaJ heat shock protein family (Hsp40) member C7	17q21.2	HGNC:12392	7266	ENSG00000168259
DNASE2	Approved symbol	DNASE2	deoxyribonuclease 2, lysosomal	19p13.13	HGNC:2960	1777	ENSG00000105612
DNPEP	Approved symbol	DNPEP	aspartyl aminopeptidase	2q35	HGNC:2981	23549	ENSG00000123992
DPF3	Approved symbol	DPF3	double PHD fingers 3	14q24.2	HGNC:17427	8110	ENSG00000205683
DR1	Approved symbol	DR1	down-regulator of transcription 1	1p22.1	HGNC:3017	1810	ENSG00000117505
DUS2	Approved symbol	DUS2	dihydrouridine synthase 2	16q22.1	HGNC:26014	54920	ENSG00000167264
DUSP26	Approved symbol	DUSP26	dual specificity phosphatase 26	8p12	HGNC:28161	78986	ENSG00000133878
DUSP3	Approved symbol	DUSP3	dual specificity phosphatase 3	17q21.31	HGNC:3069	1845	ENSG00000108861
DYM	Approved symbol	DYM	dymeclin	18q21.1	HGNC:21317	54808	ENSG00000141627
DYNLL1-AS1	Previous symbol	NRAV	negative regulator of antiviral response (non-protein coding)	12q24.31	HGNC:48588	100506668	ENSG00000248008
DYNLL2	Approved symbol	DYNLL2	dynein light chain LC8-type 2	17q22	HGNC:24596	140735	ENSG00000264364
ECEL1	Approved symbol	ECEL1	endothelin converting enzyme like 1	2q37.1	HGNC:3147	9427	ENSG00000171551
ECHDC3	Approved symbol	ECHDC3	enoyl-CoA hydratase domain containing 3	10p14	HGNC:23489	79746	ENSG00000134463
EDC3	Approved symbol	EDC3	enhancer of mRNA decapping 3	15q24.1	HGNC:26114	80153	ENSG00000179151
EIF2AK1	Approved symbol	EIF2AK1	eukaryotic translation initiation factor 2 alpha kinase 1	7p22.1	HGNC:24921	27102	ENSG00000086232
EIF2B5	Approved symbol	EIF2B5	eukaryotic translation initiation factor 2B subunit epsilon	3q27.1	HGNC:3261	8893	ENSG00000145191
EIF4B	Approved symbol	EIF4B	eukaryotic translation initiation factor 4B	12q13.13	HGNC:3285	1975	ENSG00000063046
ELAC2	Approved symbol	ELAC2	elaC ribonuclease Z 2	17p12	HGNC:14198	60528	ENSG00000006744
ELL	Approved symbol	ELL	elongation factor for RNA polymerase II	19p13.11	HGNC:23114	8178	ENSG00000105656
ELP3	Approved symbol	ELP3	elongator acetyltransferase complex subunit 3	8p21.1	HGNC:20696	55140	ENSG00000134014
ELP4	Approved symbol	ELP4	elongator acetyltransferase complex subunit 4	11p13	HGNC:1171	26610	ENSG00000109911
EML1	Approved symbol	EML1	echinoderm microtubule associated protein like 1	14q32.2	HGNC:3330	2009	ENSG00000066629
ENAM	Approved symbol	ENAM	enamelin	4q13.3	HGNC:3344	10117	ENSG00000132464
ENTPD5	Approved symbol	ENTPD5	ectonucleoside triphosphate diphosphohydrolase 5	14q24.3	HGNC:3367	957	ENSG00000187097
EPHB1	Approved symbol	EPHB1	EPH receptor B1	3q22.2	HGNC:3392	2047	ENSG00000154928
EPM2A	Approved symbol	EPM2A	EPM2A, laforin glucan phosphatase	6q24.3	HGNC:3413	7957	ENSG00000112425
EPN2	Approved symbol	EPN2	epsin 2	17p11.2	HGNC:18639	22905	ENSG00000072134
EPRS	Approved symbol	EPRS	glutamyl-prolyl-tRNA synthetase	1q41	HGNC:3418	2058	ENSG00000136628
ERBB2IP	Previous symbol	ERBIN	erbb2 interacting protein	5q12.3	HGNC:15842	55914	ENSG00000112851
ERCC3	Approved symbol	ERCC3	ERCC excision repair 3, TFIIH core complex helicase subunit	2q14.3	HGNC:3435	2071	ENSG00000163161
ERCC6L2	Approved symbol	ERCC6L2	ERCC excision repair 6 like 2	9q22.32	HGNC:26922	375748	ENSG00000182150
ERGIC1	Approved symbol	ERGIC1	endoplasmic reticulum-golgi intermediate compartment 1	5q35.1	HGNC:29205	57222	ENSG00000113719
ERLEC1	Approved symbol	ERLEC1	endoplasmic reticulum lectin 1	2p16.2	HGNC:25222	27248	ENSG00000068912
ETV3	Approved symbol	ETV3	ETS variant 3	1q23.1	HGNC:3492	2117	ENSG00000117036
EXTL3	Approved symbol	EXTL3	exostosin like glycosyltransferase 3	8p21.1	HGNC:3518	2137	ENSG00000012232
FAF1	Approved symbol	FAF1	Fas associated factor 1	1p32.3	HGNC:3578	11124	ENSG00000185104
FAM149A	Approved symbol	FAM149A	family with sequence similarity 149 member A	4q35.1	HGNC:24527	25854	ENSG00000109794
FAM161B	Approved symbol	FAM161B	family with sequence similarity 161 member B	14q24.3	HGNC:19854	145483	ENSG00000156050
FAM192A	Approved symbol	FAM192A	family with sequence similarity 192 member A	16q13	HGNC:29856	80011	ENSG00000172775
FAM3A	Approved symbol	FAM3A	family with sequence similarity 3 member A	Xq28	HGNC:13749	60343	ENSG00000071889
FAM50B	Approved symbol	FAM50B	family with sequence similarity 50 member B	6p25.2	HGNC:18789	26240	ENSG00000145945
FAM78A	Approved symbol	FAM78A	family with sequence similarity 78 member A	9q34.13	HGNC:25465	286336	ENSG00000126882
FAM98B	Approved symbol	FAM98B	family with sequence similarity 98 member B	15q14	HGNC:26773	283742	ENSG00000171262
FANCM	Approved symbol	FANCM	Fanconi anemia complementation group M	14q21.2	HGNC:23168	57697	ENSG00000187790
FARP1	Approved symbol	FARP1	FERM, ARH/RhoGEF and pleckstrin domain protein 1	13q32.2	HGNC:3591	10160	ENSG00000152767
FARSB	Approved symbol	FARSB	phenylalanyl-tRNA synthetase beta subunit	2q36.1	HGNC:17800	10056	ENSG00000116120
FBRSL1	Approved symbol	FBRSL1	fibrosin like 1	12q24.33	HGNC:29308	57666	ENSG00000112787
FBXL18	Approved symbol	FBXL18	F-box and leucine rich repeat protein 18	7p22.1	HGNC:21874	80028	ENSG00000155034
FBXO21	Approved symbol	FBXO21	F-box protein 21	12q24.22	HGNC:13592	23014	ENSG00000135108
FBXO9	Approved symbol	FBXO9	F-box protein 9	6p12.1	HGNC:13588	26268	ENSG00000112146
FBXW4P1	Approved symbol	FBXW4P1	F-box and WD repeat domain containing 4 pseudogene 1	22q11.23	HGNC:13609	26226	ENSG00000230701
FEM1A	Approved symbol	FEM1A	fem-1 homolog A	19p13.3	HGNC:16934	55527	ENSG00000141965
FGD5-AS1	Approved symbol	FGD5-AS1	FGD5 antisense RNA 1	3p25.1	HGNC:40410	100505641	ENSG00000225733
FGF11	Approved symbol	FGF11	fibroblast growth factor 11	17p13.1	HGNC:3667	2256	ENSG00000161958
FGFRL1	Approved symbol	FGFRL1	fibroblast growth factor receptor like 1	4p16.3	HGNC:3693	53834	ENSG00000127418
FGGY	Approved symbol	FGGY	FGGY carbohydrate kinase domain containing	1p32.1	HGNC:25610	55277	ENSG00000172456
FHL1	Approved symbol	FHL1	four and a half LIM domains 1	Xq26.3	HGNC:3702	2273	ENSG00000022267
FHOD1	Approved symbol	FHOD1	formin homology 2 domain containing 1	16q22.1	HGNC:17905	29109	ENSG00000135723
FHOD3	Approved symbol	FHOD3	formin homology 2 domain containing 3	18q12.2	HGNC:26178	80206	ENSG00000134775
FITM2	Approved symbol	FITM2	fat storage inducing transmembrane protein 2	20q13.12	HGNC:16135	128486	ENSG00000197296
FKBP8	Approved symbol	FKBP8	FK506 binding protein 8	19p13.11	HGNC:3724	23770	ENSG00000105701
FKRP	Approved symbol	FKRP	fukutin related protein	19q13.32	HGNC:17997	79147	ENSG00000181027
FLJ10038	Synonyms	GABPB1-IT1	GABPB1 intronic transcript	15q21.2	HGNC:25469	55056
FLJ41941	Unmatched
FOXO4	Approved symbol	FOXO4	forkhead box O4	Xq13.1	HGNC:7139	4303	ENSG00000184481
FRAS1	Approved symbol	FRAS1	Fraser extracellular matrix complex subunit 1	4q21.21	HGNC:19185	80144	ENSG00000138759
FXR2	Approved symbol	FXR2	FMR1 autosomal homolog 2	17p13.1	HGNC:4024	9513	ENSG00000129245
FYCO1	Approved symbol	FYCO1	FYVE and coiled-coil domain containing 1	3p21.31	HGNC:14673	79443	ENSG00000163820
FZD5	Approved symbol	FZD5	frizzled class receptor 5	2q33.3	HGNC:4043	7855	ENSG00000163251
FZD7	Approved symbol	FZD7	frizzled class receptor 7	2q33.1	HGNC:4045	8324	ENSG00000155760
G0S2	Approved symbol	G0S2	G0/G1 switch 2	1q32.2	HGNC:30229	50486	ENSG00000123689
GAREML	Previous symbol	GAREM2	GRB2 associated regulator of MAPK1 subtype 2	2p23.3	HGNC:27172	150946	ENSG00000157833
GATSL2	Previous symbol	CASTOR2	cytosolic arginine sensor for mTORC1 subunit 2	7q11.23	HGNC:37073	729438	ENSG00000274070
GCFC2	Approved symbol	GCFC2	GC-rich sequence DNA-binding factor 2	2p12	HGNC:1317	6936	ENSG00000005436
GCNT2	Approved symbol	GCNT2	glucosaminyl (N-acetyl) transferase 2 (I blood group)	6p24.3-p24.2	HGNC:4204	2651	ENSG00000111846
GDE1	Approved symbol	GDE1	glycerophosphodiester phosphodiesterase 1	16p12.3	HGNC:29644	51573	ENSG00000006007
GEMIN5	Approved symbol	GEMIN5	gem nuclear organelle associated protein 5	5q33.2	HGNC:20043	25929	ENSG00000082516
GFPT1	Approved symbol	GFPT1	glutamine--fructose-6-phosphate transaminase 1	2p13.3	HGNC:4241	2673	ENSG00000198380
GGACT	Approved symbol	GGACT	gamma-glutamylamine cyclotransferase	13q32.3	HGNC:25100	87769	ENSG00000134864
GHR	Approved symbol	GHR	growth hormone receptor	5p13.1-p12	HGNC:4263	2690	ENSG00000112964
GID4	Approved symbol	GID4	GID complex subunit 4 homolog	17p11.2	HGNC:28453	79018	ENSG00000141034
GOLGA2	Approved symbol	GOLGA2	golgin A2	9q34.11	HGNC:4425	2801	ENSG00000167110
GPATCH3	Approved symbol	GPATCH3	G-patch domain containing 3	1p36.11	HGNC:25720	63906	ENSG00000198746
GPHN	Approved symbol	GPHN	gephyrin	14q23.3	HGNC:15465	10243	ENSG00000171723
GPI	Approved symbol	GPI	glucose-6-phosphate isomerase	19q13.11	HGNC:4458	2821	ENSG00000105220
GPKOW	Approved symbol	GPKOW	G-patch domain and KOW motifs	Xp11.23	HGNC:30677	27238	ENSG00000068394
GRB10	Approved symbol	GRB10	growth factor receptor bound protein 10	7p12.1	HGNC:4564	2887	ENSG00000106070
GSTM4	Approved symbol	GSTM4	glutathione S-transferase mu 4	1p13.3	HGNC:4636	2948	ENSG00000168765
GTF2IP1	Approved symbol	GTF2IP1	general transcription factor IIi pseudogene 1	7q11.23	HGNC:4660	2970	ENSG00000277053
GTF3C5	Approved symbol	GTF3C5	general transcription factor IIIC subunit 5	9q34.13	HGNC:4668	9328	ENSG00000148308
GUCD1	Approved symbol	GUCD1	guanylyl cyclase domain containing 1	22q11.23	HGNC:14237	83606	ENSG00000138867
GYS1	Approved symbol	GYS1	glycogen synthase 1	19q13.33	HGNC:4706	2997	ENSG00000104812
H2AFV	Approved symbol	H2AFV	H2A histone family member V	7p13	HGNC:20664	94239	ENSG00000105968
HADH	Approved symbol	HADH	hydroxyacyl-CoA dehydrogenase	4q25	HGNC:4799	3033	ENSG00000138796
HAGH	Approved symbol	HAGH	hydroxyacylglutathione hydrolase	16p13.3	HGNC:4805	3029	ENSG00000063854
HCN1	Approved symbol	HCN1	hyperpolarization activated cyclic nucleotide gated potassium channel 1	5p12	HGNC:4845	348980	ENSG00000164588
HDAC11	Approved symbol	HDAC11	histone deacetylase 11	3p25.1	HGNC:19086	79885	ENSG00000163517
HDAC4	Approved symbol	HDAC4	histone deacetylase 4	2q37.3	HGNC:14063	9759	ENSG00000068024
HDLBP	Approved symbol	HDLBP	high density lipoprotein binding protein	2q37.3	HGNC:4857	3069	ENSG00000115677
HEBP1	Approved symbol	HEBP1	heme binding protein 1	12p13.1	HGNC:17176	50865	ENSG00000013583
HERC1	Approved symbol	HERC1	HECT and RLD domain containing E3 ubiquitin protein ligase family member 1	15q22.31	HGNC:4867	8925	ENSG00000103657
HES1	Approved symbol	HES1	hes family bHLH transcription factor 1	3q29	HGNC:5192	3280	ENSG00000114315
HEXDC	Approved symbol	HEXDC	hexosaminidase D	17q25.3	HGNC:26307	284004	ENSG00000169660
HEY2	Approved symbol	HEY2	hes related family bHLH transcription factor with YRPW motif 2	6q22.31	HGNC:4881	23493	ENSG00000135547
HIST1H1C	Approved symbol	HIST1H1C	histone cluster 1 H1 family member c	6p22.2	HGNC:4716	3006	ENSG00000187837
HLCS	Approved symbol	HLCS	holocarboxylase synthetase	21q22.13	HGNC:4976	3141	ENSG00000159267
HNRNPUL2	Approved symbol	HNRNPUL2	heterogeneous nuclear ribonucleoprotein U like 2	11q12.3	HGNC:25451	221092	ENSG00000214753
HOXC-AS1	Approved symbol	HOXC-AS1	HOXC cluster antisense RNA 1	12q13.13	HGNC:43749	100874363	ENSG00000250451
HOXC4	Approved symbol	HOXC4	homeobox C4	12q13.13	HGNC:5126	3221	ENSG00000198353
HPN	Approved symbol	HPN	hepsin	19q13.11	HGNC:5155	3249	ENSG00000105707
HS6ST1	Approved symbol	HS6ST1	heparan sulfate 6-O-sulfotransferase 1	2q14.3	HGNC:5201	9394	ENSG00000136720
HTATSF1	Approved symbol	HTATSF1	HIV-1 Tat specific factor 1	Xq26.3	HGNC:5276	27336	ENSG00000102241
IBA57	Approved symbol	IBA57	IBA57, iron-sulfur cluster assembly	1q42.13	HGNC:27302	200205	ENSG00000181873
IFRD2	Approved symbol	IFRD2	interferon related developmental regulator 2	3p21.31	HGNC:5457	7866	ENSG00000214706
IFT81	Approved symbol	IFT81	intraflagellar transport 81	12q24.11	HGNC:14313	28981	ENSG00000122970
IGDCC4	Approved symbol	IGDCC4	immunoglobulin superfamily DCC subclass member 4	15q22.31	HGNC:13770	57722	ENSG00000103742
ING1	Approved symbol	ING1	inhibitor of growth family member 1	13q34	HGNC:6062	3621	ENSG00000153487
INTS7	Approved symbol	INTS7	integrator complex subunit 7	1q32.3	HGNC:24484	25896	ENSG00000143493
IP6K3	Approved symbol	IP6K3	inositol hexakisphosphate kinase 3	6p21.31	HGNC:17269	117283	ENSG00000161896
IPP	Approved symbol	IPP	intracisternal A particle-promoted polypeptide	1p34.1	HGNC:6108	3652	ENSG00000197429
IQSEC1	Approved symbol	IQSEC1	IQ motif and Sec7 domain 1	3p25.2	HGNC:29112	9922	ENSG00000144711
IRF2BP1	Approved symbol	IRF2BP1	interferon regulatory factor 2 binding protein 1	19q13.32	HGNC:21728	26145	ENSG00000170604
IRGQ	Approved symbol	IRGQ	immunity related GTPase Q	19q13.31	HGNC:24868	126298	ENSG00000167378
ITSN1	Approved symbol	ITSN1	intersectin 1	21q22.11	HGNC:6183	6453	ENSG00000205726
JPH2	Approved symbol	JPH2	junctophilin 2	20q13.12	HGNC:14202	57158	ENSG00000149596
JUP	Approved symbol	JUP	junction plakoglobin	17q21.2	HGNC:6207	3728	ENSG00000173801
KAL1	Previous symbol	ANOS1	anosmin 1	Xp22.31	HGNC:6211	3730	ENSG00000011201
KANSL3	Approved symbol	KANSL3	KAT8 regulatory NSL complex subunit 3	2q11.2	HGNC:25473	55683	ENSG00000114982
KBTBD12	Approved symbol	KBTBD12	kelch repeat and BTB domain containing 12	3q21.3	HGNC:25731	166348	ENSG00000187715
KBTBD4	Approved symbol	KBTBD4	kelch repeat and BTB domain containing 4	11p11.2	HGNC:23761	55709	ENSG00000123444
KCNA7	Approved symbol	KCNA7	potassium voltage-gated channel subfamily A member 7	19q13.33	HGNC:6226	3743	ENSG00000104848
KCND3	Approved symbol	KCND3	potassium voltage-gated channel subfamily D member 3	1p13.2	HGNC:6239	3752	ENSG00000171385
KCNN2	Approved symbol	KCNN2	potassium calcium-activated channel subfamily N member 2	5q22.3	HGNC:6291	3781	ENSG00000080709
KDM1A	Approved symbol	KDM1A	lysine demethylase 1A	1p36.12	HGNC:29079	23028	ENSG00000004487
KIAA0100	Approved symbol	KIAA0100	KIAA0100	17q11.2	HGNC:28960	9703	ENSG00000007202
KIAA0319L	Approved symbol	KIAA0319L	KIAA0319 like	1p34.3	HGNC:30071	79932	ENSG00000142687
KIAA0754	Approved symbol	KIAA0754	KIAA0754	1p34.2	HGNC:29111	643314
KIAA2013	Approved symbol	KIAA2013	KIAA2013	1p36.22	HGNC:28513	90231	ENSG00000116685
KIF3C	Approved symbol	KIF3C	kinesin family member 3C	2p23.3	HGNC:6321	3797	ENSG00000084731
KLHDC10	Approved symbol	KLHDC10	kelch domain containing 10	7q32.2	HGNC:22194	23008	ENSG00000128607
KLHL21	Approved symbol	KLHL21	kelch like family member 21	1p36.31	HGNC:29041	9903	ENSG00000162413
KPNA3	Approved symbol	KPNA3	karyopherin subunit alpha 3	13q14.2	HGNC:6396	3839	ENSG00000102753
KRBA1	Approved symbol	KRBA1	KRAB-A domain containing 1	7q36.1	HGNC:22228	84626	ENSG00000133619
LDB3	Approved symbol	LDB3	LIM domain binding 3	10q23.2	HGNC:15710	11155	ENSG00000122367
LINC00667	Approved symbol	LINC00667	long intergenic non-protein coding RNA 667	18p11.31	HGNC:27906	339290	ENSG00000263753
LINC00674	Approved symbol	LINC00674	long intergenic non-protein coding RNA 674	17q24.2	HGNC:44355	100499466	ENSG00000237854
LINC00938	Approved symbol	LINC00938	long intergenic non-protein coding RNA 938	12q12	HGNC:48630	400027
LINC00950	Approved symbol	LINC00950	long intergenic non-protein coding RNA 950	9p13.3	HGNC:28098	92973
LINC00957	Approved symbol	LINC00957	long intergenic non-protein coding RNA 957	7p13	HGNC:22332	255031	ENSG00000235314
LINC01184	Approved symbol	LINC01184	long intergenic non-protein coding RNA 1184	5q23.3	HGNC:49565	644873	ENSG00000245937
LMBRD2	Approved symbol	LMBRD2	LMBR1 domain containing 2	5p13.2	HGNC:25287	92255	ENSG00000164187
LMO4	Approved symbol	LMO4	LIM domain only 4	1p22.3	HGNC:6644	8543	ENSG00000143013
LMOD3	Approved symbol	LMOD3	leiomodin 3	3p14.1	HGNC:6649	56203	ENSG00000163380
LOC100093631	Unmatched
LOC100128164	Unmatched
LOC100131655	Unmatched
LOC100288911	Unmatched
LOC100506563	Unmatched
LOC100506746	Unmatched
LOC100507642	Unmatched
LOC100630918	Unmatched
LOC100996255	Unmatched
LOC100996723	Unmatched
LOC100996724	Unmatched
LOC100996741	Unmatched
LOC101060254	Unmatched
LOC101927181	Unmatched
LOC101927187	Unmatched
LOC101927300	Unmatched
LOC101928377	Unmatched
LOC101928657	Unmatched
LOC101929451	Unmatched
LOC101929479	Unmatched
LOC101929747	Unmatched
LOC102723521	Unmatched
LOC102723863	Unmatched
LOC102724173	Unmatched
LOC102724536	Unmatched
LOC102724645	Unmatched
LOC102724884	Unmatched
LOC283922	Unmatched
LOC494127	Unmatched
LOC643072	Unmatched
LOC653513	Unmatched
LOC728989	Unmatched
LOC80154	Unmatched
LONP1	Approved symbol	LONP1	lon peptidase 1, mitochondrial	19p13.2	HGNC:9479	9361	ENSG00000196365
LONP2	Approved symbol	LONP2	lon peptidase 2, peroxisomal	16q12.1	HGNC:20598	83752	ENSG00000102910
LRIG1	Approved symbol	LRIG1	leucine rich repeats and immunoglobulin like domains 1	3p14.1	HGNC:17360	26018	ENSG00000144749
LRPPRC	Approved symbol	LRPPRC	leucine rich pentatricopeptide repeat containing	2p21	HGNC:15714	10128	ENSG00000138095
LRRC20	Approved symbol	LRRC20	leucine rich repeat containing 20	10q22.1	HGNC:23421	55222	ENSG00000172731
LRRC25	Approved symbol	LRRC25	leucine rich repeat containing 25	19p13.11	HGNC:29806	126364	ENSG00000175489
LRRC42	Approved symbol	LRRC42	leucine rich repeat containing 42	1p32.3	HGNC:28792	115353	ENSG00000116212
LRRC47	Approved symbol	LRRC47	leucine rich repeat containing 47	1p36.32	HGNC:29207	57470	ENSG00000130764
LRRFIP1	Approved symbol	LRRFIP1	LRR binding FLII interacting protein 1	2q37.3	HGNC:6702	9208	ENSG00000124831
LRRN1	Approved symbol	LRRN1	leucine rich repeat neuronal 1	3p26.2	HGNC:20980	57633	ENSG00000175928
LSM14A	Approved symbol	LSM14A	LSM14A, mRNA processing body assembly factor	19q13.11	HGNC:24489	26065	ENSG00000257103
LSM14B	Approved symbol	LSM14B	LSM family member 14B	20q13.33	HGNC:15887	149986	ENSG00000149657
LSMEM2	Approved symbol	LSMEM2	leucine rich single-pass membrane protein 2	3p21.31	HGNC:26781	132228	ENSG00000179564
LUC7L2	Approved symbol	LUC7L2	LUC7 like 2, pre-mRNA splicing factor	7q34	HGNC:21608	51631	ENSG00000146963
LZTS3	Approved symbol	LZTS3	leucine zipper tumor suppressor family member 3	20p13	HGNC:30139	9762	ENSG00000088899
MAMLD1	Approved symbol	MAMLD1	mastermind like domain containing 1	Xq28	HGNC:2568	10046	ENSG00000013619
MAN2A2	Approved symbol	MAN2A2	mannosidase alpha class 2A member 2	15q25	HGNC:6825	4122	ENSG00000196547
MAP2K7	Approved symbol	MAP2K7	mitogen-activated protein kinase kinase 7	19p13.2	HGNC:6847	5609	ENSG00000076984
MAP3K3	Approved symbol	MAP3K3	mitogen-activated protein kinase kinase kinase 3	17q23.3	HGNC:6855	4215	ENSG00000198909
MAP3K4	Approved symbol	MAP3K4	mitogen-activated protein kinase kinase kinase 4	6q26	HGNC:6856	4216	ENSG00000085511
MAPK9	Approved symbol	MAPK9	mitogen-activated protein kinase 9	5q35.3	HGNC:6886	5601	ENSG00000050748
MARS	Approved symbol	MARS	methionyl-tRNA synthetase	12q13.3	HGNC:6898	4141	ENSG00000166986
MCCC1	Approved symbol	MCCC1	methylcrotonoyl-CoA carboxylase 1	3q27.1	HGNC:6936	56922	ENSG00000078070
MCM4	Approved symbol	MCM4	minichromosome maintenance complex component 4	8q11.21	HGNC:6947	4173	ENSG00000104738
MED13	Approved symbol	MED13	mediator complex subunit 13	17q23.2	HGNC:22474	9969	ENSG00000108510
MEF2D	Approved symbol	MEF2D	myocyte enhancer factor 2D	1q22	HGNC:6997	4209	ENSG00000116604
MEGF9	Approved symbol	MEGF9	multiple EGF like domains 9	9q33.2	HGNC:3234	1955	ENSG00000106780
MEMO1	Approved symbol	MEMO1	mediator of cell motility 1	2p22.3	HGNC:14014	51072	ENSG00000162959
MEPCE	Approved symbol	MEPCE	methylphosphate capping enzyme	7q22.1	HGNC:20247	56257	ENSG00000146834
METTL8	Approved symbol	METTL8	methyltransferase like 8	2q31.1	HGNC:25856	79828	ENSG00000123600
MGC16275	Unmatched
MID1IP1	Approved symbol	MID1IP1	MID1 interacting protein 1	Xp11.4	HGNC:20715	58526	ENSG00000165175
MID2	Approved symbol	MID2	midline 2	Xq22.3	HGNC:7096	11043	ENSG00000080561
MLH1	Approved symbol	MLH1	mutL homolog 1	3p22.2	HGNC:7127	4292	ENSG00000076242
MN1	Approved symbol	MN1	MN1 proto-oncogene, transcriptional regulator	22q12.1	HGNC:7180	4330	ENSG00000169184
MOAP1	Approved symbol	MOAP1	modulator of apoptosis 1	14q32.12	HGNC:16658	64112	ENSG00000165943
MOCS1	Approved symbol	MOCS1	molybdenum cofactor synthesis 1	6p21.2	HGNC:7190	4337	ENSG00000124615
MPI	Approved symbol	MPI	mannose phosphate isomerase	15q24.1	HGNC:7216	4351	ENSG00000178802
MRPL10	Approved symbol	MRPL10	mitochondrial ribosomal protein L10	17q21.32	HGNC:14055	124995	ENSG00000159111
MRPL38	Approved symbol	MRPL38	mitochondrial ribosomal protein L38	17q25.1	HGNC:14033	64978	ENSG00000204316
MRPS30	Approved symbol	MRPS30	mitochondrial ribosomal protein S30	5p12	HGNC:8769	10884	ENSG00000112996
MRPS6	Approved symbol	MRPS6	mitochondrial ribosomal protein S6	21q22.11	HGNC:14051	64968	ENSG00000243927
MTF1	Approved symbol	MTF1	metal regulatory transcription factor 1	1p34.3	HGNC:7428	4520	ENSG00000188786
MTFR1	Approved symbol	MTFR1	mitochondrial fission regulator 1	8q13.1	HGNC:29510	9650	ENSG00000066855
MTHFD1	Approved symbol	MTHFD1	methylenetetrahydrofolate dehydrogenase, cyclohydrolase and formyltetrahydrofolate synthetase 1	14q23.3	HGNC:7432	4522	ENSG00000100714
MTMR10	Approved symbol	MTMR10	myotubularin related protein 10	15q13.3	HGNC:25999	54893	ENSG00000166912
MTMR14	Approved symbol	MTMR14	myotubularin related protein 14	3p25.3	HGNC:26190	64419	ENSG00000163719
MTOR	Approved symbol	MTOR	mechanistic target of rapamycin kinase	1p36.22	HGNC:3942	2475	ENSG00000198793
MVB12B	Approved symbol	MVB12B	multivesicular body subunit 12B	9q33.3	HGNC:23368	89853	ENSG00000196814
MYH2	Approved symbol	MYH2	myosin heavy chain 2	17p13.1	HGNC:7572	4620	ENSG00000125414
MYOM1	Approved symbol	MYOM1	myomesin 1	18p11.31	HGNC:7613	8736	ENSG00000101605
MYOZ3	Approved symbol	MYOZ3	myozenin 3	5q33.1	HGNC:18565	91977	ENSG00000164591
NAA35	Approved symbol	NAA35	N(alpha)-acetyltransferase 35, NatC auxiliary subunit	9q21.33	HGNC:24340	60560	ENSG00000135040
NAALADL2	Approved symbol	NAALADL2	N-acetylated alpha-linked acidic dipeptidase like 2	3q26.31	HGNC:23219	254827	ENSG00000177694
NAP1L4	Approved symbol	NAP1L4	nucleosome assembly protein 1 like 4	11p15.4	HGNC:7640	4676	ENSG00000205531
NARS2	Approved symbol	NARS2	asparaginyl-tRNA synthetase 2, mitochondrial	11q14.1	HGNC:26274	79731	ENSG00000137513
NBEA	Approved symbol	NBEA	neurobeachin	13q13.3	HGNC:7648	26960	ENSG00000172915
NEIL2	Approved symbol	NEIL2	nei like DNA glycosylase 2	8p23.1	HGNC:18956	252969	ENSG00000154328
NEK10	Approved symbol	NEK10	NIMA related kinase 10	3p24.1	HGNC:18592	152110	ENSG00000163491
NEK9	Approved symbol	NEK9	NIMA related kinase 9	14q24.3	HGNC:18591	91754	ENSG00000119638
NFYB	Approved symbol	NFYB	nuclear transcription factor Y subunit beta	12q23.3	HGNC:7805	4801	ENSG00000120837
NFYC	Approved symbol	NFYC	nuclear transcription factor Y subunit gamma	1p34.2	HGNC:7806	4802	ENSG00000066136
NKAIN2	Approved symbol	NKAIN2	sodium/potassium transporting ATPase interacting 2	6q22.31	HGNC:16443	154215	ENSG00000188580
NKAP	Approved symbol	NKAP	NFKB activating protein	Xq24	HGNC:29873	79576	ENSG00000101882
NKIRAS2	Approved symbol	NKIRAS2	NFKB inhibitor interacting Ras like 2	17q21.2	HGNC:17898	28511	ENSG00000168256
NLN	Approved symbol	NLN	neurolysin	5q12.3	HGNC:16058	57486	ENSG00000123213
NLRX1	Approved symbol	NLRX1	NLR family member X1	11q23.3	HGNC:29890	79671	ENSG00000160703
NOL9	Approved symbol	NOL9	nucleolar protein 9	1p36.31	HGNC:26265	79707	ENSG00000162408
NOS1	Approved symbol	NOS1	nitric oxide synthase 1	12q24.22	HGNC:7872	4842	ENSG00000089250
NOSIP	Approved symbol	NOSIP	nitric oxide synthase interacting protein	19q13.33	HGNC:17946	51070	ENSG00000142546
NOTUM	Approved symbol	NOTUM	notum, palmitoleoyl-protein carboxylesterase	17q25.3	HGNC:27106	147111	ENSG00000185269
NQO2	Approved symbol	NQO2	N-ribosyldihydronicotinamide:quinone reductase 2	6p25.2	HGNC:7856	4835	ENSG00000124588
NR1D1	Approved symbol	NR1D1	nuclear receptor subfamily 1 group D member 1	17q21.1	HGNC:7962	9572	ENSG00000126368
NRL	Approved symbol	NRL	neural retina leucine zipper	14q11.2-q12	HGNC:8002	4901	ENSG00000129535
NSRP1	Approved symbol	NSRP1	nuclear speckle splicing regulatory protein 1	17q11.2	HGNC:25305	84081	ENSG00000126653
NSUN2	Approved symbol	NSUN2	NOP2/Sun RNA methyltransferase family member 2	5p15.31	HGNC:25994	54888	ENSG00000037474
NSUN5	Approved symbol	NSUN5	NOP2/Sun RNA methyltransferase family member 5	7q11.23	HGNC:16385	55695	ENSG00000130305
NT5C1A	Approved symbol	NT5C1A	5'-nucleotidase, cytosolic IA	1p34.2	HGNC:17819	84618	ENSG00000116981
NTF4	Approved symbol	NTF4	neurotrophin 4	19q13.3	HGNC:8024	4909	ENSG00000225950
NUB1	Approved symbol	NUB1	negative regulator of ubiquitin like proteins 1	7q36.1	HGNC:17623	51667	ENSG00000013374
NUCKS1	Approved symbol	NUCKS1	nuclear casein kinase and cyclin dependent kinase substrate 1	1q32.1	HGNC:29923	64710	ENSG00000069275
NUDCD3	Approved symbol	NUDCD3	NudC domain containing 3	7p13	HGNC:22208	23386	ENSG00000015676
NUDT16	Approved symbol	NUDT16	nudix hydrolase 16	3q22.1	HGNC:26442	131870	ENSG00000198585
NUDT3	Approved symbol	NUDT3	nudix hydrolase 3	6p21.31	HGNC:8050	11165	ENSG00000272325
NUTM2A	Approved symbol	NUTM2A	NUT family member 2A	10q23.2	HGNC:23438	728118	ENSG00000184923
NUTM2A-AS1	Approved symbol	NUTM2A-AS1	NUTM2A antisense RNA 1	10q23.2	HGNC:45161	728190	ENSG00000223482
NXPE3	Approved symbol	NXPE3	neurexophilin and PC-esterase domain family member 3	3q12.3	HGNC:28238	91775	ENSG00000144815
OAZ2	Approved symbol	OAZ2	ornithine decarboxylase antizyme 2	15q22.31	HGNC:8096	4947	ENSG00000180304
OCEL1	Approved symbol	OCEL1	occludin/ELL domain containing 1	19p13.11	HGNC:26221	79629	ENSG00000099330
OGDH	Approved symbol	OGDH	oxoglutarate dehydrogenase	7p13	HGNC:8124	4967	ENSG00000105953
OSBP2	Approved symbol	OSBP2	oxysterol binding protein 2	22q12.2	HGNC:8504	23762	ENSG00000184792
OSBPL11	Approved symbol	OSBPL11	oxysterol binding protein like 11	3q21.2	HGNC:16397	114885	ENSG00000144909
OSBPL1A	Approved symbol	OSBPL1A	oxysterol binding protein like 1A	18q11.2	HGNC:16398	114876	ENSG00000141447
OSGIN1	Approved symbol	OSGIN1	oxidative stress induced growth inhibitor 1	16q23.3	HGNC:30093	29948	ENSG00000140961
PAGR1	Approved symbol	PAGR1	PAXIP1 associated glutamate rich protein 1	16p11.2	HGNC:28707	79447	ENSG00000280789
PALLD	Approved symbol	PALLD	palladin, cytoskeletal associated protein	4q32.3	HGNC:17068	23022	ENSG00000129116
PAM	Approved symbol	PAM	peptidylglycine alpha-amidating monooxygenase	5q21.1	HGNC:8596	5066	ENSG00000145730
PANK1	Approved symbol	PANK1	pantothenate kinase 1	10q23.31	HGNC:8598	53354	ENSG00000152782
PANK4	Approved symbol	PANK4	pantothenate kinase 4	1p36.32	HGNC:19366	55229	ENSG00000157881
PARP1	Approved symbol	PARP1	poly(ADP-ribose) polymerase 1	1q42.12	HGNC:270	142	ENSG00000143799
PCBP1	Approved symbol	PCBP1	poly(rC) binding protein 1	2p13.3	HGNC:8647	5093	ENSG00000169564
PCBP2	Approved symbol	PCBP2	poly(rC) binding protein 2	12q13.13	HGNC:8648	5094	ENSG00000197111
PCYT1A	Approved symbol	PCYT1A	phosphate cytidylyltransferase 1, choline, alpha	3q29	HGNC:8754	5130	ENSG00000161217
PDE4DIP	Approved symbol	PDE4DIP	phosphodiesterase 4D interacting protein	1q21.2	HGNC:15580	9659	ENSG00000178104
PDK1	Approved symbol	PDK1	pyruvate dehydrogenase kinase 1	2q31.1	HGNC:8809	5163	ENSG00000152256
PDK2	Approved symbol	PDK2	pyruvate dehydrogenase kinase 2	17q21.33	HGNC:8810	5164	ENSG00000005882
PDPR	Approved symbol	PDPR	pyruvate dehydrogenase phosphatase regulatory subunit	16q22.1	HGNC:30264	55066	ENSG00000090857
PDSS2	Approved symbol	PDSS2	decaprenyl diphosphate synthase subunit 2	6q21	HGNC:23041	57107	ENSG00000164494
PDXDC1	Approved symbol	PDXDC1	pyridoxal dependent decarboxylase domain containing 1	16p13.11	HGNC:28995	23042	ENSG00000179889
PDXP	Approved symbol	PDXP	pyridoxal phosphatase	22q13.1	HGNC:30259	57026	ENSG00000241360
PDZD4	Approved symbol	PDZD4	PDZ domain containing 4	Xq28	HGNC:21167	57595	ENSG00000067840
PDZRN3	Approved symbol	PDZRN3	PDZ domain containing ring finger 3	3p13	HGNC:17704	23024	ENSG00000121440
PEBP4	Approved symbol	PEBP4	phosphatidylethanolamine binding protein 4	8p21.3	HGNC:28319	157310	ENSG00000134020
PERM1	Approved symbol	PERM1	PPARGC1 and ESRR induced regulator, muscle 1	1p36.33	HGNC:28208	84808	ENSG00000187642
PET117	Approved symbol	PET117	PET117 homolog	20p11.23	HGNC:40045	100303755	ENSG00000232838
PEX14	Approved symbol	PEX14	peroxisomal biogenesis factor 14	1p36.22	HGNC:8856	5195	ENSG00000142655
PFKFB4	Approved symbol	PFKFB4	6-phosphofructo-2-kinase/fructose-2,6-biphosphatase 4	3p21.31	HGNC:8875	5210	ENSG00000114268
PGBD5	Approved symbol	PGBD5	piggyBac transposable element derived 5	1q42.13	HGNC:19405	79605	ENSG00000177614
PGPEP1	Approved symbol	PGPEP1	pyroglutamyl-peptidase I	19p13.11	HGNC:13568	54858	ENSG00000130517
PHF20L1	Approved symbol	PHF20L1	PHD finger protein 20 like 1	8q24.22	HGNC:24280	51105	ENSG00000129292
PHKG1	Approved symbol	PHKG1	phosphorylase kinase catalytic subunit gamma 1	7p11.2	HGNC:8930	5260	ENSG00000164776
PIAS1	Approved symbol	PIAS1	protein inhibitor of activated STAT 1	15q23	HGNC:2752	8554	ENSG00000033800
PIGS	Approved symbol	PIGS	phosphatidylinositol glycan anchor biosynthesis class S	17q11.2	HGNC:14937	94005	ENSG00000087111
PINK1	Approved symbol	PINK1	PTEN induced putative kinase 1	1p36.12	HGNC:14581	65018	ENSG00000158828
PITHD1	Approved symbol	PITHD1	PITH domain containing 1	1p36.11	HGNC:25022	57095	ENSG00000057757
PITPNM1	Approved symbol	PITPNM1	phosphatidylinositol transfer protein membrane associated 1	11q13.2	HGNC:9003	9600	ENSG00000110697
PITRM1	Approved symbol	PITRM1	pitrilysin metallopeptidase 1	10p15.2	HGNC:17663	10531	ENSG00000107959
PKI55	Unmatched
PLCB1	Approved symbol	PLCB1	phospholipase C beta 1	20p12.3	HGNC:15917	23236	ENSG00000182621
PMPCA	Approved symbol	PMPCA	peptidase, mitochondrial processing alpha subunit	9q34.3	HGNC:18667	23203	ENSG00000165688
PNPLA2	Approved symbol	PNPLA2	patatin like phospholipase domain containing 2	11p15.5	HGNC:30802	57104	ENSG00000177666
POLDIP2	Approved symbol	POLDIP2	DNA polymerase delta interacting protein 2	17q11.2	HGNC:23781	26073	ENSG00000004142
POLE3	Approved symbol	POLE3	DNA polymerase epsilon 3, accessory subunit	9q32	HGNC:13546	54107	ENSG00000148229
POLR2C	Approved symbol	POLR2C	RNA polymerase II subunit C	16q21	HGNC:9189	5432	ENSG00000102978
POLR3B	Approved symbol	POLR3B	RNA polymerase III subunit B	12q23.3	HGNC:30348	55703	ENSG00000013503
POMZP3	Approved symbol	POMZP3	POM121 and ZP3 fusion	7q11.23	HGNC:9203	22932	ENSG00000146707
PPARA	Approved symbol	PPARA	peroxisome proliferator activated receptor alpha	22q13.31	HGNC:9232	5465	ENSG00000186951
PPP1R26	Approved symbol	PPP1R26	protein phosphatase 1 regulatory subunit 26	9q34.3	HGNC:29089	9858	ENSG00000196422
PPP1R3B	Approved symbol	PPP1R3B	protein phosphatase 1 regulatory subunit 3B	8p23.1	HGNC:14942	79660	ENSG00000173281
PPP2R5B	Approved symbol	PPP2R5B	protein phosphatase 2 regulatory subunit B'beta	11q13.1	HGNC:9310	5526	ENSG00000068971
PPP3CC	Approved symbol	PPP3CC	protein phosphatase 3 catalytic subunit gamma	8p21.3	HGNC:9316	5533	ENSG00000120910
PPP5C	Approved symbol	PPP5C	protein phosphatase 5 catalytic subunit	19q13.32	HGNC:9322	5536	ENSG00000011485
PRICKLE3	Approved symbol	PRICKLE3	prickle planar cell polarity protein 3	Xp11.23	HGNC:6645	4007	ENSG00000012211
PRKAB2	Approved symbol	PRKAB2	protein kinase AMP-activated non-catalytic subunit beta 2	1q21.1	HGNC:9379	5565	ENSG00000131791
PRKCA	Approved symbol	PRKCA	protein kinase C alpha	17q24.2	HGNC:9393	5578	ENSG00000154229
PRPH2	Approved symbol	PRPH2	peripherin 2	6p21.1	HGNC:9942	5961	ENSG00000112619
PSEN2	Approved symbol	PSEN2	presenilin 2	1q42.13	HGNC:9509	5664	ENSG00000143801
PSMD1	Approved symbol	PSMD1	proteasome 26S subunit, non-ATPase 1	2q37.1	HGNC:9554	5707	ENSG00000173692
PSME3	Approved symbol	PSME3	proteasome activator subunit 3	17q21.31	HGNC:9570	10197	ENSG00000131467
PSMG3-AS1	Approved symbol	PSMG3-AS1	PSMG3 antisense RNA 1 (head to head)	7p22.3	HGNC:22230	114796	ENSG00000230487
PTCHD3P1	Approved symbol	PTCHD3P1	patched domain containing 3 pseudogene 1	10p11.23	HGNC:44945	387647	ENSG00000274985
PTPRU	Approved symbol	PTPRU	protein tyrosine phosphatase, receptor type U	1p35.3	HGNC:9683	10076	ENSG00000060656
PWARSN	Approved symbol	PWARSN	Prader Willi/Angelman region RNA, SNRPN neighbor	15q11.2	HGNC:30001	347746
PYCR2	Approved symbol	PYCR2	pyrroline-5-carboxylate reductase 2	1q42.12	HGNC:30262	29920	ENSG00000143811
R3HDM1	Approved symbol	R3HDM1	R3H domain containing 1	2q21.3	HGNC:9757	23518	ENSG00000048991
RAB12	Approved symbol	RAB12	RAB12, member RAS oncogene family	18p11.22	HGNC:31332	201475	ENSG00000206418
RAB5B	Approved symbol	RAB5B	RAB5B, member RAS oncogene family	12q13	HGNC:9784	5869	ENSG00000111540
RAB6C	Approved symbol	RAB6C	RAB6C, member RAS oncogene family	2q21.1	HGNC:16525	84084	ENSG00000222014
RAMP1	Approved symbol	RAMP1	receptor activity modifying protein 1	2q37.3	HGNC:9843	10267	ENSG00000132329
RAPSN	Approved symbol	RAPSN	receptor associated protein of the synapse	11p11.2	HGNC:9863	5913	ENSG00000165917
RASA4	Approved symbol	RASA4	RAS p21 protein activator 4	7q22.1	HGNC:23181	10156	ENSG00000105808
RASA4B	Approved symbol	RASA4B	RAS p21 protein activator 4B	7q22.1	HGNC:35202	100271927	ENSG00000170667
RASA4CP	Approved symbol	RASA4CP	RAS p21 protein activator 4C, pseudogene	7p13	HGNC:44185	401331	ENSG00000228903
RBBP7	Approved symbol	RBBP7	RB binding protein 7, chromatin remodeling factor	Xp22.2	HGNC:9890	5931	ENSG00000102054
RBM27	Approved symbol	RBM27	RNA binding motif protein 27	5q32	HGNC:29243	54439	ENSG00000091009
RBM38	Approved symbol	RBM38	RNA binding motif protein 38	20q13.31	HGNC:15818	55544	ENSG00000132819
RCAN2	Approved symbol	RCAN2	regulator of calcineurin 2	6p12.3	HGNC:3041	10231	ENSG00000172348
REPIN1	Approved symbol	REPIN1	replication initiator 1	7q36.1	HGNC:17922	29803	ENSG00000214022
RGS9BP	Approved symbol	RGS9BP	regulator of G protein signaling 9 binding protein	19q13.11	HGNC:30304	388531	ENSG00000186326
RHOT1	Approved symbol	RHOT1	ras homolog family member T1	17q11.2	HGNC:21168	55288	ENSG00000126858
RITA1	Approved symbol	RITA1	RBPJ interacting and tubulin associated 1	12q24.13	HGNC:25925	84934	ENSG00000139405
RMDN1	Approved symbol	RMDN1	regulator of microtubule dynamics 1	8q21.3	HGNC:24285	51115	ENSG00000176623
RNF121	Approved symbol	RNF121	ring finger protein 121	11q13.4	HGNC:21070	55298	ENSG00000137522
RNF122	Approved symbol	RNF122	ring finger protein 122	8p12	HGNC:21147	79845	ENSG00000133874
RNF123	Approved symbol	RNF123	ring finger protein 123	3p21.31	HGNC:21148	63891	ENSG00000164068
RNF185	Approved symbol	RNF185	ring finger protein 185	22q12.2	HGNC:26783	91445	ENSG00000138942
RNF208	Approved symbol	RNF208	ring finger protein 208	9q34.3	HGNC:25420	727800	ENSG00000212864
RP11-1072A3.2	Unmatched
RP11-81N13.1	Unmatched
RPA1	Approved symbol	RPA1	replication protein A1	17p13.3	HGNC:10289	6117	ENSG00000132383
RPH3AL	Approved symbol	RPH3AL	rabphilin 3A like (without C2 domains)	17p13.3	HGNC:10296	9501	ENSG00000181031
RPS6KB2	Approved symbol	RPS6KB2	ribosomal protein S6 kinase B2	11q13.2	HGNC:10437	6199	ENSG00000175634
RPUSD3	Approved symbol	RPUSD3	RNA pseudouridylate synthase domain containing 3	3p25.3	HGNC:28437	285367	ENSG00000156990
RPUSD4	Approved symbol	RPUSD4	RNA pseudouridylate synthase domain containing 4	11q24.2	HGNC:25898	84881	ENSG00000165526
RRP9	Approved symbol	RRP9	ribosomal RNA processing 9, U3 small nucleolar RNA binding protein	3p21.2	HGNC:16829	9136	ENSG00000114767
RSAD1	Approved symbol	RSAD1	radical S-adenosyl methionine domain containing 1	17q21.33	HGNC:25634	55316	ENSG00000136444
RTCB	Approved symbol	RTCB	RNA 2',3'-cyclic phosphate and 5'-OH ligase	22q12.3	HGNC:26935	51493	ENSG00000100220
RXRA	Approved symbol	RXRA	retinoid X receptor alpha	9q34.2	HGNC:10477	6256	ENSG00000186350
RXRB	Approved symbol	RXRB	retinoid X receptor beta	6p21.32	HGNC:10478	6257	ENSG00000204231
RYR3	Approved symbol	RYR3	ryanodine receptor 3	15q13.3-q14	HGNC:10485	6263	ENSG00000198838
SAC3D1	Approved symbol	SAC3D1	SAC3 domain containing 1	11q13.1	HGNC:30179	29901	ENSG00000168061
SAMD14	Approved symbol	SAMD14	sterile alpha motif domain containing 14	17q21.33	HGNC:27312	201191	ENSG00000167100
SCAMP3	Approved symbol	SCAMP3	secretory carrier membrane protein 3	1q22	HGNC:10565	10067	ENSG00000116521
SCARB1	Approved symbol	SCARB1	scavenger receptor class B member 1	12q24.31	HGNC:1664	949	ENSG00000073060
SCO1	Approved symbol	SCO1	SCO1, cytochrome c oxidase assembly protein	17p13.1	HGNC:10603	6341	ENSG00000133028
SCRN3	Approved symbol	SCRN3	secernin 3	2q31.1	HGNC:30382	79634	ENSG00000144306
SDR39U1	Approved symbol	SDR39U1	short chain dehydrogenase/reductase family 39U member 1	14q12	HGNC:20275	56948	ENSG00000100445
SEC14L5	Approved symbol	SEC14L5	SEC14 like lipid binding 5	16p13.3	HGNC:29032	9717	ENSG00000103184
SEMA4D	Approved symbol	SEMA4D	semaphorin 4D	9q22.2	HGNC:10732	10507	ENSG00000187764
SEPHS1	Approved symbol	SEPHS1	selenophosphate synthetase 1	10p13	HGNC:19685	22929	ENSG00000086475
SGSM3	Approved symbol	SGSM3	small G protein signaling modulator 3	22q13.1	HGNC:25228	27352	ENSG00000100359
SH2B1	Approved symbol	SH2B1	SH2B adaptor protein 1	16p11.2	HGNC:30417	25970	ENSG00000178188
SH3BP5L	Approved symbol	SH3BP5L	SH3 binding domain protein 5 like	1q44	HGNC:29360	80851	ENSG00000175137
SLC16A7	Approved symbol	SLC16A7	solute carrier family 16 member 7	12q14.1	HGNC:10928	9194	ENSG00000118596
SLC25A20	Approved symbol	SLC25A20	solute carrier family 25 member 20	3p21.31	HGNC:1421	788	ENSG00000178537
SLC25A23	Approved symbol	SLC25A23	solute carrier family 25 member 23	19p13.3	HGNC:19375	79085	ENSG00000125648
SLC25A42	Approved symbol	SLC25A42	solute carrier family 25 member 42	19p13.11	HGNC:28380	284439	ENSG00000181035
SLC2A4	Approved symbol	SLC2A4	solute carrier family 2 member 4	17p13.1	HGNC:11009	6517	ENSG00000181856
SLC2A4RG	Approved symbol	SLC2A4RG	SLC2A4 regulator	20q13.33	HGNC:15930	56731	ENSG00000125520
SLC2A8	Approved symbol	SLC2A8	solute carrier family 2 member 8	9q33.3	HGNC:13812	29988	ENSG00000136856
SLC41A3	Approved symbol	SLC41A3	solute carrier family 41 member 3	3q21.2-q21.3	HGNC:31046	54946	ENSG00000114544
SLC4A1AP	Approved symbol	SLC4A1AP	solute carrier family 4 member 1 adaptor protein	2p23.3	HGNC:13813	22950	ENSG00000163798
SLC9A2	Approved symbol	SLC9A2	solute carrier family 9 member A2	2q12.1	HGNC:11072	6549	ENSG00000115616
SLC9A6	Approved symbol	SLC9A6	solute carrier family 9 member A6	Xq26.3	HGNC:11079	10479	ENSG00000198689
SLITRK4	Approved symbol	SLITRK4	SLIT and NTRK like family member 4	Xq27.3	HGNC:23502	139065	ENSG00000179542
SLU7	Approved symbol	SLU7	SLU7 homolog, splicing factor	5q33.3	HGNC:16939	10569	ENSG00000164609
SMARCA2	Approved symbol	SMARCA2	SWI/SNF related, matrix associated, actin dependent regulator of chromatin, subfamily a, member 2	9p24.3	HGNC:11098	6595	ENSG00000080503
SMOX	Approved symbol	SMOX	spermine oxidase	20p13	HGNC:15862	54498	ENSG00000088826
SMTNL1	Approved symbol	SMTNL1	smoothelin like 1	11q12.1	HGNC:32394	219537	ENSG00000214872
SMYD1	Approved symbol	SMYD1	SET and MYND domain containing 1	2p11.2	HGNC:20986	150572	ENSG00000115593
SMYD3	Approved symbol	SMYD3	SET and MYND domain containing 3	1q44	HGNC:15513	64754	ENSG00000185420
SMYD4	Approved symbol	SMYD4	SET and MYND domain containing 4	17p13.3	HGNC:21067	114826	ENSG00000186532
SNRPD3	Approved symbol	SNRPD3	small nuclear ribonucleoprotein D3 polypeptide	22q11.23	HGNC:11160	6634	ENSG00000100028
SNTA1	Approved symbol	SNTA1	syntrophin alpha 1	20q11.21	HGNC:11167	6640	ENSG00000101400
SNTB1	Approved symbol	SNTB1	syntrophin beta 1	8q24.12	HGNC:11168	6641	ENSG00000172164
SNX19	Approved symbol	SNX19	sorting nexin 19	11q24.3-q25	HGNC:21532	399979	ENSG00000120451
SOBP	Approved symbol	SOBP	sine oculis binding protein homolog	6q21	HGNC:29256	55084	ENSG00000112320
SOGA2	Previous symbol	MTCL1	microtubule crosslinking factor 1	18p11.22	HGNC:29121	23255	ENSG00000168502
SPAG16	Approved symbol	SPAG16	sperm associated antigen 16	2q34	HGNC:23225	79582	ENSG00000144451
SPAST	Approved symbol	SPAST	spastin	2p22.3	HGNC:11233	6683	ENSG00000021574
SPATA5L1	Approved symbol	SPATA5L1	spermatogenesis associated 5 like 1	15q21.1	HGNC:28762	79029	ENSG00000171763
SPEG	Approved symbol	SPEG	SPEG complex locus	2q35	HGNC:16901	10290	ENSG00000072195
SPG11	Approved symbol	SPG11	SPG11, spatacsin vesicle trafficking associated	15q21.1	HGNC:11226	80208	ENSG00000104133
SPG7	Approved symbol	SPG7	SPG7, paraplegin matrix AAA peptidase subunit	16q24.3	HGNC:11237	6687	ENSG00000197912
SPTBN4	Approved symbol	SPTBN4	spectrin beta, non-erythrocytic 4	19q13.13	HGNC:14896	57731	ENSG00000160460
SRA1	Approved symbol	SRA1	steroid receptor RNA activator 1	5q31.3	HGNC:11281	10011	ENSG00000213523
SRGAP3	Approved symbol	SRGAP3	SLIT-ROBO Rho GTPase activating protein 3	3p25.3	HGNC:19744	9901	ENSG00000196220
SRL	Approved symbol	SRL	sarcalumenin	16p13.3	HGNC:11295	6345	ENSG00000185739
SRP68	Approved symbol	SRP68	signal recognition particle 68	17q25.1	HGNC:11302	6730	ENSG00000167881
SRPK1	Approved symbol	SRPK1	SRSF protein kinase 1	6p21.31	HGNC:11305	6732	ENSG00000096063
SRPK3	Approved symbol	SRPK3	SRSF protein kinase 3	Xq28	HGNC:11402	26576	ENSG00000184343
SRPR	Previous symbol	SRPRA	SRP receptor alpha subunit	11q24.2	HGNC:11307	6734	ENSG00000182934
SSPN	Approved symbol	SSPN	sarcospan	12p11.2	HGNC:11322	8082	ENSG00000123096
ST3GAL1	Approved symbol	ST3GAL1	ST3 beta-galactoside alpha-2,3-sialyltransferase 1	8q24.22	HGNC:10862	6482	ENSG00000008513
ST3GAL2	Approved symbol	ST3GAL2	ST3 beta-galactoside alpha-2,3-sialyltransferase 2	16q22.1	HGNC:10863	6483	ENSG00000157350
ST6GALNAC6	Approved symbol	ST6GALNAC6	ST6 N-acetylgalactosaminide alpha-2,6-sialyltransferase 6	9q34.11	HGNC:23364	30815	ENSG00000160408
STARD7-AS1	Approved symbol	STARD7-AS1	STARD7 antisense RNA 1	2q11.2	HGNC:40827	285033	ENSG00000204685
STK33	Approved symbol	STK33	serine/threonine kinase 33	11p15.4	HGNC:14568	65975	ENSG00000130413
SUGT1P1	Approved symbol	SUGT1P1	SGT1 homolog, MIS12 kinetochore complex assembly cochaperone pseudogene 1	9p13.3	HGNC:19384	441394	ENSG00000226823
SUMO3	Approved symbol	SUMO3	small ubiquitin-like modifier 3	21q22.3	HGNC:11124	6612	ENSG00000184900
SYMPK	Approved symbol	SYMPK	symplekin	19q13.32	HGNC:22935	8189	ENSG00000125755
SYNPO	Approved symbol	SYNPO	synaptopodin	5q33.1	HGNC:30672	11346	ENSG00000171992
SYPL2	Approved symbol	SYPL2	synaptophysin like 2	1p13.3	HGNC:27638	284612	ENSG00000143028
SYS1	Approved symbol	SYS1	SYS1, golgi trafficking protein	20q13.12	HGNC:16162	90196	ENSG00000204070
TAB3	Approved symbol	TAB3	TGF-beta activated kinase 1 (MAP3K7) binding protein 3	Xp21.2	HGNC:30681	257397	ENSG00000157625
TANGO6	Approved symbol	TANGO6	transport and golgi organization 6 homolog	16q22.1	HGNC:25749	79613	ENSG00000103047
TARS2	Approved symbol	TARS2	threonyl-tRNA synthetase 2, mitochondrial	1q21.2	HGNC:30740	80222	ENSG00000143374
TBC1D14	Approved symbol	TBC1D14	TBC1 domain family member 14	4p16.1	HGNC:29246	57533	ENSG00000132405
TBCE	Approved symbol	TBCE	tubulin folding cofactor E	1q42.3	HGNC:11582	6905	ENSG00000116957
TBKBP1	Approved symbol	TBKBP1	TBK1 binding protein 1	17q21.32	HGNC:30140	9755	ENSG00000198933
TBX1	Approved symbol	TBX1	T-box 1	22q11.21	HGNC:11592	6899	ENSG00000184058
TCAIM	Approved symbol	TCAIM	T cell activation inhibitor, mitochondrial	3p21.31	HGNC:25241	285343	ENSG00000179152
TCEA3	Approved symbol	TCEA3	transcription elongation factor A3	1p36.12	HGNC:11615	6920	ENSG00000204219
TCEB3	Previous symbol	ELOA	elongin A	1p36.11	HGNC:11620	6924	ENSG00000011007
TENM3	Approved symbol	TENM3	teneurin transmembrane protein 3	4q34.3-q35.1	HGNC:29944	55714	ENSG00000218336
TEX2	Approved symbol	TEX2	testis expressed 2	17q23.3	HGNC:30884	55852	ENSG00000136478
TFCP2	Approved symbol	TFCP2	transcription factor CP2	12q13.12-q13.13	HGNC:11748	7024	ENSG00000135457
TFDP1	Approved symbol	TFDP1	transcription factor Dp-1	13q34	HGNC:11749	7027	ENSG00000198176
TFEB	Approved symbol	TFEB	transcription factor EB	6p21.1	HGNC:11753	7942	ENSG00000112561
TFG	Approved symbol	TFG	TRK-fused gene	3q12.2	HGNC:11758	10342	ENSG00000114354
THAP11	Approved symbol	THAP11	THAP domain containing 11	16q22.1	HGNC:23194	57215	ENSG00000168286
THOC3	Approved symbol	THOC3	THO complex 3	5q35.2	HGNC:19072	84321	ENSG00000051596
THRA	Approved symbol	THRA	thyroid hormone receptor alpha	17q21.1	HGNC:11796	7067	ENSG00000126351
THRB	Approved symbol	THRB	thyroid hormone receptor beta	3p24.2	HGNC:11799	7068	ENSG00000151090
THSD4	Approved symbol	THSD4	thrombospondin type 1 domain containing 4	15q23	HGNC:25835	79875	ENSG00000187720
TLE1	Approved symbol	TLE1	transducin like enhancer of split 1	9q21.32	HGNC:11837	7088	ENSG00000196781
TLE2	Approved symbol	TLE2	transducin like enhancer of split 2	19p13.3	HGNC:11838	7089	ENSG00000065717
TLK2	Approved symbol	TLK2	tousled like kinase 2	17q23	HGNC:11842	11011	ENSG00000146872
TLN2	Approved symbol	TLN2	talin 2	15q22.2	HGNC:15447	83660	ENSG00000171914
TM6SF1	Approved symbol	TM6SF1	transmembrane 6 superfamily member 1	15q25.2	HGNC:11860	53346	ENSG00000136404
TMCC2	Approved symbol	TMCC2	transmembrane and coiled-coil domain family 2	1q32.1	HGNC:24239	9911	ENSG00000133069
TMEM108	Approved symbol	TMEM108	transmembrane protein 108	3q22.1	HGNC:28451	66000	ENSG00000144868
TMEM170B	Approved symbol	TMEM170B	transmembrane protein 170B	6p24.2	HGNC:34244	100113407	ENSG00000205269
TMEM201	Approved symbol	TMEM201	transmembrane protein 201	1p36.22	HGNC:33719	199953	ENSG00000188807
TMEM245	Approved symbol	TMEM245	transmembrane protein 245	9q31.3	HGNC:1363	23731	ENSG00000106771
TMEM38A	Approved symbol	TMEM38A	transmembrane protein 38A	19p13.11	HGNC:28462	79041	ENSG00000072954
TMEM64	Approved symbol	TMEM64	transmembrane protein 64	8q21.3	HGNC:25441	169200	ENSG00000180694
TMEM65	Approved symbol	TMEM65	transmembrane protein 65	8q24.13	HGNC:25203	157378	ENSG00000164983
TMEM8B	Approved symbol	TMEM8B	transmembrane protein 8B	9p13.3	HGNC:21427	51754	ENSG00000137103
TMLHE	Approved symbol	TMLHE	trimethyllysine hydroxylase, epsilon	Xq28	HGNC:18308	55217	ENSG00000185973
TNPO3	Approved symbol	TNPO3	transportin 3	7q32.1	HGNC:17103	23534	ENSG00000064419
TOMM34	Approved symbol	TOMM34	translocase of outer mitochondrial membrane 34	20q13.12	HGNC:15746	10953	ENSG00000025772
TOX4	Approved symbol	TOX4	TOX high mobility group box family member 4	14q11.2	HGNC:20161	9878	ENSG00000092203
TPRG1L	Approved symbol	TPRG1L	tumor protein p63 regulated 1 like	1p36.32	HGNC:27007	127262	ENSG00000158109
TRAK1	Approved symbol	TRAK1	trafficking kinesin protein 1	3p22.1	HGNC:29947	22906	ENSG00000182606
TRAP1	Approved symbol	TRAP1	TNF receptor associated protein 1	16p13.3	HGNC:16264	10131	ENSG00000126602
TRAPPC8	Approved symbol	TRAPPC8	trafficking protein particle complex 8	18q12.1	HGNC:29169	22878	ENSG00000153339
TRIM3	Approved symbol	TRIM3	tripartite motif containing 3	11p15.4	HGNC:10064	10612	ENSG00000110171
TRIM37	Approved symbol	TRIM37	tripartite motif containing 37	17q22	HGNC:7523	4591	ENSG00000108395
TRIM69	Approved symbol	TRIM69	tripartite motif containing 69	15q15-q21	HGNC:17857	140691	ENSG00000185880
TRMT2B	Approved symbol	TRMT2B	tRNA methyltransferase 2 homolog B	Xq22.1	HGNC:25748	79979	ENSG00000188917
TRNH	Synonyms	MT-TH	mitochondrially encoded tRNA histidine	mitochondria	HGNC:7487	4564	ENSG00000210176
TRNL2	Synonyms	MT-TL2	mitochondrially encoded tRNA leucine 2 (CUN)	mitochondria	HGNC:7491	4568	ENSG00000210191
TRNT	Synonyms	MT-TT	mitochondrially encoded tRNA threonine	mitochondria	HGNC:7499	4576	ENSG00000210195
TSC22D1	Approved symbol	TSC22D1	TSC22 domain family member 1	13q14.11	HGNC:16826	8848	ENSG00000102804
TSPYL1	Approved symbol	TSPYL1	TSPY like 1	6q22.1	HGNC:12382	7259	ENSG00000189241
TSPYL5	Approved symbol	TSPYL5	TSPY like 5	8q22.1	HGNC:29367	85453	ENSG00000180543
TSR2	Approved symbol	TSR2	TSR2, ribosome maturation factor	Xp11.22	HGNC:25455	90121	ENSG00000158526
TTC38	Approved symbol	TTC38	tetratricopeptide repeat domain 38	22q13.31	HGNC:26082	55020	ENSG00000075234
TTC7B	Approved symbol	TTC7B	tetratricopeptide repeat domain 7B	14q32.11	HGNC:19858	145567	ENSG00000165914
TTLL11	Approved symbol	TTLL11	tubulin tyrosine ligase like 11	9q33.2	HGNC:18113	158135	ENSG00000175764
TUBGCP4	Approved symbol	TUBGCP4	tubulin gamma complex associated protein 4	15q15.3	HGNC:16691	27229	ENSG00000137822
TUFM	Approved symbol	TUFM	Tu translation elongation factor, mitochondrial	16p11.2	HGNC:12420	7284	ENSG00000178952
TUSC2	Approved symbol	TUSC2	tumor suppressor 2, mitochondrial calcium regulator	3p21.31	HGNC:17034	11334	ENSG00000114383
TXLNB	Approved symbol	TXLNB	taxilin beta	6q24.1	HGNC:21617	167838	ENSG00000164440
TXNL4B	Approved symbol	TXNL4B	thioredoxin like 4B	16q22.2	HGNC:26041	54957	ENSG00000140830
TXNRD2	Approved symbol	TXNRD2	thioredoxin reductase 2	22q11.21	HGNC:18155	10587	ENSG00000184470
TXNRD3	Approved symbol	TXNRD3	thioredoxin reductase 3	3q21.3	HGNC:20667	114112	ENSG00000197763
UBE2G2	Approved symbol	UBE2G2	ubiquitin conjugating enzyme E2 G2	21q22.3	HGNC:12483	7327	ENSG00000184787
UBE2H	Approved symbol	UBE2H	ubiquitin conjugating enzyme E2 H	7q32.2	HGNC:12484	7328	ENSG00000186591
UBE2L3	Approved symbol	UBE2L3	ubiquitin conjugating enzyme E2 L3	22q11.21	HGNC:12488	7332	ENSG00000185651
UBE3B	Approved symbol	UBE3B	ubiquitin protein ligase E3B	12q24.11	HGNC:13478	89910	ENSG00000151148
UBE3C	Approved symbol	UBE3C	ubiquitin protein ligase E3C	7q36.3	HGNC:16803	9690	ENSG00000009335
UBL7	Approved symbol	UBL7	ubiquitin like 7	15q24.1	HGNC:28221	84993	ENSG00000138629
UNC45B	Approved symbol	UNC45B	unc-45 myosin chaperone B	17q12	HGNC:14304	146862	ENSG00000141161
UPK3A	Approved symbol	UPK3A	uroplakin 3A	22q13.31	HGNC:12580	7380	ENSG00000100373
USP13	Approved symbol	USP13	ubiquitin specific peptidase 13	3q26.33	HGNC:12611	8975	ENSG00000058056
USP32	Approved symbol	USP32	ubiquitin specific peptidase 32	17q23.3	HGNC:19143	84669	ENSG00000170832
USP46	Approved symbol	USP46	ubiquitin specific peptidase 46	4q12	HGNC:20075	64854	ENSG00000109189
VAPB	Approved symbol	VAPB	VAMP associated protein B and C	20q13.32	HGNC:12649	9217	ENSG00000124164
VTI1A	Approved symbol	VTI1A	vesicle transport through interaction with t-SNAREs 1A	10q25.2	HGNC:17792	143187	ENSG00000151532
WAC-AS1	Approved symbol	WAC-AS1	WAC antisense RNA 1 (head to head)	10p12.1	HGNC:27347	220906	ENSG00000254635
WASF3	Approved symbol	WASF3	WAS protein family member 3	13q12.13	HGNC:12734	10810	ENSG00000132970
WDPCP	Approved symbol	WDPCP	WD repeat containing planar cell polarity effector	2p15	HGNC:28027	51057	ENSG00000143951
WDR37	Approved symbol	WDR37	WD repeat domain 37	10p15.3	HGNC:31406	22884	ENSG00000047056
WDR5B	Approved symbol	WDR5B	WD repeat domain 5B	3q21.1	HGNC:17826	54554	ENSG00000196981
WDR62	Approved symbol	WDR62	WD repeat domain 62	19q13.12	HGNC:24502	284403	ENSG00000075702
WDTC1	Approved symbol	WDTC1	WD and tetratricopeptide repeats 1	1p36.11	HGNC:29175	23038	ENSG00000142784
WFIKKN2	Approved symbol	WFIKKN2	WAP, follistatin/kazal, immunoglobulin, kunitz and netrin domain containing 2	17q21.33	HGNC:30916	124857	ENSG00000173714
WNT11	Approved symbol	WNT11	Wnt family member 11	11q13.5	HGNC:12776	7481	ENSG00000085741
WRNIP1	Approved symbol	WRNIP1	Werner helicase interacting protein 1	6p25.2	HGNC:20876	56897	ENSG00000124535
XPO7	Approved symbol	XPO7	exportin 7	8p21.3	HGNC:14108	23039	ENSG00000130227
XRCC6	Approved symbol	XRCC6	X-ray repair cross complementing 6	22q13.2	HGNC:4055	2547	ENSG00000196419
YWHAE	Approved symbol	YWHAE	tyrosine 3-monooxygenase/tryptophan 5-monooxygenase activation protein epsilon	17p13.3	HGNC:12851	7531	ENSG00000108953
YWHAEP1	Approved symbol	YWHAEP1	tyrosine 3-monooxygenase/tryptophan 5-monooxygenase activation protein epsilon pseudogene 1	7q11.21	HGNC:49442	649395	ENSG00000232727
ZBED1	Approved symbol	ZBED1	zinc finger BED-type containing 1	Xp22.33 and Yp11	HGNC:447	9189	ENSG00000214717
ZBTB16	Approved symbol	ZBTB16	zinc finger and BTB domain containing 16	11q23.2	HGNC:12930	7704	ENSG00000109906
ZBTB18	Approved symbol	ZBTB18	zinc finger and BTB domain containing 18	1q44	HGNC:13030	10472	ENSG00000179456
ZCCHC24	Approved symbol	ZCCHC24	zinc finger CCHC-type containing 24	10q22.3	HGNC:26911	219654	ENSG00000165424
ZDHHC3	Approved symbol	ZDHHC3	zinc finger DHHC-type containing 3	3p21.31	HGNC:18470	51304	ENSG00000163812
ZDHHC7	Approved symbol	ZDHHC7	zinc finger DHHC-type containing 7	16q24.1	HGNC:18459	55625	ENSG00000153786
ZFAND3	Approved symbol	ZFAND3	zinc finger AN1-type containing 3	6p21.2	HGNC:18019	60685	ENSG00000156639
ZFP91	Approved symbol	ZFP91	ZFP91 zinc finger protein	11q12.1	HGNC:14983	80829	ENSG00000186660
ZFYVE28	Approved symbol	ZFYVE28	zinc finger FYVE-type containing 28	4p16.3	HGNC:29334	57732	ENSG00000159733
ZHX3	Approved symbol	ZHX3	zinc fingers and homeoboxes 3	20q12	HGNC:15935	23051	ENSG00000174306
ZMYND12	Approved symbol	ZMYND12	zinc finger MYND-type containing 12	1p34.2	HGNC:21192	84217	ENSG00000066185
ZNF205-AS1	Approved symbol	ZNF205-AS1	ZNF205 antisense RNA 1	16p13.3	HGNC:28586	81854
ZNF41	Approved symbol	ZNF41	zinc finger protein 41	Xp11.3	HGNC:13107	7592	ENSG00000147124
ZNF423	Approved symbol	ZNF423	zinc finger protein 423	16q12.1	HGNC:16762	23090	ENSG00000102935
ZNF469	Approved symbol	ZNF469	zinc finger protein 469	16q24.2	HGNC:23216	84627	ENSG00000225614
ZNF526	Approved symbol	ZNF526	zinc finger protein 526	19q13.31	HGNC:29415	116115	ENSG00000167625
ZNF592	Approved symbol	ZNF592	zinc finger protein 592	15q25.2	HGNC:28986	9640	ENSG00000166716
ZNF641	Approved symbol	ZNF641	zinc finger protein 641	12q13.11	HGNC:31834	121274	ENSG00000167528
ZNF664	Approved symbol	ZNF664	zinc finger protein 664	12q24.31	HGNC:25406	144348	ENSG00000179195
ZNF672	Approved symbol	ZNF672	zinc finger protein 672	1q44	HGNC:26179	79894	ENSG00000171161
ZNF710	Approved symbol	ZNF710	zinc finger protein 710	15q26.1	HGNC:25352	374655	ENSG00000140548
ZNF768	Approved symbol	ZNF768	zinc finger protein 768	16p11.2	HGNC:26273	79724	ENSG00000169957
ZNF784	Approved symbol	ZNF784	zinc finger protein 784	19q13.42	HGNC:33111	147808	ENSG00000179922
ZNF821	Approved symbol	ZNF821	zinc finger protein 821	16q22.2	HGNC:28043	55565	ENSG00000102984
ZNF839	Approved symbol	ZNF839	zinc finger protein 839	14q32.31	HGNC:20345	55778	ENSG00000022976
ZNF853	Approved symbol	ZNF853	zinc finger protein 853	7p22.1	HGNC:21767	54753	ENSG00000236609
ZSCAN21	Approved symbol	ZSCAN21	zinc finger and SCAN domain containing 21	7q22.1	HGNC:13104	7589	ENSG00000166529
ZSCAN31	Approved symbol	ZSCAN31	zinc finger and SCAN domain containing 31	6p22.1	HGNC:14097	64288	ENSG00000235109

## Sheet: M2
HGNC gene symbol	Gene symbol annotation status	Corresponding approved gene symbol	Corresponding approved name	Location	Associated HGNC ID	Associated Entrez ID	Associated Ensembl ID
APOL1	Approved symbol	APOL1	apolipoprotein L1	22q12.3	HGNC:618	8542	ENSG00000100342
ATF5	Approved symbol	ATF5	activating transcription factor 5	19q13.33	HGNC:790	22809	ENSG00000169136
B2M	Approved symbol	B2M	beta-2-microglobulin	15q21.1	HGNC:914	567	ENSG00000166710
BATF2	Approved symbol	BATF2	basic leucine zipper ATF-like transcription factor 2	11q13.1	HGNC:25163	116071	ENSG00000168062
BTN3A1	Approved symbol	BTN3A1	butyrophilin subfamily 3 member A1	6p22.2	HGNC:1138	11119	ENSG00000026950
BTN3A2	Approved symbol	BTN3A2	butyrophilin subfamily 3 member A2	6p22.2	HGNC:1139	11118	ENSG00000186470
BTN3A3	Approved symbol	BTN3A3	butyrophilin subfamily 3 member A3	6p22.2	HGNC:1140	10384	ENSG00000111801
CD74	Approved symbol	CD74	CD74 molecule	5q33.1	HGNC:1697	972	ENSG00000019582
CIITA	Approved symbol	CIITA	class II major histocompatibility complex transactivator	16p13.13	HGNC:7067	4261	ENSG00000179583
CMPK2	Approved symbol	CMPK2	cytidine/uridine monophosphate kinase 2	2p25.2	HGNC:27015	129607	ENSG00000134326
DLK1	Approved symbol	DLK1	delta like non-canonical Notch ligand 1	14q32.2	HGNC:2907	8788	ENSG00000185559
FLT3LG	Approved symbol	FLT3LG	fms related tyrosine kinase 3 ligand	19q13.33	HGNC:3766	2323	ENSG00000090554
GBP1	Approved symbol	GBP1	guanylate binding protein 1	1p22.2	HGNC:4182	2633	ENSG00000117228
GJD3	Approved symbol	GJD3	gap junction protein delta 3	17q21.2	HGNC:19147	125111	ENSG00000183153
HCG4B	Approved symbol	HCG4B	HLA complex group 4B (non-protein coding)	6p22.1	HGNC:22919	80868	ENSG00000227262
HCP5	Approved symbol	HCP5	HLA complex P5 (non-protein coding)	6p21.33	HGNC:21659	10866	ENSG00000206337
HLA-A	Approved symbol	HLA-A	major histocompatibility complex, class I, A	6p22.1	HGNC:4931	3105	ENSG00000206503
HLA-B	Approved symbol	HLA-B	major histocompatibility complex, class I, B	6p21.33	HGNC:4932	3106	ENSG00000234745
HLA-C	Approved symbol	HLA-C	major histocompatibility complex, class I, C	6p21.33	HGNC:4933	3107	ENSG00000204525
HLA-DMA	Approved symbol	HLA-DMA	major histocompatibility complex, class II, DM alpha	6p21.32	HGNC:4934	3108	ENSG00000204257
HLA-DMB	Approved symbol	HLA-DMB	major histocompatibility complex, class II, DM beta	6p21.32	HGNC:4935	3109	ENSG00000242574
HLA-DOA	Approved symbol	HLA-DOA	major histocompatibility complex, class II, DO alpha	6p21.32	HGNC:4936	3111	ENSG00000204252
HLA-DPA1	Approved symbol	HLA-DPA1	major histocompatibility complex, class II, DP alpha 1	6p21.32	HGNC:4938	3113	ENSG00000231389
HLA-DPB1	Approved symbol	HLA-DPB1	major histocompatibility complex, class II, DP beta 1	6p21.32	HGNC:4940	3115	ENSG00000223865
HLA-DQA1	Approved symbol	HLA-DQA1	major histocompatibility complex, class II, DQ alpha 1	6p21.32	HGNC:4942	3117	ENSG00000196735
HLA-DRA	Approved symbol	HLA-DRA	major histocompatibility complex, class II, DR alpha	6p21.32	HGNC:4947	3122	ENSG00000204287
HLA-DRB1	Approved symbol	HLA-DRB1	major histocompatibility complex, class II, DR beta 1	6p21.32	HGNC:4948	3123	ENSG00000196126
HLA-F	Approved symbol	HLA-F	major histocompatibility complex, class I, F	6p22.1	HGNC:4963	3134	ENSG00000204642
HLA-H	Approved symbol	HLA-H	major histocompatibility complex, class I, H (pseudogene)	6p22.1	HGNC:4965	3136	ENSG00000206341
HLA-J	Approved symbol	HLA-J	major histocompatibility complex, class I, J (pseudogene)	6p22.1	HGNC:4967	3137	ENSG00000204622
IFI35	Approved symbol	IFI35	interferon induced protein 35	17q21.31	HGNC:5399	3430	ENSG00000068079
IFIT3	Approved symbol	IFIT3	interferon induced protein with tetratricopeptide repeats 3	10q23.31	HGNC:5411	3437	ENSG00000119917
IGF2	Approved symbol	IGF2	insulin like growth factor 2	11p15.5	HGNC:5466	3481	ENSG00000167244
IRF1	Approved symbol	IRF1	interferon regulatory factor 1	5q31.1	HGNC:6116	3659	ENSG00000125347
IRF9	Approved symbol	IRF9	interferon regulatory factor 9	14q12	HGNC:6131	10379	ENSG00000213928
LIME1	Approved symbol	LIME1	Lck interacting transmembrane adaptor 1	20q13.33	HGNC:26016	54923	ENSG00000203896
LYSMD2	Approved symbol	LYSMD2	LysM domain containing 2	15q21.2	HGNC:28571	256586	ENSG00000140280
NLRC5	Approved symbol	NLRC5	NLR family CARD domain containing 5	16q13	HGNC:29933	84166	ENSG00000140853
NMI	Approved symbol	NMI	N-myc and STAT interactor	2q23.3	HGNC:7854	9111	ENSG00000123609
PARP12	Approved symbol	PARP12	poly(ADP-ribose) polymerase family member 12	7q34	HGNC:21919	64761	ENSG00000059378
PARP14	Approved symbol	PARP14	poly(ADP-ribose) polymerase family member 14	3q21.1	HGNC:29232	54625	ENSG00000173193
PARP9	Approved symbol	PARP9	poly(ADP-ribose) polymerase family member 9	3q21.1	HGNC:24118	83666	ENSG00000138496
PDE3A	Approved symbol	PDE3A	phosphodiesterase 3A	12p12.2	HGNC:8778	5139	ENSG00000172572
PRORSD1P	Approved symbol	PRORSD1P	prolyl-tRNA synthetase associated domain containing 1, pseudogene	2p16.1	HGNC:34379	344405	ENSG00000162997
PSMB8	Approved symbol	PSMB8	proteasome subunit beta 8	6p21.32	HGNC:9545	5696	ENSG00000204264
PSMB9	Approved symbol	PSMB9	proteasome subunit beta 9	6p21.32	HGNC:9546	5698	ENSG00000240065
PSME1	Approved symbol	PSME1	proteasome activator subunit 1	14q12	HGNC:9568	5720	ENSG00000092010
PSME2	Approved symbol	PSME2	proteasome activator subunit 2	14q12	HGNC:9569	5721	ENSG00000100911
RARRES3	Approved symbol	RARRES3	retinoic acid receptor responder 3	11q12.3	HGNC:9869	5920	ENSG00000133321
RNASET2	Approved symbol	RNASET2	ribonuclease T2	6q27	HGNC:21686	8635	ENSG00000026297
RPS6KA2	Approved symbol	RPS6KA2	ribosomal protein S6 kinase A2	6q27	HGNC:10431	6196	ENSG00000071242
SCPEP1	Approved symbol	SCPEP1	serine carboxypeptidase 1	17q22	HGNC:29507	59342	ENSG00000121064
SPOCK2	Approved symbol	SPOCK2	SPARC (osteonectin), cwcv and kazal like domains proteoglycan 2	10q22.1	HGNC:13564	9806	ENSG00000107742
STAT1	Approved symbol	STAT1	signal transducer and activator of transcription 1	2q32.2	HGNC:11362	6772	ENSG00000115415
TAP1	Approved symbol	TAP1	transporter 1, ATP binding cassette subfamily B member	6p21.32	HGNC:43	6890	ENSG00000168394
TAP2	Approved symbol	TAP2	transporter 2, ATP binding cassette subfamily B member	6p21.32	HGNC:44	6891	ENSG00000204267
TPK1	Approved symbol	TPK1	thiamin pyrophosphokinase 1	7q35	HGNC:17358	27010	ENSG00000196511
UBA7	Approved symbol	UBA7	ubiquitin like modifier activating enzyme 7	3p21.31	HGNC:12471	7318	ENSG00000182179
UBE2L6	Approved symbol	UBE2L6	ubiquitin conjugating enzyme E2 L6	11q12.1	HGNC:12490	9246	ENSG00000156587
ZCCHC9	Approved symbol	ZCCHC9	zinc finger CCHC-type containing 9	5q14.1	HGNC:25424	84240	ENSG00000131732

## Sheet: M3
HGNC gene symbol	Gene symbol annotation status	Corresponding approved gene symbol	Corresponding approved name	Location	Associated HGNC ID	Associated Entrez ID	Associated Ensembl ID
AACS	Approved symbol	AACS	acetoacetyl-CoA synthetase	12q24.31	HGNC:21298	65985	ENSG00000081760
AAMP	Approved symbol	AAMP	angio associated migratory cell protein	2q35	HGNC:18	14	ENSG00000127837
AAR2	Approved symbol	AAR2	AAR2 splicing factor homolog	20q11.23	HGNC:15886	25980	ENSG00000131043
AARS2	Approved symbol	AARS2	alanyl-tRNA synthetase 2, mitochondrial	6p21.1	HGNC:21022	57505	ENSG00000124608
ABCA2	Approved symbol	ABCA2	ATP binding cassette subfamily A member 2	9q34.3	HGNC:32	20	ENSG00000107331
ABCA3	Approved symbol	ABCA3	ATP binding cassette subfamily A member 3	16p13.3	HGNC:33	21	ENSG00000167972
ABCB10	Approved symbol	ABCB10	ATP binding cassette subfamily B member 10	1q42.13	HGNC:41	23456	ENSG00000135776
ABCB6	Approved symbol	ABCB6	ATP binding cassette subfamily B member 6 (Langereis blood group)	2q35	HGNC:47	10058	ENSG00000115657
ABCB8	Approved symbol	ABCB8	ATP binding cassette subfamily B member 8	7q36.1	HGNC:49	11194	ENSG00000197150
ABCD1	Approved symbol	ABCD1	ATP binding cassette subfamily D member 1	Xq28	HGNC:61	215	ENSG00000101986
ABCF2	Approved symbol	ABCF2	ATP binding cassette subfamily F member 2	7q36.1	HGNC:71	10061	ENSG00000033050
ABCG1	Approved symbol	ABCG1	ATP binding cassette subfamily G member 1	21q22.3	HGNC:73	9619	ENSG00000160179
ABHD16B	Approved symbol	ABHD16B	abhydrolase domain containing 16B	20q13.33	HGNC:16128	140701	ENSG00000183260
ABLIM2	Approved symbol	ABLIM2	actin binding LIM protein family member 2	4p16.1	HGNC:19195	84448	ENSG00000163995
ACD	Approved symbol	ACD	ACD, shelterin complex subunit and telomerase recruitment factor	16q22.1	HGNC:25070	65057	ENSG00000102977
ACTR1A	Approved symbol	ACTR1A	ARP1 actin related protein 1 homolog A	10q24.32	HGNC:167	10121	ENSG00000138107
ADAMTSL4	Approved symbol	ADAMTSL4	ADAMTS like 4	1q21.2	HGNC:19706	54507	ENSG00000143382
ADCK2	Approved symbol	ADCK2	aarF domain containing kinase 2	7q34	HGNC:19039	90956	ENSG00000133597
ADCK5	Approved symbol	ADCK5	aarF domain containing kinase 5	8q24.3	HGNC:21738	203054	ENSG00000173137
ADCY2	Approved symbol	ADCY2	adenylate cyclase 2	5p15.31	HGNC:233	108	ENSG00000078295
ADPRH	Approved symbol	ADPRH	ADP-ribosylarginine hydrolase	3q13.33	HGNC:269	141	ENSG00000144843
ADPRHL2	Approved symbol	ADPRHL2	ADP-ribosylhydrolase like 2	1p34.3	HGNC:21304	54936	ENSG00000116863
ADRBK1	Previous symbol	GRK2	G protein-coupled receptor kinase 2	11q13.2	HGNC:289	156	ENSG00000173020
ADRM1	Approved symbol	ADRM1	adhesion regulating molecule 1	20q13.33	HGNC:15759	11047	ENSG00000130706
AGAP3	Approved symbol	AGAP3	ArfGAP with GTPase domain, ankyrin repeat and PH domain 3	7q36.1	HGNC:16923	116988	ENSG00000133612
AGFG2	Approved symbol	AGFG2	ArfGAP with FG repeats 2	7q22.1	HGNC:5177	3268	ENSG00000106351
AGPAT2	Approved symbol	AGPAT2	1-acylglycerol-3-phosphate O-acyltransferase 2	9q34.3	HGNC:325	10555	ENSG00000169692
AGT	Approved symbol	AGT	angiotensinogen	1q42.2	HGNC:333	183	ENSG00000135744
AHCY	Approved symbol	AHCY	adenosylhomocysteinase	20q11.22	HGNC:343	191	ENSG00000101444
AKR1A1	Approved symbol	AKR1A1	aldo-keto reductase family 1 member A1	1p34.1	HGNC:380	10327	ENSG00000117448
AKT1	Approved symbol	AKT1	AKT serine/threonine kinase 1	14q32.33	HGNC:391	207	ENSG00000142208
AKT1S1	Approved symbol	AKT1S1	AKT1 substrate 1	19q13.33	HGNC:28426	84335	ENSG00000204673
ALAD	Approved symbol	ALAD	aminolevulinate dehydratase	9q32	HGNC:395	210	ENSG00000148218
ALDH1B1	Approved symbol	ALDH1B1	aldehyde dehydrogenase 1 family member B1	9p13.1	HGNC:407	219	ENSG00000137124
ALDH3A2	Approved symbol	ALDH3A2	aldehyde dehydrogenase 3 family member A2	17p11.2	HGNC:403	224	ENSG00000072210
ALDH9A1	Approved symbol	ALDH9A1	aldehyde dehydrogenase 9 family member A1	1q24.1	HGNC:412	223	ENSG00000143149
ALG12	Approved symbol	ALG12	ALG12, alpha-1,6-mannosyltransferase	22q13.33	HGNC:19358	79087	ENSG00000182858
ALG3	Approved symbol	ALG3	ALG3, alpha-1,3- mannosyltransferase	3q27.1	HGNC:23056	10195	ENSG00000214160
AMFR	Approved symbol	AMFR	autocrine motility factor receptor	16q13	HGNC:463	267	ENSG00000159461
ANAPC2	Approved symbol	ANAPC2	anaphase promoting complex subunit 2	9q34.3	HGNC:19989	29882	ENSG00000176248
ANKRD13B	Approved symbol	ANKRD13B	ankyrin repeat domain 13B	17q11.2	HGNC:26363	124930	ENSG00000198720
ANKRD33B	Approved symbol	ANKRD33B	ankyrin repeat domain 33B	5p15.2	HGNC:35240	651746	ENSG00000164236
ANKRD9	Approved symbol	ANKRD9	ankyrin repeat domain 9	14q32.31	HGNC:20096	122416	ENSG00000156381
ANO10	Approved symbol	ANO10	anoctamin 10	3p22.1-p21.33	HGNC:25519	55129	ENSG00000160746
ANO8	Approved symbol	ANO8	anoctamin 8	19p13.11	HGNC:29329	57719	ENSG00000074855
ANP32AP1	Approved symbol	ANP32AP1	acidic nuclear phosphoprotein 32 family member A pseudogene 1	15q14	HGNC:42949	723972	ENSG00000259516
ANXA11	Approved symbol	ANXA11	annexin A11	10q22.3	HGNC:535	311	ENSG00000122359
ANXA6	Approved symbol	ANXA6	annexin A6	5q33.1	HGNC:544	309	ENSG00000197043
ANXA7	Approved symbol	ANXA7	annexin A7	10q22.2	HGNC:545	310	ENSG00000138279
AP1B1	Approved symbol	AP1B1	adaptor related protein complex 1 beta 1 subunit	22q12.2	HGNC:554	162	ENSG00000100280
AP1M1	Approved symbol	AP1M1	adaptor related protein complex 1 mu 1 subunit	19p13.11	HGNC:13667	8907	ENSG00000072958
AP2A1	Approved symbol	AP2A1	adaptor related protein complex 2 alpha 1 subunit	19q13.33	HGNC:561	160	ENSG00000196961
AP2M1	Approved symbol	AP2M1	adaptor related protein complex 2 mu 1 subunit	3q27.1	HGNC:564	1173	ENSG00000161203
AP2S1	Approved symbol	AP2S1	adaptor related protein complex 2 sigma 1 subunit	19q13.32	HGNC:565	1175	ENSG00000042753
AP3B1	Approved symbol	AP3B1	adaptor related protein complex 3 beta 1 subunit	5q14.1	HGNC:566	8546	ENSG00000132842
APBA3	Approved symbol	APBA3	amyloid beta precursor protein binding family A member 3	19p13.3	HGNC:580	9546	ENSG00000011132
APEX2	Approved symbol	APEX2	apurinic/apyrimidinic endodeoxyribonuclease 2	Xp11.21	HGNC:17889	27301	ENSG00000169188
APH1A	Approved symbol	APH1A	aph-1 homolog A, gamma-secretase subunit	1q21.2	HGNC:29509	51107	ENSG00000117362
APLN	Approved symbol	APLN	apelin	Xq26.1	HGNC:16665	8862	ENSG00000171388
APOM	Approved symbol	APOM	apolipoprotein M	6p21.33	HGNC:13916	55937	ENSG00000204444
APRT	Approved symbol	APRT	adenine phosphoribosyltransferase	16q24.3	HGNC:626	353	ENSG00000198931
AREL1	Approved symbol	AREL1	apoptosis resistant E3 ubiquitin protein ligase 1	14q24.3	HGNC:20363	9870	ENSG00000119682
ARF1	Approved symbol	ARF1	ADP ribosylation factor 1	1q42.13	HGNC:652	375	ENSG00000143761
ARF6	Approved symbol	ARF6	ADP ribosylation factor 6	14q21.3	HGNC:659	382	ENSG00000165527
ARFRP1	Approved symbol	ARFRP1	ADP ribosylation factor related protein 1	20q13.33	HGNC:662	10139	ENSG00000101246
ARHGEF37	Approved symbol	ARHGEF37	Rho guanine nucleotide exchange factor 37	5q32	HGNC:34430	389337	ENSG00000183111
ARL8A	Approved symbol	ARL8A	ADP ribosylation factor like GTPase 8A	1q32.1	HGNC:25192	127829	ENSG00000143862
ARMC5	Approved symbol	ARMC5	armadillo repeat containing 5	16p11.2	HGNC:25781	79798	ENSG00000140691
ARMC6	Approved symbol	ARMC6	armadillo repeat containing 6	19p13.11	HGNC:25049	93436	ENSG00000105676
ARMC7	Approved symbol	ARMC7	armadillo repeat containing 7	17q25.1	HGNC:26168	79637	ENSG00000125449
ARPP21	Approved symbol	ARPP21	cAMP regulated phosphoprotein 21	3p22.3	HGNC:16968	10777	ENSG00000172995
ARRDC1	Approved symbol	ARRDC1	arrestin domain containing 1	9q34.3	HGNC:28633	92714	ENSG00000197070
ARSB	Approved symbol	ARSB	arylsulfatase B	5q14.1	HGNC:714	411	ENSG00000113273
ARSG	Approved symbol	ARSG	arylsulfatase G	17q24.2	HGNC:24102	22901	ENSG00000141337
ASAP3	Approved symbol	ASAP3	ArfGAP with SH3 domain, ankyrin repeat and PH domain 3	1p36.12	HGNC:14987	55616	ENSG00000088280
ASB13	Approved symbol	ASB13	ankyrin repeat and SOCS box containing 13	10p15.1	HGNC:19765	79754	ENSG00000196372
ASMTL	Approved symbol	ASMTL	acetylserotonin O-methyltransferase like	Xp22.3 and Yp11.3	HGNC:751	8623	ENSG00000169093
ASPSCR1	Approved symbol	ASPSCR1	ASPSCR1, UBX domain containing tether for SLC2A4	17q25.3	HGNC:13825	79058	ENSG00000169696
ASRGL1	Approved symbol	ASRGL1	asparaginase like 1	11q12.3	HGNC:16448	80150	ENSG00000162174
ASS1	Approved symbol	ASS1	argininosuccinate synthase 1	9q34.11	HGNC:758	445	ENSG00000130707
ATAD3C	Approved symbol	ATAD3C	ATPase family, AAA domain containing 3C	1p36.33	HGNC:32151	219293	ENSG00000215915
ATG7	Approved symbol	ATG7	autophagy related 7	3p25.3	HGNC:16935	10533	ENSG00000197548
ATG9A	Approved symbol	ATG9A	autophagy related 9A	2q35	HGNC:22408	79065	ENSG00000198925
ATP13A2	Approved symbol	ATP13A2	ATPase cation transporting 13A2	1p36.13	HGNC:30213	23400	ENSG00000159363
ATP1B4	Approved symbol	ATP1B4	ATPase Na+/K+ transporting family member beta 4	Xq24	HGNC:808	23439	ENSG00000101892
ATP6AP1	Approved symbol	ATP6AP1	ATPase H+ transporting accessory protein 1	Xq28	HGNC:868	537	ENSG00000071553
ATP6V0C	Approved symbol	ATP6V0C	ATPase H+ transporting V0 subunit c	16p13.3	HGNC:855	527	ENSG00000185883
ATP6V0D1	Approved symbol	ATP6V0D1	ATPase H+ transporting V0 subunit d1	16q22.1	HGNC:13724	9114	ENSG00000159720
ATP6V0E2	Approved symbol	ATP6V0E2	ATPase H+ transporting V0 subunit e2	7q36.1	HGNC:21723	155066	ENSG00000171130
ATP9A	Approved symbol	ATP9A	ATPase phospholipid transporting 9A (putative)	20q13.2	HGNC:13540	10079	ENSG00000054793
ATXN7L3	Approved symbol	ATXN7L3	ataxin 7 like 3	17q21.31	HGNC:25416	56970	ENSG00000087152
AZI1	Previous symbol	CEP131	centrosomal protein 131	17q25.3	HGNC:29511	22994	ENSG00000141577
B3GALT6	Approved symbol	B3GALT6	beta-1,3-galactosyltransferase 6	1p36.33	HGNC:17978	126792	ENSG00000176022
B4GALT7	Approved symbol	B4GALT7	beta-1,4-galactosyltransferase 7	5q35.3	HGNC:930	11285	ENSG00000027847
BAG6	Approved symbol	BAG6	BCL2 associated athanogene 6	6p21.33	HGNC:13919	7917	ENSG00000204463
BAP1	Approved symbol	BAP1	BRCA1 associated protein 1	3p21.1	HGNC:950	8314	ENSG00000163930
BBS4	Approved symbol	BBS4	Bardet-Biedl syndrome 4	15q24.1	HGNC:969	585	ENSG00000140463
BCAR3	Approved symbol	BCAR3	BCAR3, NSP family adaptor protein	1p22.1	HGNC:973	8412	ENSG00000137936
BCL2L13	Approved symbol	BCL2L13	BCL2 like 13	22q11.21	HGNC:17164	23786	ENSG00000099968
BECN1	Approved symbol	BECN1	beclin 1	17q21.31	HGNC:1034	8678	ENSG00000126581
BIN1	Approved symbol	BIN1	bridging integrator 1	2q14.3	HGNC:1052	274	ENSG00000136717
BLCAP	Approved symbol	BLCAP	bladder cancer associated protein	20q11.23	HGNC:1055	10904	ENSG00000166619
BMS1P20	Approved symbol	BMS1P20	BMS1, ribosome biogenesis factor pseudogene 20	22q11.22	HGNC:49153	96610	ENSG00000236850
BOP1	Approved symbol	BOP1	block of proliferation 1	8q24.3	HGNC:15519	23246	ENSG00000261236
BRD9	Approved symbol	BRD9	bromodomain containing 9	5p15.33	HGNC:25818	65980	ENSG00000028310
BSG	Approved symbol	BSG	basigin (Ok blood group)	19p13.3	HGNC:1116	682	ENSG00000172270
C11orf49	Approved symbol	C11orf49	chromosome 11 open reading frame 49	11p11.2	HGNC:28720	79096	ENSG00000149179
C11orf68	Approved symbol	C11orf68	chromosome 11 open reading frame 68	11q13.1	HGNC:28801	83638	ENSG00000175573
C11orf84	Previous symbol	SPINDOC	spindlin interactor and repressor of chromatin binding	11q13.1	HGNC:25115	144097	ENSG00000168005
C12orf10	Approved symbol	C12orf10	chromosome 12 open reading frame 10	12q13.13	HGNC:17590	60314	ENSG00000139637
C12orf43	Approved symbol	C12orf43	chromosome 12 open reading frame 43	12q24.31	HGNC:25719	64897	ENSG00000157895
C14orf80	Previous symbol	TEDC1	tubulin epsilon and delta complex 1	14q32.33	HGNC:20127	283643	ENSG00000185347
C15orf59	Approved symbol	C15orf59	chromosome 15 open reading frame 59	15q24.1	HGNC:33753	388135	ENSG00000205363
C16orf45	Approved symbol	C16orf45	chromosome 16 open reading frame 45	16p13.11	HGNC:19213	89927	ENSG00000166780
C16orf70	Approved symbol	C16orf70	chromosome 16 open reading frame 70	16q22.1	HGNC:29564	80262	ENSG00000125149
C16orf72	Approved symbol	C16orf72	chromosome 16 open reading frame 72	16p13.2	HGNC:30103	29035	ENSG00000182831
C17orf70	Previous symbol	FAAP100	Fanconi anemia core complex associated protein 100	17q25.3	HGNC:26171	80233	ENSG00000185504
C19orf48	Approved symbol	C19orf48	chromosome 19 open reading frame 48	19q13.33	HGNC:29667	84798	ENSG00000167747
C1orf216	Approved symbol	C1orf216	chromosome 1 open reading frame 216	1p34.3	HGNC:26800	127703	ENSG00000142686
C1orf86	Previous symbol	FAAP20	Fanconi anemia core complex associated protein 20	1p36.33	HGNC:26428	199990	ENSG00000162585
C20orf27	Approved symbol	C20orf27	chromosome 20 open reading frame 27	20p13	HGNC:15873	54976	ENSG00000101220
C21orf2	Approved symbol	C21orf2	chromosome 21 open reading frame 2	21q22.3	HGNC:1260	755	ENSG00000160226
C22orf46	Approved symbol	C22orf46	chromosome 22 open reading frame 46	22q13.2	HGNC:26294	79640	ENSG00000184208
C5orf55	Previous symbol	EXOC3-AS1	EXOC3 antisense RNA 1	5p15.33	HGNC:25175	116349	ENSG00000221990
C6orf120	Approved symbol	C6orf120	chromosome 6 open reading frame 120	6q27	HGNC:21247	387263	ENSG00000185127
C6orf226	Approved symbol	C6orf226	chromosome 6 open reading frame 226	6p21.1	HGNC:34431	441150	ENSG00000221821
C6orf47	Approved symbol	C6orf47	chromosome 6 open reading frame 47	6p21.33	HGNC:19076	57827	ENSG00000204439
C6orf62	Approved symbol	C6orf62	chromosome 6 open reading frame 62	6p22.3	HGNC:20998	81688	ENSG00000112308
C7orf26	Approved symbol	C7orf26	chromosome 7 open reading frame 26	7p22.1	HGNC:21702	79034	ENSG00000146576
C7orf49	Previous symbol	CYREN	cell cycle regulator of NHEJ	7q33	HGNC:22432	78996	ENSG00000122783
C8orf82	Approved symbol	C8orf82	chromosome 8 open reading frame 82	8q24.3	HGNC:33826	414919	ENSG00000213563
C9orf129	Approved symbol	C9orf129	chromosome 9 open reading frame 129	9q22.31	HGNC:31116	445577	ENSG00000204352
C9orf16	Approved symbol	C9orf16	chromosome 9 open reading frame 16	9q34.11	HGNC:17823	79095	ENSG00000171159
CACFD1	Approved symbol	CACFD1	calcium channel flower domain containing 1	9q34.2	HGNC:1365	11094	ENSG00000160325
CACNB1	Approved symbol	CACNB1	calcium voltage-gated channel auxiliary subunit beta 1	17q12	HGNC:1401	782	ENSG00000067191
CACNG1	Approved symbol	CACNG1	calcium voltage-gated channel auxiliary subunit gamma 1	17q24.2	HGNC:1405	786	ENSG00000108878
CACNG6	Approved symbol	CACNG6	calcium voltage-gated channel auxiliary subunit gamma 6	19q13.42	HGNC:13625	59285	ENSG00000130433
CACTIN	Approved symbol	CACTIN	cactin, spliceosome C complex subunit	19p13.3	HGNC:29938	58509	ENSG00000105298
CADM4	Approved symbol	CADM4	cell adhesion molecule 4	19q13.31	HGNC:30825	199731	ENSG00000105767
CAMK2B	Approved symbol	CAMK2B	calcium/calmodulin dependent protein kinase II beta	7p13	HGNC:1461	816	ENSG00000058404
CAMK2D	Approved symbol	CAMK2D	calcium/calmodulin dependent protein kinase II delta	4q26	HGNC:1462	817	ENSG00000145349
CAMTA2	Approved symbol	CAMTA2	calmodulin binding transcription activator 2	17p13.2	HGNC:18807	23125	ENSG00000108509
CAPN1	Approved symbol	CAPN1	calpain 1	11q13.1	HGNC:1476	823	ENSG00000014216
CAPNS1	Approved symbol	CAPNS1	calpain small subunit 1	19q13.12	HGNC:1481	826	ENSG00000126247
CARM1	Approved symbol	CARM1	coactivator associated arginine methyltransferase 1	19p13.2	HGNC:23393	10498	ENSG00000142453
CARS	Approved symbol	CARS	cysteinyl-tRNA synthetase	11p15.4	HGNC:1493	833	ENSG00000110619
CC2D1A	Approved symbol	CC2D1A	coiled-coil and C2 domain containing 1A	19p13.12	HGNC:30237	54862	ENSG00000132024
CCDC113	Approved symbol	CCDC113	coiled-coil domain containing 113	16q21	HGNC:25002	29070	ENSG00000103021
CCDC137	Approved symbol	CCDC137	coiled-coil domain containing 137	17q25.3	HGNC:33451	339230	ENSG00000185298
CCNF	Approved symbol	CCNF	cyclin F	16p13.3	HGNC:1591	899	ENSG00000162063
CCR10	Approved symbol	CCR10	C-C motif chemokine receptor 10	17q21.2	HGNC:4474	2826	ENSG00000184451
CCT6B	Approved symbol	CCT6B	chaperonin containing TCP1 subunit 6B	17q12	HGNC:1621	10693	ENSG00000132141
CCZ1B	Approved symbol	CCZ1B	CCZ1 homolog B, vacuolar protein trafficking and biogenesis associated	7p22.1	HGNC:21717	221960	ENSG00000146574
CD2BP2	Approved symbol	CD2BP2	CD2 cytoplasmic tail binding protein 2	16p11.2	HGNC:1656	10421	ENSG00000169217
CD320	Approved symbol	CD320	CD320 molecule	19p13.2	HGNC:16692	51293	ENSG00000167775
CDH13	Approved symbol	CDH13	cadherin 13	16q23.3	HGNC:1753	1012	ENSG00000140945
CDH15	Approved symbol	CDH15	cadherin 15	16q24.3	HGNC:1754	1013	ENSG00000129910
CDK11A	Approved symbol	CDK11A	cyclin dependent kinase 11A	1p36.33	HGNC:1730	728642	ENSG00000008128
CDK11B	Approved symbol	CDK11B	cyclin dependent kinase 11B	1p36.33	HGNC:1729	984	ENSG00000248333
CDK2AP2	Approved symbol	CDK2AP2	cyclin dependent kinase 2 associated protein 2	11q13.2	HGNC:30833	10263	ENSG00000167797
CDK5	Approved symbol	CDK5	cyclin dependent kinase 5	7q36.1	HGNC:1774	1020	ENSG00000164885
CDKN2B	Approved symbol	CDKN2B	cyclin dependent kinase inhibitor 2B	9p21.3	HGNC:1788	1030	ENSG00000147883
CDKN2D	Approved symbol	CDKN2D	cyclin dependent kinase inhibitor 2D	19p13.2	HGNC:1790	1032	ENSG00000129355
CENPB	Approved symbol	CENPB	centromere protein B	20p13	HGNC:1852	1059	ENSG00000125817
CENPBD1	Approved symbol	CENPBD1	CENPB DNA-binding domain containing 1	16q24.3	HGNC:28272	92806	ENSG00000177946
CENPBD1P1	Approved symbol	CENPBD1P1	CENPB DNA-binding domains containing 1 pseudogene 1	19q13.43	HGNC:28421	65996	ENSG00000213753
CENPH	Approved symbol	CENPH	centromere protein H	5q13.2	HGNC:17268	64946	ENSG00000153044
CERS1	Approved symbol	CERS1	ceramide synthase 1	19p13.11	HGNC:14253	10715	ENSG00000223802
CHAF1A	Approved symbol	CHAF1A	chromatin assembly factor 1 subunit A	19p13.3	HGNC:1910	10036	ENSG00000167670
CHID1	Approved symbol	CHID1	chitinase domain containing 1	11p15.5	HGNC:28474	66005	ENSG00000177830
CHML	Approved symbol	CHML	CHM like, Rab escort protein 2	1q43	HGNC:1941	1122	ENSG00000203668
CHMP1A	Approved symbol	CHMP1A	charged multivesicular body protein 1A	16q24.3	HGNC:8740	5119	ENSG00000131165
CHP1	Approved symbol	CHP1	calcineurin like EF-hand protein 1	15q15.1	HGNC:17433	11261	ENSG00000187446
CHRNB1	Approved symbol	CHRNB1	cholinergic receptor nicotinic beta 1 subunit	17p13.1	HGNC:1961	1140	ENSG00000170175
CHRND	Approved symbol	CHRND	cholinergic receptor nicotinic delta subunit	2q37.1	HGNC:1965	1144	ENSG00000135902
CHST10	Approved symbol	CHST10	carbohydrate sulfotransferase 10	2q11.2	HGNC:19650	9486	ENSG00000115526
CHST12	Approved symbol	CHST12	carbohydrate sulfotransferase 12	7p22.3	HGNC:17423	55501	ENSG00000136213
CITED4	Approved symbol	CITED4	Cbp/p300 interacting transactivator with Glu/Asp rich carboxy-terminal domain 4	1p34.2	HGNC:18696	163732	ENSG00000179862
CIZ1	Approved symbol	CIZ1	CDKN1A interacting zinc finger protein 1	9q34.11	HGNC:16744	25792	ENSG00000148337
CLCN7	Approved symbol	CLCN7	chloride voltage-gated channel 7	16p13.3	HGNC:2025	1186	ENSG00000103249
CLN6	Approved symbol	CLN6	CLN6, transmembrane ER protein	15q23	HGNC:2077	54982	ENSG00000128973
CLPTM1	Approved symbol	CLPTM1	CLPTM1, transmembrane protein	19q13.32	HGNC:2087	1209	ENSG00000104853
CNPPD1	Approved symbol	CNPPD1	cyclin Pas1/PHO80 domain containing 1	2q35	HGNC:25220	27013	ENSG00000115649
CNTFR	Approved symbol	CNTFR	ciliary neurotrophic factor receptor	9p13.3	HGNC:2170	1271	ENSG00000122756
COBL	Approved symbol	COBL	cordon-bleu WH2 repeat protein	7p12.1	HGNC:22199	23242	ENSG00000106078
COMT	Approved symbol	COMT	catechol-O-methyltransferase	22q11.21	HGNC:2228	1312	ENSG00000093010
COPG2	Approved symbol	COPG2	coatomer protein complex subunit gamma 2	7q32.2	HGNC:2237	26958	ENSG00000158623
COPS7A	Approved symbol	COPS7A	COP9 signalosome subunit 7A	12p13.31	HGNC:16758	50813	ENSG00000111652
COQ4	Approved symbol	COQ4	coenzyme Q4	9q34.11	HGNC:19693	51117	ENSG00000167113
CORO6	Approved symbol	CORO6	coronin 6	17q11.2	HGNC:21356	84940	ENSG00000167549
CPSF3L	Previous symbol	INTS11	integrator complex subunit 11	1p36.33	HGNC:26052	54973	ENSG00000127054
CPSF4	Approved symbol	CPSF4	cleavage and polyadenylation specific factor 4	7q22.1	HGNC:2327	10898	ENSG00000160917
CREB3	Approved symbol	CREB3	cAMP responsive element binding protein 3	9p13.3	HGNC:2347	10488	ENSG00000107175
CRELD1	Approved symbol	CRELD1	cysteine rich with EGF like domains 1	3p25.3	HGNC:14630	78987	ENSG00000163703
CRSP8P	Unmatched
CRTAP	Approved symbol	CRTAP	cartilage associated protein	3p22.3	HGNC:2379	10491	ENSG00000170275
CRTC1	Approved symbol	CRTC1	CREB regulated transcription coactivator 1	19p13.11	HGNC:16062	23373	ENSG00000105662
CSK	Approved symbol	CSK	C-terminal Src kinase	15q24.1	HGNC:2444	1445	ENSG00000103653
CSNK1D	Approved symbol	CSNK1D	casein kinase 1 delta	17q25.3	HGNC:2452	1453	ENSG00000141551
CSNK1G2	Approved symbol	CSNK1G2	casein kinase 1 gamma 2	19p13.3	HGNC:2455	1455	ENSG00000133275
CSNK2A2	Approved symbol	CSNK2A2	casein kinase 2 alpha 2	16q21	HGNC:2459	1459	ENSG00000070770
CSNK2B	Approved symbol	CSNK2B	casein kinase 2 beta	6p21.33	HGNC:2460	1460	ENSG00000204435
CSTB	Approved symbol	CSTB	cystatin B	21q22.3	HGNC:2482	1476	ENSG00000160213
CTBP1	Approved symbol	CTBP1	C-terminal binding protein 1	4p16.3	HGNC:2494	1487	ENSG00000159692
CTDP1	Approved symbol	CTDP1	CTD phosphatase subunit 1	18q23	HGNC:2498	9150	ENSG00000060069
CTNNBL1	Approved symbol	CTNNBL1	catenin beta like 1	20q11.23	HGNC:15879	56259	ENSG00000132792
CTSA	Approved symbol	CTSA	cathepsin A	20q13.12	HGNC:9251	5476	ENSG00000064601
CTU1	Approved symbol	CTU1	cytosolic thiouridylase subunit 1	19q13.41	HGNC:29590	90353	ENSG00000142544
CTU2	Approved symbol	CTU2	cytosolic thiouridylase subunit 2	16q24.3	HGNC:28005	348180	ENSG00000174177
CUL7	Approved symbol	CUL7	cullin 7	6p21.1	HGNC:21024	9820	ENSG00000044090
CYB5R3	Approved symbol	CYB5R3	cytochrome b5 reductase 3	22q13.2	HGNC:2873	1727	ENSG00000100243
CYP11A1	Approved symbol	CYP11A1	cytochrome P450 family 11 subfamily A member 1	15q24.1	HGNC:2590	1583	ENSG00000140459
DAGLA	Approved symbol	DAGLA	diacylglycerol lipase alpha	11q12.2	HGNC:1165	747	ENSG00000134780
DAK	Previous symbol	TKFC	triokinase and FMN cyclase	11q12.2	HGNC:24552	26007	ENSG00000149476
DALRD3	Approved symbol	DALRD3	DALR anticodon binding domain containing 3	3p21.31	HGNC:25536	55152	ENSG00000178149
DAXX	Approved symbol	DAXX	death domain associated protein	6p21.32	HGNC:2681	1616	ENSG00000204209
DAZAP1	Approved symbol	DAZAP1	DAZ associated protein 1	19p13.3	HGNC:2683	26528	ENSG00000071626
DBNDD1	Approved symbol	DBNDD1	dysbindin domain containing 1	16q24.3	HGNC:28455	79007	ENSG00000003249
DBNDD2	Approved symbol	DBNDD2	dysbindin domain containing 2	20q13.12	HGNC:15881	55861	ENSG00000244274
DCLRE1A	Approved symbol	DCLRE1A	DNA cross-link repair 1A	10q25.3	HGNC:17660	9937	ENSG00000198924
DCPS	Approved symbol	DCPS	decapping enzyme, scavenger	11q24.2	HGNC:29812	28960	ENSG00000110063
DCTD	Approved symbol	DCTD	dCMP deaminase	4q35.1	HGNC:2710	1635	ENSG00000129187
DDA1	Approved symbol	DDA1	DET1 and DDB1 associated 1	19p13.11	HGNC:28360	79016	ENSG00000130311
DDAH1	Approved symbol	DDAH1	dimethylarginine dimethylaminohydrolase 1	1p22.3	HGNC:2715	23576	ENSG00000153904
DDN	Approved symbol	DDN	dendrin	12q13.12	HGNC:24458	23109	ENSG00000181418
DDOST	Approved symbol	DDOST	dolichyl-diphosphooligosaccharide--protein glycosyltransferase non-catalytic subunit	1p36.12	HGNC:2728	1650	ENSG00000244038
DDR1	Approved symbol	DDR1	discoidin domain receptor tyrosine kinase 1	6p21.33	HGNC:2730	780	ENSG00000204580
DDRGK1	Approved symbol	DDRGK1	DDRGK domain containing 1	20p13	HGNC:16110	65992	ENSG00000198171
DDX19B	Approved symbol	DDX19B	DEAD-box helicase 19B	16q22.1	HGNC:2742	11269	ENSG00000157349
DDX41	Approved symbol	DDX41	DEAD-box helicase 41	5q35.3	HGNC:18674	51428	ENSG00000183258
DDX54	Approved symbol	DDX54	DEAD-box helicase 54	12q24.13	HGNC:20084	79039	ENSG00000123064
DEAF1	Approved symbol	DEAF1	DEAF1, transcription factor	11p15.5	HGNC:14677	10522	ENSG00000177030
DECR2	Approved symbol	DECR2	2,4-dienoyl-CoA reductase 2	16p13.3	HGNC:2754	26063	ENSG00000242612
DEDD	Approved symbol	DEDD	death effector domain containing	1q23.3	HGNC:2755	9191	ENSG00000158796
DENND1A	Approved symbol	DENND1A	DENN domain containing 1A	9q33.3	HGNC:29324	57706	ENSG00000119522
DFFA	Approved symbol	DFFA	DNA fragmentation factor subunit alpha	1p36.22	HGNC:2772	1676	ENSG00000160049
DGAT1	Approved symbol	DGAT1	diacylglycerol O-acyltransferase 1	8q24.3	HGNC:2843	8694	ENSG00000185000
DGCR14	Previous symbol	ESS2	ess-2 splicing factor homolog	22q11.21	HGNC:16817	8220	ENSG00000100056
DGCR8	Approved symbol	DGCR8	DGCR8, microprocessor complex subunit	22q11.21	HGNC:2847	54487	ENSG00000128191
DGKG	Approved symbol	DGKG	diacylglycerol kinase gamma	3q27.2-q27.3	HGNC:2853	1608	ENSG00000058866
DGKQ	Approved symbol	DGKQ	diacylglycerol kinase theta	4p16.3	HGNC:2856	1609	ENSG00000145214
DHRS7	Approved symbol	DHRS7	dehydrogenase/reductase 7	14q23.1	HGNC:21524	51635	ENSG00000100612
DHX30	Approved symbol	DHX30	DExH-box helicase 30	3p21.31	HGNC:16716	22907	ENSG00000132153
DHX34	Approved symbol	DHX34	DExH-box helicase 34	19q13.32	HGNC:16719	9704	ENSG00000134815
DHX37	Approved symbol	DHX37	DEAH-box helicase 37	12q24.31	HGNC:17210	57647	ENSG00000150990
DKC1	Approved symbol	DKC1	dyskerin pseudouridine synthase 1	Xq28	HGNC:2890	1736	ENSG00000130826
DMPK	Approved symbol	DMPK	DM1 protein kinase	19q13.32	HGNC:2933	1760	ENSG00000104936
DMTN	Approved symbol	DMTN	dematin actin binding protein	8p21.3	HGNC:3382	2039	ENSG00000158856
DMWD	Approved symbol	DMWD	DM1 locus, WD repeat containing	19q13.32	HGNC:2936	1762	ENSG00000185800
DNAJB12	Approved symbol	DNAJB12	DnaJ heat shock protein family (Hsp40) member B12	10q22.1	HGNC:14891	54788	ENSG00000148719
DNAJB2	Approved symbol	DNAJB2	DnaJ heat shock protein family (Hsp40) member B2	2q35	HGNC:5228	3300	ENSG00000135924
DNAJC2	Approved symbol	DNAJC2	DnaJ heat shock protein family (Hsp40) member C2	7q22.1	HGNC:13192	27000	ENSG00000105821
DNAJC3-AS1	Approved symbol	DNAJC3-AS1	DNAJC3 antisense RNA 1 (head to head)	13q32.1	HGNC:39808	100289274	ENSG00000247400
DNAJC30	Approved symbol	DNAJC30	DnaJ heat shock protein family (Hsp40) member C30	7q11.23	HGNC:16410	84277	ENSG00000176410
DNAJC5	Approved symbol	DNAJC5	DnaJ heat shock protein family (Hsp40) member C5	20q13.33	HGNC:16235	80331	ENSG00000101152
DNASE1L1	Approved symbol	DNASE1L1	deoxyribonuclease 1 like 1	Xq28	HGNC:2957	1774	ENSG00000013563
DNM2	Approved symbol	DNM2	dynamin 2	19p13.2	HGNC:2974	1785	ENSG00000079805
DNTTIP1	Approved symbol	DNTTIP1	deoxynucleotidyltransferase terminal interacting protein 1	20q13.12	HGNC:16160	116092	ENSG00000101457
DOHH	Approved symbol	DOHH	deoxyhypusine hydroxylase	19p13.3	HGNC:28662	83475	ENSG00000129932
DOK5	Approved symbol	DOK5	docking protein 5	20q13.2	HGNC:16173	55816	ENSG00000101134
DPP7	Approved symbol	DPP7	dipeptidyl peptidase 7	9q34.3	HGNC:14892	29952	ENSG00000176978
DPP9	Approved symbol	DPP9	dipeptidyl peptidase 9	19p13.3	HGNC:18648	91039	ENSG00000142002
DRG2	Approved symbol	DRG2	developmentally regulated GTP binding protein 2	17p11.2	HGNC:3030	1819	ENSG00000108591
DSCR3	Previous symbol	VPS26C	VPS26 endosomal protein sorting factor C	21q22.13	HGNC:3044	10311	ENSG00000157538
DTD1	Approved symbol	DTD1	D-tyrosyl-tRNA deacylase 1	20p11.23	HGNC:16219	92675	ENSG00000125821
DTNB	Approved symbol	DTNB	dystrobrevin beta	2p23.3	HGNC:3058	1838	ENSG00000138101
DUPD1	Approved symbol	DUPD1	dual specificity phosphatase and pro isomerase domain containing 1	10q22.2	HGNC:23481	338599	ENSG00000188716
DUS1L	Approved symbol	DUS1L	dihydrouridine synthase 1 like	17q25.3	HGNC:30086	64118	ENSG00000169718
DVL2	Approved symbol	DVL2	dishevelled segment polarity protein 2	17p13.1	HGNC:3086	1856	ENSG00000004975
DVL3	Approved symbol	DVL3	dishevelled segment polarity protein 3	3q27.1	HGNC:3087	1857	ENSG00000161202
DYNC1I1	Approved symbol	DYNC1I1	dynein cytoplasmic 1 intermediate chain 1	7q21.3	HGNC:2963	1780	ENSG00000158560
DYRK1B	Approved symbol	DYRK1B	dual specificity tyrosine phosphorylation regulated kinase 1B	19q13.2	HGNC:3092	9149	ENSG00000105204
DYSF	Approved symbol	DYSF	dysferlin	2p13.2	HGNC:3097	8291	ENSG00000135636
EBNA1BP2	Approved symbol	EBNA1BP2	EBNA1 binding protein 2	1p34.2	HGNC:15531	10969	ENSG00000117395
EEF1A2	Approved symbol	EEF1A2	eukaryotic translation elongation factor 1 alpha 2	20q13.33	HGNC:3192	1917	ENSG00000101210
EEF2	Approved symbol	EEF2	eukaryotic translation elongation factor 2	19p13.3	HGNC:3214	1938	ENSG00000167658
EEFSEC	Approved symbol	EEFSEC	eukaryotic elongation factor, selenocysteine-tRNA specific	3q21.3	HGNC:24614	60678	ENSG00000132394
EFCAB14	Approved symbol	EFCAB14	EF-hand calcium binding domain 14	1p33	HGNC:29051	9813	ENSG00000159658
EFTUD1	Previous symbol	EFL1	elongation factor like GTPase 1	15q25.2	HGNC:25789	79631	ENSG00000140598
EFTUD2	Approved symbol	EFTUD2	elongation factor Tu GTP binding domain containing 2	17q21.31	HGNC:30858	9343	ENSG00000108883
EHBP1L1	Approved symbol	EHBP1L1	EH domain binding protein 1 like 1	11q13.1	HGNC:30682	254102	ENSG00000173442
EHD1	Approved symbol	EHD1	EH domain containing 1	11q13.1	HGNC:3242	10938	ENSG00000110047
EID2	Approved symbol	EID2	EP300 interacting inhibitor of differentiation 2	19q13.2	HGNC:28292	163126	ENSG00000176396
EIF2B2	Approved symbol	EIF2B2	eukaryotic translation initiation factor 2B subunit beta	14q24.3	HGNC:3258	8892	ENSG00000119718
EIF3C	Approved symbol	EIF3C	eukaryotic translation initiation factor 3 subunit C	16p11.2	HGNC:3279	8663	ENSG00000184110
EIF3CL	Approved symbol	EIF3CL	eukaryotic translation initiation factor 3 subunit C like	16p12.1	HGNC:26347	728689	ENSG00000205609
EIF3D	Approved symbol	EIF3D	eukaryotic translation initiation factor 3 subunit D	22q12.3	HGNC:3278	8664	ENSG00000100353
EIF3I	Approved symbol	EIF3I	eukaryotic translation initiation factor 3 subunit I	1p35.2	HGNC:3272	8668	ENSG00000084623
EIF5A	Approved symbol	EIF5A	eukaryotic translation initiation factor 5A	17p13.1	HGNC:3300	1984	ENSG00000132507
EIF5AL1	Approved symbol	EIF5AL1	eukaryotic translation initiation factor 5A-like 1	10q22.3	HGNC:17419	143244	ENSG00000253626
ELK1	Approved symbol	ELK1	ELK1, ETS transcription factor	Xp11.23	HGNC:3321	2002	ENSG00000126767
EMD	Approved symbol	EMD	emerin	Xq28	HGNC:3331	2010	ENSG00000102119
EML2	Approved symbol	EML2	echinoderm microtubule associated protein like 2	19q13.32	HGNC:18035	24139	ENSG00000125746
ENDOV	Approved symbol	ENDOV	endonuclease V	17q25.3	HGNC:26640	284131	ENSG00000173818
ENTPD6	Approved symbol	ENTPD6	ectonucleoside triphosphate diphosphohydrolase 6 (putative)	20p11.21	HGNC:3368	955	ENSG00000197586
EPN1	Approved symbol	EPN1	epsin 1	19q13.42	HGNC:21604	29924	ENSG00000063245
EPS15L1	Approved symbol	EPS15L1	epidermal growth factor receptor pathway substrate 15 like 1	19p13.11	HGNC:24634	58513	ENSG00000127527
ERBB2	Approved symbol	ERBB2	erb-b2 receptor tyrosine kinase 2	17q12	HGNC:3430	2064	ENSG00000141736
ERCC2	Approved symbol	ERCC2	ERCC excision repair 2, TFIIH core complex helicase subunit	19q13.32	HGNC:3434	2068	ENSG00000104884
ESRRB	Approved symbol	ESRRB	estrogen related receptor beta	14q24.3	HGNC:3473	2103	ENSG00000119715
EVI5L	Approved symbol	EVI5L	ecotropic viral integration site 5 like	19p13.2	HGNC:30464	115704	ENSG00000142459
EVPL	Approved symbol	EVPL	envoplakin	17q25.1	HGNC:3503	2125	ENSG00000167880
EXOC3	Approved symbol	EXOC3	exocyst complex component 3	5p15.33	HGNC:30378	11336	ENSG00000180104
EXOC4	Approved symbol	EXOC4	exocyst complex component 4	7q33	HGNC:30389	60412	ENSG00000131558
EXOC7	Approved symbol	EXOC7	exocyst complex component 7	17q25.1	HGNC:23214	23265	ENSG00000182473
EXOSC5	Approved symbol	EXOSC5	exosome component 5	19q13.2	HGNC:24662	56915	ENSG00000077348
F8A1	Approved symbol	F8A1	coagulation factor VIII associated 1	Xq28	HGNC:3547	8263	ENSG00000277203
F8A2	Approved symbol	F8A2	coagulation factor VIII associated 2	Xq28	HGNC:31849	474383	ENSG00000274791
F8A3	Approved symbol	F8A3	coagulation factor VIII associated 3	Xq28	HGNC:31850	474384	ENSG00000277150
FAM109A	Previous symbol	PHETA1	PH domain containing endocytic trafficking adaptor 1	12q24.12	HGNC:26509	144717	ENSG00000198324
FAM120A	Approved symbol	FAM120A	family with sequence similarity 120A	9q22.31	HGNC:13247	23196	ENSG00000048828
FAM120AOS	Approved symbol	FAM120AOS	family with sequence similarity 120A opposite strand	9q22.31	HGNC:23389	158293	ENSG00000188938
FAM127C	Previous symbol	RTL8B	retrotransposon Gag like 8B	Xq26.3	HGNC:33156	441518	ENSG00000212747
FAM134A	Previous symbol	RETREG2	reticulophagy regulator family member 2	2q35	HGNC:28450	79137	ENSG00000144567
FAM160B2	Approved symbol	FAM160B2	family with sequence similarity 160 member B2	8p21.3	HGNC:16492	64760	ENSG00000158863
FAM179A	Previous symbol	TOGARAM2	TOG array regulator of axonemal microtubules 2	2p23.2	HGNC:33715	165186	ENSG00000189350
FAM189B	Approved symbol	FAM189B	family with sequence similarity 189 member B	1q22	HGNC:1233	10712	ENSG00000160767
FAM195B	Previous symbol	MCRIP1	MAPK regulated corepressor interacting protein 1	17q25.3	HGNC:28007	348262	ENSG00000225663
FAM204A	Approved symbol	FAM204A	family with sequence similarity 204 member A	10q26.11	HGNC:25794	63877	ENSG00000165669
FAM207A	Approved symbol	FAM207A	family with sequence similarity 207 member A	21q22.3	HGNC:15811	85395	ENSG00000160256
FAM214B	Approved symbol	FAM214B	family with sequence similarity 214 member B	9p13.3	HGNC:25666	80256	ENSG00000005238
FAM220BP	Approved symbol	FAM220BP	family with sequence similarity 220 member B, pseudogene	9p13.1	HGNC:23678	647044	ENSG00000176007
FAM222B	Approved symbol	FAM222B	family with sequence similarity 222 member B	17q11.2	HGNC:25563	55731	ENSG00000173065
FAM49B	Approved symbol	FAM49B	family with sequence similarity 49 member B	8q24.21	HGNC:25216	51571	ENSG00000153310
FAM50A	Approved symbol	FAM50A	family with sequence similarity 50 member A	Xq28	HGNC:18786	9130	ENSG00000071859
FAM53B	Approved symbol	FAM53B	family with sequence similarity 53 member B	10q26.13	HGNC:28968	9679	ENSG00000189319
FAM65A	Previous symbol	RIPOR1	RHO family interacting cell polarization regulator 1	16q22.1	HGNC:25836	79567	ENSG00000039523
FAM86A	Previous symbol	EEF2KMT	eukaryotic elongation factor 2 lysine methyltransferase	16p13.3	HGNC:32221	196483	ENSG00000118894
FAM89B	Approved symbol	FAM89B	family with sequence similarity 89 member B	11q13.1	HGNC:16708	23625	ENSG00000176973
FANCE	Approved symbol	FANCE	Fanconi anemia complementation group E	6p21.31	HGNC:3586	2178	ENSG00000112039
FBL	Approved symbol	FBL	fibrillarin	19q13.2	HGNC:3599	2091	ENSG00000105202
FBXO31	Approved symbol	FBXO31	F-box protein 31	16q24.2	HGNC:16510	79791	ENSG00000103264
FBXW5	Approved symbol	FBXW5	F-box and WD repeat domain containing 5	9q34.3	HGNC:13613	54461	ENSG00000159069
FEN1	Approved symbol	FEN1	flap structure-specific endonuclease 1	11q12.2	HGNC:3650	2237	ENSG00000168496
FIBP	Approved symbol	FIBP	FGF1 intracellular binding protein	11q13.1	HGNC:3705	9158	ENSG00000172500
FIZ1	Approved symbol	FIZ1	FLT3 interacting zinc finger 1	19q13.42	HGNC:25917	84922	ENSG00000179943
FLJ37453	Unmatched
FLOT1	Approved symbol	FLOT1	flotillin 1	6p21.33	HGNC:3757	10211	ENSG00000137312
FLOT2	Approved symbol	FLOT2	flotillin 2	17q11.2	HGNC:3758	2319	ENSG00000132589
FLRT2	Approved symbol	FLRT2	fibronectin leucine rich transmembrane protein 2	14q31.3	HGNC:3761	23768	ENSG00000185070
FLYWCH1	Approved symbol	FLYWCH1	FLYWCH-type zinc finger 1	16p13.3	HGNC:25404	84256	ENSG00000059122
FN3K	Approved symbol	FN3K	fructosamine 3 kinase	17q25.3	HGNC:24822	64122	ENSG00000167363
FOXK2	Approved symbol	FOXK2	forkhead box K2	17q25.3	HGNC:6036	3607	ENSG00000141568
FOXO6	Approved symbol	FOXO6	forkhead box O6	1p34.2	HGNC:24814	100132074	ENSG00000204060
FPGS	Approved symbol	FPGS	folylpolyglutamate synthase	9q34.11	HGNC:3824	2356	ENSG00000136877
FRZB	Approved symbol	FRZB	frizzled related protein	2q32.1	HGNC:3959	2487	ENSG00000162998
FTSJ1	Approved symbol	FTSJ1	FtsJ RNA methyltransferase homolog 1	Xp11.23	HGNC:13254	24140	ENSG00000068438
FTSJ3	Approved symbol	FTSJ3	FtsJ RNA methyltransferase homolog 3	17q23.3	HGNC:17136	117246	ENSG00000108592
FURIN	Approved symbol	FURIN	furin, paired basic amino acid cleaving enzyme	15q26.1	HGNC:8568	5045	ENSG00000140564
FZD9	Approved symbol	FZD9	frizzled class receptor 9	7q11.23	HGNC:4047	8326	ENSG00000188763
G6PC3	Approved symbol	G6PC3	glucose-6-phosphatase catalytic subunit 3	17q21.31	HGNC:24861	92579	ENSG00000141349
GAA	Approved symbol	GAA	glucosidase alpha, acid	17q25.3	HGNC:4065	2548	ENSG00000171298
GALNT2	Approved symbol	GALNT2	polypeptide N-acetylgalactosaminyltransferase 2	1q42.13	HGNC:4124	2590	ENSG00000143641
GARS	Approved symbol	GARS	glycyl-tRNA synthetase	7p14.3	HGNC:4162	2617	ENSG00000106105
GART	Approved symbol	GART	phosphoribosylglycinamide formyltransferase, phosphoribosylglycinamide synthetase, phosphoribosylaminoimidazole synthetase	21q22.11	HGNC:4163	2618	ENSG00000159131
GAS6	Approved symbol	GAS6	growth arrest specific 6	13q34	HGNC:4168	2621	ENSG00000183087
GATS	Previous symbol	CASTOR3	CASTOR family member 3	7q22.1	HGNC:29954	352954	ENSG00000239521
GBE1	Approved symbol	GBE1	1,4-alpha-glucan branching enzyme 1	3p12.2	HGNC:4180	2632	ENSG00000114480
GBP2	Approved symbol	GBP2	guanylate binding protein 2	1p22.2	HGNC:4183	2634	ENSG00000162645
GDF11	Approved symbol	GDF11	growth differentiation factor 11	12q13.2	HGNC:4216	10220	ENSG00000135414
GDI2	Approved symbol	GDI2	GDP dissociation inhibitor 2	10p15.1	HGNC:4227	2665	ENSG00000057608
GET4	Approved symbol	GET4	golgi to ER traffic protein 4	7p22.3	HGNC:21690	51608	ENSG00000239857
GGA1	Approved symbol	GGA1	golgi associated, gamma adaptin ear containing, ARF binding protein 1	22q13.1	HGNC:17842	26088	ENSG00000100083
GINS2	Approved symbol	GINS2	GINS complex subunit 2	16q24.1	HGNC:24575	51659	ENSG00000131153
GLT1D1	Approved symbol	GLT1D1	glycosyltransferase 1 domain containing 1	12q24.33	HGNC:26483	144423	ENSG00000151948
GLTP	Approved symbol	GLTP	glycolipid transfer protein	12q24.11	HGNC:24867	51228	ENSG00000139433
GLTSCR2	Previous symbol	NOP53	NOP53 ribosome biogenesis factor	19q13.33	HGNC:4333	29997	ENSG00000105373
GMPPA	Approved symbol	GMPPA	GDP-mannose pyrophosphorylase A	2q35	HGNC:22923	29926	ENSG00000144591
GMPPB	Approved symbol	GMPPB	GDP-mannose pyrophosphorylase B	3p21.31	HGNC:22932	29925	ENSG00000173540
GNA11	Approved symbol	GNA11	G protein subunit alpha 11	19p13.3	HGNC:4379	2767	ENSG00000088256
GNAS	Approved symbol	GNAS	GNAS complex locus	20q13.32	HGNC:4392	2778	ENSG00000087460
GNB1L	Approved symbol	GNB1L	G protein subunit beta 1 like	22q11.21	HGNC:4397	54584	ENSG00000185838
GNB2	Approved symbol	GNB2	G protein subunit beta 2	7q22.1	HGNC:4398	2783	ENSG00000172354
GNPDA2	Approved symbol	GNPDA2	glucosamine-6-phosphate deaminase 2	4p12	HGNC:21526	132789	ENSG00000163281
GNPTG	Approved symbol	GNPTG	N-acetylglucosamine-1-phosphate transferase gamma subunit	16p13.3	HGNC:23026	84572	ENSG00000090581
GOLGA2P7	Approved symbol	GOLGA2P7	golgin A2 pseudogene 7	15q25.2	HGNC:49516	388152	ENSG00000225151
GPAA1	Approved symbol	GPAA1	glycosylphosphatidylinositol anchor attachment 1	8q24.3	HGNC:4446	8733	ENSG00000197858
GPATCH4	Approved symbol	GPATCH4	G-patch domain containing 4	1q22-q23.1	HGNC:25982	54865	ENSG00000160818
GPC1	Approved symbol	GPC1	glypican 1	2q37.3	HGNC:4449	2817	ENSG00000063660
GPC4	Approved symbol	GPC4	glypican 4	Xq26.2	HGNC:4452	2239	ENSG00000076716
GPR107	Approved symbol	GPR107	G protein-coupled receptor 107	9q34.11	HGNC:17830	57720	ENSG00000148358
GPR137	Approved symbol	GPR137	G protein-coupled receptor 137	11q13.1	HGNC:24300	56834	ENSG00000173264
GPS2	Approved symbol	GPS2	G protein pathway suppressor 2	17p13.1	HGNC:4550	2874	ENSG00000132522
GRAMD1A	Approved symbol	GRAMD1A	GRAM domain containing 1A	19q13.11	HGNC:29305	57655	ENSG00000089351
GRAMD1B	Approved symbol	GRAMD1B	GRAM domain containing 1B	11q24.1	HGNC:29214	57476	ENSG00000023171
GRINA	Approved symbol	GRINA	glutamate ionotropic receptor NMDA type subunit associated protein 1	8q24.3	HGNC:4589	2907	ENSG00000178719
GRN	Approved symbol	GRN	granulin precursor	17q21.31	HGNC:4601	2896	ENSG00000030582
GSE1	Approved symbol	GSE1	Gse1 coiled-coil protein	16q24.1	HGNC:28979	23199	ENSG00000131149
GSK3A	Approved symbol	GSK3A	glycogen synthase kinase 3 alpha	19q13.2	HGNC:4616	2931	ENSG00000105723
GSR	Approved symbol	GSR	glutathione-disulfide reductase	8p12	HGNC:4623	2936	ENSG00000104687
GSS	Approved symbol	GSS	glutathione synthetase	20q11.22	HGNC:4624	2937	ENSG00000100983
GTPBP2	Approved symbol	GTPBP2	GTP binding protein 2	6p21.1	HGNC:4670	54676	ENSG00000172432
GTPBP3	Approved symbol	GTPBP3	GTP binding protein 3, mitochondrial	19p13.11	HGNC:14880	84705	ENSG00000130299
H19	Approved symbol	H19	H19, imprinted maternally expressed transcript (non-protein coding)	11p15.5	HGNC:4713	283120	ENSG00000130600
H2AFJ	Approved symbol	H2AFJ	H2A histone family member J	12p12.3	HGNC:14456	55766	ENSG00000246705
H2AFX	Approved symbol	H2AFX	H2A histone family member X	11q23.3	HGNC:4739	3014	ENSG00000188486
H2AFY	Approved symbol	H2AFY	H2A histone family member Y	5q31.1	HGNC:4740	9555	ENSG00000113648
HDAC3	Approved symbol	HDAC3	histone deacetylase 3	5q31.3	HGNC:4854	8841	ENSG00000171720
HDGF	Approved symbol	HDGF	heparin binding growth factor	1q23.1	HGNC:4856	3068	ENSG00000143321
HDGFRP2	Synonyms	HDGFL2	HDGF like 2	19p13.3	HGNC:14680	84717	ENSG00000167674
HEATR2	Previous symbol	DNAAF5	dynein axonemal assembly factor 5	7p22.3	HGNC:26013	54919	ENSG00000164818
HECTD3	Approved symbol	HECTD3	HECT domain E3 ubiquitin protein ligase 3	1p34.1	HGNC:26117	79654	ENSG00000126107
HGS	Approved symbol	HGS	hepatocyte growth factor-regulated tyrosine kinase substrate	17q25.3	HGNC:4897	9146	ENSG00000185359
HIST1H2AC	Approved symbol	HIST1H2AC	histone cluster 1 H2A family member c	6p22.2	HGNC:4733	8334	ENSG00000180573
HIST2H2AA3	Approved symbol	HIST2H2AA3	histone cluster 2 H2A family member a3	1q21.2	HGNC:4736	8337	ENSG00000203812
HIST2H2AA4	Approved symbol	HIST2H2AA4	histone cluster 2 H2A family member a4	1q21.2	HGNC:29668	723790	ENSG00000272196
HIST2H2BE	Approved symbol	HIST2H2BE	histone cluster 2 H2B family member e	1q21.2	HGNC:4760	8349	ENSG00000184678
HK1	Approved symbol	HK1	hexokinase 1	10q22.1	HGNC:4922	3098	ENSG00000156515
HM13	Approved symbol	HM13	histocompatibility minor 13	20q11.21	HGNC:16435	81502	ENSG00000101294
HMCES	Approved symbol	HMCES	5-hydroxymethylcytosine binding, ES cell specific	3q21.3	HGNC:24446	56941	ENSG00000183624
HMG20B	Approved symbol	HMG20B	high mobility group 20B	19p13.3	HGNC:5002	10362	ENSG00000064961
HMGN2	Approved symbol	HMGN2	high mobility group nucleosomal binding domain 2	1p36.11	HGNC:4986	3151	ENSG00000198830
HMGN3-AS1	Approved symbol	HMGN3-AS1	HMGN3 antisense RNA 1	6q14.1	HGNC:48984	100288198	ENSG00000270362
HN1	Previous symbol	JPT1	Jupiter microtubule associated homolog 1	17q25.1	HGNC:14569	51155	ENSG00000189159
HN1L	Previous symbol	JPT2	Jupiter microtubule associated homolog 2	16p13.3	HGNC:14137	90861	ENSG00000206053
HNRNPA1P10	Approved symbol	HNRNPA1P10	heterogeneous nuclear ribonucleoprotein A1 pseudogene 10	19p13.2	HGNC:39128	664709	ENSG00000214223
HNRNPCL1	Approved symbol	HNRNPCL1	heterogeneous nuclear ribonucleoprotein C-like 1	1p36.21	HGNC:29295	343069	ENSG00000179172
HNRNPF	Approved symbol	HNRNPF	heterogeneous nuclear ribonucleoprotein F	10q11.21	HGNC:5039	3185	ENSG00000169813
HOMER3	Approved symbol	HOMER3	homer scaffold protein 3	19p13.11	HGNC:17514	9454	ENSG00000051128
HPS1	Approved symbol	HPS1	HPS1, biogenesis of lysosomal organelles complex 3 subunit 1	10q24.2	HGNC:5163	3257	ENSG00000107521
HRC	Approved symbol	HRC	histidine rich calcium binding protein	19q13.33	HGNC:5178	3270	ENSG00000130528
HS1BP3	Approved symbol	HS1BP3	HCLS1 binding protein 3	2p24.1	HGNC:24979	64342	ENSG00000118960
HSD17B8	Approved symbol	HSD17B8	hydroxysteroid 17-beta dehydrogenase 8	6p21.32	HGNC:3554	7923	ENSG00000204228
HTATSF1P2	Approved symbol	HTATSF1P2	HIV-1 Tat specific factor 1 pseudogene 2	6p25.2	HGNC:38586	401233	ENSG00000271361
HTRA2	Approved symbol	HTRA2	HtrA serine peptidase 2	2p13.1	HGNC:14348	27429	ENSG00000115317
IGHMBP2	Approved symbol	IGHMBP2	immunoglobulin mu binding protein 2	11q13.3	HGNC:5542	3508	ENSG00000132740
IL13RA1	Approved symbol	IL13RA1	interleukin 13 receptor subunit alpha 1	Xq24	HGNC:5974	3597	ENSG00000131724
IL17RC	Approved symbol	IL17RC	interleukin 17 receptor C	3p25.3	HGNC:18358	84818	ENSG00000163702
ILF3	Approved symbol	ILF3	interleukin enhancer binding factor 3	19p13.2	HGNC:6038	3609	ENSG00000129351
ILF3-AS1	Approved symbol	ILF3-AS1	ILF3 antisense RNA 1 (head to head)	19p13.2	HGNC:27115	147727	ENSG00000267100
ILVBL	Approved symbol	ILVBL	ilvB acetolactate synthase like	19p13.12	HGNC:6041	10994	ENSG00000105135
IMPACT	Approved symbol	IMPACT	impact RWD domain protein	18q11.2	HGNC:20387	55364	ENSG00000154059
IMPDH2	Approved symbol	IMPDH2	inosine monophosphate dehydrogenase 2	3p21.31	HGNC:6053	3615	ENSG00000178035
INHBB	Approved symbol	INHBB	inhibin beta B subunit	2q14.2	HGNC:6067	3625	ENSG00000163083
INPP5K	Approved symbol	INPP5K	inositol polyphosphate-5-phosphatase K	17p13.3	HGNC:33882	51763	ENSG00000132376
INPPL1	Approved symbol	INPPL1	inositol polyphosphate phosphatase like 1	11q13.4	HGNC:6080	3636	ENSG00000165458
IPO13	Approved symbol	IPO13	importin 13	1p34.1	HGNC:16853	9670	ENSG00000117408
IPO4	Approved symbol	IPO4	importin 4	14q12	HGNC:19426	79711	ENSG00000196497
IPO7	Approved symbol	IPO7	importin 7	11p15.4	HGNC:9852	10527	ENSG00000205339
IQCE	Approved symbol	IQCE	IQ motif containing E	7p22.3	HGNC:29171	23288	ENSG00000106012
IQSEC2	Approved symbol	IQSEC2	IQ motif and Sec7 domain 2	Xp11.22	HGNC:29059	23096	ENSG00000124313
IRAK2	Approved symbol	IRAK2	interleukin 1 receptor associated kinase 2	3p25.3	HGNC:6113	3656	ENSG00000134070
IRF7	Approved symbol	IRF7	interferon regulatory factor 7	11p15.5	HGNC:6122	3665	ENSG00000185507
ITFG3	Previous symbol	FAM234A	family with sequence similarity 234 member A	16p13.3	HGNC:14163	83986	ENSG00000167930
ITPK1	Approved symbol	ITPK1	inositol-tetrakisphosphate 1-kinase	14q32.12	HGNC:6177	3705	ENSG00000100605
JHDM1D-AS1	Approved symbol	JHDM1D-AS1	JHDM1D antisense RNA 1 (head to head)	7q34	HGNC:48959	100134229	ENSG00000260231
JMJD4	Approved symbol	JMJD4	jumonji domain containing 4	1q42.13	HGNC:25724	65094	ENSG00000081692
JMJD8	Approved symbol	JMJD8	jumonji domain containing 8	16p13.3	HGNC:14148	339123	ENSG00000161999
JOSD2	Approved symbol	JOSD2	Josephin domain containing 2	19q13.33	HGNC:28853	126119	ENSG00000161677
JSRP1	Approved symbol	JSRP1	junctional sarcoplasmic reticulum protein 1	19p13.3	HGNC:24963	126306	ENSG00000167476
KATNAL1	Approved symbol	KATNAL1	katanin catalytic subunit A1 like 1	13q12.3	HGNC:28361	84056	ENSG00000102781
KATNB1	Approved symbol	KATNB1	katanin regulatory subunit B1	16q21	HGNC:6217	10300	ENSG00000140854
KCNJ11	Approved symbol	KCNJ11	potassium voltage-gated channel subfamily J member 11	11p15.1	HGNC:6257	3767	ENSG00000187486
KCNMA1	Approved symbol	KCNMA1	potassium calcium-activated channel subfamily M alpha 1	10q22.3	HGNC:6284	3778	ENSG00000156113
KCNT1	Approved symbol	KCNT1	potassium sodium-activated channel subfamily T member 1	9q34.3	HGNC:18865	57582	ENSG00000107147
KCTD2	Approved symbol	KCTD2	potassium channel tetramerization domain containing 2	17q25.1	HGNC:21294	23510	ENSG00000180901
KCTD5	Approved symbol	KCTD5	potassium channel tetramerization domain containing 5	16p13.3	HGNC:21423	54442	ENSG00000167977
KHDRBS3	Approved symbol	KHDRBS3	KH RNA binding domain containing, signal transduction associated 3	8q24.23	HGNC:18117	10656	ENSG00000131773
KIAA0196	Previous symbol	WASHC5	WASH complex subunit 5	8q24.13	HGNC:28984	9897	ENSG00000164961
KIAA0922	Previous symbol	TMEM131L	transmembrane 131 like	4q31.3	HGNC:29146	23240	ENSG00000121210
KIAA1143	Approved symbol	KIAA1143	KIAA1143	3p21.31	HGNC:29198	57456	ENSG00000163807
KIF1C	Approved symbol	KIF1C	kinesin family member 1C	17p13.2	HGNC:6317	10749	ENSG00000129250
KLC1	Approved symbol	KLC1	kinesin light chain 1	14q32.33	HGNC:6387	3831	ENSG00000126214
KLC2	Approved symbol	KLC2	kinesin light chain 2	11q13.2	HGNC:20716	64837	ENSG00000174996
KLHL30	Approved symbol	KLHL30	kelch like family member 30	2q37.3	HGNC:24770	377007	ENSG00000168427
KREMEN1	Approved symbol	KREMEN1	kringle containing transmembrane protein 1	22q12.1	HGNC:17550	83999	ENSG00000183762
KXD1	Approved symbol	KXD1	KxDL motif containing 1	19p13.11	HGNC:28420	79036	ENSG00000105700
LARGE	Previous symbol	LARGE1	LARGE xylosyl- and glucuronyltransferase 1	22q12.3	HGNC:6511	9215	ENSG00000133424
LENG1	Approved symbol	LENG1	leukocyte receptor cluster member 1	19q13.42	HGNC:15502	79165	ENSG00000105617
LEPREL4	Previous symbol	P3H4	prolyl 3-hydroxylase family member 4 (non-enzymatic)	17q21.2	HGNC:16946	10609	ENSG00000141696
LHPP	Approved symbol	LHPP	phospholysine phosphohistidine inorganic pyrophosphate phosphatase	10q26.13	HGNC:30042	64077	ENSG00000107902
LIN54	Approved symbol	LIN54	lin-54 DREAM MuvB core complex component	4q21.22	HGNC:25397	132660	ENSG00000189308
LINC-PINT	Approved symbol	LINC-PINT	long intergenic non-protein coding RNA, p53 induced transcript	7q32.3	HGNC:26885	378805	ENSG00000231721
LINC00984	Previous symbol	INAFM2	InaF motif containing 2	15q15.1	HGNC:35165	100505573	ENSG00000259330
LINC00999	Approved symbol	LINC00999	long intergenic non-protein coding RNA 999	10p11.1	HGNC:38537	399744
LINC01137	Approved symbol	LINC01137	long intergenic non-protein coding RNA 1137	1p34.3	HGNC:49453	728431	ENSG00000233621
LLGL1	Approved symbol	LLGL1	LLGL1, scribble cell polarity complex component	17p11.2	HGNC:6628	3996	ENSG00000131899
LMNB2	Approved symbol	LMNB2	lamin B2	19p13.3	HGNC:6638	84823	ENSG00000176619
LMO2	Approved symbol	LMO2	LIM domain only 2	11p13	HGNC:6642	4005	ENSG00000135363
LNP1	Approved symbol	LNP1	leukemia NUP98 fusion partner 1	3q12.2	HGNC:28014	348801	ENSG00000206535
LOC100132831	Unmatched
LOC100287896	Unmatched
LOC100499489	Unmatched
LOC100506548	Unmatched
LOC100506922	Unmatched
LOC100996696	Unmatched
LOC101060179	Unmatched
LOC101927663	Unmatched
LOC101928126	Unmatched
LOC101928498	Unmatched
LOC102723728	Unmatched
LOC102724135	Unmatched
LOC102724200	Unmatched
LOC102724528	Unmatched
LOC102724852	Unmatched
LOC102724967	Unmatched
LOC145783	Unmatched
LOC148413	Unmatched
LOC341056	Unmatched
LOC388499	Unmatched
LOC401127	Unmatched
LOC401480	Unmatched
LOC439994	Unmatched
LOC440311	Unmatched
LOC653653	Unmatched
LOC729451	Unmatched
LOC90784	Unmatched
LOH12CR1	Previous symbol	BORCS5	BLOC-1 related complex subunit 5	12p13.2	HGNC:17950	118426	ENSG00000165714
LRFN3	Approved symbol	LRFN3	leucine rich repeat and fibronectin type III domain containing 3	19q13.13	HGNC:28370	79414	ENSG00000126243
LRFN4	Approved symbol	LRFN4	leucine rich repeat and fibronectin type III domain containing 4	11q13.1	HGNC:28456	78999	ENSG00000173621
LRP3	Approved symbol	LRP3	LDL receptor related protein 3	19q13.11	HGNC:6695	4037	ENSG00000130881
LRPAP1	Approved symbol	LRPAP1	LDL receptor related protein associated protein 1	4p16.3	HGNC:6701	4043	ENSG00000163956
LRRC38	Approved symbol	LRRC38	leucine rich repeat containing 38	1p36.21	HGNC:27005	126755	ENSG00000162494
LRRC56	Approved symbol	LRRC56	leucine rich repeat containing 56	11p15.5	HGNC:25430	115399	ENSG00000161328
LRWD1	Approved symbol	LRWD1	leucine rich repeats and WD repeat domain containing 1	7q22.1	HGNC:21769	222229	ENSG00000161036
LSM12	Approved symbol	LSM12	LSM12 homolog	17q21.31	HGNC:26407	124801	ENSG00000161654
LSS	Approved symbol	LSS	lanosterol synthase	21q22.3	HGNC:6708	4047	ENSG00000160285
LYNX1	Approved symbol	LYNX1	Ly6/neurotoxin 1	8q24.3	HGNC:29604	66004	ENSG00000180155
LYPLA2	Approved symbol	LYPLA2	lysophospholipase II	1p36.11	HGNC:6738	11313	ENSG00000011009
LYRM9	Approved symbol	LYRM9	LYR motif containing 9	17q11.2	HGNC:27314	201229	ENSG00000232859
MAD1L1	Approved symbol	MAD1L1	mitotic arrest deficient 1 like 1	7p22.3	HGNC:6762	8379	ENSG00000002822
MAD2L2	Approved symbol	MAD2L2	mitotic arrest deficient 2 like 2	1p36.22	HGNC:6764	10459	ENSG00000116670
MAGED1	Approved symbol	MAGED1	MAGE family member D1	Xp11.22	HGNC:6813	9500	ENSG00000179222
MAGED2	Approved symbol	MAGED2	MAGE family member D2	Xp11.21	HGNC:16353	10916	ENSG00000102316
MAN1B1-AS1	Approved symbol	MAN1B1-AS1	MAN1B1 antisense RNA 1 (head to head)	9q34.3	HGNC:48715	100289341	ENSG00000268996
MANEAL	Approved symbol	MANEAL	mannosidase endo-alpha like	1p34.3	HGNC:26452	149175	ENSG00000185090
MAP2K5	Approved symbol	MAP2K5	mitogen-activated protein kinase kinase 5	15q23	HGNC:6845	5607	ENSG00000137764
MAP3K7	Approved symbol	MAP3K7	mitogen-activated protein kinase kinase kinase 7	6q15	HGNC:6859	6885	ENSG00000135341
MAP4K4	Approved symbol	MAP4K4	mitogen-activated protein kinase kinase kinase kinase 4	2q11.2	HGNC:6866	9448	ENSG00000071054
MAP7D1	Approved symbol	MAP7D1	MAP7 domain containing 1	1p34.3	HGNC:25514	55700	ENSG00000116871
MAPK8IP1	Approved symbol	MAPK8IP1	mitogen-activated protein kinase 8 interacting protein 1	11p11.2	HGNC:6882	9479	ENSG00000121653
MAPKAPK3	Approved symbol	MAPKAPK3	mitogen-activated protein kinase-activated protein kinase 3	3p21.2	HGNC:6888	7867	ENSG00000114738
MAPRE3	Approved symbol	MAPRE3	microtubule associated protein RP/EB family member 3	2p23.3	HGNC:6892	22924	ENSG00000084764
MAPT	Approved symbol	MAPT	microtubule associated protein tau	17q21.31	HGNC:6893	4137	ENSG00000186868
MARCH9	Approved symbol	MARCH9	membrane associated ring-CH-type finger 9	12q14.1	HGNC:25139	92979	ENSG00000139266
MARK3	Approved symbol	MARK3	microtubule affinity regulating kinase 3	14q32.32-q32.33	HGNC:6897	4140	ENSG00000075413
MARK4	Approved symbol	MARK4	microtubule affinity regulating kinase 4	19q13.32	HGNC:13538	57787	ENSG00000007047
MAZ	Approved symbol	MAZ	MYC associated zinc finger protein	16p11.2	HGNC:6914	4150	ENSG00000103495
MBD1	Approved symbol	MBD1	methyl-CpG binding domain protein 1	18q21.1	HGNC:6916	4152	ENSG00000141644
MBD2	Approved symbol	MBD2	methyl-CpG binding domain protein 2	18q21.2	HGNC:6917	8932	ENSG00000134046
MBD5	Approved symbol	MBD5	methyl-CpG binding domain protein 5	2q23.2	HGNC:20444	55777	ENSG00000204406
MCAT	Approved symbol	MCAT	malonyl-CoA-acyl carrier protein transacylase	22q13.2	HGNC:29622	27349	ENSG00000100294
MCOLN1	Approved symbol	MCOLN1	mucolipin 1	19p13.2	HGNC:13356	57192	ENSG00000090674
MCU	Approved symbol	MCU	mitochondrial calcium uniporter	10q22.1	HGNC:23526	90550	ENSG00000156026
ME1	Approved symbol	ME1	malic enzyme 1	6q14.2	HGNC:6983	4199	ENSG00000065833
MED16	Approved symbol	MED16	mediator complex subunit 16	19p13.3	HGNC:17556	10025	ENSG00000175221
MED24	Approved symbol	MED24	mediator complex subunit 24	17q21.1	HGNC:22963	9862	ENSG00000008838
MED26	Approved symbol	MED26	mediator complex subunit 26	19p13.11	HGNC:2376	9441	ENSG00000105085
MED27	Approved symbol	MED27	mediator complex subunit 27	9q34.13	HGNC:2377	9442	ENSG00000160563
MEF2C	Approved symbol	MEF2C	myocyte enhancer factor 2C	5q14.3	HGNC:6996	4208	ENSG00000081189
MICALL1	Approved symbol	MICALL1	MICAL like 1	22q13.1	HGNC:29804	85377	ENSG00000100139
MICU1	Approved symbol	MICU1	mitochondrial calcium uptake 1	10q22.1	HGNC:1530	10367	ENSG00000107745
MIER2	Approved symbol	MIER2	MIER family member 2	19p13.3	HGNC:29210	54531	ENSG00000105556
MIIP	Approved symbol	MIIP	migration and invasion inhibitory protein	1p36.22	HGNC:25715	60672	ENSG00000116691
MINA	Previous symbol	RIOX2	ribosomal oxygenase 2	3q11.2	HGNC:19441	84864	ENSG00000170854
MIR6087	Approved symbol	MIR6087	microRNA 6087	Xq22.3	HGNC:50045	102464835	ENSG00000275110
MKRN9P	Approved symbol	MKRN9P	makorin ring finger protein 9, pseudogene	12q21.32	HGNC:7116	400058	ENSG00000258128
MLF2	Approved symbol	MLF2	myeloid leukemia factor 2	12p13.31	HGNC:7126	8079	ENSG00000089693
MLLT1	Approved symbol	MLLT1	MLLT1, super elongation complex subunit	19p13.3	HGNC:7134	4298	ENSG00000130382
MLLT11	Approved symbol	MLLT11	MLLT11, transcription factor 7 cofactor	1q21.3	HGNC:16997	10962	ENSG00000213190
MMP15	Approved symbol	MMP15	matrix metallopeptidase 15	16q21	HGNC:7161	4324	ENSG00000102996
MMP24-AS1	Previous symbol	MMP24OS	MMP24 opposite strand	20q11.22	HGNC:44421	101410538	ENSG00000126005
MMS19	Approved symbol	MMS19	MMS19 homolog, cytosolic iron-sulfur assembly component	10q24.1	HGNC:13824	64210	ENSG00000155229
MOSPD3	Approved symbol	MOSPD3	motile sperm domain containing 3	7q22.1	HGNC:25078	64598	ENSG00000106330
MPPE1	Approved symbol	MPPE1	metallophosphoesterase 1	18p11.21	HGNC:15988	65258	ENSG00000154889
MPV17L2	Approved symbol	MPV17L2	MPV17 mitochondrial inner membrane protein like 2	19p13.11	HGNC:28177	84769	ENSG00000254858
MROH1	Approved symbol	MROH1	maestro heat like repeat family member 1	8q24.3	HGNC:26958	727957	ENSG00000179832
MSRA	Approved symbol	MSRA	methionine sulfoxide reductase A	8p23.1	HGNC:7377	4482	ENSG00000175806
MSX2	Approved symbol	MSX2	msh homeobox 2	5q35.2	HGNC:7392	4488	ENSG00000120149
MTA1	Approved symbol	MTA1	metastasis associated 1	14q32.33	HGNC:7410	9112	ENSG00000182979
MTCH1	Approved symbol	MTCH1	mitochondrial carrier 1	6p21.2	HGNC:17586	23787	ENSG00000137409
MTG2	Approved symbol	MTG2	mitochondrial ribosome associated GTPase 2	20q13.33	HGNC:16239	26164	ENSG00000101181
MTSS1L	Approved symbol	MTSS1L	MTSS1L, I-BAR domain containing	16q22.1	HGNC:25094	92154	ENSG00000132613
MUS81	Approved symbol	MUS81	MUS81 structure-specific endonuclease subunit	11q13	HGNC:29814	80198	ENSG00000172732
MVB12A	Approved symbol	MVB12A	multivesicular body subunit 12A	19p13.11	HGNC:25153	93343	ENSG00000141971
MVD	Approved symbol	MVD	mevalonate diphosphate decarboxylase	16q24.2	HGNC:7529	4597	ENSG00000167508
MVK	Approved symbol	MVK	mevalonate kinase	12q24.11	HGNC:7530	4598	ENSG00000110921
MYADML2	Approved symbol	MYADML2	myeloid associated differentiation marker like 2	17q25.3	HGNC:34548	255275	ENSG00000185105
MYBBP1A	Approved symbol	MYBBP1A	MYB binding protein 1a	17p13.2	HGNC:7546	10514	ENSG00000132382
MYH14	Approved symbol	MYH14	myosin heavy chain 14	19q13.33	HGNC:23212	79784	ENSG00000105357
MYOD1	Approved symbol	MYOD1	myogenic differentiation 1	11p15.1	HGNC:7611	4654	ENSG00000129152
MYOM3	Approved symbol	MYOM3	myomesin 3	1p36.11	HGNC:26679	127294	ENSG00000142661
NAA60	Approved symbol	NAA60	N(alpha)-acetyltransferase 60, NatF catalytic subunit	16p13.3	HGNC:25875	79903	ENSG00000122390
NACC1	Approved symbol	NACC1	nucleus accumbens associated 1	19p13.13	HGNC:20967	112939	ENSG00000160877
NAPA	Approved symbol	NAPA	NSF attachment protein alpha	19q13.33	HGNC:7641	8775	ENSG00000105402
NAPRT1	Previous symbol	NAPRT	nicotinate phosphoribosyltransferase	8q24.3	HGNC:30450	93100	ENSG00000147813
NCAPH2	Approved symbol	NCAPH2	non-SMC condensin II complex subunit H2	22q13.33	HGNC:25071	29781	ENSG00000025770
NCDN	Approved symbol	NCDN	neurochondrin	1p34.3	HGNC:17597	23154	ENSG00000020129
NCKAP5L	Approved symbol	NCKAP5L	NCK associated protein 5 like	12q13.12	HGNC:29321	57701	ENSG00000167566
NCLN	Approved symbol	NCLN	nicalin	19p13.3	HGNC:26923	56926	ENSG00000125912
NDST1	Approved symbol	NDST1	N-deacetylase and N-sulfotransferase 1	5q33.1	HGNC:7680	3340	ENSG00000070614
NELFB	Approved symbol	NELFB	negative elongation factor complex member B	9q34.3	HGNC:24324	25920	ENSG00000188986
NES	Approved symbol	NES	nestin	1q23.1	HGNC:7756	10763	ENSG00000132688
NEURL4	Approved symbol	NEURL4	neuralized E3 ubiquitin protein ligase 4	17p13.1	HGNC:34410	84461	ENSG00000215041
NF2	Approved symbol	NF2	neurofibromin 2	22q12.2	HGNC:7773	4771	ENSG00000186575
NFE2L1	Approved symbol	NFE2L1	nuclear factor, erythroid 2 like 1	17q21.3	HGNC:7781	4779	ENSG00000082641
NFKBIB	Approved symbol	NFKBIB	NFKB inhibitor beta	19q13.1	HGNC:7798	4793	ENSG00000104825
NFKBIE	Approved symbol	NFKBIE	NFKB inhibitor epsilon	6p21.1	HGNC:7799	4794	ENSG00000146232
NFKBIL1	Approved symbol	NFKBIL1	NFKB inhibitor like 1	6p21.33	HGNC:7800	4795	ENSG00000204498
NHEJ1	Approved symbol	NHEJ1	non-homologous end joining factor 1	2q35	HGNC:25737	79840	ENSG00000187736
NHLRC1	Approved symbol	NHLRC1	NHL repeat containing E3 ubiquitin protein ligase 1	6p22.3	HGNC:21576	378884	ENSG00000187566
NINJ2	Approved symbol	NINJ2	ninjurin 2	12p13.33	HGNC:7825	4815	ENSG00000171840
NLE1	Approved symbol	NLE1	notchless homolog 1	17q12	HGNC:19889	54475	ENSG00000073536
NMT1	Approved symbol	NMT1	N-myristoyltransferase 1	17q21.31	HGNC:7857	4836	ENSG00000136448
NNMT	Approved symbol	NNMT	nicotinamide N-methyltransferase	11q23.1	HGNC:7861	4837	ENSG00000166741
NOA1	Approved symbol	NOA1	nitric oxide associated 1	4q12	HGNC:28473	84273	ENSG00000084092
NOC2L	Approved symbol	NOC2L	NOC2 like nucleolar associated transcriptional repressor	1p36.33	HGNC:24517	26155	ENSG00000188976
NOC4L	Approved symbol	NOC4L	nucleolar complex associated 4 homolog	12q24.33	HGNC:28461	79050	ENSG00000184967
NOMO1	Approved symbol	NOMO1	NODAL modulator 1	16p13.11	HGNC:30060	23420	ENSG00000103512
NOMO2	Approved symbol	NOMO2	NODAL modulator 2	16p12.3	HGNC:22652	283820	ENSG00000185164
NOMO3	Approved symbol	NOMO3	NODAL modulator 3	16p13.11	HGNC:25242	408050	ENSG00000103226
NPLOC4	Approved symbol	NPLOC4	NPL4 homolog, ubiquitin recognition factor	17q25.3	HGNC:18261	55666	ENSG00000182446
NR1H2	Approved symbol	NR1H2	nuclear receptor subfamily 1 group H member 2	19q13.3	HGNC:7965	7376	ENSG00000131408
NRBP1	Approved symbol	NRBP1	nuclear receptor binding protein 1	2p23.3	HGNC:7993	29959	ENSG00000115216
NSFL1C	Approved symbol	NSFL1C	NSFL1 cofactor	20p13	HGNC:15912	55968	ENSG00000088833
NUCB1	Approved symbol	NUCB1	nucleobindin 1	19q13.33	HGNC:8043	4924	ENSG00000104805
NUDT14	Approved symbol	NUDT14	nudix hydrolase 14	14q32.33	HGNC:20141	256281	ENSG00000183828
NUP88	Approved symbol	NUP88	nucleoporin 88	17p13.2	HGNC:8067	4927	ENSG00000108559
NUPR1	Approved symbol	NUPR1	nuclear protein 1, transcriptional regulator	16p11.2	HGNC:29990	26471	ENSG00000176046
NUTM2B	Approved symbol	NUTM2B	NUT family member 2B	10q22.3	HGNC:23445	729262	ENSG00000188199
OBFC1	Previous symbol	STN1	STN1, CST complex subunit	10q24.33	HGNC:26200	79991	ENSG00000107960
OGFOD3	Approved symbol	OGFOD3	2-oxoglutarate and iron dependent oxygenase domain containing 3	17q25.3	HGNC:26174	79701	ENSG00000181396
OGFR	Approved symbol	OGFR	opioid growth factor receptor	20q13.33	HGNC:15768	11054	ENSG00000060491
OPA3	Approved symbol	OPA3	OPA3, outer mitochondrial membrane lipid metabolism regulator	19q13.32	HGNC:8142	80207	ENSG00000125741
OTUB1	Approved symbol	OTUB1	OTU deubiquitinase, ubiquitin aldehyde binding 1	11q13.1	HGNC:23077	55611	ENSG00000167770
PA2G4	Approved symbol	PA2G4	proliferation-associated 2G4	12q13.2	HGNC:8550	5036	ENSG00000170515
PA2G4P4	Approved symbol	PA2G4P4	proliferation-associated 2G4 pseudogene 4	3q25.31	HGNC:32217	647033	ENSG00000230457
PABPC4	Approved symbol	PABPC4	poly(A) binding protein cytoplasmic 4	1p34.3	HGNC:8557	8761	ENSG00000090621
PACS1	Approved symbol	PACS1	phosphofurin acidic cluster sorting protein 1	11q13.1-q13.2	HGNC:30032	55690	ENSG00000175115
PACS2	Approved symbol	PACS2	phosphofurin acidic cluster sorting protein 2	14q32.33	HGNC:23794	23241	ENSG00000179364
PACSIN3	Approved symbol	PACSIN3	protein kinase C and casein kinase substrate in neurons 3	11p11.2	HGNC:8572	29763	ENSG00000165912
PADI2	Approved symbol	PADI2	peptidyl arginine deiminase 2	1p36.13	HGNC:18341	11240	ENSG00000117115
PAFAH1B3	Approved symbol	PAFAH1B3	platelet activating factor acetylhydrolase 1b catalytic subunit 3	19q13.1	HGNC:8576	5050	ENSG00000079462
PAK4	Approved symbol	PAK4	p21 (RAC1) activated kinase 4	19q13.2	HGNC:16059	10298	ENSG00000130669
PAK6	Approved symbol	PAK6	p21 (RAC1) activated kinase 6	15q15.1	HGNC:16061	56924	ENSG00000137843
PBLD	Approved symbol	PBLD	phenazine biosynthesis like protein domain containing	10q21.3	HGNC:23301	64081	ENSG00000108187
PBX2	Approved symbol	PBX2	PBX homeobox 2	6p21.32	HGNC:8633	5089	ENSG00000204304
PC	Approved symbol	PC	pyruvate carboxylase	11q13.2	HGNC:8636	5091	ENSG00000173599
PCGF6	Approved symbol	PCGF6	polycomb group ring finger 6	10q24.33	HGNC:21156	84108	ENSG00000156374
PDAP1	Approved symbol	PDAP1	PDGFA associated protein 1	7q22.1	HGNC:14634	11333	ENSG00000106244
PDCD2L	Approved symbol	PDCD2L	programmed cell death 2 like	19q13.11	HGNC:28194	84306	ENSG00000126249
PDF	Approved symbol	PDF	peptide deformylase, mitochondrial	16q22.1	HGNC:30012	64146	ENSG00000258429
PDIA6	Approved symbol	PDIA6	protein disulfide isomerase family A member 6	2p25.1	HGNC:30168	10130	ENSG00000143870
PDLIM7	Approved symbol	PDLIM7	PDZ and LIM domain 7	5q35.3	HGNC:22958	9260	ENSG00000196923
PEMT	Approved symbol	PEMT	phosphatidylethanolamine N-methyltransferase	17p11.2	HGNC:8830	10400	ENSG00000133027
PEPD	Approved symbol	PEPD	peptidase D	19q13.11	HGNC:8840	5184	ENSG00000124299
PEX10	Approved symbol	PEX10	peroxisomal biogenesis factor 10	1p36.32	HGNC:8851	5192	ENSG00000157911
PEX16	Approved symbol	PEX16	peroxisomal biogenesis factor 16	11p11.2	HGNC:8857	9409	ENSG00000121680
PEX5	Approved symbol	PEX5	peroxisomal biogenesis factor 5	12p13.31	HGNC:9719	5830	ENSG00000139197
PGAM5	Approved symbol	PGAM5	PGAM family member 5, mitochondrial serine/threonine protein phosphatase	12q24.33	HGNC:28763	192111	ENSG00000247077
PHF19	Approved symbol	PHF19	PHD finger protein 19	9q33.2	HGNC:24566	26147	ENSG00000119403
PHLDA3	Approved symbol	PHLDA3	pleckstrin homology like domain family A member 3	1q32.1	HGNC:8934	23612	ENSG00000174307
PICK1	Approved symbol	PICK1	protein interacting with PRKCA 1	22q13.1	HGNC:9394	9463	ENSG00000100151
PIGQ	Approved symbol	PIGQ	phosphatidylinositol glycan anchor biosynthesis class Q	16p13.3	HGNC:14135	9091	ENSG00000007541
PIGT	Approved symbol	PIGT	phosphatidylinositol glycan anchor biosynthesis class T	20q13.12	HGNC:14938	51604	ENSG00000124155
PIK3R2	Approved symbol	PIK3R2	phosphoinositide-3-kinase regulatory subunit 2	19p13.11	HGNC:8980	5296	ENSG00000105647
PIM3	Approved symbol	PIM3	Pim-3 proto-oncogene, serine/threonine kinase	22q13.33	HGNC:19310	415116	ENSG00000198355
PIN1P1	Approved symbol	PIN1P1	peptidylprolyl cis/trans isomerase, NIMA-interacting 1 pseudogene 1	1p31.1	HGNC:8989	5301	ENSG00000229359
PKNOX2	Approved symbol	PKNOX2	PBX/knotted 1 homeobox 2	11q24.2	HGNC:16714	63876	ENSG00000165495
PLA2G16	Approved symbol	PLA2G16	phospholipase A2 group XVI	11q12.3-q13.1	HGNC:17825	11145	ENSG00000176485
PLA2G4C	Approved symbol	PLA2G4C	phospholipase A2 group IVC	19q13.33	HGNC:9037	8605	ENSG00000105499
PLA2G4F	Approved symbol	PLA2G4F	phospholipase A2 group IVF	15q15.1	HGNC:27396	255189	ENSG00000168907
PLBD2	Approved symbol	PLBD2	phospholipase B domain containing 2	12q24.13	HGNC:27283	196463	ENSG00000151176
PLCD3	Approved symbol	PLCD3	phospholipase C delta 3	17q21.31	HGNC:9061	113026	ENSG00000161714
PLEKHM2	Approved symbol	PLEKHM2	pleckstrin homology and RUN domain containing M2	1p36.21	HGNC:29131	23207	ENSG00000116786
PLIN3	Approved symbol	PLIN3	perilipin 3	19p13.3	HGNC:16893	10226	ENSG00000105355
PLK1S1	Previous symbol	KIZ	kizuna centrosomal protein	20p11.23	HGNC:15865	55857	ENSG00000088970
PLXNA1	Approved symbol	PLXNA1	plexin A1	3q21.3	HGNC:9099	5361	ENSG00000114554
PMS2P1	Approved symbol	PMS2P1	PMS1 homolog 2, mismatch repair system component pseudogene 1	7q22.1	HGNC:9123	5379	ENSG00000078319
PNKP	Approved symbol	PNKP	polynucleotide kinase 3'-phosphatase	19q13.33	HGNC:9154	11284	ENSG00000039650
PNPLA6	Approved symbol	PNPLA6	patatin like phospholipase domain containing 6	19p13.2	HGNC:16268	10908	ENSG00000032444
PODXL2	Approved symbol	PODXL2	podocalyxin like 2	3q21.3	HGNC:17936	50512	ENSG00000114631
POFUT1	Approved symbol	POFUT1	protein O-fucosyltransferase 1	20q11.21	HGNC:14988	23509	ENSG00000101346
POLD1	Approved symbol	POLD1	DNA polymerase delta 1, catalytic subunit	19q13.3	HGNC:9175	5424	ENSG00000062822
POLD2	Approved symbol	POLD2	DNA polymerase delta 2, accessory subunit	7p13	HGNC:9176	5425	ENSG00000106628
POLR1E	Approved symbol	POLR1E	RNA polymerase I subunit E	9p13.2	HGNC:17631	64425	ENSG00000137054
POLR3E	Approved symbol	POLR3E	RNA polymerase III subunit E	16p12.2	HGNC:30347	55718	ENSG00000058600
POLR3H	Approved symbol	POLR3H	RNA polymerase III subunit H	22q13.2	HGNC:30349	171568	ENSG00000100413
POLRMT	Approved symbol	POLRMT	RNA polymerase mitochondrial	19p13.3	HGNC:9200	5442	ENSG00000099821
POMGNT1	Approved symbol	POMGNT1	protein O-linked mannose N-acetylglucosaminyltransferase 1 (beta 1,2-)	1p34.1	HGNC:19139	55624	ENSG00000085998
POMGNT2	Approved symbol	POMGNT2	protein O-linked mannose N-acetylglucosaminyltransferase 2 (beta 1,4-)	3p22.1	HGNC:25902	84892	ENSG00000144647
POMT2	Approved symbol	POMT2	protein O-mannosyltransferase 2	14q24.3	HGNC:19743	29954	ENSG00000009830
PORCN	Approved symbol	PORCN	porcupine O-acyltransferase	Xp11.23	HGNC:17652	64840	ENSG00000102312
PP7080	Unmatched
PPDPF	Approved symbol	PPDPF	pancreatic progenitor cell differentiation and proliferation factor	20q13.33	HGNC:16142	79144	ENSG00000125534
PPM1G	Approved symbol	PPM1G	protein phosphatase, Mg2+/Mn2+ dependent 1G	2p23.3	HGNC:9278	5496	ENSG00000115241
PPP1CA	Approved symbol	PPP1CA	protein phosphatase 1 catalytic subunit alpha	11q13	HGNC:9281	5499	ENSG00000172531
PPP1R11	Approved symbol	PPP1R11	protein phosphatase 1 regulatory inhibitor subunit 11	6p22.1	HGNC:9285	6992	ENSG00000204619
PPP1R37	Approved symbol	PPP1R37	protein phosphatase 1 regulatory subunit 37	19q13.32	HGNC:27607	284352	ENSG00000104866
PPP1R3F	Approved symbol	PPP1R3F	protein phosphatase 1 regulatory subunit 3F	Xp11.23	HGNC:14944	89801	ENSG00000049769
PPP2R1A	Approved symbol	PPP2R1A	protein phosphatase 2 scaffold subunit Aalpha	19q13.41	HGNC:9302	5518	ENSG00000105568
PPP2R3B	Approved symbol	PPP2R3B	protein phosphatase 2 regulatory subunit B''beta	Xp22.3 and Yp11.3	HGNC:13417	28227	ENSG00000167393
PPP2R5D	Approved symbol	PPP2R5D	protein phosphatase 2 regulatory subunit B'delta	6p21.1	HGNC:9312	5528	ENSG00000112640
PPP4C	Approved symbol	PPP4C	protein phosphatase 4 catalytic subunit	16p11.2	HGNC:9319	5531	ENSG00000149923
PPP6R2	Approved symbol	PPP6R2	protein phosphatase 6 regulatory subunit 2	22q13.33	HGNC:19253	9701	ENSG00000100239
PQLC1	Approved symbol	PQLC1	PQ loop repeat containing 1	18q23	HGNC:26188	80148	ENSG00000122490
PREB	Approved symbol	PREB	prolactin regulatory element binding	2p23.3	HGNC:9356	10113	ENSG00000138073
PRKACA	Approved symbol	PRKACA	protein kinase cAMP-activated catalytic subunit alpha	19p13.1	HGNC:9380	5566	ENSG00000072062
PRKACG	Approved symbol	PRKACG	protein kinase cAMP-activated catalytic subunit gamma	9q21.11	HGNC:9382	5568	ENSG00000165059
PRKAR1B	Approved symbol	PRKAR1B	protein kinase cAMP-dependent type I regulatory subunit beta	7p22.3	HGNC:9390	5575	ENSG00000188191
PRKAR2A-AS1	Approved symbol	PRKAR2A-AS1	PRKAR2A antisense RNA 1	3p21.31	HGNC:40471	100506637	ENSG00000224424
PRKCSH	Approved symbol	PRKCSH	protein kinase C substrate 80K-H	19p13.2	HGNC:9411	5589	ENSG00000130175
PRMT1	Approved symbol	PRMT1	protein arginine methyltransferase 1	19q13.33	HGNC:5187	3276	ENSG00000126457
PROB1	Approved symbol	PROB1	proline rich basic protein 1	5q31.2	HGNC:41906	389333	ENSG00000228672
PRPF31	Approved symbol	PRPF31	pre-mRNA processing factor 31	19q13.42	HGNC:15446	26121	ENSG00000105618
PRR16	Approved symbol	PRR16	proline rich 16	5q23.1	HGNC:29654	51334	ENSG00000184838
PRR24	Previous symbol	INAFM1	InaF motif containing 1	19q13.32	HGNC:27406	255783	ENSG00000257704
PRUNE2	Approved symbol	PRUNE2	prune homolog 2	9q21.2	HGNC:25209	158471	ENSG00000106772
PSMB2	Approved symbol	PSMB2	proteasome subunit beta 2	1p34.3	HGNC:9539	5690	ENSG00000126067
PSMC4	Approved symbol	PSMC4	proteasome 26S subunit, ATPase 4	19q13.11-q13.13	HGNC:9551	5704	ENSG00000013275
PSMC5	Approved symbol	PSMC5	proteasome 26S subunit, ATPase 5	17q23.3	HGNC:9552	5705	ENSG00000087191
PSMD2	Approved symbol	PSMD2	proteasome 26S subunit, non-ATPase 2	3q27.1	HGNC:9559	5708	ENSG00000175166
PSMD3	Approved symbol	PSMD3	proteasome 26S subunit, non-ATPase 3	17q21.1	HGNC:9560	5709	ENSG00000108344
PTDSS1	Approved symbol	PTDSS1	phosphatidylserine synthase 1	8q22.1	HGNC:9587	9791	ENSG00000156471
PTDSS2	Approved symbol	PTDSS2	phosphatidylserine synthase 2	11p15.5	HGNC:15463	81490	ENSG00000174915
PTK2B	Approved symbol	PTK2B	protein tyrosine kinase 2 beta	8p21.2	HGNC:9612	2185	ENSG00000120899
PTOV1	Approved symbol	PTOV1	prostate tumor overexpressed 1	19q13.33	HGNC:9632	53635	ENSG00000104960
PTOV1-AS1	Approved symbol	PTOV1-AS1	PTOV1 antisense RNA 1	19q13.33	HGNC:44174	100506033	ENSG00000268006
PTP4A2	Approved symbol	PTP4A2	protein tyrosine phosphatase type IVA, member 2	1p35.2	HGNC:9635	8073	ENSG00000184007
PTP4A3	Approved symbol	PTP4A3	protein tyrosine phosphatase type IVA, member 3	8q24.3	HGNC:9636	11156	ENSG00000184489
PTRH1	Approved symbol	PTRH1	peptidyl-tRNA hydrolase 1 homolog	9q34.11	HGNC:27039	138428	ENSG00000187024
PUF60	Approved symbol	PUF60	poly(U) binding splicing factor 60	8q24.3	HGNC:17042	22827	ENSG00000179950
PUSL1	Approved symbol	PUSL1	pseudouridylate synthase-like 1	1p36.33	HGNC:26914	126789	ENSG00000169972
PWWP2B	Approved symbol	PWWP2B	PWWP domain containing 2B	10q26.3	HGNC:25150	170394	ENSG00000171813
PYCRL	Previous symbol	PYCR3	pyrroline-5-carboxylate reductase 3	8q24.3	HGNC:25846	65263	ENSG00000104524
QSOX1	Approved symbol	QSOX1	quiescin sulfhydryl oxidase 1	1q25.2	HGNC:9756	5768	ENSG00000116260
R3HCC1	Approved symbol	R3HCC1	R3H domain and coiled-coil containing 1	8p21.3	HGNC:27329	203069	ENSG00000104679
R3HDM2	Approved symbol	R3HDM2	R3H domain containing 2	12q13.3	HGNC:29167	22864	ENSG00000179912
R3HDM4	Approved symbol	R3HDM4	R3H domain containing 4	19p13.3	HGNC:28270	91300	ENSG00000198858
RAB11B	Approved symbol	RAB11B	RAB11B, member RAS oncogene family	19p13.2	HGNC:9761	9230	ENSG00000185236
RAB11FIP3	Approved symbol	RAB11FIP3	RAB11 family interacting protein 3	16p13.3	HGNC:17224	9727	ENSG00000090565
RAB1B	Approved symbol	RAB1B	RAB1B, member RAS oncogene family	11q13.2	HGNC:18370	81876	ENSG00000174903
RAB40B	Approved symbol	RAB40B	RAB40B, member RAS oncogene family	17q25.3	HGNC:18284	10966	ENSG00000141542
RABEP2	Approved symbol	RABEP2	rabaptin, RAB GTPase binding effector protein 2	16p11.2	HGNC:24817	79874	ENSG00000177548
RABGGTA	Approved symbol	RABGGTA	Rab geranylgeranyltransferase alpha subunit	14q11.2	HGNC:9795	5875	ENSG00000100949
RABL6	Approved symbol	RABL6	RAB, member RAS oncogene family like 6	9q34.3	HGNC:24703	55684	ENSG00000196642
RAC1	Approved symbol	RAC1	Rac family small GTPase 1	7p22.1	HGNC:9801	5879	ENSG00000136238
RALBP1	Approved symbol	RALBP1	ralA binding protein 1	18p11.22	HGNC:9841	10928	ENSG00000017797
RALGAPA2	Approved symbol	RALGAPA2	Ral GTPase activating protein catalytic alpha subunit 2	20p11.23	HGNC:16207	57186	ENSG00000188559
RANBP9	Approved symbol	RANBP9	RAN binding protein 9	6p23	HGNC:13727	10048	ENSG00000010017
RAP2C-AS1	Approved symbol	RAP2C-AS1	RAP2C antisense RNA 1	Xq26.2	HGNC:40957	101928578	ENSG00000232160
RAPGEF1	Approved symbol	RAPGEF1	Rap guanine nucleotide exchange factor 1	9q34.13	HGNC:4568	2889	ENSG00000107263
RBCK1	Approved symbol	RBCK1	RANBP2-type and C3HC4-type zinc finger containing 1	20p13	HGNC:15864	10616	ENSG00000125826
RBM42	Approved symbol	RBM42	RNA binding motif protein 42	19q13.12	HGNC:28117	79171	ENSG00000126254
RCC1	Approved symbol	RCC1	regulator of chromosome condensation 1	1p35.3	HGNC:1913	1104	ENSG00000180198
RER1	Approved symbol	RER1	retention in endoplasmic reticulum sorting receptor 1	1p36.32	HGNC:30309	11079	ENSG00000157916
RFC2	Approved symbol	RFC2	replication factor C subunit 2	7q11.23	HGNC:9970	5982	ENSG00000049541
RFFL	Approved symbol	RFFL	ring finger and FYVE like domain containing E3 ubiquitin protein ligase	17q12	HGNC:24821	117584	ENSG00000092871
RFNG	Approved symbol	RFNG	RFNG O-fucosylpeptide 3-beta-N-acetylglucosaminyltransferase	17q25.3	HGNC:9974	5986	ENSG00000169733
RGL2	Approved symbol	RGL2	ral guanine nucleotide dissociation stimulator like 2	6p21.32	HGNC:9769	5863	ENSG00000237441
RGMA	Approved symbol	RGMA	repulsive guidance molecule BMP co-receptor a	15q26.1	HGNC:30308	56963	ENSG00000182175
RHBDD2	Approved symbol	RHBDD2	rhomboid domain containing 2	7q11.23	HGNC:23082	57414	ENSG00000005486
RHBDD3	Approved symbol	RHBDD3	rhomboid domain containing 3	22q12.2	HGNC:1308	25807	ENSG00000100263
RHBDF2	Approved symbol	RHBDF2	rhomboid 5 homolog 2	17q25.3	HGNC:20788	79651	ENSG00000129667
RHOBTB2	Approved symbol	RHOBTB2	Rho related BTB domain containing 2	8p21.3	HGNC:18756	23221	ENSG00000008853
RHOT2	Approved symbol	RHOT2	ras homolog family member T2	16p13.3	HGNC:21169	89941	ENSG00000140983
RIC8A	Approved symbol	RIC8A	RIC8 guanine nucleotide exchange factor A	11p15.5	HGNC:29550	60626	ENSG00000177963
RIMKLA	Approved symbol	RIMKLA	ribosomal modification protein rimK like family member A	1p34.2	HGNC:28725	284716	ENSG00000177181
RIN1	Approved symbol	RIN1	Ras and Rab interactor 1	11q13.2	HGNC:18749	9610	ENSG00000174791
RING1	Approved symbol	RING1	ring finger protein 1	6p21.32	HGNC:10018	6015	ENSG00000204227
RMND5B	Approved symbol	RMND5B	required for meiotic nuclear division 5 homolog B	5q35.3	HGNC:26181	64777	ENSG00000145916
RNA45S5	Approved symbol	RNA45S5	RNA, 45S pre-ribosomal 5	22p12 not on reference assembly	HGNC:44273	110255167
RNASEH1	Approved symbol	RNASEH1	ribonuclease H1	2p25.3	HGNC:18466	246243	ENSG00000171865
RNF10	Approved symbol	RNF10	ring finger protein 10	12q24.31	HGNC:10055	9921	ENSG00000022840
RNF126P1	Approved symbol	RNF126P1	ring finger protein 126 pseudogene 1	17q22	HGNC:30340	376412	ENSG00000261192
RNF166	Approved symbol	RNF166	ring finger protein 166	16q24.2-q24.3	HGNC:28856	115992	ENSG00000158717
RNF167	Approved symbol	RNF167	ring finger protein 167	17p13.2	HGNC:24544	26001	ENSG00000108523
RNF19B	Approved symbol	RNF19B	ring finger protein 19B	1p35.1	HGNC:26886	127544	ENSG00000116514
RNF20	Approved symbol	RNF20	ring finger protein 20	9q31.1	HGNC:10062	56254	ENSG00000155827
RNF215	Approved symbol	RNF215	ring finger protein 215	22q12.2	HGNC:33434	200312	ENSG00000099999
RNF220	Approved symbol	RNF220	ring finger protein 220	1p34.1	HGNC:25552	55182	ENSG00000187147
RNF31	Approved symbol	RNF31	ring finger protein 31	14q12	HGNC:16031	55072	ENSG00000092098
RNH1	Approved symbol	RNH1	ribonuclease/angiogenin inhibitor 1	11p15.5	HGNC:10074	6050	ENSG00000023191
RNPEPL1	Approved symbol	RNPEPL1	arginyl aminopeptidase like 1	2q37.3	HGNC:10079	57140	ENSG00000142327
RNPS1	Approved symbol	RNPS1	RNA binding protein with serine rich domain 1	16p13.3	HGNC:10080	10921	ENSG00000205937
RPS6KA4	Approved symbol	RPS6KA4	ribosomal protein S6 kinase A4	11q13.1	HGNC:10433	8986	ENSG00000162302
RPUSD1	Approved symbol	RPUSD1	RNA pseudouridylate synthase domain containing 1	16p13.3	HGNC:14173	113000	ENSG00000007376
RRP7A	Approved symbol	RRP7A	ribosomal RNA processing 7 homolog A	22q13.2	HGNC:24286	27341	ENSG00000189306
RUVBL1	Approved symbol	RUVBL1	RuvB like AAA ATPase 1	3q21.3	HGNC:10474	8607	ENSG00000175792
RUVBL2	Approved symbol	RUVBL2	RuvB like AAA ATPase 2	19q13.33	HGNC:10475	10856	ENSG00000183207
SAMD1	Approved symbol	SAMD1	sterile alpha motif domain containing 1	19p13.12	HGNC:17958	90378	ENSG00000141858
SARS2	Approved symbol	SARS2	seryl-tRNA synthetase 2, mitochondrial	19q13.2	HGNC:17697	54938	ENSG00000104835
SART1	Approved symbol	SART1	SART1, U4/U6.U5 tri-snRNP-associated protein 1	11q13.1	HGNC:10538	9092	ENSG00000175467
SBF1	Approved symbol	SBF1	SET binding factor 1	22q13.33	HGNC:10542	6305	ENSG00000100241
SBF1P1	Approved symbol	SBF1P1	SET binding factor 1 pseudogene 1	8q12.1	HGNC:31098	100133234	ENSG00000248522
SCARB2	Approved symbol	SCARB2	scavenger receptor class B member 2	4q21.1	HGNC:1665	950	ENSG00000138760
SCN1B	Approved symbol	SCN1B	sodium voltage-gated channel beta subunit 1	19q13.11	HGNC:10586	6324	ENSG00000105711
SCRIB	Approved symbol	SCRIB	scribbled planar cell polarity protein	8q24.3	HGNC:30377	23513	ENSG00000180900
SCXB	Previous symbol	SCX	scleraxis bHLH transcription factor	8q24.3	HGNC:32322	642658	ENSG00000260428
SDCCAG3	Approved symbol	SDCCAG3	serologically defined colon cancer antigen 3	9q34.3	HGNC:10667	10807	ENSG00000165689
SDF2L1	Approved symbol	SDF2L1	stromal cell derived factor 2 like 1	22q11.21	HGNC:10676	23753	ENSG00000128228
SDF4	Approved symbol	SDF4	stromal cell derived factor 4	1p36.33	HGNC:24188	51150	ENSG00000078808
SENP3	Approved symbol	SENP3	SUMO specific peptidase 3	17p13	HGNC:17862	26168	ENSG00000161956
SEPN1	Previous symbol	SELENON	selenoprotein N	1p36.11	HGNC:15999	57190	ENSG00000162430
SEPT9	Approved symbol	SEPT9	septin 9	17q25.3	HGNC:7323	10801	ENSG00000184640
SERINC2	Approved symbol	SERINC2	serine incorporator 2	1p35.2	HGNC:23231	347735	ENSG00000168528
SERPINF1	Approved symbol	SERPINF1	serpin family F member 1	17p13.3	HGNC:8824	5176	ENSG00000132386
SET	Approved symbol	SET	SET nuclear proto-oncogene	9q34.11	HGNC:10760	6418	ENSG00000119335
SETD6	Approved symbol	SETD6	SET domain containing 6	16q21	HGNC:26116	79918	ENSG00000103037
SETD8	Previous symbol	KMT5A	lysine methyltransferase 5A	12q24.31	HGNC:29489	387893	ENSG00000183955
SGCA	Approved symbol	SGCA	sarcoglycan alpha	17q21.33	HGNC:10805	6442	ENSG00000108823
SGCD	Approved symbol	SGCD	sarcoglycan delta	5q33.2-q33.3	HGNC:10807	6444	ENSG00000170624
SGSM2	Approved symbol	SGSM2	small G protein signaling modulator 2	17p13.3	HGNC:29026	9905	ENSG00000141258
SH2B2	Approved symbol	SH2B2	SH2B adaptor protein 2	7q22.1	HGNC:17381	10603	ENSG00000160999
SH3GLB1	Approved symbol	SH3GLB1	SH3 domain containing GRB2 like, endophilin B1	1p22.3	HGNC:10833	51100	ENSG00000097033
SH3GLB2	Approved symbol	SH3GLB2	SH3 domain containing GRB2 like, endophilin B2	9q34.11	HGNC:10834	56904	ENSG00000148341
SH3RF3	Approved symbol	SH3RF3	SH3 domain containing ring finger 3	2q13	HGNC:24699	344558	ENSG00000172985
SHMT2	Approved symbol	SHMT2	serine hydroxymethyltransferase 2	12q12-q14	HGNC:10852	6472	ENSG00000182199
SIAH2	Approved symbol	SIAH2	siah E3 ubiquitin protein ligase 2	3q25.1	HGNC:10858	6478	ENSG00000181788
SIL1	Approved symbol	SIL1	SIL1 nucleotide exchange factor	5q31.2	HGNC:24624	64374	ENSG00000120725
SIRT6	Approved symbol	SIRT6	sirtuin 6	19p13.3	HGNC:14934	51548	ENSG00000077463
SLBP	Approved symbol	SLBP	stem-loop binding protein	4p16.3	HGNC:10904	7884	ENSG00000163950
SLC10A3	Approved symbol	SLC10A3	solute carrier family 10 member 3	Xq28	HGNC:22979	8273	ENSG00000126903
SLC22A23	Approved symbol	SLC22A23	solute carrier family 22 member 23	6p25.2	HGNC:21106	63027	ENSG00000137266
SLC24A3	Approved symbol	SLC24A3	solute carrier family 24 member 3	20p11.23	HGNC:10977	57419	ENSG00000185052
SLC25A10	Approved symbol	SLC25A10	solute carrier family 25 member 10	17q25.3	HGNC:10980	1468	ENSG00000183048
SLC25A15	Approved symbol	SLC25A15	solute carrier family 25 member 15	13q14.11	HGNC:10985	10166	ENSG00000102743
SLC25A44	Approved symbol	SLC25A44	solute carrier family 25 member 44	1q22	HGNC:29036	9673	ENSG00000160785
SLC27A4	Approved symbol	SLC27A4	solute carrier family 27 member 4	9q34.11	HGNC:10998	10999	ENSG00000167114
SLC2A5	Approved symbol	SLC2A5	solute carrier family 2 member 5	1p36.23	HGNC:11010	6518	ENSG00000142583
SLC35A2	Approved symbol	SLC35A2	solute carrier family 35 member A2	Xp11.23	HGNC:11022	7355	ENSG00000102100
SLC35A4	Approved symbol	SLC35A4	solute carrier family 35 member A4	5q31.3	HGNC:20753	113829	ENSG00000176087
SLC35C1	Approved symbol	SLC35C1	solute carrier family 35 member C1	11p11.2	HGNC:20197	55343	ENSG00000181830
SLC35E1	Approved symbol	SLC35E1	solute carrier family 35 member E1	19p13.11	HGNC:20803	79939	ENSG00000127526
SLC35E4	Approved symbol	SLC35E4	solute carrier family 35 member E4	22q12.2	HGNC:17058	339665	ENSG00000100036
SLC39A1	Approved symbol	SLC39A1	solute carrier family 39 member 1	1q21.3	HGNC:12876	27173	ENSG00000143570
SLC39A13	Approved symbol	SLC39A13	solute carrier family 39 member 13	11p11.2	HGNC:20859	91252	ENSG00000165915
SLC39A3	Approved symbol	SLC39A3	solute carrier family 39 member 3	19p13.3	HGNC:17128	29985	ENSG00000141873
SLC40A1	Approved symbol	SLC40A1	solute carrier family 40 member 1	2q32.2	HGNC:10909	30061	ENSG00000138449
SLC43A2	Approved symbol	SLC43A2	solute carrier family 43 member 2	17p13.3	HGNC:23087	124935	ENSG00000167703
SLC44A2	Approved symbol	SLC44A2	solute carrier family 44 member 2	19p13.2	HGNC:17292	57153	ENSG00000129353
SLC48A1	Approved symbol	SLC48A1	solute carrier family 48 member 1	12q13.11	HGNC:26035	55652	ENSG00000211584
SLC4A2	Approved symbol	SLC4A2	solute carrier family 4 member 2	7q36.1	HGNC:11028	6522	ENSG00000164889
SLC6A6	Approved symbol	SLC6A6	solute carrier family 6 member 6	3p25.1	HGNC:11052	6533	ENSG00000131389
SMARCA4	Approved symbol	SMARCA4	SWI/SNF related, matrix associated, actin dependent regulator of chromatin, subfamily a, member 4	19p13.2	HGNC:11100	6597	ENSG00000127616
SMARCB1	Approved symbol	SMARCB1	SWI/SNF related, matrix associated, actin dependent regulator of chromatin, subfamily b, member 1	22q11.23	HGNC:11103	6598	ENSG00000099956
SMG5	Approved symbol	SMG5	SMG5, nonsense mediated mRNA decay factor	1q22	HGNC:24644	23381	ENSG00000198952
SMG9	Approved symbol	SMG9	SMG9, nonsense mediated mRNA decay factor	19q13.31	HGNC:25763	56006	ENSG00000105771
SMOC1	Approved symbol	SMOC1	SPARC related modular calcium binding 1	14q24.1	HGNC:20318	64093	ENSG00000198732
SMPD1	Approved symbol	SMPD1	sphingomyelin phosphodiesterase 1	11p15.4	HGNC:11120	6609	ENSG00000166311
SMS	Approved symbol	SMS	spermine synthase	Xp22.11	HGNC:11123	6611	ENSG00000102172
SMYD5	Approved symbol	SMYD5	SMYD family member 5	2p13.2	HGNC:16258	10322	ENSG00000135632
SNAI3	Approved symbol	SNAI3	snail family transcriptional repressor 3	16q24.3	HGNC:18411	333929	ENSG00000185669
SNAI3-AS1	Approved symbol	SNAI3-AS1	SNAI3 antisense RNA 1	16q24.2	HGNC:28327	197187	ENSG00000260630
SNAP29	Approved symbol	SNAP29	synaptosome associated protein 29	22q11.21	HGNC:11133	9342	ENSG00000099940
SNAP47	Approved symbol	SNAP47	synaptosome associated protein 47	1q42.13	HGNC:30669	116841	ENSG00000143740
SNAPC2	Approved symbol	SNAPC2	small nuclear RNA activating complex polypeptide 2	19p13	HGNC:11135	6618	ENSG00000104976
SND1	Approved symbol	SND1	staphylococcal nuclease and tudor domain containing 1	7q32.1	HGNC:30646	27044	ENSG00000197157
SNPH	Approved symbol	SNPH	syntaphilin	20p13	HGNC:15931	9751	ENSG00000101298
SNRPB	Approved symbol	SNRPB	small nuclear ribonucleoprotein polypeptides B and B1	20p13	HGNC:11153	6628	ENSG00000125835
SNX12	Approved symbol	SNX12	sorting nexin 12	Xq13.1	HGNC:14976	29934	ENSG00000147164
SNX8	Approved symbol	SNX8	sorting nexin 8	7p22.3	HGNC:14972	29886	ENSG00000106266
SPATA20	Approved symbol	SPATA20	spermatogenesis associated 20	17q21.33	HGNC:26125	64847	ENSG00000006282
SPATS2L	Approved symbol	SPATS2L	spermatogenesis associated serine rich 2 like	2q33.1	HGNC:24574	26010	ENSG00000196141
SPDYE3	Approved symbol	SPDYE3	speedy/RINGO cell cycle regulator family member E3	7q22.1	HGNC:35462	441272	ENSG00000214300
SPNS1	Approved symbol	SPNS1	sphingolipid transporter 1 (putative)	16p11.2	HGNC:30621	83985	ENSG00000169682
SPSB3	Approved symbol	SPSB3	splA/ryanodine receptor domain and SOCS box containing 3	16p13.3	HGNC:30629	90864	ENSG00000162032
SQRDL	Previous symbol	SQOR	sulfide quinone oxidoreductase	15q21.1	HGNC:20390	58472	ENSG00000137767
SREBF1	Approved symbol	SREBF1	sterol regulatory element binding transcription factor 1	17p11.2	HGNC:11289	6720	ENSG00000072310
SREBF2	Approved symbol	SREBF2	sterol regulatory element binding transcription factor 2	22q13.2	HGNC:11290	6721	ENSG00000198911
SRF	Approved symbol	SRF	serum response factor	6p21.1	HGNC:11291	6722	ENSG00000112658
SSBP4	Approved symbol	SSBP4	single stranded DNA binding protein 4	19p13.1	HGNC:15676	170463	ENSG00000130511
SSRP1	Approved symbol	SSRP1	structure specific recognition protein 1	11q12.1	HGNC:11327	6749	ENSG00000149136
SSSCA1	Approved symbol	SSSCA1	Sjogren syndrome/scleroderma autoantigen 1	11q13.1	HGNC:11328	10534	ENSG00000173465
ST6GALNAC4	Approved symbol	ST6GALNAC4	ST6 N-acetylgalactosaminide alpha-2,6-sialyltransferase 4	9q34.11	HGNC:17846	27090	ENSG00000136840
STEAP3	Approved symbol	STEAP3	STEAP3 metalloreductase	2q14.2	HGNC:24592	55240	ENSG00000115107
STK11	Approved symbol	STK11	serine/threonine kinase 11	19p13.3	HGNC:11389	6794	ENSG00000118046
STK24	Approved symbol	STK24	serine/threonine kinase 24	13q32.2	HGNC:11403	8428	ENSG00000102572
STK25	Approved symbol	STK25	serine/threonine kinase 25	2q37.3	HGNC:11404	10494	ENSG00000115694
STK40	Approved symbol	STK40	serine/threonine kinase 40	1p34.3	HGNC:21373	83931	ENSG00000196182
STOML1	Approved symbol	STOML1	stomatin like 1	15q24.1	HGNC:14560	9399	ENSG00000067221
STX4	Approved symbol	STX4	syntaxin 4	16p11.2	HGNC:11439	6810	ENSG00000103496
SUGP1	Approved symbol	SUGP1	SURP and G-patch domain containing 1	19p13	HGNC:18643	57794	ENSG00000105705
SURF2	Approved symbol	SURF2	surfeit 2	9q34.2	HGNC:11475	6835	ENSG00000148291
SURF6	Approved symbol	SURF6	surfeit 6	9q34.2	HGNC:11478	6838	ENSG00000148296
SYNC	Approved symbol	SYNC	syncoilin, intermediate filament protein	1p35.1	HGNC:28897	81493	ENSG00000162520
SYNGR2	Approved symbol	SYNGR2	synaptogyrin 2	17q25.3	HGNC:11499	9144	ENSG00000108639
SZRD1	Approved symbol	SZRD1	SUZ RNA binding domain containing 1	1p36.13	HGNC:30232	26099	ENSG00000055070
TADA2B	Approved symbol	TADA2B	transcriptional adaptor 2B	4p16.1	HGNC:30781	93624	ENSG00000173011
TADA3	Approved symbol	TADA3	transcriptional adaptor 3	3p25.3	HGNC:19422	10474	ENSG00000171148
TAF10	Approved symbol	TAF10	TATA-box binding protein associated factor 10	11p15.4	HGNC:11543	6881	ENSG00000166337
TAF6L	Approved symbol	TAF6L	TATA-box binding protein associated factor 6 like	11q12.3	HGNC:17305	10629	ENSG00000162227
TAF9B	Approved symbol	TAF9B	TATA-box binding protein associated factor 9b	Xq21.1	HGNC:17306	51616	ENSG00000187325
TALDO1	Approved symbol	TALDO1	transaldolase 1	11p15.5	HGNC:11559	6888	ENSG00000177156
TBC1D10B	Approved symbol	TBC1D10B	TBC1 domain family member 10B	16p11.2	HGNC:24510	26000	ENSG00000169221
TBC1D17	Approved symbol	TBC1D17	TBC1 domain family member 17	19q13.33	HGNC:25699	79735	ENSG00000104946
TBC1D22A	Approved symbol	TBC1D22A	TBC1 domain family member 22A	22q13.31	HGNC:1309	25771	ENSG00000054611
TBC1D25	Approved symbol	TBC1D25	TBC1 domain family member 25	Xp11.23	HGNC:8092	4943	ENSG00000068354
TBC1D9B	Approved symbol	TBC1D9B	TBC1 domain family member 9B	5q35.3	HGNC:29097	23061	ENSG00000197226
TBCB	Approved symbol	TBCB	tubulin folding cofactor B	19q13.12	HGNC:1989	1155	ENSG00000105254
TBL3	Approved symbol	TBL3	transducin beta like 3	16p13.3	HGNC:11587	10607	ENSG00000183751
TCEA2	Approved symbol	TCEA2	transcription elongation factor A2	20q13.33	HGNC:11614	6919	ENSG00000171703
TCEAL3	Approved symbol	TCEAL3	transcription elongation factor A like 3	Xq22.2	HGNC:28247	85012	ENSG00000196507
TCEAL4	Approved symbol	TCEAL4	transcription elongation factor A like 4	Xq22.2	HGNC:26121	79921	ENSG00000133142
TCF25	Approved symbol	TCF25	transcription factor 25	16q24.3	HGNC:29181	22980	ENSG00000141002
TCF3	Approved symbol	TCF3	transcription factor 3	19p13.3	HGNC:11633	6929	ENSG00000071564
TEAD3	Approved symbol	TEAD3	TEA domain transcription factor 3	6p21.31	HGNC:11716	7005	ENSG00000007866
TECPR1	Approved symbol	TECPR1	tectonin beta-propeller repeat containing 1	7q21.3	HGNC:22214	25851	ENSG00000205356
TELO2	Approved symbol	TELO2	telomere maintenance 2	16p13.3	HGNC:29099	9894	ENSG00000100726
TESK1	Approved symbol	TESK1	testis associated actin remodelling kinase 1	9p13.3	HGNC:11731	7016	ENSG00000107140
TEX261	Approved symbol	TEX261	testis expressed 261	2p13.3	HGNC:30712	113419	ENSG00000144043
THAP7	Approved symbol	THAP7	THAP domain containing 7	22q11.21	HGNC:23190	80764	ENSG00000184436
TIGD7	Approved symbol	TIGD7	tigger transposable element derived 7	16p13.3	HGNC:18331	91151	ENSG00000140993
TMBIM1	Approved symbol	TMBIM1	transmembrane BAX inhibitor motif containing 1	2q35	HGNC:23410	64114	ENSG00000135926
TMCO4	Approved symbol	TMCO4	transmembrane and coiled-coil domains 4	1p36.13	HGNC:27393	255104	ENSG00000162542
TMED2	Approved symbol	TMED2	transmembrane p24 trafficking protein 2	12q24.31	HGNC:16996	10959	ENSG00000086598
TMEM102	Approved symbol	TMEM102	transmembrane protein 102	17p13.1	HGNC:26722	284114	ENSG00000181284
TMEM104	Approved symbol	TMEM104	transmembrane protein 104	17q25.1	HGNC:25984	54868	ENSG00000109066
TMEM161A	Approved symbol	TMEM161A	transmembrane protein 161A	19p13.11	HGNC:26020	54929	ENSG00000064545
TMEM177	Approved symbol	TMEM177	transmembrane protein 177	2q14.2	HGNC:28143	80775	ENSG00000144120
TMEM18	Approved symbol	TMEM18	transmembrane protein 18	2p25.3	HGNC:25257	129787	ENSG00000151353
TMEM184A	Approved symbol	TMEM184A	transmembrane protein 184A	7p22.3	HGNC:28797	202915	ENSG00000164855
TMEM189	Approved symbol	TMEM189	transmembrane protein 189	20q13.13	HGNC:16735	387521	ENSG00000240849
TMEM222	Approved symbol	TMEM222	transmembrane protein 222	1p36.11	HGNC:25363	84065	ENSG00000186501
TMEM25	Approved symbol	TMEM25	transmembrane protein 25	11q23.3	HGNC:25890	84866	ENSG00000149582
TMEM259	Approved symbol	TMEM259	transmembrane protein 259	19p13.3	HGNC:17039	91304	ENSG00000182087
TMEM5	Previous symbol	RXYLT1	ribitol xylosyltransferase 1	12q14.2	HGNC:13530	10329	ENSG00000118600
TMEM66	Previous symbol	SARAF	store-operated calcium entry associated regulatory factor	8p12	HGNC:28789	51669	ENSG00000133872
TNFAIP1	Approved symbol	TNFAIP1	TNF alpha induced protein 1	17q11.2	HGNC:11894	7126	ENSG00000109079
TNIP1	Approved symbol	TNIP1	TNFAIP3 interacting protein 1	5q33.1	HGNC:16903	10318	ENSG00000145901
TNS3	Approved symbol	TNS3	tensin 3	7p12.3	HGNC:21616	64759	ENSG00000136205
TOLLIP	Approved symbol	TOLLIP	toll interacting protein	11p15.5	HGNC:16476	54472	ENSG00000078902
TOLLIP-AS1	Approved symbol	TOLLIP-AS1	TOLLIP antisense RNA 1 (head to head)	11p15.5	HGNC:27403	255512	ENSG00000255153
TOM1	Approved symbol	TOM1	target of myb1 membrane trafficking protein	22q12.3	HGNC:11982	10043	ENSG00000100284
TOP2B	Approved symbol	TOP2B	DNA topoisomerase II beta	3p24.2	HGNC:11990	7155	ENSG00000077097
TOR1B	Approved symbol	TOR1B	torsin family 1 member B	9q34.11	HGNC:11995	27348	ENSG00000136816
TP53I13	Approved symbol	TP53I13	tumor protein p53 inducible protein 13	17q11.2	HGNC:25102	90313	ENSG00000167543
TPD52L2	Approved symbol	TPD52L2	tumor protein D52 like 2	20q13.33	HGNC:12007	7165	ENSG00000101150
TPGS1	Approved symbol	TPGS1	tubulin polyglutamylase complex subunit 1	19p13.3	HGNC:25058	91978	ENSG00000141933
TPRN	Approved symbol	TPRN	taperin	9q34.3	HGNC:26894	286262	ENSG00000176058
TRABD	Approved symbol	TRABD	TraB domain containing	22q13.33	HGNC:28805	80305	ENSG00000170638
TRAF2	Approved symbol	TRAF2	TNF receptor associated factor 2	9q34.3	HGNC:12032	7186	ENSG00000127191
TRAF3	Approved symbol	TRAF3	TNF receptor associated factor 3	14q32.32	HGNC:12033	7187	ENSG00000131323
TRAM2-AS1	Approved symbol	TRAM2-AS1	TRAM2 antisense RNA 1 (head to head)	6p12.2	HGNC:48663	401264	ENSG00000225791
TRAPPC1	Approved symbol	TRAPPC1	trafficking protein particle complex 1	17p13.1	HGNC:19894	58485	ENSG00000170043
TRIM39	Approved symbol	TRIM39	tripartite motif containing 39	6p22.1	HGNC:10065	56658	ENSG00000204599
TRIM41	Approved symbol	TRIM41	tripartite motif containing 41	5q35.3	HGNC:19013	90933	ENSG00000146063
TRIM72	Approved symbol	TRIM72	tripartite motif containing 72	16p11.2	HGNC:32671	493829	ENSG00000177238
TRMT61A	Approved symbol	TRMT61A	tRNA methyltransferase 61A	14q32	HGNC:23790	115708	ENSG00000166166
TRPC4AP	Approved symbol	TRPC4AP	transient receptor potential cation channel subfamily C member 4 associated protein	20q11.22	HGNC:16181	26133	ENSG00000100991
TSC2	Approved symbol	TSC2	TSC complex subunit 2	16p13.3	HGNC:12363	7249	ENSG00000103197
TSEN34	Approved symbol	TSEN34	tRNA splicing endonuclease subunit 34	19q13.42	HGNC:15506	79042	ENSG00000170892
TSEN54	Approved symbol	TSEN54	tRNA splicing endonuclease subunit 54	17q25.1	HGNC:27561	283989	ENSG00000182173
TSPAN7	Approved symbol	TSPAN7	tetraspanin 7	Xp11.4	HGNC:11854	7102	ENSG00000156298
TSSC4	Approved symbol	TSSC4	tumor suppressing subtransferable candidate 4	11p15.5	HGNC:12386	10078	ENSG00000184281
TSTA3	Approved symbol	TSTA3	tissue specific transplantation antigen P35B	8q24.3	HGNC:12390	7264	ENSG00000104522
TTC9	Approved symbol	TTC9	tetratricopeptide repeat domain 9	14q24.2	HGNC:20267	23508	ENSG00000133985
TTLL12	Approved symbol	TTLL12	tubulin tyrosine ligase like 12	22q13.2	HGNC:28974	23170	ENSG00000100304
TUBA4A	Approved symbol	TUBA4A	tubulin alpha 4a	2q35	HGNC:12407	7277	ENSG00000127824
TUBA4B	Approved symbol	TUBA4B	tubulin alpha 4b	2q35	HGNC:18637	80086	ENSG00000243910
TUBG1	Approved symbol	TUBG1	tubulin gamma 1	17q21.31	HGNC:12417	7283	ENSG00000131462
TYW1	Approved symbol	TYW1	tRNA-yW synthesizing protein 1 homolog	7q11.21	HGNC:25598	55253	ENSG00000198874
TYW1B	Approved symbol	TYW1B	tRNA-yW synthesizing protein 1 homolog B	7q11.22-q11.23	HGNC:33908	441250	ENSG00000277149
UBAP1	Approved symbol	UBAP1	ubiquitin associated protein 1	9p13.3	HGNC:12461	51271	ENSG00000165006
UBE2D2	Approved symbol	UBE2D2	ubiquitin conjugating enzyme E2 D2	5q31.2	HGNC:12475	7322	ENSG00000131508
UBE2MP1	Approved symbol	UBE2MP1	ubiquitin conjugating enzyme E2 M pseudogene 1	16p11.2	HGNC:32195	606551	ENSG00000261461
UBE2Q1	Approved symbol	UBE2Q1	ubiquitin conjugating enzyme E2 Q1	1q21.3	HGNC:15698	55585	ENSG00000160714
UBE2R2	Approved symbol	UBE2R2	ubiquitin conjugating enzyme E2 R2	9p13.3	HGNC:19907	54926	ENSG00000107341
UBTD1	Approved symbol	UBTD1	ubiquitin domain containing 1	10q24.1-q24.2	HGNC:25683	80019	ENSG00000165886
UBXN2B	Approved symbol	UBXN2B	UBX domain protein 2B	8q12.1	HGNC:27035	137886	ENSG00000215114
UBXN6	Approved symbol	UBXN6	UBX domain protein 6	19p13	HGNC:14928	80700	ENSG00000167671
UCHL1	Approved symbol	UCHL1	ubiquitin C-terminal hydrolase L1	4p13	HGNC:12513	7345	ENSG00000154277
UCK1	Approved symbol	UCK1	uridine-cytidine kinase 1	9q34.13	HGNC:14859	83549	ENSG00000130717
UIMC1	Approved symbol	UIMC1	ubiquitin interaction motif containing 1	5q35.2	HGNC:30298	51720	ENSG00000087206
ULK3	Approved symbol	ULK3	unc-51 like kinase 3	15q24.1	HGNC:19703	25989	ENSG00000140474
UNG	Approved symbol	UNG	uracil DNA glycosylase	12q24.11	HGNC:12572	7374	ENSG00000076248
USB1	Approved symbol	USB1	U6 snRNA biogenesis phosphodiesterase 1	16q21	HGNC:25792	79650	ENSG00000103005
USP35	Approved symbol	USP35	ubiquitin specific peptidase 35	11q13.4	HGNC:20061	57558	ENSG00000118369
USP5	Approved symbol	USP5	ubiquitin specific peptidase 5	12p13	HGNC:12628	8078	ENSG00000111667
UXS1	Approved symbol	UXS1	UDP-glucuronate decarboxylase 1	2q12.2	HGNC:17729	80146	ENSG00000115652
VAC14	Approved symbol	VAC14	Vac14, PIKFYVE complex component	16q22.1-q22.2	HGNC:25507	55697	ENSG00000103043
VARS	Approved symbol	VARS	valyl-tRNA synthetase	6p21.33	HGNC:12651	7407	ENSG00000204394
VCP	Approved symbol	VCP	valosin containing protein	9p13.3	HGNC:12666	7415	ENSG00000165280
VIPR2	Approved symbol	VIPR2	vasoactive intestinal peptide receptor 2	7q36.3	HGNC:12695	7434	ENSG00000106018
VOPP1	Approved symbol	VOPP1	VOPP1, WBP1/VOPP1 family member	7p11.2	HGNC:34518	81552	ENSG00000154978
VPS26B	Approved symbol	VPS26B	VPS26, retromer complex component B	11q25	HGNC:28119	112936	ENSG00000151502
VPS28	Approved symbol	VPS28	VPS28, ESCRT-I subunit	8q24.3	HGNC:18178	51160	ENSG00000160948
WBSCR22	Previous symbol	BUD23	BUD23, rRNA methyltransferase and ribosome maturation factor	7q11.23	HGNC:16405	114049	ENSG00000071462
WDR25	Approved symbol	WDR25	WD repeat domain 25	14q32.32	HGNC:21064	79446	ENSG00000176473
WDR34	Approved symbol	WDR34	WD repeat domain 34	9q34.11	HGNC:28296	89891	ENSG00000119333
WDR5	Approved symbol	WDR5	WD repeat domain 5	9q34.2	HGNC:12757	11091	ENSG00000196363
WDR60	Approved symbol	WDR60	WD repeat domain 60	7q36.3	HGNC:21862	55112	ENSG00000126870
WDR70	Approved symbol	WDR70	WD repeat domain 70	5p13.2	HGNC:25495	55100	ENSG00000082068
WDR74	Approved symbol	WDR74	WD repeat domain 74	11q12.3	HGNC:25529	54663	ENSG00000133316
WIBG	Previous symbol	PYM1	PYM homolog 1, exon junction complex associated factor	12q13.2	HGNC:30258	84305	ENSG00000170473
WIPI2	Approved symbol	WIPI2	WD repeat domain, phosphoinositide interacting 2	7p22.1	HGNC:32225	26100	ENSG00000157954
WNK2	Approved symbol	WNK2	WNK lysine deficient protein kinase 2	9q22.31	HGNC:14542	65268	ENSG00000165238
WRAP73	Approved symbol	WRAP73	WD repeat containing, antisense to TP73	1p36.32	HGNC:12759	49856	ENSG00000116213
WSB2	Approved symbol	WSB2	WD repeat and SOCS box containing 2	12q24.23	HGNC:19222	55884	ENSG00000176871
WSCD1	Approved symbol	WSCD1	WSC domain containing 1	17p13.2	HGNC:29060	23302	ENSG00000179314
YARS	Approved symbol	YARS	tyrosyl-tRNA synthetase	1p35.1	HGNC:12840	8565	ENSG00000134684
YBEY	Approved symbol	YBEY	ybeY metallopeptidase (putative)	21q22.3	HGNC:1299	54059	ENSG00000182362
YDJC	Approved symbol	YDJC	YdjC chitooligosaccharide deacetylase homolog	22q11.21	HGNC:27158	150223	ENSG00000161179
YIF1A	Approved symbol	YIF1A	Yip1 interacting factor homolog A, membrane trafficking protein	11q13.2	HGNC:16688	10897	ENSG00000174851
YIPF2	Approved symbol	YIPF2	Yip1 domain family member 2	19p13.2	HGNC:28476	78992	ENSG00000130733
YIPF3	Approved symbol	YIPF3	Yip1 domain family member 3	6p21.1	HGNC:21023	25844	ENSG00000137207
YKT6	Approved symbol	YKT6	YKT6 v-SNARE homolog	7p13	HGNC:16959	10652	ENSG00000106636
YY1	Approved symbol	YY1	YY1 transcription factor	14q32.2	HGNC:12856	7528	ENSG00000100811
ZBED5-AS1	Approved symbol	ZBED5-AS1	ZBED5 antisense RNA 1	11p15.4	HGNC:48646	729013	ENSG00000247271
ZBTB17	Approved symbol	ZBTB17	zinc finger and BTB domain containing 17	1p36.13	HGNC:12936	7709	ENSG00000116809
ZBTB22	Approved symbol	ZBTB22	zinc finger and BTB domain containing 22	6p21.3	HGNC:13085	9278	ENSG00000236104
ZBTB47	Approved symbol	ZBTB47	zinc finger and BTB domain containing 47	3p22.1	HGNC:26955	92999	ENSG00000114853
ZBTB7A	Approved symbol	ZBTB7A	zinc finger and BTB domain containing 7A	19p13.3	HGNC:18078	51341	ENSG00000178951
ZBTB7B	Approved symbol	ZBTB7B	zinc finger and BTB domain containing 7B	1q21.3	HGNC:18668	51043	ENSG00000160685
ZC2HC1C	Approved symbol	ZC2HC1C	zinc finger C2HC-type containing 1C	14q24.3	HGNC:20354	79696	ENSG00000119703
ZDHHC1	Approved symbol	ZDHHC1	zinc finger DHHC-type containing 1	16q22.1	HGNC:17916	29800	ENSG00000159714
ZDHHC24	Approved symbol	ZDHHC24	zinc finger DHHC-type containing 24	11q13.2	HGNC:27387	254359	ENSG00000174165
ZDHHC5	Approved symbol	ZDHHC5	zinc finger DHHC-type containing 5	11q12.1	HGNC:18472	25921	ENSG00000156599
ZER1	Approved symbol	ZER1	zyg-11 related cell cycle regulator	9q34.11	HGNC:30960	10444	ENSG00000160445
ZFAND2B	Approved symbol	ZFAND2B	zinc finger AN1-type containing 2B	2q35	HGNC:25206	130617	ENSG00000158552
ZFPL1	Approved symbol	ZFPL1	zinc finger protein like 1	11q13.1	HGNC:12868	7542	ENSG00000162300
ZFPM1	Approved symbol	ZFPM1	zinc finger protein, FOG family member 1	16q24.2	HGNC:19762	161882	ENSG00000179588
ZGPAT	Approved symbol	ZGPAT	zinc finger CCCH-type and G-patch domain containing	20q13.33	HGNC:15948	84619	ENSG00000197114
ZNF16	Approved symbol	ZNF16	zinc finger protein 16	8q24.3	HGNC:12947	7564	ENSG00000170631
ZNF185	Approved symbol	ZNF185	zinc finger protein 185 with LIM domain	Xq28	HGNC:12976	7739	ENSG00000147394
ZNF197	Approved symbol	ZNF197	zinc finger protein 197	3p21.31	HGNC:12988	10168	ENSG00000186448
ZNF213	Approved symbol	ZNF213	zinc finger protein 213	16p13.3	HGNC:13005	7760	ENSG00000085644
ZNF219	Approved symbol	ZNF219	zinc finger protein 219	14q11	HGNC:13011	51222	ENSG00000165804
ZNF362	Approved symbol	ZNF362	zinc finger protein 362	1p35.1	HGNC:18079	149076	ENSG00000160094
ZNF414	Approved symbol	ZNF414	zinc finger protein 414	19p13.2	HGNC:20630	84330	ENSG00000133250
ZNF428	Approved symbol	ZNF428	zinc finger protein 428	19q13.31	HGNC:20804	126299	ENSG00000131116
ZNF444	Approved symbol	ZNF444	zinc finger protein 444	19q13.43	HGNC:16052	55311	ENSG00000167685
ZNF496	Approved symbol	ZNF496	zinc finger protein 496	1q44	HGNC:23713	84838	ENSG00000162714
ZNF524	Approved symbol	ZNF524	zinc finger protein 524	19q13.43	HGNC:28322	147807	ENSG00000171443
ZNF581	Approved symbol	ZNF581	zinc finger protein 581	19q13.42	HGNC:25017	51545	ENSG00000171425
ZNF593	Approved symbol	ZNF593	zinc finger protein 593	1p36.11	HGNC:30943	51042	ENSG00000142684
ZNF598	Approved symbol	ZNF598	zinc finger protein 598	16p13.3	HGNC:28079	90850	ENSG00000167962
ZNF628	Approved symbol	ZNF628	zinc finger protein 628	19q13.42	HGNC:28054	89887	ENSG00000197483
ZNF696	Approved symbol	ZNF696	zinc finger protein 696	8q24.3	HGNC:25872	79943	ENSG00000185730
ZNF703	Approved symbol	ZNF703	zinc finger protein 703	8p11.23	HGNC:25883	80139	ENSG00000183779
ZNF787	Approved symbol	ZNF787	zinc finger protein 787	19q13.43	HGNC:26998	126208	ENSG00000142409
ZNF865	Approved symbol	ZNF865	zinc finger protein 865	19q13.42	HGNC:38705	100507290	ENSG00000261221
ZNHIT2	Approved symbol	ZNHIT2	zinc finger HIT-type containing 2	11q13.1	HGNC:1177	741	ENSG00000174276
ZNRF1	Approved symbol	ZNRF1	zinc and ring finger 1	16q23.1	HGNC:18452	84937	ENSG00000186187
ZNRF2	Approved symbol	ZNRF2	zinc and ring finger 2	7p14.3	HGNC:22316	223082	ENSG00000180233
ZRSR2	Approved symbol	ZRSR2	zinc finger CCCH-type, RNA binding motif and serine/arginine rich 2	Xp22.2	HGNC:23019	8233	ENSG00000169249

## Sheet: M4
HGNC gene symbol	Gene symbol annotation status	Corresponding approved gene symbol	Corresponding approved name	Location	Associated HGNC ID	Associated Entrez ID	Associated Ensembl ID
AASS	Approved symbol	AASS	aminoadipate-semialdehyde synthase	7q31.32	HGNC:17366	10157	ENSG00000008311
ABCA10	Approved symbol	ABCA10	ATP binding cassette subfamily A member 10	17q24.3	HGNC:30	10349	ENSG00000154263
ABCA11P	Approved symbol	ABCA11P	ATP binding cassette subfamily A member 11, pseudogene	4p16.3	HGNC:31	79963	ENSG00000251595
ABCA6	Approved symbol	ABCA6	ATP binding cassette subfamily A member 6	17q24.2-q24.3	HGNC:36	23460	ENSG00000154262
ABCA9	Approved symbol	ABCA9	ATP binding cassette subfamily A member 9	17q24.2	HGNC:39	10350	ENSG00000154258
ABCC5	Approved symbol	ABCC5	ATP binding cassette subfamily C member 5	3q27.1	HGNC:56	10057	ENSG00000114770
ABCC9	Approved symbol	ABCC9	ATP binding cassette subfamily C member 9	12p12.1	HGNC:60	10060	ENSG00000069431
ABCD4	Approved symbol	ABCD4	ATP binding cassette subfamily D member 4	14q24.3	HGNC:68	5826	ENSG00000119688
AC009948.5	Unmatched
ACAP2	Approved symbol	ACAP2	ArfGAP with coiled-coil, ankyrin repeat and PH domains 2	3q29	HGNC:16469	23527	ENSG00000114331
ACSL6	Approved symbol	ACSL6	acyl-CoA synthetase long chain family member 6	5q31.1	HGNC:16496	23305	ENSG00000164398
ADCK1	Approved symbol	ADCK1	aarF domain containing kinase 1	14q24.3	HGNC:19038	57143	ENSG00000063761
ADCY4	Approved symbol	ADCY4	adenylate cyclase 4	14q12	HGNC:235	196883	ENSG00000129467
ADCY6	Approved symbol	ADCY6	adenylate cyclase 6	12q13.12	HGNC:237	112	ENSG00000174233
AFG3L1P	Approved symbol	AFG3L1P	AFG3 like matrix AAA peptidase subunit 1, pseudogene	16q24.3	HGNC:314	172	ENSG00000223959
AGAP4	Approved symbol	AGAP4	ArfGAP with GTPase domain, ankyrin repeat and PH domain 4	10q11.22	HGNC:23459	119016	ENSG00000188234
AGAP5	Approved symbol	AGAP5	ArfGAP with GTPase domain, ankyrin repeat and PH domain 5	10q22.2	HGNC:23467	729092	ENSG00000172650
AGAP6	Approved symbol	AGAP6	ArfGAP with GTPase domain, ankyrin repeat and PH domain 6	10q11.23	HGNC:23466	414189	ENSG00000204149
AGAP7	Previous symbol	AGAP7P	ArfGAP with GTPase domain, ankyrin repeat and PH domain 7, pseudogene	10q11.22	HGNC:23465	653268	ENSG00000264204
AGAP9	Approved symbol	AGAP9	ArfGAP with GTPase domain, ankyrin repeat and PH domain 9	10q11.22	HGNC:23463	642517	ENSG00000204172
AHSA2	Previous symbol	AHSA2P	activator of HSP90 ATPase homolog 2, pseudogene	2p15	HGNC:20437	130872	ENSG00000173209
AKAP10	Approved symbol	AKAP10	A-kinase anchoring protein 10	17p11.2	HGNC:368	11216	ENSG00000108599
ALG10B	Approved symbol	ALG10B	ALG10B, alpha-1,2-glucosyltransferase	12q12	HGNC:31088	144245	ENSG00000175548
ALG11	Approved symbol	ALG11	ALG11, alpha-1,2-mannosyltransferase	13q14.3	HGNC:32456	440138	ENSG00000253710
ALS2CL	Approved symbol	ALS2CL	ALS2 C-terminal like	3p21.31	HGNC:20605	259173	ENSG00000178038
AMIGO3	Approved symbol	AMIGO3	adhesion molecule with Ig like domain 3	3p21.31	HGNC:24075	386724	ENSG00000176020
AMT	Approved symbol	AMT	aminomethyltransferase	3p21.31	HGNC:473	275	ENSG00000145020
AMY1A	Approved symbol	AMY1A	amylase, alpha 1A (salivary)	1p21.1	HGNC:474	276	ENSG00000237763
AMY1B	Approved symbol	AMY1B	amylase, alpha 1B (salivary)	1p21.1	HGNC:475	277	ENSG00000174876
AMY1C	Approved symbol	AMY1C	amylase, alpha 1C (salivary)	1p21.1	HGNC:476	278	ENSG00000187733
AMY2A	Approved symbol	AMY2A	amylase, alpha 2A (pancreatic)	1p21.1	HGNC:477	279	ENSG00000243480
AMY2B	Approved symbol	AMY2B	amylase, alpha 2B (pancreatic)	1p21.1	HGNC:478	280	ENSG00000240038
ANAPC4	Approved symbol	ANAPC4	anaphase promoting complex subunit 4	4p15.2	HGNC:19990	29945	ENSG00000053900
ANAPC7	Approved symbol	ANAPC7	anaphase promoting complex subunit 7	12q24.11	HGNC:17380	51434	ENSG00000196510
ANGEL1	Approved symbol	ANGEL1	angel homolog 1	14q24.3	HGNC:19961	23357	ENSG00000013523
ANKAR	Approved symbol	ANKAR	ankyrin and armadillo repeat containing	2q32.2	HGNC:26350	150709	ENSG00000151687
ANKRD10	Approved symbol	ANKRD10	ankyrin repeat domain 10	13q34	HGNC:20265	55608	ENSG00000088448
ANKRD13C	Approved symbol	ANKRD13C	ankyrin repeat domain 13C	1p31.1	HGNC:25374	81573	ENSG00000118454
ANKRD36	Approved symbol	ANKRD36	ankyrin repeat domain 36	2q11.2	HGNC:24079	375248	ENSG00000135976
ANKRD44	Approved symbol	ANKRD44	ankyrin repeat domain 44	2q33.1	HGNC:25259	91526	ENSG00000065413
ANKRD49	Approved symbol	ANKRD49	ankyrin repeat domain 49	11q21	HGNC:25970	54851	ENSG00000168876
ANKRD52	Approved symbol	ANKRD52	ankyrin repeat domain 52	12q13.3	HGNC:26614	283373	ENSG00000139645
ANKS1A	Approved symbol	ANKS1A	ankyrin repeat and sterile alpha motif domain containing 1A	6p21.31	HGNC:20961	23294	ENSG00000064999
ANKZF1	Approved symbol	ANKZF1	ankyrin repeat and zinc finger domain containing 1	2q35	HGNC:25527	55139	ENSG00000163516
AP4B1	Approved symbol	AP4B1	adaptor related protein complex 4 beta 1 subunit	1p13.2	HGNC:572	10717	ENSG00000134262
APBB3	Approved symbol	APBB3	amyloid beta precursor protein binding family B member 3	5q31.3	HGNC:20708	10307	ENSG00000113108
APH1B	Approved symbol	APH1B	aph-1 homolog B, gamma-secretase subunit	15q22.2	HGNC:24080	83464	ENSG00000138613
APOD	Approved symbol	APOD	apolipoprotein D	3q29	HGNC:612	347	ENSG00000189058
ARFIP1	Approved symbol	ARFIP1	ADP ribosylation factor interacting protein 1	4q31.3	HGNC:21496	27236	ENSG00000164144
ARGLU1	Approved symbol	ARGLU1	arginine and glutamate rich 1	13q33.3	HGNC:25482	55082	ENSG00000134884
ARHGAP32	Approved symbol	ARHGAP32	Rho GTPase activating protein 32	11q24.3	HGNC:17399	9743	ENSG00000134909
ARHGEF25	Approved symbol	ARHGEF25	Rho guanine nucleotide exchange factor 25	12q13.3	HGNC:30275	115557	ENSG00000240771
ARID4B	Approved symbol	ARID4B	AT-rich interaction domain 4B	1q42.3	HGNC:15550	51742	ENSG00000054267
ARL10	Approved symbol	ARL10	ADP ribosylation factor like GTPase 10	5q35.2	HGNC:22042	285598	ENSG00000175414
ARL17A	Approved symbol	ARL17A	ADP ribosylation factor like GTPase 17A	17q21.31	HGNC:24096	51326	ENSG00000185829
ARL17B	Approved symbol	ARL17B	ADP ribosylation factor like GTPase 17B	17q21.31	HGNC:32387	100506084	ENSG00000228696
ARRDC3	Approved symbol	ARRDC3	arrestin domain containing 3	5q14.3	HGNC:29263	57561	ENSG00000113369
ASAH2B	Approved symbol	ASAH2B	N-acylsphingosine amidohydrolase 2B	10q11.23	HGNC:23456	653308	ENSG00000204147
ASTE1	Approved symbol	ASTE1	asteroid homolog 1	3q22.1	HGNC:25021	28990	ENSG00000034533
ATAT1	Approved symbol	ATAT1	alpha tubulin acetyltransferase 1	6p21.33	HGNC:21186	79969	ENSG00000137343
ATF2	Approved symbol	ATF2	activating transcription factor 2	2q31.1	HGNC:784	1386	ENSG00000115966
ATG10	Approved symbol	ATG10	autophagy related 10	5q14.1-q14.2	HGNC:20315	83734	ENSG00000152348
ATG16L2	Approved symbol	ATG16L2	autophagy related 16 like 2	11q13.4	HGNC:25464	89849	ENSG00000168010
ATM	Approved symbol	ATM	ATM serine/threonine kinase	11q22.3	HGNC:795	472	ENSG00000149311
ATXN3	Approved symbol	ATXN3	ataxin 3	14q32.12	HGNC:7106	4287	ENSG00000066427
ATXN7L2	Approved symbol	ATXN7L2	ataxin 7 like 2	1p13.3	HGNC:28713	127002	ENSG00000162650
AVIL	Approved symbol	AVIL	advillin	12q14.1	HGNC:14188	10677	ENSG00000135407
BAZ2B	Approved symbol	BAZ2B	bromodomain adjacent to zinc finger domain 2B	2q24.2	HGNC:963	29994	ENSG00000123636
BDH2	Approved symbol	BDH2	3-hydroxybutyrate dehydrogenase 2	4q24	HGNC:32389	56898	ENSG00000164039
BEND3P3	Approved symbol	BEND3P3	BEN domain containing 3 pseudogene 3	10q22.3	HGNC:45016	650623	ENSG00000278616
BET1	Approved symbol	BET1	Bet1 golgi vesicular membrane trafficking protein	7q21.3	HGNC:14562	10282	ENSG00000105829
BLZF1	Approved symbol	BLZF1	basic leucine zipper nuclear factor 1	1q24.2	HGNC:1065	8548	ENSG00000117475
BMPER	Approved symbol	BMPER	BMP binding endothelial regulator	7p14.3	HGNC:24154	168667	ENSG00000164619
BMS1P6	Previous symbol	BMS1P2	BMS1, ribosome biogenesis factor pseudogene 2	10q11.22	HGNC:23650	642826	ENSG00000251079
BROX	Approved symbol	BROX	BRO1 domain and CAAX motif containing	1q41	HGNC:26512	148362	ENSG00000162819
BRWD3	Approved symbol	BRWD3	bromodomain and WD repeat domain containing 3	Xq21.1	HGNC:17342	254065	ENSG00000165288
BTAF1	Approved symbol	BTAF1	B-TFIID TATA-box binding protein associated factor 1	10q23.32	HGNC:17307	9044	ENSG00000095564
BTBD3	Approved symbol	BTBD3	BTB domain containing 3	20p12.2	HGNC:15854	22903	ENSG00000132640
C11orf30	Previous symbol	EMSY	EMSY, BRCA2 interacting transcriptional repressor	11q13.5	HGNC:18071	56946	ENSG00000158636
C15orf57	Previous symbol	CCDC32	coiled-coil domain containing 32	15q15.1	HGNC:28295	90416	ENSG00000128891
C1orf162	Approved symbol	C1orf162	chromosome 1 open reading frame 162	1p13.2	HGNC:28344	128346	ENSG00000143110
C1orf213	Previous symbol	ZNF436-AS1	ZNF436 antisense RNA 1	1p36.12	HGNC:25122	148898	ENSG00000249087
C1orf63	Previous symbol	RSRP1	arginine and serine rich protein 1	1p36.11	HGNC:25234	57035	ENSG00000117616
C2CD5	Approved symbol	C2CD5	C2 calcium dependent domain containing 5	12p12.1	HGNC:29062	9847	ENSG00000111731
C3orf38	Approved symbol	C3orf38	chromosome 3 open reading frame 38	3p11.1	HGNC:28384	285237	ENSG00000179021
C4orf21	Previous symbol	ZGRF1	zinc finger GRF-type containing 1	4q25	HGNC:25654	55345	ENSG00000138658
C4orf33	Approved symbol	C4orf33	chromosome 4 open reading frame 33	4q28.2	HGNC:27025	132321	ENSG00000151470
C5orf30	Approved symbol	C5orf30	chromosome 5 open reading frame 30	5q21.1	HGNC:25052	90355	ENSG00000181751
C5orf54	Previous symbol	ZBED8	zinc finger BED-type containing 8	5q33.3	HGNC:30804	63920	ENSG00000221886
C8orf44	Approved symbol	C8orf44	chromosome 8 open reading frame 44	8q13.1	HGNC:25646	56260	ENSG00000213865
C9orf114	Previous symbol	SPOUT1	SPOUT domain containing methyltransferase 1	9q34.11	HGNC:26933	51490	ENSG00000198917
CADM1	Approved symbol	CADM1	cell adhesion molecule 1	11q23.3	HGNC:5951	23705	ENSG00000182985
CAMKMT	Approved symbol	CAMKMT	calmodulin-lysine N-methyltransferase	2p21	HGNC:26276	79823	ENSG00000143919
CAND1	Approved symbol	CAND1	cullin associated and neddylation dissociated 1	12q14.3-q15	HGNC:30688	55832	ENSG00000111530
CAPN10	Approved symbol	CAPN10	calpain 10	2q37.3	HGNC:1477	11132	ENSG00000142330
CAPRIN1	Approved symbol	CAPRIN1	cell cycle associated protein 1	11p13	HGNC:6743	4076	ENSG00000135387
CAPRIN2	Approved symbol	CAPRIN2	caprin family member 2	12p11.21	HGNC:21259	65981	ENSG00000110888
CAPS2	Approved symbol	CAPS2	calcyphosine 2	12q21.1-q21.2	HGNC:16471	84698	ENSG00000180881
CARF	Approved symbol	CARF	calcium responsive transcription factor	2q33.2	HGNC:14435	79800	ENSG00000138380
CASP2	Approved symbol	CASP2	caspase 2	7q34	HGNC:1503	835	ENSG00000106144
CCDC121	Approved symbol	CCDC121	coiled-coil domain containing 121	2p23.3	HGNC:25833	79635	ENSG00000176714
CCDC14	Approved symbol	CCDC14	coiled-coil domain containing 14	3q21.1	HGNC:25766	64770	ENSG00000175455
CCDC66	Approved symbol	CCDC66	coiled-coil domain containing 66	3p14.3	HGNC:27709	285331	ENSG00000180376
CCDC82	Approved symbol	CCDC82	coiled-coil domain containing 82	11q21	HGNC:26282	79780	ENSG00000149231
CCDC84	Approved symbol	CCDC84	coiled-coil domain containing 84	11q23.3	HGNC:30460	338657	ENSG00000186166
CCNL2	Approved symbol	CCNL2	cyclin L2	1p36.33	HGNC:20570	81669	ENSG00000221978
CCNT2	Approved symbol	CCNT2	cyclin T2	2q21.3	HGNC:1600	905	ENSG00000082258
CCP110	Approved symbol	CCP110	centriolar coiled-coil protein 110	16p12.3	HGNC:24342	9738	ENSG00000103540
CCT6P1	Approved symbol	CCT6P1	chaperonin containing TCP1 subunit 6 pseudogene 1	7q11.21	HGNC:33094	643253	ENSG00000228409
CD27-AS1	Approved symbol	CD27-AS1	CD27 antisense RNA 1	12p13.31	HGNC:43896	678655	ENSG00000215039
CDC23	Approved symbol	CDC23	cell division cycle 23	5q31.2	HGNC:1724	8697	ENSG00000094880
CDH23	Approved symbol	CDH23	cadherin related 23	10q22.1	HGNC:13733	64072	ENSG00000107736
CDK13	Approved symbol	CDK13	cyclin dependent kinase 13	7p14.1	HGNC:1733	8621	ENSG00000065883
CDK19	Approved symbol	CDK19	cyclin dependent kinase 19	6q21	HGNC:19338	23097	ENSG00000155111
CDKL3	Approved symbol	CDKL3	cyclin dependent kinase like 3	5q31.1	HGNC:15483	51265	ENSG00000006837
CEACAM19	Approved symbol	CEACAM19	carcinoembryonic antigen related cell adhesion molecule 19	19q13.31	HGNC:31951	56971	ENSG00000186567
CEP290	Approved symbol	CEP290	centrosomal protein 290	12q21.32	HGNC:29021	80184	ENSG00000198707
CEP44	Approved symbol	CEP44	centrosomal protein 44	4q34.1	HGNC:29356	80817	ENSG00000164118
CEP57L1	Approved symbol	CEP57L1	centrosomal protein 57 like 1	6q21	HGNC:21561	285753	ENSG00000183137
CEP78	Approved symbol	CEP78	centrosomal protein 78	9q21.2	HGNC:25740	84131	ENSG00000148019
CEP95	Approved symbol	CEP95	centrosomal protein 95	17q23.3	HGNC:25141	90799	ENSG00000258890
CFLAR	Approved symbol	CFLAR	CASP8 and FADD like apoptosis regulator	2q33.1	HGNC:1876	8837	ENSG00000003402
CHD9	Approved symbol	CHD9	chromodomain helicase DNA binding protein 9	16q12.2	HGNC:25701	80205	ENSG00000177200
CHKA	Approved symbol	CHKA	choline kinase alpha	11q13.2	HGNC:1937	1119	ENSG00000110721
CLK1	Approved symbol	CLK1	CDC like kinase 1	2q33.1	HGNC:2068	1195	ENSG00000013441
CLK2	Approved symbol	CLK2	CDC like kinase 2	1q22	HGNC:2069	1196	ENSG00000176444
CLK4	Approved symbol	CLK4	CDC like kinase 4	5q35.3	HGNC:13659	57396	ENSG00000113240
CMSS1	Approved symbol	CMSS1	cms1 ribosomal small subunit homolog (yeast)	3q12.1	HGNC:28666	84319	ENSG00000184220
CNTRL	Approved symbol	CNTRL	centriolin	9q33.2	HGNC:1858	11064	ENSG00000119397
COG3	Approved symbol	COG3	component of oligomeric golgi complex 3	13q14.13	HGNC:18619	83548	ENSG00000136152
COIL	Approved symbol	COIL	coilin	17q22	HGNC:2184	8161	ENSG00000121058
COL27A1	Approved symbol	COL27A1	collagen type XXVII alpha 1 chain	9q32	HGNC:22986	85301	ENSG00000196739
COL28A1	Approved symbol	COL28A1	collagen type XXVIII alpha 1 chain	7p21.3	HGNC:22442	340267	ENSG00000215018
COL4A3	Approved symbol	COL4A3	collagen type IV alpha 3 chain	2q36.3	HGNC:2204	1285	ENSG00000169031
COL4A4	Approved symbol	COL4A4	collagen type IV alpha 4 chain	2q36.3	HGNC:2206	1286	ENSG00000081052
COL4A5	Approved symbol	COL4A5	collagen type IV alpha 5 chain	Xq22.3	HGNC:2207	1287	ENSG00000188153
COL7A1	Approved symbol	COL7A1	collagen type VII alpha 1 chain	3p21.31	HGNC:2214	1294	ENSG00000114270
COX18	Approved symbol	COX18	COX18, cytochrome c oxidase assembly factor	4q13.3	HGNC:26801	285521	ENSG00000163626
CPNE1	Approved symbol	CPNE1	copine 1	20q11.22	HGNC:2314	8904	ENSG00000214078
CPSF7	Approved symbol	CPSF7	cleavage and polyadenylation specific factor 7	11q12.2	HGNC:30098	79869	ENSG00000149532
CREBZF	Approved symbol	CREBZF	CREB/ATF bZIP transcription factor	11q14.1	HGNC:24905	58487	ENSG00000137504
CSAD	Approved symbol	CSAD	cysteine sulfinic acid decarboxylase	12q13.13	HGNC:18966	51380	ENSG00000139631
CSPP1	Approved symbol	CSPP1	centrosome and spindle pole associated protein 1	8q13.1-q13.2	HGNC:26193	79848	ENSG00000104218
CTDSPL2	Approved symbol	CTDSPL2	CTD small phosphatase like 2	15q15.3-q21.1	HGNC:26936	51496	ENSG00000137770
CTGLF12P	Previous symbol	AGAP12P	ArfGAP with GTPase domain, ankyrin repeat and PH domain 12, pseudogene	10q11.22	HGNC:23661	414224	ENSG00000265018
CXorf23	Previous symbol	BCLAF3	BCLAF1 and THRAP3 family member 3	Xp22.12	HGNC:27413	256643	ENSG00000173681
CXorf38	Approved symbol	CXorf38	chromosome X open reading frame 38	Xp11.4	HGNC:28589	159013	ENSG00000185753
CYP2R1	Approved symbol	CYP2R1	cytochrome P450 family 2 subfamily R member 1	11p15.2	HGNC:20580	120227	ENSG00000186104
DCAF10	Approved symbol	DCAF10	DDB1 and CUL4 associated factor 10	9p13.2	HGNC:23686	79269	ENSG00000122741
DCAF16	Approved symbol	DCAF16	DDB1 and CUL4 associated factor 16	4p15.31	HGNC:25987	54876	ENSG00000163257
DCAF17	Approved symbol	DCAF17	DDB1 and CUL4 associated factor 17	2q31.1	HGNC:25784	80067	ENSG00000115827
DCUN1D4	Approved symbol	DCUN1D4	defective in cullin neddylation 1 domain containing 4	4q12	HGNC:28998	23142	ENSG00000109184
DENND2C	Approved symbol	DENND2C	DENN domain containing 2C	1p13.2	HGNC:24748	163259	ENSG00000175984
DHRS3	Approved symbol	DHRS3	dehydrogenase/reductase 3	1p36.21	HGNC:17693	9249	ENSG00000162496
DHX35	Approved symbol	DHX35	DEAH-box helicase 35	20q11.23-q12	HGNC:15861	60625	ENSG00000101452
DHX58	Approved symbol	DHX58	DExH-box helicase 58	17q21.2	HGNC:29517	79132	ENSG00000108771
DIP2A	Approved symbol	DIP2A	disco interacting protein 2 homolog A	21q22.3	HGNC:17217	23181	ENSG00000160305
DMRTA1	Approved symbol	DMRTA1	DMRT like family A1	9p21.3	HGNC:13826	63951	ENSG00000176399
DMTF1	Approved symbol	DMTF1	cyclin D binding myb like transcription factor 1	7q21.12	HGNC:14603	9988	ENSG00000135164
DMXL1	Approved symbol	DMXL1	Dmx like 1	5q23.1	HGNC:2937	1657	ENSG00000172869
DNAH1	Approved symbol	DNAH1	dynein axonemal heavy chain 1	3p21.1	HGNC:2940	25981	ENSG00000114841
DNAJB14	Approved symbol	DNAJB14	DnaJ heat shock protein family (Hsp40) member B14	4q23	HGNC:25881	79982	ENSG00000164031
DNAJC18	Approved symbol	DNAJC18	DnaJ heat shock protein family (Hsp40) member C18	5q31.2	HGNC:28429	202052	ENSG00000170464
DNAL1	Approved symbol	DNAL1	dynein axonemal light chain 1	14q24.3	HGNC:23247	83544	ENSG00000119661
DNHD1	Approved symbol	DNHD1	dynein heavy chain domain 1	11p15.4	HGNC:26532	144132	ENSG00000179532
DOCK3	Approved symbol	DOCK3	dedicator of cytokinesis 3	3p21.2	HGNC:2989	1795	ENSG00000088538
DPH7	Approved symbol	DPH7	diphthamide biosynthesis 7	9q34.3	HGNC:25199	92715	ENSG00000148399
DSN1	Approved symbol	DSN1	DSN1 homolog, MIS12 kinetochore complex component	20q11.23	HGNC:16165	79980	ENSG00000149636
DTWD1	Approved symbol	DTWD1	DTW domain containing 1	15q21.2	HGNC:30926	56986	ENSG00000104047
DTX3	Approved symbol	DTX3	deltex E3 ubiquitin ligase 3	12q13.3	HGNC:24457	196403	ENSG00000178498
DUSP11	Approved symbol	DUSP11	dual specificity phosphatase 11	2p13.1	HGNC:3066	8446	ENSG00000144048
EBF3	Approved symbol	EBF3	early B cell factor 3	10q26.3	HGNC:19087	253738	ENSG00000108001
EBPL	Approved symbol	EBPL	emopamil binding protein like	13q14.2	HGNC:18061	84650	ENSG00000123179
ECHDC2	Approved symbol	ECHDC2	enoyl-CoA hydratase domain containing 2	1p32.3	HGNC:23408	55268	ENSG00000121310
EFHC1	Approved symbol	EFHC1	EF-hand domain containing 1	6p12.2	HGNC:16406	114327	ENSG00000096093
EIF2AK2	Approved symbol	EIF2AK2	eukaryotic translation initiation factor 2 alpha kinase 2	2p22.2	HGNC:9437	5610	ENSG00000055332
ELK4	Approved symbol	ELK4	ELK4, ETS transcription factor	1q32.1	HGNC:3326	2005	ENSG00000158711
EMC10	Approved symbol	EMC10	ER membrane protein complex subunit 10	19q13.33	HGNC:27609	284361	ENSG00000161671
EML5	Approved symbol	EML5	echinoderm microtubule associated protein like 5	14q31.3	HGNC:18197	161436	ENSG00000165521
EPB41L1	Approved symbol	EPB41L1	erythrocyte membrane protein band 4.1 like 1	20q11.23	HGNC:3378	2036	ENSG00000088367
EPB41L5	Approved symbol	EPB41L5	erythrocyte membrane protein band 4.1 like 5	2q14.2	HGNC:19819	57669	ENSG00000115109
EPOR	Approved symbol	EPOR	erythropoietin receptor	19p13.2	HGNC:3416	2057	ENSG00000187266
ERBB4	Approved symbol	ERBB4	erb-b2 receptor tyrosine kinase 4	2q34	HGNC:3432	2066	ENSG00000178568
ERMARD	Approved symbol	ERMARD	ER membrane associated RNA degradation	6q27	HGNC:21056	55780	ENSG00000130023
ETAA1	Approved symbol	ETAA1	ETAA1, ATR kinase activator	2p14	HGNC:24648	54465	ENSG00000143971
ETNK1	Approved symbol	ETNK1	ethanolamine kinase 1	12p12.1	HGNC:24649	55500	ENSG00000139163
EXOC1	Approved symbol	EXOC1	exocyst complex component 1	4q12	HGNC:30380	55763	ENSG00000090989
EXOG	Approved symbol	EXOG	exo/endonuclease G	3p22.2	HGNC:3347	9941	ENSG00000157036
EXOSC8	Approved symbol	EXOSC8	exosome component 8	13q13.3	HGNC:17035	11340	ENSG00000120699
EXTL2	Approved symbol	EXTL2	exostosin like glycosyltransferase 2	1p21.2	HGNC:3516	2135	ENSG00000162694
FAIM	Approved symbol	FAIM	Fas apoptotic inhibitory molecule	3q22.3	HGNC:18703	55179	ENSG00000158234
FAM111A	Approved symbol	FAM111A	family with sequence similarity 111 member A	11q12.1	HGNC:24725	63901	ENSG00000166801
FAM126B	Approved symbol	FAM126B	family with sequence similarity 126 member B	2q33.1	HGNC:28593	285172	ENSG00000155744
FAM156A	Approved symbol	FAM156A	family with sequence similarity 156 member A	Xp11.22	HGNC:30114	29057	ENSG00000268350
FAM156B	Approved symbol	FAM156B	family with sequence similarity 156 member B	Xp11.22	HGNC:31962	727866	ENSG00000179304
FAM161A	Approved symbol	FAM161A	family with sequence similarity 161 member A	2p15	HGNC:25808	84140	ENSG00000170264
FAM184B	Approved symbol	FAM184B	family with sequence similarity 184 member B	4p15.32-p15.31	HGNC:29235	27146	ENSG00000047662
FAM206A	Approved symbol	FAM206A	family with sequence similarity 206 member A	9q31.3	HGNC:1364	54942	ENSG00000119328
FAM214A	Approved symbol	FAM214A	family with sequence similarity 214 member A	15q21.2-q21.3	HGNC:25609	56204	ENSG00000047346
FAM76B	Approved symbol	FAM76B	family with sequence similarity 76 member B	11q21	HGNC:28492	143684	ENSG00000077458
FAM8A1	Approved symbol	FAM8A1	family with sequence similarity 8 member A1	6p22.3	HGNC:16372	51439	ENSG00000137414
FAS	Approved symbol	FAS	Fas cell surface death receptor	10q23.31	HGNC:11920	355	ENSG00000026103
FCHO2	Approved symbol	FCHO2	FCH domain only 2	5q13.2	HGNC:25180	115548	ENSG00000157107
FGFR1OP2	Approved symbol	FGFR1OP2	FGFR1 oncogene partner 2	12p11.23	HGNC:23098	26127	ENSG00000111790
FKTN	Approved symbol	FKTN	fukutin	9q31.2	HGNC:3622	2218	ENSG00000106692
FLJ31306	Synonyms	PSMA3-AS1	PSMA3 antisense RNA 1	14q23.1	HGNC:26445	379025	ENSG00000257621
FLJ44342	Unmatched
FMO3	Approved symbol	FMO3	flavin containing monooxygenase 3	1q24.3	HGNC:3771	2328	ENSG00000007933
FNBP4	Approved symbol	FNBP4	formin binding protein 4	11p11.2	HGNC:19752	23360	ENSG00000109920
FNDC3A	Approved symbol	FNDC3A	fibronectin type III domain containing 3A	13q14.2	HGNC:20296	22862	ENSG00000102531
FRA10AC1	Approved symbol	FRA10AC1	FRA10A associated CGG repeat 1	10q23.33	HGNC:1162	118924	ENSG00000148690
FRS2	Approved symbol	FRS2	fibroblast growth factor receptor substrate 2	12q15	HGNC:16971	10818	ENSG00000166225
FUBP3	Approved symbol	FUBP3	far upstream element binding protein 3	9q34.11-q34.12	HGNC:4005	8939	ENSG00000107164
GAB3	Approved symbol	GAB3	GRB2 associated binding protein 3	Xq28	HGNC:17515	139716	ENSG00000160219
GABBR1	Approved symbol	GABBR1	gamma-aminobutyric acid type B receptor subunit 1	6p22.1	HGNC:4070	2550	ENSG00000204681
GABPB2	Approved symbol	GABPB2	GA binding protein transcription factor beta subunit 2	1q21.3	HGNC:28441	126626	ENSG00000143458
GARNL3	Approved symbol	GARNL3	GTPase activating Rap/RanGAP domain like 3	9q33.3	HGNC:25425	84253	ENSG00000136895
GATAD1	Approved symbol	GATAD1	GATA zinc finger domain containing 1	7q21.2	HGNC:29941	57798	ENSG00000157259
GCC2	Approved symbol	GCC2	GRIP and coiled-coil domain containing 2	2q12.3	HGNC:23218	9648	ENSG00000135968
GEMIN8	Approved symbol	GEMIN8	gem nuclear organelle associated protein 8	Xp22.2	HGNC:26044	54960	ENSG00000046647
GEN1	Approved symbol	GEN1	GEN1, Holliday junction 5' flap endonuclease	2p24.2	HGNC:26881	348654	ENSG00000178295
GGCX	Approved symbol	GGCX	gamma-glutamyl carboxylase	2p11.2	HGNC:4247	2677	ENSG00000115486
GK5	Approved symbol	GK5	glycerol kinase 5 (putative)	3q23	HGNC:28635	256356	ENSG00000175066
GOLGA6L10	Approved symbol	GOLGA6L10	golgin A6 family-like 10	15q25.2	HGNC:37228	647042	ENSG00000278662
GOLGA6L4	Approved symbol	GOLGA6L4	golgin A6 family-like 4	15q25.2	HGNC:27256	643707	ENSG00000184206
GOLGA6L5P	Approved symbol	GOLGA6L5P	golgin A6 family-like 5, pseudogene	15q25.2	HGNC:30472	374650	ENSG00000230373
GOLGA6L9	Approved symbol	GOLGA6L9	golgin A6 family-like 9	15q25.2	HGNC:37229	440295	ENSG00000197978
GOLGA7B	Approved symbol	GOLGA7B	golgin A7 family member B	10q24.2	HGNC:31668	401647	ENSG00000155265
GOLGA8A	Approved symbol	GOLGA8A	golgin A8 family member A	15q14	HGNC:31972	23015	ENSG00000175265
GOLGA8B	Approved symbol	GOLGA8B	golgin A8 family member B	15q14	HGNC:31973	440270	ENSG00000215252
GOLGA8N	Approved symbol	GOLGA8N	golgin A8 family member N	15q13.3	HGNC:44405	643699	ENSG00000232653
GOLGA8O	Approved symbol	GOLGA8O	golgin A8 family member O	15q13.3	HGNC:44406	728047	ENSG00000206127
GOLGA8R	Approved symbol	GOLGA8R	golgin A8 family member R	15q13.2	HGNC:44407	101059918	ENSG00000186399
GPALPP1	Approved symbol	GPALPP1	GPALPP motifs containing 1	13q14.12	HGNC:20298	55425	ENSG00000133114
GPATCH2	Approved symbol	GPATCH2	G-patch domain containing 2	1q41	HGNC:25499	55105	ENSG00000092978
GPRASP1	Approved symbol	GPRASP1	G protein-coupled receptor associated sorting protein 1	Xq22.1	HGNC:24834	9737	ENSG00000198932
GREB1L	Approved symbol	GREB1L	growth regulation by estrogen in breast cancer 1 like	18q11.1-q11.2	HGNC:31042	80000	ENSG00000141449
GTF2H2	Approved symbol	GTF2H2	general transcription factor IIH subunit 2	5q13.2	HGNC:4656	2966	ENSG00000145736
GTF2H2B	Approved symbol	GTF2H2B	general transcription factor IIH subunit 2B (pseudogene)	5q13.2	HGNC:31393	653238	ENSG00000226259
GTF2H2C	Approved symbol	GTF2H2C	GTF2H2 family member C	5q13.2	HGNC:31394	728340	ENSG00000183474
GTF2H4	Approved symbol	GTF2H4	general transcription factor IIH subunit 4	6p21.33	HGNC:4658	2968	ENSG00000213780
GTF3C3	Approved symbol	GTF3C3	general transcription factor IIIC subunit 3	2q33.1	HGNC:4666	9330	ENSG00000119041
GUSBP11	Approved symbol	GUSBP11	glucuronidase, beta pseudogene 11	22q11.23	HGNC:42325	91316	ENSG00000228315
HACE1	Approved symbol	HACE1	HECT domain and ankyrin repeat containing E3 ubiquitin protein ligase 1	6q16.3	HGNC:21033	57531	ENSG00000085382
HECTD4	Approved symbol	HECTD4	HECT domain E3 ubiquitin protein ligase 4	12q24.13	HGNC:26611	283450	ENSG00000173064
HERC2P2	Approved symbol	HERC2P2	hect domain and RLD 2 pseudogene 2	15q11.2	HGNC:4870	400322	ENSG00000276550
HERC2P3	Approved symbol	HERC2P3	hect domain and RLD 2 pseudogene 3	15q11.1-q11.2	HGNC:4871	283755	ENSG00000180229
HERC2P9	Approved symbol	HERC2P9	hect domain and RLD 2 pseudogene 9	15q13.1	HGNC:30495	440248	ENSG00000206149
HIF3A	Approved symbol	HIF3A	hypoxia inducible factor 3 alpha subunit	19q13.32	HGNC:15825	64344	ENSG00000124440
HILS1	Approved symbol	HILS1	histone linker H1 domain, spermatid-specific 1 (pseudogene)	17q21.33	HGNC:30616	373861	ENSG00000188662
HMBOX1	Approved symbol	HMBOX1	homeobox containing 1	8p21.1-p12	HGNC:26137	79618	ENSG00000147421
HMGB2	Approved symbol	HMGB2	high mobility group box 2	4q34.1	HGNC:5000	3148	ENSG00000164104
HNRNPU-AS1	Previous symbol	HNRNPU	heterogeneous nuclear ribonucleoprotein U	1q44	HGNC:5048	3192	ENSG00000153187
HOXB3	Approved symbol	HOXB3	homeobox B3	17q21.32	HGNC:5114	3213	ENSG00000120093
HSPBAP1	Approved symbol	HSPBAP1	HSPB1 associated protein 1	3q21.1	HGNC:16389	79663	ENSG00000169087
ICK	Approved symbol	ICK	intestinal cell kinase	6p12.1	HGNC:21219	22858	ENSG00000112144
IFT172	Approved symbol	IFT172	intraflagellar transport 172	2p23.3	HGNC:30391	26160	ENSG00000138002
IFT80	Approved symbol	IFT80	intraflagellar transport 80	3q25.33	HGNC:29262	57560	ENSG00000068885
IKBKB	Approved symbol	IKBKB	inhibitor of nuclear factor kappa B kinase subunit beta	8p11.21	HGNC:5960	3551	ENSG00000104365
IL17RB	Approved symbol	IL17RB	interleukin 17 receptor B	3p21.1	HGNC:18015	55540	ENSG00000056736
INO80D	Approved symbol	INO80D	INO80 complex subunit D	2q33.3	HGNC:25997	54891	ENSG00000114933
INPP5B	Approved symbol	INPP5B	inositol polyphosphate-5-phosphatase B	1p34.3	HGNC:6077	3633	ENSG00000204084
INTS8	Approved symbol	INTS8	integrator complex subunit 8	8q22.1	HGNC:26048	55656	ENSG00000164941
INTU	Approved symbol	INTU	inturned planar cell polarity protein	4q28.1	HGNC:29239	27152	ENSG00000164066
INVS	Approved symbol	INVS	inversin	9q31.1	HGNC:17870	27130	ENSG00000119509
ITFG2	Approved symbol	ITFG2	integrin alpha FG-GAP repeat containing 2	12p13.33	HGNC:30879	55846	ENSG00000111203
ITIH6	Approved symbol	ITIH6	inter-alpha-trypsin inhibitor heavy chain family member 6	Xp11.22	HGNC:28907	347365	ENSG00000102313
JKAMP	Approved symbol	JKAMP	JNK1/MAPK8 associated membrane protein	14q23.1	HGNC:20184	51528	ENSG00000050130
JRK	Approved symbol	JRK	Jrk helix-turn-helix protein	8q24.3	HGNC:6199	8629	ENSG00000234616
KAT2A	Approved symbol	KAT2A	lysine acetyltransferase 2A	17q21.2	HGNC:4201	2648	ENSG00000108773
KBTBD6	Approved symbol	KBTBD6	kelch repeat and BTB domain containing 6	13q14.11	HGNC:25340	89890	ENSG00000165572
KCNJ2	Approved symbol	KCNJ2	potassium voltage-gated channel subfamily J member 2	17q24.3	HGNC:6263	3759	ENSG00000123700
KCTD3	Approved symbol	KCTD3	potassium channel tetramerization domain containing 3	1q41	HGNC:21305	51133	ENSG00000136636
KDM5D	Approved symbol	KDM5D	lysine demethylase 5D	Yq11.223	HGNC:11115	8284	ENSG00000012817
KIAA0355	Approved symbol	KIAA0355	KIAA0355	19q13.11	HGNC:29016	9710	ENSG00000166398
KIAA0895	Approved symbol	KIAA0895	KIAA0895	7p14.2	HGNC:22206	23366	ENSG00000164542
KIAA1033	Previous symbol	WASHC4	WASH complex subunit 4	12q23.3	HGNC:29174	23325	ENSG00000136051
KIAA1147	Approved symbol	KIAA1147	KIAA1147	7q34	HGNC:29472	57189	ENSG00000257093
KIAA1467	Previous symbol	FAM234B	family with sequence similarity 234 member B	12p13.1	HGNC:29288	57613	ENSG00000084444
KIAA1468	Approved symbol	KIAA1468	KIAA1468	18q21.33	HGNC:29289	57614	ENSG00000134444
KIAA1652	Unmatched
KIF27	Approved symbol	KIF27	kinesin family member 27	9q21.32	HGNC:18632	55582	ENSG00000165115
KIN	Approved symbol	KIN	Kin17 DNA and RNA binding protein	10p14	HGNC:6327	22944	ENSG00000151657
KLF8	Approved symbol	KLF8	Kruppel like factor 8	Xp11.21	HGNC:6351	11279	ENSG00000102349
KLHDC1	Approved symbol	KLHDC1	kelch domain containing 1	14q21.3	HGNC:19836	122773	ENSG00000197776
KLHL11	Approved symbol	KLHL11	kelch like family member 11	17q21.2	HGNC:19008	55175	ENSG00000178502
KRCC1	Approved symbol	KRCC1	lysine rich coiled-coil 1	2p11.2	HGNC:28039	51315	ENSG00000172086
L3MBTL1	Approved symbol	L3MBTL1	L3MBTL1, histone methyl-lysine binding protein	20q13.12	HGNC:15905	26013	ENSG00000185513
LAS1L	Approved symbol	LAS1L	LAS1 like, ribosome biogenesis factor	Xq12	HGNC:25726	81887	ENSG00000001497
LCLAT1	Approved symbol	LCLAT1	lysocardiolipin acyltransferase 1	2p23.1	HGNC:26756	253558	ENSG00000172954
LENG8	Approved symbol	LENG8	leukocyte receptor cluster member 8	19q13.42	HGNC:15500	114823	ENSG00000167615
LGI4	Approved symbol	LGI4	leucine rich repeat LGI family member 4	19q13.12	HGNC:18712	163175	ENSG00000153902
LIMK2	Approved symbol	LIMK2	LIM domain kinase 2	22q12.2	HGNC:6614	3985	ENSG00000182541
LINC00310	Approved symbol	LINC00310	long intergenic non-protein coding RNA 310	21q22.11	HGNC:16414	114036	ENSG00000227456
LINC01000	Approved symbol	LINC01000	long intergenic non-protein coding RNA 1000	7q32.1	HGNC:38541	402483
LINC01001	Approved symbol	LINC01001	long intergenic non-protein coding RNA 1001	11p15.5	HGNC:38540	100133161	ENSG00000230724
LINC01004	Approved symbol	LINC01004	long intergenic non-protein coding RNA 1004	7q22.3	HGNC:48961	100216546	ENSG00000228393
LINC01061	Approved symbol	LINC01061	long intergenic non-protein coding RNA 1061	4q26	HGNC:49084	401149
LINC01089	Approved symbol	LINC01089	long intergenic non-protein coding RNA 1089	12q24.31	HGNC:27886	338799	ENSG00000212694
LINS	Previous symbol	LINS1	lines homolog 1	15q26.3	HGNC:30922	55180	ENSG00000140471
LMBR1L	Approved symbol	LMBR1L	limb development membrane protein 1 like	12q13.12	HGNC:18268	55716	ENSG00000139636
LMBRD1	Approved symbol	LMBRD1	LMBR1 domain containing 1	6q13	HGNC:23038	55788	ENSG00000168216
LMLN	Approved symbol	LMLN	leishmanolysin like peptidase	3q29	HGNC:15991	89782	ENSG00000185621
LOC100128288	Unmatched
LOC100129550	Unmatched
LOC100129637	Unmatched
LOC100132352	Unmatched
LOC100133331	Unmatched
LOC100506114	Unmatched
LOC100506710	Synonyms	EBLN3P	endogenous Bornavirus-like nucleoprotein 3, pseudogene	9p13.2	HGNC:50682	100506710	ENSG00000281649
LOC100507520	Unmatched
LOC100996497	Unmatched
LOC101060321	Unmatched
LOC101060581	Unmatched
LOC101928068	Unmatched
LOC101928451	Unmatched
LOC101928882	Unmatched
LOC101929340	Unmatched
LOC101929385	Unmatched
LOC101929396	Unmatched
LOC101929426	Unmatched
LOC101930307	Unmatched
LOC102723566	Unmatched
LOC102724117	Unmatched
LOC102724445	Unmatched
LOC150776	Unmatched
LOC155060	Unmatched
LOC202181	Unmatched
LOC389765	Unmatched
LOC401320	Unmatched
LOC441155	Unmatched
LOC644794	Unmatched
LOC646471	Unmatched
LOC729737	Unmatched
LOC730102	Unmatched
LRIG2	Approved symbol	LRIG2	leucine rich repeats and immunoglobulin like domains 2	1p13.2	HGNC:20889	9860	ENSG00000198799
LSM8	Approved symbol	LSM8	LSM8 homolog, U6 small nuclear RNA associated	7q31.31	HGNC:20471	51691	ENSG00000128534
LTN1	Approved symbol	LTN1	listerin E3 ubiquitin protein ligase 1	21q21.3	HGNC:13082	26046	ENSG00000198862
LUC7L	Approved symbol	LUC7L	LUC7 like	16p13.3	HGNC:6723	55692	ENSG00000007392
LUC7L3	Approved symbol	LUC7L3	LUC7 like 3 pre-mRNA splicing factor	17q21.33	HGNC:24309	51747	ENSG00000108848
MALT1	Approved symbol	MALT1	MALT1 paracaspase	18q21.32	HGNC:6819	10892	ENSG00000172175
MAMDC4	Approved symbol	MAMDC4	MAM domain containing 4	9q34.3	HGNC:24083	158056	ENSG00000177943
MAP3K13	Approved symbol	MAP3K13	mitogen-activated protein kinase kinase kinase 13	3q27.2	HGNC:6852	9175	ENSG00000073803
MAP3K2	Approved symbol	MAP3K2	mitogen-activated protein kinase kinase kinase 2	2q14.3	HGNC:6854	10746	ENSG00000169967
MASP2	Approved symbol	MASP2	mannan binding lectin serine peptidase 2	1p36.22	HGNC:6902	10747	ENSG00000009724
MCM6	Approved symbol	MCM6	minichromosome maintenance complex component 6	2q21.3	HGNC:6949	4175	ENSG00000076003
MCM8	Approved symbol	MCM8	minichromosome maintenance 8 homologous recombination repair factor	20p12.3	HGNC:16147	84515	ENSG00000125885
MCTS1	Approved symbol	MCTS1	MCTS1, re-initiation and release factor	Xq24	HGNC:23357	28985	ENSG00000232119
MDM1	Approved symbol	MDM1	Mdm1 nuclear protein	12q15	HGNC:29917	56890	ENSG00000111554
MDM4	Approved symbol	MDM4	MDM4, p53 regulator	1q32.1	HGNC:6974	4194	ENSG00000198625
MED23	Approved symbol	MED23	mediator complex subunit 23	6q23.2	HGNC:2372	9439	ENSG00000112282
MED8	Approved symbol	MED8	mediator complex subunit 8	1p34.2	HGNC:19971	112950	ENSG00000159479
MEG3	Approved symbol	MEG3	maternally expressed 3 (non-protein coding)	14q32.2	HGNC:14575	55384	ENSG00000214548
MEGF10	Approved symbol	MEGF10	multiple EGF like domains 10	5q23.2	HGNC:29634	84466	ENSG00000145794
MESDC2	Previous symbol	MESD	mesoderm development LRP chaperone	15q13	HGNC:13520	23184	ENSG00000117899
METTL17	Approved symbol	METTL17	methyltransferase like 17	14q11.2	HGNC:19280	64745	ENSG00000165792
METTL3	Approved symbol	METTL3	methyltransferase like 3	14q11.2	HGNC:17563	56339	ENSG00000165819
MFSD5	Approved symbol	MFSD5	major facilitator superfamily domain containing 5	12q13.13	HGNC:28156	84975	ENSG00000182544
MFSD8	Approved symbol	MFSD8	major facilitator superfamily domain containing 8	4q28.2	HGNC:28486	256471	ENSG00000164073
MGC27345	Unmatched
MGEA5	Approved symbol	MGEA5	meningioma expressed antigen 5 (hyaluronidase)	10q24.32	HGNC:7056	10724	ENSG00000198408
MICAL3	Approved symbol	MICAL3	microtubule associated monooxygenase, calponin and LIM domain containing 3	22q11.21	HGNC:24694	57553	ENSG00000243156
MINPP1	Approved symbol	MINPP1	multiple inositol-polyphosphate phosphatase 1	10q23.2	HGNC:7102	9562	ENSG00000107789
MIPOL1	Approved symbol	MIPOL1	mirror-image polydactyly 1	14q13.3-q21.1	HGNC:21460	145282	ENSG00000151338
MIR600HG	Approved symbol	MIR600HG	MIR600 host gene	9q33.3	HGNC:23642	81571	ENSG00000236901
MLH3	Approved symbol	MLH3	mutL homolog 3	14q24.3	HGNC:7128	27030	ENSG00000119684
MLLT10	Approved symbol	MLLT10	MLLT10, histone lysine methyltransferase DOT1L cofactor	10p12.31	HGNC:16063	8028	ENSG00000078403
MON2	Approved symbol	MON2	MON2 homolog, regulator of endosome-to-Golgi trafficking	12q14.1	HGNC:29177	23041	ENSG00000061987
MPHOSPH8	Approved symbol	MPHOSPH8	M-phase phosphoprotein 8	13q12.11	HGNC:29810	54737	ENSG00000196199
MPHOSPH9	Approved symbol	MPHOSPH9	M-phase phosphoprotein 9	12q24.31	HGNC:7215	10198	ENSG00000051825
MRE11A	Previous symbol	MRE11	MRE11 homolog, double strand break repair nuclease	11q21	HGNC:7230	4361	ENSG00000020922
MRPS31P5	Approved symbol	MRPS31P5	mitochondrial ribosomal protein S31 pseudogene 5	13q14.3	HGNC:39253	100887750	ENSG00000243406
MSANTD2	Approved symbol	MSANTD2	Myb/SANT DNA binding domain containing 2	11q24.2	HGNC:26266	79684	ENSG00000120458
MTMR9LP	Approved symbol	MTMR9LP	myotubularin related protein 9-like, pseudogene	1p35.2	HGNC:27920	339483	ENSG00000220785
MTX3	Approved symbol	MTX3	metaxin 3	5q14.1	HGNC:24812	345778	ENSG00000177034
MYO15B	Approved symbol	MYO15B	myosin XVB	17q25.1	HGNC:14083	80022	ENSG00000266714
MYO5C	Approved symbol	MYO5C	myosin VC	15q21.2	HGNC:7604	55930	ENSG00000128833
MYO6	Approved symbol	MYO6	myosin VI	6q14.1	HGNC:7605	4646	ENSG00000196586
MYSM1	Approved symbol	MYSM1	Myb like, SWIRM and MPN domains 1	1p32.1	HGNC:29401	114803	ENSG00000162601
N4BP2L1	Approved symbol	N4BP2L1	NEDD4 binding protein 2 like 1	13q13.1	HGNC:25037	90634	ENSG00000139597
NAA16	Approved symbol	NAA16	N(alpha)-acetyltransferase 16, NatA auxiliary subunit	13q14.11	HGNC:26164	79612	ENSG00000172766
NAPB	Approved symbol	NAPB	NSF attachment protein beta	20p11.21	HGNC:15751	63908	ENSG00000125814
NASP	Approved symbol	NASP	nuclear autoantigenic sperm protein	1p34.1	HGNC:7644	4678	ENSG00000132780
NAV1	Approved symbol	NAV1	neuron navigator 1	1q32.1	HGNC:15989	89796	ENSG00000134369
NCRNA00185	Previous symbol	TTTY14	testis-specific transcript, Y-linked 14 (non-protein coding)	Yq11.222	HGNC:18495	83869	ENSG00000176728
NDST2	Approved symbol	NDST2	N-deacetylase and N-sulfotransferase 2	10q22.2	HGNC:7681	8509	ENSG00000166507
NEAT1	Approved symbol	NEAT1	nuclear paraspeckle assembly transcript 1 (non-protein coding)	11q13.1	HGNC:30815	283131	ENSG00000245532
NECAP1	Approved symbol	NECAP1	NECAP endocytosis associated 1	12p13.31	HGNC:24539	25977	ENSG00000089818
NFE2L3	Approved symbol	NFE2L3	nuclear factor, erythroid 2 like 3	7p15.2	HGNC:7783	9603	ENSG00000050344
NHLRC3	Approved symbol	NHLRC3	NHL repeat containing 3	13q13.3	HGNC:33751	387921	ENSG00000188811
NICN1	Approved symbol	NICN1	nicolin 1	3p21.31	HGNC:18317	84276	ENSG00000145029
NINL	Approved symbol	NINL	ninein like	20p11.21	HGNC:29163	22981	ENSG00000101004
NIPA1	Approved symbol	NIPA1	NIPA magnesium transporter 1	15q11.2	HGNC:17043	123606	ENSG00000170113
NIPAL2	Approved symbol	NIPAL2	NIPA like domain containing 2	8q22.2	HGNC:25854	79815	ENSG00000104361
NISCH	Approved symbol	NISCH	nischarin	3p21.1	HGNC:18006	11188	ENSG00000010322
NKAPL	Approved symbol	NKAPL	NFKB activating protein like	6p22.1	HGNC:21584	222698	ENSG00000189134
NKTR	Approved symbol	NKTR	natural killer cell triggering receptor	3p22.1	HGNC:7833	4820	ENSG00000114857
NMRK1	Approved symbol	NMRK1	nicotinamide riboside kinase 1	9q21.13	HGNC:26057	54981	ENSG00000106733
NNAT	Approved symbol	NNAT	neuronatin	20q11.23	HGNC:7860	4826	ENSG00000053438
NPAT	Approved symbol	NPAT	nuclear protein, coactivator of histone transcription	11q22.3	HGNC:7896	4863	ENSG00000149308
NPHP3	Approved symbol	NPHP3	nephrocystin 3	3q22.1	HGNC:7907	27031	ENSG00000113971
NR2C1	Approved symbol	NR2C1	nuclear receptor subfamily 2 group C member 1	12q22	HGNC:7971	7181	ENSG00000120798
NR2C2	Approved symbol	NR2C2	nuclear receptor subfamily 2 group C member 2	3p25.1	HGNC:7972	7182	ENSG00000177463
NRBP2	Approved symbol	NRBP2	nuclear receptor binding protein 2	8q24.3	HGNC:19339	340371	ENSG00000185189
NRIP2	Approved symbol	NRIP2	nuclear receptor interacting protein 2	12p13.33	HGNC:23078	83714	ENSG00000053702
NSUN5P1	Approved symbol	NSUN5P1	NOP2/Sun RNA methyltransferase family member 5 pseudogene 1	7q11.23	HGNC:19146	155400	ENSG00000223705
NSUN5P2	Approved symbol	NSUN5P2	NOP2/Sun RNA methyltransferase family member 5 pseudogene 2	7q11.23	HGNC:16609	260294	ENSG00000106133
NUP160	Approved symbol	NUP160	nucleoporin 160	11p11.2	HGNC:18017	23279	ENSG00000030066
NUP43	Approved symbol	NUP43	nucleoporin 43	6q25.1	HGNC:21182	348995	ENSG00000120253
NUP85	Approved symbol	NUP85	nucleoporin 85	17q25	HGNC:8734	79902	ENSG00000125450
NUPL2	Approved symbol	NUPL2	nucleoporin like 2	7p15.3	HGNC:17010	11097	ENSG00000136243
NUSAP1	Approved symbol	NUSAP1	nucleolar and spindle associated protein 1	15q14	HGNC:18538	51203	ENSG00000137804
NXF1	Approved symbol	NXF1	nuclear RNA export factor 1	11q12.3	HGNC:8071	10482	ENSG00000162231
OFD1	Approved symbol	OFD1	OFD1, centriole and centriolar satellite protein	Xp22.2	HGNC:2567	8481	ENSG00000046651
OPHN1	Approved symbol	OPHN1	oligophrenin 1	Xq12	HGNC:8148	4983	ENSG00000079482
ORMDL1	Approved symbol	ORMDL1	ORMDL sphingolipid biosynthesis regulator 1	2q32.2	HGNC:16036	94101	ENSG00000128699
OSBPL7	Approved symbol	OSBPL7	oxysterol binding protein like 7	17q21	HGNC:16387	114881	ENSG00000006025
OSCP1	Approved symbol	OSCP1	organic solute carrier partner 1	1p34.3	HGNC:29971	127700	ENSG00000116885
PAAF1	Approved symbol	PAAF1	proteasomal ATPase associated factor 1	11q13.4	HGNC:25687	80227	ENSG00000175575
PAN2	Approved symbol	PAN2	PAN2 poly(A) specific ribonuclease subunit	12q13.3	HGNC:20074	9924	ENSG00000135473
PAN3	Approved symbol	PAN3	PAN3 poly(A) specific ribonuclease subunit	13q12.2	HGNC:29991	255967	ENSG00000152520
PAPD4	Approved symbol	PAPD4	poly(A) RNA polymerase D4, non-canonical	5q14.1	HGNC:26776	167153	ENSG00000164329
PAPD5	Approved symbol	PAPD5	poly(A) RNA polymerase D5, non-canonical	16q12.1	HGNC:30758	64282	ENSG00000121274
PAQR3	Approved symbol	PAQR3	progestin and adipoQ receptor family member 3	4q21.21	HGNC:30130	152559	ENSG00000163291
PARN	Approved symbol	PARN	poly(A)-specific ribonuclease	16p13.12	HGNC:8609	5073	ENSG00000140694
PAXIP1	Approved symbol	PAXIP1	PAX interacting protein 1	7q36.2	HGNC:8624	22976	ENSG00000157212
PAXIP1-AS1	Approved symbol	PAXIP1-AS1	PAXIP1 antisense RNA 1 (head to head)	7q36.2	HGNC:27328	202781	ENSG00000273344
PCGF3	Approved symbol	PCGF3	polycomb group ring finger 3	4p16.3	HGNC:10066	10336	ENSG00000185619
PDCL	Approved symbol	PDCL	phosducin like	9q33.2	HGNC:8770	5082	ENSG00000136940
PDE4C	Approved symbol	PDE4C	phosphodiesterase 4C	19p13.11	HGNC:8782	5143	ENSG00000105650
PDE5A	Approved symbol	PDE5A	phosphodiesterase 5A	4q26	HGNC:8784	8654	ENSG00000138735
PGS1	Approved symbol	PGS1	phosphatidylglycerophosphate synthase 1	17q25.3	HGNC:30029	9489	ENSG00000087157
PHC3	Approved symbol	PHC3	polyhomeotic homolog 3	3q26.2	HGNC:15682	80012	ENSG00000173889
PHF8	Approved symbol	PHF8	PHD finger protein 8	Xp11.22	HGNC:20672	23133	ENSG00000172943
PHIP	Approved symbol	PHIP	pleckstrin homology domain interacting protein	6q14.1	HGNC:15673	55023	ENSG00000146247
PIGL	Approved symbol	PIGL	phosphatidylinositol glycan anchor biosynthesis class L	17p11.2	HGNC:8966	9487	ENSG00000108474
PIK3C2A	Approved symbol	PIK3C2A	phosphatidylinositol-4-phosphate 3-kinase catalytic subunit type 2 alpha	11p15.1	HGNC:8971	5286	ENSG00000011405
PKN2	Approved symbol	PKN2	protein kinase N2	1p22.2	HGNC:9406	5586	ENSG00000065243
PLAGL1	Approved symbol	PLAGL1	PLAG1 like zinc finger 1	6q24.2	HGNC:9046	5325	ENSG00000118495
PLCB4	Approved symbol	PLCB4	phospholipase C beta 4	20p12.3-p12.2	HGNC:9059	5332	ENSG00000101333
PLCG1	Approved symbol	PLCG1	phospholipase C gamma 1	20q12	HGNC:9065	5335	ENSG00000124181
PLEKHA8	Approved symbol	PLEKHA8	pleckstrin homology domain containing A8	7p14.3	HGNC:30037	84725	ENSG00000106086
PMS1	Approved symbol	PMS1	PMS1 homolog 1, mismatch repair system component	2q32.2	HGNC:9121	5378	ENSG00000064933
PNISR	Approved symbol	PNISR	PNN interacting serine and arginine rich protein	6q16.2	HGNC:21222	25957	ENSG00000132424
POGZ	Approved symbol	POGZ	pogo transposable element derived with ZNF domain	1q21.3	HGNC:18801	23126	ENSG00000143442
POLE	Approved symbol	POLE	DNA polymerase epsilon, catalytic subunit	12q24.33	HGNC:9177	5426	ENSG00000177084
POLI	Approved symbol	POLI	DNA polymerase iota	18q21.2	HGNC:9182	11201	ENSG00000101751
POLR3F	Approved symbol	POLR3F	RNA polymerase III subunit F	20p11.23	HGNC:15763	10621	ENSG00000132664
POT1	Approved symbol	POT1	protection of telomeres 1	7q31.33	HGNC:17284	25913	ENSG00000128513
POU2F1	Approved symbol	POU2F1	POU class 2 homeobox 1	1q24.2	HGNC:9212	5451	ENSG00000143190
PPAPDC1B	Previous symbol	PLPP5	phospholipid phosphatase 5	8p11.23	HGNC:25026	84513	ENSG00000147535
PPAPDC2	Previous symbol	PLPP6	phospholipid phosphatase 6	9p24.1	HGNC:23682	403313	ENSG00000205808
PPFIBP2	Approved symbol	PPFIBP2	PPFIA binding protein 2	11p15.4	HGNC:9250	8495	ENSG00000166387
PPIG	Approved symbol	PPIG	peptidylprolyl isomerase G	2q31.1	HGNC:14650	9360	ENSG00000138398
PPP1R12A	Approved symbol	PPP1R12A	protein phosphatase 1 regulatory subunit 12A	12q21.2-q21.31	HGNC:7618	4659	ENSG00000058272
PPP1R3E	Approved symbol	PPP1R3E	protein phosphatase 1 regulatory subunit 3E	14q11.2	HGNC:14943	90673	ENSG00000235194
PRDM10	Approved symbol	PRDM10	PR/SET domain 10	11q24.3	HGNC:13995	56980	ENSG00000170325
PRICKLE4	Approved symbol	PRICKLE4	prickle planar cell polarity protein 4	6p21.1	HGNC:16805	29964	ENSG00000278224
PROSER1	Approved symbol	PROSER1	proline and serine rich 1	13q13.3	HGNC:20291	80209	ENSG00000120685
PRPF3	Approved symbol	PRPF3	pre-mRNA processing factor 3	1q21.2	HGNC:17348	9129	ENSG00000117360
PRPF39	Approved symbol	PRPF39	pre-mRNA processing factor 39	14q21.2	HGNC:20314	55015	ENSG00000185246
PSMD5-AS1	Previous symbol	CUTALP	cutA divalent cation tolerance homolog-like, pseudogene	9q33.2	HGNC:27367	253039	ENSG00000226752
PTBP2	Approved symbol	PTBP2	polypyrimidine tract binding protein 2	1p21.3	HGNC:17662	58155	ENSG00000117569
PTPRD	Approved symbol	PTPRD	protein tyrosine phosphatase, receptor type D	9p24.1-p23	HGNC:9668	5789	ENSG00000153707
PUS7L	Approved symbol	PUS7L	pseudouridylate synthase 7 like	12q12	HGNC:25276	83448	ENSG00000129317
PVRIG	Approved symbol	PVRIG	PVR related immunoglobulin domain containing	7q22.1	HGNC:32190	79037	ENSG00000213413
PWP1	Approved symbol	PWP1	PWP1 homolog, endonuclein	12q23.3	HGNC:17015	11137	ENSG00000136045
PXK	Approved symbol	PXK	PX domain containing serine/threonine kinase like	3p14.3	HGNC:23326	54899	ENSG00000168297
PYROXD1	Approved symbol	PYROXD1	pyridine nucleotide-disulphide oxidoreductase domain 1	12p12.1	HGNC:26162	79912	ENSG00000121350
RAB3D	Approved symbol	RAB3D	RAB3D, member RAS oncogene family	19p13.2	HGNC:9779	9545	ENSG00000105514
RAD52	Approved symbol	RAD52	RAD52 homolog, DNA repair protein	12p13.33	HGNC:9824	5893	ENSG00000002016
RAD54L2	Approved symbol	RAD54L2	RAD54 like 2	3p21.2	HGNC:29123	23132	ENSG00000164080
RAPGEF6	Approved symbol	RAPGEF6	Rap guanine nucleotide exchange factor 6	5q31.1	HGNC:20655	51735	ENSG00000158987
RAPGEFL1	Approved symbol	RAPGEFL1	Rap guanine nucleotide exchange factor like 1	17q21.1	HGNC:17428	51195	ENSG00000108352
RASA2	Approved symbol	RASA2	RAS p21 protein activator 2	3q23	HGNC:9872	5922	ENSG00000155903
RBBP9	Approved symbol	RBBP9	RB binding protein 9, serine hydrolase	20p11.23	HGNC:9892	10741	ENSG00000089050
RBFOX2	Approved symbol	RBFOX2	RNA binding fox-1 homolog 2	22q12.3	HGNC:9906	23543	ENSG00000100320
RBM25	Approved symbol	RBM25	RNA binding motif protein 25	14q24.2	HGNC:23244	58517	ENSG00000119707
RBM26	Approved symbol	RBM26	RNA binding motif protein 26	13q31.1	HGNC:20327	64062	ENSG00000139746
RBM33	Approved symbol	RBM33	RNA binding motif protein 33	7q36.3	HGNC:27223	155435	ENSG00000184863
RBM4	Approved symbol	RBM4	RNA binding motif protein 4	11q13.2	HGNC:9901	5936	ENSG00000173933
RBM48	Approved symbol	RBM48	RNA binding motif protein 48	7q21.2	HGNC:21785	84060	ENSG00000127993
RBM5	Approved symbol	RBM5	RNA binding motif protein 5	3p21.31	HGNC:9902	10181	ENSG00000003756
RBM5-AS1	Approved symbol	RBM5-AS1	RBM5 antisense RNA 1	3p21.31	HGNC:48871	100775107	ENSG00000281691
RBM6	Approved symbol	RBM6	RNA binding motif protein 6	3p21.31	HGNC:9903	10180	ENSG00000004534
RBMS2	Approved symbol	RBMS2	RNA binding motif single stranded interacting protein 2	12q13.3	HGNC:9909	5939	ENSG00000076067
REEP1	Approved symbol	REEP1	receptor accessory protein 1	2p11.2	HGNC:25786	65055	ENSG00000068615
RFC5	Approved symbol	RFC5	replication factor C subunit 5	12q24.23	HGNC:9973	5985	ENSG00000111445
RFWD3	Approved symbol	RFWD3	ring finger and WD repeat domain 3	16q23.1	HGNC:25539	55159	ENSG00000168411
RFX3	Approved symbol	RFX3	regulatory factor X3	9p24.2	HGNC:9984	5991	ENSG00000080298
RIC3	Approved symbol	RIC3	RIC3 acetylcholine receptor chaperone	11p15.4	HGNC:30338	79608	ENSG00000166405
RMDN2	Approved symbol	RMDN2	regulator of microtubule dynamics 2	2p22.2	HGNC:26567	151393	ENSG00000115841
RNASEL	Approved symbol	RNASEL	ribonuclease L	1q25.3	HGNC:10050	6041	ENSG00000135828
RNF207	Approved symbol	RNF207	ring finger protein 207	1p36.31	HGNC:32947	388591	ENSG00000158286
RNF213	Approved symbol	RNF213	ring finger protein 213	17q25.3	HGNC:14539	57674	ENSG00000173821
RNF217	Approved symbol	RNF217	ring finger protein 217	6q22.31	HGNC:21487	154214	ENSG00000146373
RNF219	Approved symbol	RNF219	ring finger protein 219	13q31.1	HGNC:20308	79596	ENSG00000152193
RNPC3	Approved symbol	RNPC3	RNA binding region (RNP1, RRM) containing 3	1p21.1	HGNC:18666	55599	ENSG00000185946
ROCK1P1	Approved symbol	ROCK1P1	Rho associated coiled-coil containing protein kinase 1 pseudogene 1	18p11.32	HGNC:37832	727758	ENSG00000263006
RP11-242D8.1	Unmatched
RP11-342C23.4	Unmatched
RP11-384K6.6	Unmatched
RP11-395P17.3	Unmatched
RP11-473M20.14	Unmatched
RP11-890B15.2	Synonyms	LINC02551	long intergenic non-protein coding RNA 2551	11q24.3	HGNC:53586	100507431	ENSG00000254842
RP4-669L17.10	Unmatched
RP4-669L17.10-2	Unmatched
RP5-1159O4.2	Unmatched
RPA3	Approved symbol	RPA3	replication protein A3	7p21.3	HGNC:10291	6119	ENSG00000106399
RPL32P3	Approved symbol	RPL32P3	ribosomal protein L32 pseudogene 3	3q21.3	HGNC:27024	132241	ENSG00000251474
RRAGB	Approved symbol	RRAGB	Ras related GTP binding B	Xp11.21	HGNC:19901	10325	ENSG00000083750
RTTN	Approved symbol	RTTN	rotatin	18q22.1	HGNC:18654	25914	ENSG00000176225
RWDD2A	Approved symbol	RWDD2A	RWD domain containing 2A	6q14.1	HGNC:21385	112611	ENSG00000013392
RWDD3	Approved symbol	RWDD3	RWD domain containing 3	1p21.3	HGNC:21393	25950	ENSG00000122481
SAMD9L	Approved symbol	SAMD9L	sterile alpha motif domain containing 9 like	7q21.2	HGNC:1349	219285	ENSG00000177409
SAP30	Approved symbol	SAP30	Sin3A associated protein 30	4q34.1	HGNC:10532	8819	ENSG00000164105
SASH1	Approved symbol	SASH1	SAM and SH3 domain containing 1	6q24.3-q25.1	HGNC:19182	23328	ENSG00000111961
SAYSD1	Approved symbol	SAYSD1	SAYSVFN motif domain containing 1	6p21.2	HGNC:21025	55776	ENSG00000112167
SCAI	Approved symbol	SCAI	suppressor of cancer cell invasion	9q33.3	HGNC:26709	286205	ENSG00000173611
SEC16B	Approved symbol	SEC16B	SEC16 homolog B, endoplasmic reticulum export factor	1q25.2	HGNC:30301	89866	ENSG00000120341
SEC22A	Approved symbol	SEC22A	SEC22 homolog A, vesicle trafficking protein	3q21.1	HGNC:20260	26984	ENSG00000121542
SENP1	Approved symbol	SENP1	SUMO specific peptidase 1	12q13.11	HGNC:17927	29843	ENSG00000079387
SENP7	Approved symbol	SENP7	SUMO specific peptidase 7	3q12.3	HGNC:30402	57337	ENSG00000138468
SEPSECS	Approved symbol	SEPSECS	Sep (O-phosphoserine) tRNA:Sec (selenocysteine) tRNA synthase	4p15.2	HGNC:30605	51091	ENSG00000109618
SERINC4	Approved symbol	SERINC4	serine incorporator 4	15q15.3	HGNC:32237	619189	ENSG00000184716
SETD5	Approved symbol	SETD5	SET domain containing 5	3p25.3	HGNC:25566	55209	ENSG00000168137
SETMAR	Approved symbol	SETMAR	SET domain and mariner transposase fusion gene	3p26.1	HGNC:10762	6419	ENSG00000170364
SF3A3	Approved symbol	SF3A3	splicing factor 3a subunit 3	1p34.3	HGNC:10767	10946	ENSG00000183431
SFR1	Approved symbol	SFR1	SWI5 dependent homologous recombination repair protein 1	10q25.1	HGNC:29574	119392	ENSG00000156384
SFXN5	Approved symbol	SFXN5	sideroflexin 5	2p13.2	HGNC:16073	94097	ENSG00000144040
SGK494	Unmatched
SH2D1B	Approved symbol	SH2D1B	SH2 domain containing 1B	1q23.3	HGNC:30416	117157	ENSG00000198574
SH3BP5-AS1	Approved symbol	SH3BP5-AS1	SH3BP5 antisense RNA 1	3p25.1	HGNC:44501	100505696	ENSG00000224660
SH3YL1	Approved symbol	SH3YL1	SH3 and SYLF domain containing 1	2p25.3	HGNC:29546	26751	ENSG00000035115
SHPK	Approved symbol	SHPK	sedoheptulokinase	17p13.2	HGNC:1492	23729	ENSG00000197417
SLC10A7	Approved symbol	SLC10A7	solute carrier family 10 member 7	4q31.22	HGNC:23088	84068	ENSG00000120519
SLC18B1	Approved symbol	SLC18B1	solute carrier family 18 member B1	6q23.2	HGNC:21573	116843	ENSG00000146409
SLC25A17	Approved symbol	SLC25A17	solute carrier family 25 member 17	22q13.2	HGNC:10987	10478	ENSG00000100372
SLC25A28	Approved symbol	SLC25A28	solute carrier family 25 member 28	10q24.2	HGNC:23472	81894	ENSG00000155287
SLC25A29	Approved symbol	SLC25A29	solute carrier family 25 member 29	14q32.2	HGNC:20116	123096	ENSG00000197119
SLC25A36	Approved symbol	SLC25A36	solute carrier family 25 member 36	3q23	HGNC:25554	55186	ENSG00000114120
SLC25A45	Approved symbol	SLC25A45	solute carrier family 25 member 45	11q13.1	HGNC:27442	283130	ENSG00000162241
SLC30A7	Approved symbol	SLC30A7	solute carrier family 30 member 7	1p21.2	HGNC:19306	148867	ENSG00000162695
SLC35A1	Approved symbol	SLC35A1	solute carrier family 35 member A1	6q15	HGNC:11021	10559	ENSG00000164414
SLC35A5	Approved symbol	SLC35A5	solute carrier family 35 member A5	3q13.2	HGNC:20792	55032	ENSG00000138459
SLC35B3	Approved symbol	SLC35B3	solute carrier family 35 member B3	6p24.3	HGNC:21601	51000	ENSG00000124786
SLC4A5	Approved symbol	SLC4A5	solute carrier family 4 member 5	2p13.1	HGNC:18168	57835	ENSG00000188687
SLC8A1	Approved symbol	SLC8A1	solute carrier family 8 member A1	2p22.1	HGNC:11068	6546	ENSG00000183023
SMARCAD1	Approved symbol	SMARCAD1	SWI/SNF-related, matrix-associated actin-dependent regulator of chromatin, subfamily a, containing DEAD/H box 1	4q22.3	HGNC:18398	56916	ENSG00000163104
SMC6	Approved symbol	SMC6	structural maintenance of chromosomes 6	2p24.2	HGNC:20466	79677	ENSG00000163029
SMPD3	Approved symbol	SMPD3	sphingomyelin phosphodiesterase 3	16q22.1	HGNC:14240	55512	ENSG00000103056
SNRNP70	Approved symbol	SNRNP70	small nuclear ribonucleoprotein U1 subunit 70	19q13.33	HGNC:11150	6625	ENSG00000104852
SNX1	Approved symbol	SNX1	sorting nexin 1	15q22.31	HGNC:11172	6642	ENSG00000028528
SP1	Approved symbol	SP1	Sp1 transcription factor	12q13.13	HGNC:11205	6667	ENSG00000185591
SPDYE6	Approved symbol	SPDYE6	speedy/RINGO cell cycle regulator family member E6	7q22.1	HGNC:35465	729597	ENSG00000260097
SPIN2B	Approved symbol	SPIN2B	spindlin family member 2B	Xp11.21	HGNC:33147	474343	ENSG00000186787
SPIN3	Approved symbol	SPIN3	spindlin family member 3	Xp11.21	HGNC:27272	169981	ENSG00000204271
SPRY3	Approved symbol	SPRY3	sprouty RTK signaling antagonist 3	Xq28 and Yq12	HGNC:11271	10251	ENSG00000168939
SPSB2	Approved symbol	SPSB2	splA/ryanodine receptor domain and SOCS box containing 2	12p13.31	HGNC:29522	84727	ENSG00000111671
SREK1	Approved symbol	SREK1	splicing regulatory glutamic acid and lysine rich protein 1	5q12.3	HGNC:17882	140890	ENSG00000153914
SREK1IP1	Approved symbol	SREK1IP1	SREK1 interacting protein 1	5q12.3	HGNC:26716	285672	ENSG00000153006
SRRM1	Approved symbol	SRRM1	serine and arginine repetitive matrix 1	1p36.11	HGNC:16638	10250	ENSG00000133226
SRRM2	Approved symbol	SRRM2	serine/arginine repetitive matrix 2	16p13.3	HGNC:16639	23524	ENSG00000167978
SRSF11	Approved symbol	SRSF11	serine and arginine rich splicing factor 11	1p31.1	HGNC:10782	9295	ENSG00000116754
SSFA2	Approved symbol	SSFA2	sperm specific antigen 2	2q31.3	HGNC:11319	6744	ENSG00000138434
ST7L	Approved symbol	ST7L	suppression of tumorigenicity 7 like	1p13.2	HGNC:18441	54879	ENSG00000007341
STAG3	Approved symbol	STAG3	stromal antigen 3	7q22.1	HGNC:11356	10734	ENSG00000066923
STAG3L1	Approved symbol	STAG3L1	stromal antigen 3-like 1 (pseudogene)	7q11.23	HGNC:33852	54441	ENSG00000205583
STAG3L2	Approved symbol	STAG3L2	stromal antigen 3-like 2 (pseudogene)	7q11.23	HGNC:33886	442582	ENSG00000277072
STAG3L3	Approved symbol	STAG3L3	stromal antigen 3-like 3 (pseudogene)	7q11.23	HGNC:33845	442578	ENSG00000174353
STAG3L5P-PVRIG2P-PILRB	Approved symbol	STAG3L5P-PVRIG2P-PILRB	STAG3L5P-PVRIG2P-PILRB readthrough	7q22.1	HGNC:48898	101752399	ENSG00000272752
STARD9	Approved symbol	STARD9	StAR related lipid transfer domain containing 9	15q15.2	HGNC:19162	57519	ENSG00000159433
STAT2	Approved symbol	STAT2	signal transducer and activator of transcription 2	12q13.2	HGNC:11363	6773	ENSG00000170581
STIM2	Approved symbol	STIM2	stromal interaction molecule 2	4p15.2	HGNC:19205	57620	ENSG00000109689
STK35	Approved symbol	STK35	serine/threonine kinase 35	20p13	HGNC:16254	140901	ENSG00000125834
STK36	Approved symbol	STK36	serine/threonine kinase 36	2q35	HGNC:17209	27148	ENSG00000163482
STRBP	Approved symbol	STRBP	spermatid perinuclear RNA binding protein	9q33.1-q33.3	HGNC:16462	55342	ENSG00000165209
STX16	Approved symbol	STX16	syntaxin 16	20q13.32	HGNC:11431	8675	ENSG00000124222
SUDS3	Approved symbol	SUDS3	SDS3 homolog, SIN3A corepressor complex component	12q24.23	HGNC:29545	64426	ENSG00000111707
SUPT3H	Approved symbol	SUPT3H	SPT3 homolog, SAGA and STAGA complex component	6p21.1	HGNC:11466	8464	ENSG00000196284
SUPT7L	Approved symbol	SUPT7L	SPT7 like, STAGA complex gamma subunit	2p23.3	HGNC:30632	9913	ENSG00000119760
SUV420H1	Previous symbol	KMT5B	lysine methyltransferase 5B	11q13.2	HGNC:24283	51111	ENSG00000110066
SWT1	Approved symbol	SWT1	SWT1, RNA endoribonuclease homolog	1q25.3	HGNC:16785	54823	ENSG00000116668
SYTL3	Approved symbol	SYTL3	synaptotagmin like 3	6q25.3	HGNC:15587	94120	ENSG00000164674
TAF1	Approved symbol	TAF1	TATA-box binding protein associated factor 1	Xq13.1	HGNC:11535	6872	ENSG00000147133
TAF1L	Approved symbol	TAF1L	TATA-box binding protein associated factor 1 like	9p21.1	HGNC:18056	138474	ENSG00000122728
TANK	Approved symbol	TANK	TRAF family member associated NFKB activator	2q24.2	HGNC:11562	10010	ENSG00000136560
TAPBPL	Approved symbol	TAPBPL	TAP binding protein like	12p13.31	HGNC:30683	55080	ENSG00000139192
TARBP1	Approved symbol	TARBP1	TAR (HIV-1) RNA binding protein 1	1q42.2	HGNC:11568	6894	ENSG00000059588
TBCEL	Approved symbol	TBCEL	tubulin folding cofactor E like	11q23.3	HGNC:28115	219899	ENSG00000154114
TBL1XR1	Approved symbol	TBL1XR1	transducin beta like 1 X-linked receptor 1	3q26.32	HGNC:29529	79718	ENSG00000177565
TCHP	Approved symbol	TCHP	trichoplein keratin filament binding	12q24.11	HGNC:28135	84260	ENSG00000139437
TDP2	Approved symbol	TDP2	tyrosyl-DNA phosphodiesterase 2	6p22.3	HGNC:17768	51567	ENSG00000111802
TGDS	Approved symbol	TGDS	TDP-glucose 4,6-dehydratase	13q32.1	HGNC:20324	23483	ENSG00000088451
THOC1	Approved symbol	THOC1	THO complex 1	18p11.32	HGNC:19070	9984	ENSG00000079134
THOC2	Approved symbol	THOC2	THO complex 2	Xq25	HGNC:19073	57187	ENSG00000125676
THUMPD1	Approved symbol	THUMPD1	THUMP domain containing 1	16p12.3	HGNC:23807	55623	ENSG00000066654
TIA1	Approved symbol	TIA1	TIA1 cytotoxic granule associated RNA binding protein	2p13.3	HGNC:11802	7072	ENSG00000116001
TIGD1	Approved symbol	TIGD1	tigger transposable element derived 1	2q37.1	HGNC:14523	200765	ENSG00000221944
TMCO1	Approved symbol	TMCO1	transmembrane and coiled-coil domains 1	1q24.1	HGNC:18188	54499	ENSG00000143183
TMCO6	Approved symbol	TMCO6	transmembrane and coiled-coil domains 6	5q31.3	HGNC:28814	55374	ENSG00000113119
TMED8	Approved symbol	TMED8	transmembrane p24 trafficking protein family member 8	14q24.3	HGNC:18633	283578	ENSG00000100580
TMEM128	Approved symbol	TMEM128	transmembrane protein 128	4p16.3	HGNC:28201	85013	ENSG00000132406
TMEM135	Approved symbol	TMEM135	transmembrane protein 135	11q14.2	HGNC:26167	65084	ENSG00000166575
TMEM194A	Previous symbol	NEMP1	nuclear envelope integral membrane protein 1	12q13.3	HGNC:29001	23306	ENSG00000166881
TMEM198B	Approved symbol	TMEM198B	transmembrane protein 198B (pseudogene)	12q13.2	HGNC:43629	440104	ENSG00000182796
TMEM218	Approved symbol	TMEM218	transmembrane protein 218	11q24.2	HGNC:27344	219854	ENSG00000150433
TMEM220	Approved symbol	TMEM220	transmembrane protein 220	17p13.1	HGNC:33757	388335	ENSG00000187824
TMEM254	Approved symbol	TMEM254	transmembrane protein 254	10q22.3	HGNC:25804	80195	ENSG00000133678
TMEM260	Approved symbol	TMEM260	transmembrane protein 260	14q22.3	HGNC:20185	54916	ENSG00000070269
TMEM39A	Approved symbol	TMEM39A	transmembrane protein 39A	3q13.33	HGNC:25600	55254	ENSG00000176142
TMEM63A	Approved symbol	TMEM63A	transmembrane protein 63A	1q42.12	HGNC:29118	9725	ENSG00000196187
TMEM80	Approved symbol	TMEM80	transmembrane protein 80	11p15.5	HGNC:27453	283232	ENSG00000177042
TMTC3	Approved symbol	TMTC3	transmembrane and tetratricopeptide repeat containing 3	12q21.32	HGNC:26899	160418	ENSG00000139324
TNFRSF19	Approved symbol	TNFRSF19	TNF receptor superfamily member 19	13q12.12	HGNC:11915	55504	ENSG00000127863
TP53INP1	Approved symbol	TP53INP1	tumor protein p53 inducible nuclear protein 1	8q22.1	HGNC:18022	94241	ENSG00000164938
TP73-AS1	Approved symbol	TP73-AS1	TP73 antisense RNA 1	1p36.32	HGNC:29052	57212	ENSG00000227372
TPCN2	Approved symbol	TPCN2	two pore segment channel 2	11q13.3	HGNC:20820	219931	ENSG00000162341
TRAF3IP2-AS1	Approved symbol	TRAF3IP2-AS1	TRAF3IP2 antisense RNA 1	6q21	HGNC:40005	643749	ENSG00000231889
TRANK1	Approved symbol	TRANK1	tetratricopeptide repeat and ankyrin repeat containing 1	3p22.2	HGNC:29011	9881	ENSG00000168016
TRAPPC2	Approved symbol	TRAPPC2	trafficking protein particle complex 2	Xp22.2	HGNC:23068	6399	ENSG00000196459
TRIM13	Approved symbol	TRIM13	tripartite motif containing 13	13q14.2	HGNC:9976	10206	ENSG00000204977
TRIM33	Approved symbol	TRIM33	tripartite motif containing 33	1p13.2	HGNC:16290	51592	ENSG00000197323
TRIM52	Approved symbol	TRIM52	tripartite motif containing 52	5q35.3	HGNC:19024	84851	ENSG00000183718
TRIM66	Approved symbol	TRIM66	tripartite motif containing 66	11p15.4	HGNC:29005	9866	ENSG00000166436
TRMT10B	Approved symbol	TRMT10B	tRNA methyltransferase 10B	9p13.2	HGNC:26454	158234	ENSG00000165275
TRMT44	Approved symbol	TRMT44	tRNA methyltransferase 44 homolog	4p16.1	HGNC:26653	152992	ENSG00000155275
TRO	Approved symbol	TRO	trophinin	Xp11.21	HGNC:12326	7216	ENSG00000067445
TSEN2	Approved symbol	TSEN2	tRNA splicing endonuclease subunit 2	3p25.2	HGNC:28422	80746	ENSG00000154743
TTC14	Approved symbol	TTC14	tetratricopeptide repeat domain 14	3q26.33	HGNC:24697	151613	ENSG00000163728
TTC17	Approved symbol	TTC17	tetratricopeptide repeat domain 17	11p12-p11.2	HGNC:25596	55761	ENSG00000052841
TTC23	Approved symbol	TTC23	tetratricopeptide repeat domain 23	15q26.3	HGNC:25730	64927	ENSG00000103852
TTC31	Approved symbol	TTC31	tetratricopeptide repeat domain 31	2p13.1	HGNC:25759	64427	ENSG00000115282
TUBD1	Approved symbol	TUBD1	tubulin delta 1	17q23.1	HGNC:16811	51174	ENSG00000108423
TUBE1	Approved symbol	TUBE1	tubulin epsilon 1	6q21	HGNC:20775	51175	ENSG00000074935
TUG1	Approved symbol	TUG1	taurine up-regulated 1 (non-protein coding)	22q12.2	HGNC:26066	55000	ENSG00000253352
TXLNG2P	Previous symbol	TXLNGY	taxilin gamma pseudogene, Y-linked	Yq11.222-q11.223	HGNC:18473	246126	ENSG00000131002
U2AF1L4	Approved symbol	U2AF1L4	U2 small nuclear RNA auxiliary factor 1 like 4	19q13.13	HGNC:23020	199746	ENSG00000161265
UBXN7	Approved symbol	UBXN7	UBX domain protein 7	3q29	HGNC:29119	26043	ENSG00000163960
UFL1	Approved symbol	UFL1	UFM1 specific ligase 1	6q16.1	HGNC:23039	23376	ENSG00000014123
UNC119B	Approved symbol	UNC119B	unc-119 lipid binding chaperone B	12q24.31	HGNC:16488	84747	ENSG00000175970
UNC13B	Approved symbol	UNC13B	unc-13 homolog B	9p13.3	HGNC:12566	10497	ENSG00000198722
UPF3A	Approved symbol	UPF3A	UPF3A, regulator of nonsense mediated mRNA decay	13q34	HGNC:20332	65110	ENSG00000169062
USP3	Approved symbol	USP3	ubiquitin specific peptidase 3	15q22.3	HGNC:12626	9960	ENSG00000140455
USP32P1	Approved symbol	USP32P1	ubiquitin specific peptidase 32 pseudogene 1	17p11.2	HGNC:43570	162632	ENSG00000188933
USP32P2	Approved symbol	USP32P2	ubiquitin specific peptidase 32 pseudogene 2	17p11.2	HGNC:30751	220594	ENSG00000233327
USP37	Approved symbol	USP37	ubiquitin specific peptidase 37	2q35	HGNC:20063	57695	ENSG00000135913
USP40	Approved symbol	USP40	ubiquitin specific peptidase 40	2q37.1	HGNC:20069	55230	ENSG00000085982
USP48	Approved symbol	USP48	ubiquitin specific peptidase 48	1p36.12	HGNC:18533	84196	ENSG00000090686
USP49	Approved symbol	USP49	ubiquitin specific peptidase 49	6p21.1	HGNC:20078	25862	ENSG00000164663
USP6	Approved symbol	USP6	ubiquitin specific peptidase 6	17p13.2	HGNC:12629	9098	ENSG00000129204
USP9Y	Approved symbol	USP9Y	ubiquitin specific peptidase 9, Y-linked	Yq11.221	HGNC:12633	8287	ENSG00000114374
UTY	Approved symbol	UTY	ubiquitously transcribed tetratricopeptide repeat containing, Y-linked	Yq11.221	HGNC:12638	7404	ENSG00000183878
VAMP1	Approved symbol	VAMP1	vesicle associated membrane protein 1	12p13.31	HGNC:12642	6843	ENSG00000139190
VCPKMT	Approved symbol	VCPKMT	valosin containing protein lysine methyltransferase	14q21.3	HGNC:20352	79609	ENSG00000100483
VPS36	Approved symbol	VPS36	vacuolar protein sorting 36 homolog	13q14.3	HGNC:20312	51028	ENSG00000136100
VPS45	Approved symbol	VPS45	vacuolar protein sorting 45 homolog	1q21.2	HGNC:14579	11311	ENSG00000136631
VPS4B	Approved symbol	VPS4B	vacuolar protein sorting 4 homolog B	18q21.33	HGNC:10895	9525	ENSG00000119541
VPS54	Approved symbol	VPS54	VPS54, GARP complex subunit	2p15-p14	HGNC:18652	51542	ENSG00000143952
WDR11	Approved symbol	WDR11	WD repeat domain 11	10q26.12	HGNC:13831	55717	ENSG00000120008
WDR27	Approved symbol	WDR27	WD repeat domain 27	6q27	HGNC:21248	253769	ENSG00000184465
WDR48	Approved symbol	WDR48	WD repeat domain 48	3p22.2	HGNC:30914	57599	ENSG00000114742
WDR52	Previous symbol	CFAP44	cilia and flagella associated protein 44	3q13.2	HGNC:25631	55779	ENSG00000206530
WDR59	Approved symbol	WDR59	WD repeat domain 59	16q23.1	HGNC:25706	79726	ENSG00000103091
WDR83	Approved symbol	WDR83	WD repeat domain 83	19p13.13	HGNC:32672	84292	ENSG00000123154
WDR89	Approved symbol	WDR89	WD repeat domain 89	14q23.2	HGNC:20489	112840	ENSG00000140006
WDR91	Approved symbol	WDR91	WD repeat domain 91	7q33	HGNC:24997	29062	ENSG00000105875
WHAMMP2	Approved symbol	WHAMMP2	WAS protein homolog associated with actin, golgi membranes and microtubules pseudogene 2	15q13.1	HGNC:32360	440253	ENSG00000248334
WHAMMP3	Approved symbol	WHAMMP3	WAS protein homolog associated with actin, golgi membranes and microtubules pseudogene 3	15q11.2	HGNC:27892	339005	ENSG00000276141
WSB1	Approved symbol	WSB1	WD repeat and SOCS box containing 1	17q11.1	HGNC:19221	26118	ENSG00000109046
XRCC3	Approved symbol	XRCC3	X-ray repair cross complementing 3	14q32.3	HGNC:12830	7517	ENSG00000126215
ZBTB1	Approved symbol	ZBTB1	zinc finger and BTB domain containing 1	14q23.3	HGNC:20259	22890	ENSG00000126804
ZBTB11	Approved symbol	ZBTB11	zinc finger and BTB domain containing 11	3q12.3	HGNC:16740	27107	ENSG00000066422
ZBTB25	Approved symbol	ZBTB25	zinc finger and BTB domain containing 25	14q23.3	HGNC:13112	7597	ENSG00000089775
ZBTB33	Approved symbol	ZBTB33	zinc finger and BTB domain containing 33	Xq24	HGNC:16682	10009	ENSG00000177485
ZC2HC1A	Approved symbol	ZC2HC1A	zinc finger C2HC-type containing 1A	8q21.13	HGNC:24277	51101	ENSG00000104427
ZC3H11A	Approved symbol	ZC3H11A	zinc finger CCCH-type containing 11A	1q32.1	HGNC:29093	9877	ENSG00000058673
ZC3H14	Approved symbol	ZC3H14	zinc finger CCCH-type containing 14	14q31.3	HGNC:20509	79882	ENSG00000100722
ZC3H7A	Approved symbol	ZC3H7A	zinc finger CCCH-type containing 7A	16p13.13	HGNC:30959	29066	ENSG00000122299
ZDHHC21	Approved symbol	ZDHHC21	zinc finger DHHC-type containing 21	9p22.3	HGNC:20750	340481	ENSG00000175893
ZFP14	Approved symbol	ZFP14	ZFP14 zinc finger protein	19q13.13	HGNC:29312	57677	ENSG00000142065
ZFP28	Approved symbol	ZFP28	ZFP28 zinc finger protein	19q13.43	HGNC:17801	140612	ENSG00000196867
ZFP3	Approved symbol	ZFP3	ZFP3 zinc finger protein	17p13.2	HGNC:12861	124961	ENSG00000180787
ZFYVE16	Approved symbol	ZFYVE16	zinc finger FYVE-type containing 16	5q14.1	HGNC:20756	9765	ENSG00000039319
ZFYVE27	Approved symbol	ZFYVE27	zinc finger FYVE-type containing 27	10q24.2	HGNC:26559	118813	ENSG00000155256
ZKSCAN7	Approved symbol	ZKSCAN7	zinc finger with KRAB and SCAN domains 7	3p21.31	HGNC:12955	55888	ENSG00000196345
ZKSCAN8	Approved symbol	ZKSCAN8	zinc finger with KRAB and SCAN domains 8	6p21	HGNC:12983	7745	ENSG00000198315
ZMAT1	Approved symbol	ZMAT1	zinc finger matrin-type 1	Xq22.1	HGNC:29377	84460	ENSG00000166432
ZMYM1	Approved symbol	ZMYM1	zinc finger MYM-type containing 1	1p34.3	HGNC:26253	79830	ENSG00000197056
ZNF10	Approved symbol	ZNF10	zinc finger protein 10	12q24.33	HGNC:12879	7556	ENSG00000256223
ZNF100	Approved symbol	ZNF100	zinc finger protein 100	19p13.1	HGNC:12880	163227	ENSG00000197020
ZNF107	Approved symbol	ZNF107	zinc finger protein 107	7q11.21	HGNC:12887	51427	ENSG00000196247
ZNF112	Approved symbol	ZNF112	zinc finger protein 112	19q13.31	HGNC:12892	7771	ENSG00000062370
ZNF140	Approved symbol	ZNF140	zinc finger protein 140	12q24.33	HGNC:12925	7699	ENSG00000196387
ZNF155	Approved symbol	ZNF155	zinc finger protein 155	19q13.31	HGNC:12940	7711	ENSG00000204920
ZNF160	Approved symbol	ZNF160	zinc finger protein 160	19q13.42	HGNC:12948	90338	ENSG00000170949
ZNF175	Approved symbol	ZNF175	zinc finger protein 175	19q13.41	HGNC:12964	7728	ENSG00000105497
ZNF195	Approved symbol	ZNF195	zinc finger protein 195	11p15.5	HGNC:12986	7748	ENSG00000005801
ZNF211	Approved symbol	ZNF211	zinc finger protein 211	19q13.4	HGNC:13003	10520	ENSG00000121417
ZNF224	Approved symbol	ZNF224	zinc finger protein 224	19q13.2	HGNC:13017	7767	ENSG00000267680
ZNF226	Approved symbol	ZNF226	zinc finger protein 226	19q13.31	HGNC:13019	7769	ENSG00000167380
ZNF234	Approved symbol	ZNF234	zinc finger protein 234	19q13	HGNC:13027	10780	ENSG00000263002
ZNF235	Approved symbol	ZNF235	zinc finger protein 235	19q13.2	HGNC:12866	9310	ENSG00000159917
ZNF24	Approved symbol	ZNF24	zinc finger protein 24	18q12.2	HGNC:13032	7572	ENSG00000172466
ZNF248	Approved symbol	ZNF248	zinc finger protein 248	10p11.21	HGNC:13041	57209	ENSG00000198105
ZNF251	Approved symbol	ZNF251	zinc finger protein 251	8q24.3	HGNC:13045	90987	ENSG00000198169
ZNF264	Approved symbol	ZNF264	zinc finger protein 264	19q13.43	HGNC:13057	9422	ENSG00000083844
ZNF267	Approved symbol	ZNF267	zinc finger protein 267	16p11.2	HGNC:13060	10308	ENSG00000185947
ZNF268	Approved symbol	ZNF268	zinc finger protein 268	12q24.33	HGNC:13061	10795	ENSG00000090612
ZNF280D	Approved symbol	ZNF280D	zinc finger protein 280D	15q21.2	HGNC:25953	54816	ENSG00000137871
ZNF286A	Approved symbol	ZNF286A	zinc finger protein 286A	17p12	HGNC:13501	57335	ENSG00000187607
ZNF3	Approved symbol	ZNF3	zinc finger protein 3	7q22.1	HGNC:13089	7551	ENSG00000166526
ZNF320	Approved symbol	ZNF320	zinc finger protein 320	19q13.41	HGNC:13842	162967	ENSG00000182986
ZNF331	Approved symbol	ZNF331	zinc finger protein 331	19q13	HGNC:15489	55422	ENSG00000130844
ZNF333	Approved symbol	ZNF333	zinc finger protein 333	19p13.12	HGNC:15624	84449	ENSG00000160961
ZNF337	Approved symbol	ZNF337	zinc finger protein 337	20p11.21	HGNC:15809	26152	ENSG00000130684
ZNF37A	Approved symbol	ZNF37A	zinc finger protein 37A	10p11.1	HGNC:13102	7587	ENSG00000075407
ZNF37BP	Approved symbol	ZNF37BP	zinc finger protein 37B, pseudogene	10q11.21	HGNC:13103	100129482	ENSG00000234420
ZNF397	Approved symbol	ZNF397	zinc finger protein 397	18q12.2	HGNC:18818	84307	ENSG00000186812
ZNF417	Approved symbol	ZNF417	zinc finger protein 417	19q13.43	HGNC:20646	147687	ENSG00000173480
ZNF440	Approved symbol	ZNF440	zinc finger protein 440	19p13.2	HGNC:20874	126070	ENSG00000171295
ZNF441	Approved symbol	ZNF441	zinc finger protein 441	19p13.2	HGNC:20875	126068	ENSG00000197044
ZNF449	Approved symbol	ZNF449	zinc finger protein 449	Xq26.3	HGNC:21039	203523	ENSG00000173275
ZNF451	Approved symbol	ZNF451	zinc finger protein 451	6p12.1	HGNC:21091	26036	ENSG00000112200
ZNF461	Approved symbol	ZNF461	zinc finger protein 461	19q13.13	HGNC:21629	92283	ENSG00000197808
ZNF471	Approved symbol	ZNF471	zinc finger protein 471	19q13.43	HGNC:23226	57573	ENSG00000196263
ZNF484	Approved symbol	ZNF484	zinc finger protein 484	9q22.31	HGNC:23385	83744	ENSG00000127081
ZNF493	Approved symbol	ZNF493	zinc finger protein 493	19p12	HGNC:23708	284443	ENSG00000196268
ZNF512	Approved symbol	ZNF512	zinc finger protein 512	2p23.3	HGNC:29380	84450	ENSG00000243943
ZNF514	Approved symbol	ZNF514	zinc finger protein 514	2q11.1	HGNC:25894	84874	ENSG00000144026
ZNF518A	Approved symbol	ZNF518A	zinc finger protein 518A	10q24.1	HGNC:29009	9849	ENSG00000177853
ZNF544	Approved symbol	ZNF544	zinc finger protein 544	19q13.43	HGNC:16759	27300	ENSG00000198131
ZNF546	Approved symbol	ZNF546	zinc finger protein 546	19q13.2	HGNC:28671	339327	ENSG00000187187
ZNF552	Approved symbol	ZNF552	zinc finger protein 552	19q13.43	HGNC:26135	79818	ENSG00000178935
ZNF564	Approved symbol	ZNF564	zinc finger protein 564	19p13.2	HGNC:31106	163050	ENSG00000249709
ZNF565	Approved symbol	ZNF565	zinc finger protein 565	19q13.12	HGNC:26726	147929	ENSG00000196357
ZNF567	Approved symbol	ZNF567	zinc finger protein 567	19q13.12	HGNC:28696	163081	ENSG00000189042
ZNF589	Approved symbol	ZNF589	zinc finger protein 589	3p21.31	HGNC:16747	51385	ENSG00000164048
ZNF605	Approved symbol	ZNF605	zinc finger protein 605	12q24.33	HGNC:28068	100289635	ENSG00000196458
ZNF638	Approved symbol	ZNF638	zinc finger protein 638	2p13.3-p13.2	HGNC:17894	27332	ENSG00000075292
ZNF654	Approved symbol	ZNF654	zinc finger protein 654	3p11.1	HGNC:25612	55279	ENSG00000175105
ZNF662	Approved symbol	ZNF662	zinc finger protein 662	3p22.1	HGNC:31930	389114	ENSG00000182983
ZNF692	Approved symbol	ZNF692	zinc finger protein 692	1q44	HGNC:26049	55657	ENSG00000171163
ZNF7	Approved symbol	ZNF7	zinc finger protein 7	8q24.3	HGNC:13139	7553	ENSG00000147789
ZNF700	Approved symbol	ZNF700	zinc finger protein 700	19p13.2	HGNC:25292	90592	ENSG00000196757
ZNF714	Approved symbol	ZNF714	zinc finger protein 714	19p12	HGNC:27124	148206	ENSG00000160352
ZNF720	Approved symbol	ZNF720	zinc finger protein 720	16p11.2	HGNC:26987	124411	ENSG00000197302
ZNF721	Approved symbol	ZNF721	zinc finger protein 721	4p16.3	HGNC:29425	170960	ENSG00000182903
ZNF765	Approved symbol	ZNF765	zinc finger protein 765	19q13.41	HGNC:25092	91661	ENSG00000196417
ZNF767	Previous symbol	ZNF767P	zinc finger family member 767, pseudogene	7q36.1	HGNC:21884	79970	ENSG00000133624
ZNF780A	Approved symbol	ZNF780A	zinc finger protein 780A	19q13.2	HGNC:27603	284323	ENSG00000197782
ZNF780B	Approved symbol	ZNF780B	zinc finger protein 780B	19q13.2	HGNC:33109	163131	ENSG00000128000
ZNF785	Approved symbol	ZNF785	zinc finger protein 785	16p11.2	HGNC:26496	146540	ENSG00000197162
ZNF791	Approved symbol	ZNF791	zinc finger protein 791	19p13.13	HGNC:26895	163049	ENSG00000173875
ZNF793	Approved symbol	ZNF793	zinc finger protein 793	19q13.12	HGNC:33115	390927	ENSG00000188227
ZNF81	Approved symbol	ZNF81	zinc finger protein 81	Xp11.23	HGNC:13156	347344	ENSG00000197779
ZNF83	Approved symbol	ZNF83	zinc finger protein 83	19q13.41	HGNC:13158	55769	ENSG00000167766
ZNF84	Approved symbol	ZNF84	zinc finger protein 84	12q24.33	HGNC:13159	7637	ENSG00000198040
ZNF841	Approved symbol	ZNF841	zinc finger protein 841	19q13.41	HGNC:27611	284371	ENSG00000197608
ZNF879	Approved symbol	ZNF879	zinc finger protein 879	5q35.3	HGNC:37273	345462	ENSG00000234284
ZNF92	Approved symbol	ZNF92	zinc finger protein 92	7q11.21	HGNC:13168	168374	ENSG00000146757
ZSCAN25	Approved symbol	ZSCAN25	zinc finger and SCAN domain containing 25	7q22.1	HGNC:21961	221785	ENSG00000197037
ZSCAN30	Approved symbol	ZSCAN30	zinc finger and SCAN domain containing 30	18q12.2	HGNC:33517	100101467	ENSG00000186814
ZSCAN9	Approved symbol	ZSCAN9	zinc finger and SCAN domain containing 9	6p22.1	HGNC:12984	7746	ENSG00000137185

## Sheet: M5
HGNC gene symbol	Gene symbol annotation status	Corresponding approved gene symbol	Corresponding approved name	Location	Associated HGNC ID	Associated Entrez ID	Associated Ensembl ID
ADAM23	Approved symbol	ADAM23	ADAM metallopeptidase domain 23	2q33.3	HGNC:202	8745	ENSG00000114948
ANKS1B	Approved symbol	ANKS1B	ankyrin repeat and sterile alpha motif domain containing 1B	12q23.1	HGNC:24600	56899	ENSG00000185046
ARID1B	Approved symbol	ARID1B	AT-rich interaction domain 1B	6q25.3	HGNC:18040	57492	ENSG00000049618
ARNT2	Approved symbol	ARNT2	aryl hydrocarbon receptor nuclear translocator 2	15q25.1	HGNC:16876	9915	ENSG00000172379
ATRNL1	Approved symbol	ATRNL1	attractin like 1	10q25.3	HGNC:29063	26033	ENSG00000107518
CALCOCO1	Approved symbol	CALCOCO1	calcium binding and coiled-coil domain 1	12q13.13	HGNC:29306	57658	ENSG00000012822
CALM1	Approved symbol	CALM1	calmodulin 1	14q32.11	HGNC:1442	801	ENSG00000198668
CAP2	Approved symbol	CAP2	cyclase associated actin cytoskeleton regulatory protein 2	6p22.3	HGNC:20039	10486	ENSG00000112186
CAPN3	Approved symbol	CAPN3	calpain 3	15q15.1	HGNC:1480	825	ENSG00000092529
CHAF1B	Approved symbol	CHAF1B	chromatin assembly factor 1 subunit B	21q22.12-q22.13	HGNC:1911	8208	ENSG00000159259
CIB2	Approved symbol	CIB2	calcium and integrin binding family member 2	15q25.1	HGNC:24579	10518	ENSG00000136425
CMYA5	Approved symbol	CMYA5	cardiomyopathy associated 5	5q14.1	HGNC:14305	202333	ENSG00000164309
CTNNA3	Approved symbol	CTNNA3	catenin alpha 3	10q21.3	HGNC:2511	29119	ENSG00000183230
CUL3	Approved symbol	CUL3	cullin 3	2q36.2	HGNC:2553	8452	ENSG00000036257
DHFR	Approved symbol	DHFR	dihydrofolate reductase	5q14.1	HGNC:2861	1719	ENSG00000228716
DHX40	Approved symbol	DHX40	DEAH-box helicase 40	17q23.1	HGNC:18018	79665	ENSG00000108406
DIRC2	Approved symbol	DIRC2	disrupted in renal carcinoma 2	3q21.1	HGNC:16628	84925	ENSG00000138463
GREM2	Approved symbol	GREM2	gremlin 2, DAN family BMP antagonist	1q43	HGNC:17655	64388	ENSG00000180875
HECTD1	Approved symbol	HECTD1	HECT domain E3 ubiquitin protein ligase 1	14q12	HGNC:20157	25831	ENSG00000092148
HEXIM1	Approved symbol	HEXIM1	hexamethylene bisacetamide inducible 1	17q21.31	HGNC:24953	10614	ENSG00000186834
IDE	Approved symbol	IDE	insulin degrading enzyme	10q23.33	HGNC:5381	3416	ENSG00000119912
JPH1	Approved symbol	JPH1	junctophilin 1	8q21.11	HGNC:14201	56704	ENSG00000104369
LINC00657	Previous symbol	NORAD	non-coding RNA activated by DNA damage	20q11.23	HGNC:44311	647979	ENSG00000260032
LOC100287072	Unmatched
LOC101060212	Unmatched
LRRC30	Approved symbol	LRRC30	leucine rich repeat containing 30	18p11.23	HGNC:30219	339291	ENSG00000206422
MBTPS2	Approved symbol	MBTPS2	membrane bound transcription factor peptidase, site 2	Xp22.12	HGNC:15455	51360	ENSG00000012174
MED14	Approved symbol	MED14	mediator complex subunit 14	Xp11.4	HGNC:2370	9282	ENSG00000180182
MEF2A	Approved symbol	MEF2A	myocyte enhancer factor 2A	15q26.3	HGNC:6993	4205	ENSG00000068305
MITF	Approved symbol	MITF	melanogenesis associated transcription factor	3p13	HGNC:7105	4286	ENSG00000187098
MLXIP	Approved symbol	MLXIP	MLX interacting protein	12q21.31	HGNC:17055	22877	ENSG00000175727
MTDH	Approved symbol	MTDH	metadherin	8q22.1	HGNC:29608	92140	ENSG00000147649
MYBPC2	Approved symbol	MYBPC2	myosin binding protein C, fast type	19q13.33	HGNC:7550	4606	ENSG00000086967
MYH1	Approved symbol	MYH1	myosin heavy chain 1	17p13.1	HGNC:7567	4619	ENSG00000109061
MYH13	Approved symbol	MYH13	myosin heavy chain 13	17p13.1	HGNC:7571	8735	ENSG00000006788
MYH3	Approved symbol	MYH3	myosin heavy chain 3	17p13.1	HGNC:7573	4621	ENSG00000109063
MYH4	Approved symbol	MYH4	myosin heavy chain 4	17p13.1	HGNC:7574	4622	ENSG00000264424
MYH8	Approved symbol	MYH8	myosin heavy chain 8	17p13.1	HGNC:7578	4626	ENSG00000133020
MYOM2	Approved symbol	MYOM2	myomesin 2	8p23.3	HGNC:7614	9172	ENSG00000036448
NBAS	Approved symbol	NBAS	neuroblastoma amplified sequence	2p24.3	HGNC:15625	51594	ENSG00000151779
NCK2	Approved symbol	NCK2	NCK adaptor protein 2	2q12.2	HGNC:7665	8440	ENSG00000071051
NDFIP1	Approved symbol	NDFIP1	Nedd4 family interacting protein 1	5q31.3	HGNC:17592	80762	ENSG00000131507
PATL1	Approved symbol	PATL1	PAT1 homolog 1, processing body mRNA decay factor	11q12.1	HGNC:26721	219988	ENSG00000166889
PKDCC	Approved symbol	PKDCC	protein kinase domain containing, cytoplasmic	2p21	HGNC:25123	91461	ENSG00000162878
PWAR5	Approved symbol	PWAR5	Prader Willi/Angelman region RNA 5	15q11.2	HGNC:30090	8123	ENSG00000279192
RDX	Approved symbol	RDX	radixin	11q23	HGNC:9944	5962	ENSG00000137710
SEC24B	Approved symbol	SEC24B	SEC24 homolog B, COPII coat complex component	4q25	HGNC:10704	10427	ENSG00000138802
STAT5B	Approved symbol	STAT5B	signal transducer and activator of transcription 5B	17q21.2	HGNC:11367	6777	ENSG00000173757
TMED10	Approved symbol	TMED10	transmembrane p24 trafficking protein 10	14q24.3	HGNC:16998	10972	ENSG00000170348
TMOD1	Approved symbol	TMOD1	tropomodulin 1	9q22.33	HGNC:11871	7111	ENSG00000136842
TOB1	Approved symbol	TOB1	transducer of ERBB2, 1	17q21.33	HGNC:11979	10140	ENSG00000141232
TOM1L2	Approved symbol	TOM1L2	target of myb1 like 2 membrane trafficking protein	17p11.2	HGNC:11984	146691	ENSG00000175662
TRIP12	Approved symbol	TRIP12	thyroid hormone receptor interactor 12	2q36.3	HGNC:12306	9320	ENSG00000153827
USP14	Approved symbol	USP14	ubiquitin specific peptidase 14	18p11.32	HGNC:12612	9097	ENSG00000101557
USP24	Approved symbol	USP24	ubiquitin specific peptidase 24	1p32.3	HGNC:12623	23358	ENSG00000162402
USP9X	Approved symbol	USP9X	ubiquitin specific peptidase 9, X-linked	Xp11.4	HGNC:12632	8239	ENSG00000124486
WNT4	Approved symbol	WNT4	Wnt family member 4	1p36.12	HGNC:12783	54361	ENSG00000162552
ZBED6	Approved symbol	ZBED6	zinc finger BED-type containing 6	1q32.1	HGNC:33273	100381270	ENSG00000257315
ZC3H12C	Approved symbol	ZC3H12C	zinc finger CCCH-type containing 12C	11q22.3	HGNC:29362	85463	ENSG00000149289
ZFYVE9	Approved symbol	ZFYVE9	zinc finger FYVE-type containing 9	1p32.3	HGNC:6775	9372	ENSG00000157077
ZRANB1	Approved symbol	ZRANB1	zinc finger RANBP2-type containing 1	10q26.13	HGNC:18224	54764	ENSG00000019995

## Sheet: M6
HGNC gene symbol	Gene symbol annotation status	Corresponding approved gene symbol	Corresponding approved name	Location	Associated HGNC ID	Associated Entrez ID	Associated Ensembl ID
ARF5	Approved symbol	ARF5	ADP ribosylation factor 5	7q32.1	HGNC:658	381	ENSG00000004059
ARL2	Approved symbol	ARL2	ADP ribosylation factor like GTPase 2	11q13.1	HGNC:693	402	ENSG00000213465
C12orf44	Previous symbol	ATG101	autophagy related 101	12q13.13	HGNC:25679	60673	ENSG00000123395
CDK2AP1	Approved symbol	CDK2AP1	cyclin dependent kinase 2 associated protein 1	12q24.31	HGNC:14002	8099	ENSG00000111328
CLTB	Approved symbol	CLTB	clathrin light chain B	5q35.2	HGNC:2091	1212	ENSG00000175416
COPZ2	Approved symbol	COPZ2	coatomer protein complex subunit zeta 2	17q21.32	HGNC:19356	51226	ENSG00000005243
GTF3A	Approved symbol	GTF3A	general transcription factor IIIA	13q12.2	HGNC:4662	2971	ENSG00000122034
GUK1	Approved symbol	GUK1	guanylate kinase 1	1q42.13	HGNC:4693	2987	ENSG00000143774
HSD17B10	Approved symbol	HSD17B10	hydroxysteroid 17-beta dehydrogenase 10	Xp11.22	HGNC:4800	3028	ENSG00000072506
LRRC23	Approved symbol	LRRC23	leucine rich repeat containing 23	12p13.31	HGNC:19138	10233	ENSG00000010626
LSM4	Approved symbol	LSM4	LSM4 homolog, U6 small nuclear RNA and mRNA degradation associated	19p13.1	HGNC:17259	25804	ENSG00000130520
MIEN1	Approved symbol	MIEN1	migration and invasion enhancer 1	17q12	HGNC:28230	84299	ENSG00000141741
NUTF2	Approved symbol	NUTF2	nuclear transport factor 2	16q22.1	HGNC:13722	10204	ENSG00000102898
PARD6A	Approved symbol	PARD6A	par-6 family cell polarity regulator alpha	16q22.1	HGNC:15943	50855	ENSG00000102981
PIPSL	Approved symbol	PIPSL	PIP5K1A and PSMD4-like, pseudogene	10q23.33	HGNC:23733	266971	ENSG00000180764
PRDX1	Approved symbol	PRDX1	peroxiredoxin 1	1p34.1	HGNC:9352	5052	ENSG00000117450
PSMA7	Approved symbol	PSMA7	proteasome subunit alpha 7	20q13.33	HGNC:9536	5688	ENSG00000101182
PSMB3	Approved symbol	PSMB3	proteasome subunit beta 3	17q12	HGNC:9540	5691	ENSG00000277791
PSMB6	Approved symbol	PSMB6	proteasome subunit beta 6	17p13.2	HGNC:9543	5694	ENSG00000142507
PSMB7	Approved symbol	PSMB7	proteasome subunit beta 7	9q33.3	HGNC:9544	5695	ENSG00000136930
PSMC1	Approved symbol	PSMC1	proteasome 26S subunit, ATPase 1	14q32.11	HGNC:9547	5700	ENSG00000100764
PSMC3	Approved symbol	PSMC3	proteasome 26S subunit, ATPase 3	11p11.2	HGNC:9549	5702	ENSG00000165916
PSMD14	Approved symbol	PSMD14	proteasome 26S subunit, non-ATPase 14	2q24.2	HGNC:16889	10213	ENSG00000115233
PSMD4	Approved symbol	PSMD4	proteasome 26S subunit, non-ATPase 4	1q21.3	HGNC:9561	5710	ENSG00000159352
PSMD7	Approved symbol	PSMD7	proteasome 26S subunit, non-ATPase 7	16q23.1	HGNC:9565	5713	ENSG00000103035
SLC35B1	Approved symbol	SLC35B1	solute carrier family 35 member B1	17q21.33	HGNC:20798	10237	ENSG00000121073
TMEM160	Approved symbol	TMEM160	transmembrane protein 160	19q13.32	HGNC:26042	54958	ENSG00000130748
TTL	Approved symbol	TTL	tubulin tyrosine ligase	2q14.1	HGNC:21586	150465	ENSG00000114999
ZNHIT1	Approved symbol	ZNHIT1	zinc finger HIT-type containing 1	7q22.1	HGNC:21688	10467	ENSG00000106400

## Sheet: M7
HGNC gene symbol	Gene symbol annotation status	Corresponding approved gene symbol	Corresponding approved name	Location	Associated HGNC ID	Associated Entrez ID	Associated Ensembl ID
AGAP2	Approved symbol	AGAP2	ArfGAP with GTPase domain, ankyrin repeat and PH domain 2	12q14.1	HGNC:16921	116986	ENSG00000135439
BCL6B	Approved symbol	BCL6B	B cell CLL/lymphoma 6B	17p13.1	HGNC:1002	255877	ENSG00000161940
BST2	Approved symbol	BST2	bone marrow stromal cell antigen 2	19p13.11	HGNC:1119	684	ENSG00000130303
C1QTNF9	Approved symbol	C1QTNF9	C1q and TNF related 9	13q12.12	HGNC:28732	338872	ENSG00000240654
CA4	Approved symbol	CA4	carbonic anhydrase 4	17q23.1	HGNC:1375	762	ENSG00000167434
CD36	Approved symbol	CD36	CD36 molecule	7q21.11	HGNC:1663	948	ENSG00000135218
FUT1	Approved symbol	FUT1	fucosyltransferase 1 (H blood group)	19q13.33	HGNC:4012	2523	ENSG00000174951
GPIHBP1	Approved symbol	GPIHBP1	glycosylphosphatidylinositol anchored high density lipoprotein binding protein 1	8q24.3	HGNC:24945	338328	ENSG00000277494
ICAM2	Approved symbol	ICAM2	intercellular adhesion molecule 2	17q23.3	HGNC:5345	3384	ENSG00000108622
ISG15	Approved symbol	ISG15	ISG15 ubiquitin-like modifier	1p36.33	HGNC:4053	9636	ENSG00000187608
ISOC1	Approved symbol	ISOC1	isochorismatase domain containing 1	5q23.3	HGNC:24254	51015	ENSG00000066583
ITGA6	Approved symbol	ITGA6	integrin subunit alpha 6	2q31.1	HGNC:6142	3655	ENSG00000091409
KANK3	Approved symbol	KANK3	KN motif and ankyrin repeat domains 3	19p13.2	HGNC:24796	256949	ENSG00000186994
KLF2	Approved symbol	KLF2	Kruppel like factor 2	19p13.11	HGNC:6347	10365	ENSG00000127528
PCDH12	Approved symbol	PCDH12	protocadherin 12	5q31.3	HGNC:8657	51294	ENSG00000113555
PKD1L1	Approved symbol	PKD1L1	polycystin 1 like 1, transient receptor potential channel interacting	7p12.3	HGNC:18053	168507	ENSG00000158683
RASIP1	Approved symbol	RASIP1	Ras interacting protein 1	19q13.33	HGNC:24716	54922	ENSG00000105538
REEP2	Approved symbol	REEP2	receptor accessory protein 2	5q31.2	HGNC:17975	51308	ENSG00000132563
SH2D3C	Approved symbol	SH2D3C	SH2 domain containing 3C	9q34.11	HGNC:16884	10044	ENSG00000095370
SLC25A40	Approved symbol	SLC25A40	solute carrier family 25 member 40	7q21.12	HGNC:29680	55972	ENSG00000075303
SLC9A3R2	Approved symbol	SLC9A3R2	SLC9A3 regulator 2	16p13.3	HGNC:11076	9351	ENSG00000065054
TCF15	Approved symbol	TCF15	transcription factor 15	20p13	HGNC:11627	6939	ENSG00000125878
TEAD2	Approved symbol	TEAD2	TEA domain transcription factor 2	19q13.3	HGNC:11715	8463	ENSG00000074219
TMEM88	Approved symbol	TMEM88	transmembrane protein 88	17p13.1	HGNC:32371	92162	ENSG00000167874
VPS37B	Approved symbol	VPS37B	VPS37B, ESCRT-I subunit	12q24.31	HGNC:25754	79720	ENSG00000139722
ZNF254	Approved symbol	ZNF254	zinc finger protein 254	19p13	HGNC:13047	9534	ENSG00000213096
ZNF415	Approved symbol	ZNF415	zinc finger protein 415	19q13.42	HGNC:20636	55786	ENSG00000170954

## Sheet: M8
HGNC gene symbol	Gene symbol annotation status	Corresponding approved gene symbol	Corresponding approved name	Location	Associated HGNC ID	Associated Entrez ID	Associated Ensembl ID
AAED1	Approved symbol	AAED1	AhpC/TSA antioxidant enzyme domain containing 1	9q22.33	HGNC:16881	195827	ENSG00000158122
ABHD4	Approved symbol	ABHD4	abhydrolase domain containing 4	14q11.2	HGNC:20154	63874	ENSG00000100439
ABL2	Approved symbol	ABL2	ABL proto-oncogene 2, non-receptor tyrosine kinase	1q25.2	HGNC:77	27	ENSG00000143322
ACSL3	Approved symbol	ACSL3	acyl-CoA synthetase long chain family member 3	2q36.1	HGNC:3570	2181	ENSG00000123983
ACTR3B	Approved symbol	ACTR3B	ARP3 actin related protein 3 homolog B	7q36.1-q36.2	HGNC:17256	57180	ENSG00000133627
ADAMTSL5	Approved symbol	ADAMTSL5	ADAMTS like 5	19p13.3	HGNC:27912	339366	ENSG00000185761
AGO2	Approved symbol	AGO2	argonaute 2, RISC catalytic component	8q24.3	HGNC:3263	27161	ENSG00000123908
AKIRIN1	Approved symbol	AKIRIN1	akirin 1	1p34.3	HGNC:25744	79647	ENSG00000174574
ALPK3	Approved symbol	ALPK3	alpha kinase 3	15q25.3	HGNC:17574	57538	ENSG00000136383
ANKRD17	Approved symbol	ANKRD17	ankyrin repeat domain 17	4q13.3	HGNC:23575	26057	ENSG00000132466
ANKRD28	Approved symbol	ANKRD28	ankyrin repeat domain 28	3p25.1	HGNC:29024	23243	ENSG00000206560
ARHGAP17	Approved symbol	ARHGAP17	Rho GTPase activating protein 17	16p12.1	HGNC:18239	55114	ENSG00000140750
ARHGAP23	Approved symbol	ARHGAP23	Rho GTPase activating protein 23	17q12	HGNC:29293	57636	ENSG00000275832
ARHGAP26	Approved symbol	ARHGAP26	Rho GTPase activating protein 26	5q31.3	HGNC:17073	23092	ENSG00000145819
ARHGEF12	Approved symbol	ARHGEF12	Rho guanine nucleotide exchange factor 12	11q23.3	HGNC:14193	23365	ENSG00000196914
ARMCX1	Approved symbol	ARMCX1	armadillo repeat containing, X-linked 1	Xq22.1	HGNC:18073	51309	ENSG00000126947
ARVCF	Approved symbol	ARVCF	ARVCF, delta catenin family member	22q11.21	HGNC:728	421	ENSG00000099889
ATP2B1	Approved symbol	ATP2B1	ATPase plasma membrane Ca2+ transporting 1	12q21.33	HGNC:814	490	ENSG00000070961
AUTS2	Approved symbol	AUTS2	AUTS2, activator of transcription and developmental regulator	7q11.22	HGNC:14262	26053	ENSG00000158321
BACH2	Approved symbol	BACH2	BTB domain and CNC homolog 2	6q15	HGNC:14078	60468	ENSG00000112182
BCAR1	Approved symbol	BCAR1	BCAR1, Cas family scaffold protein	16q23.1	HGNC:971	9564	ENSG00000050820
BDP1	Approved symbol	BDP1	B double prime 1, subunit of RNA polymerase III transcription initiation factor IIIB	5q13.2	HGNC:13652	55814	ENSG00000145734
BMPR1A	Approved symbol	BMPR1A	bone morphogenetic protein receptor type 1A	10q23.2	HGNC:1076	657	ENSG00000107779
C17orf51	Approved symbol	C17orf51	chromosome 17 open reading frame 51	17p11.2	HGNC:27904	339263	ENSG00000212719
C19orf44	Approved symbol	C19orf44	chromosome 19 open reading frame 44	19p13.11	HGNC:26141	84167	ENSG00000105072
CASKIN2	Approved symbol	CASKIN2	CASK interacting protein 2	17q25.1	HGNC:18200	57513	ENSG00000177303
CD97	Previous symbol	ADGRE5	adhesion G protein-coupled receptor E5	19p13.12	HGNC:1711	976	ENSG00000123146
CDC42EP3	Approved symbol	CDC42EP3	CDC42 effector protein 3	2p22.2	HGNC:16943	10602	ENSG00000163171
CDCA7	Approved symbol	CDCA7	cell division cycle associated 7	2q31.1	HGNC:14628	83879	ENSG00000144354
CDK12	Approved symbol	CDK12	cyclin dependent kinase 12	17q12	HGNC:24224	51755	ENSG00000167258
CDKN1A	Approved symbol	CDKN1A	cyclin dependent kinase inhibitor 1A	6p21.2	HGNC:1784	1026	ENSG00000124762
CERK	Approved symbol	CERK	ceramide kinase	22q13.31	HGNC:19256	64781	ENSG00000100422
CERS6	Approved symbol	CERS6	ceramide synthase 6	2q24.3	HGNC:23826	253782	ENSG00000172292
CHD7	Approved symbol	CHD7	chromodomain helicase DNA binding protein 7	8q12.2	HGNC:20626	55636	ENSG00000171316
CHST3	Approved symbol	CHST3	carbohydrate sulfotransferase 3	10q22.1	HGNC:1971	9469	ENSG00000122863
CIRH1A	Previous symbol	UTP4	UTP4, small subunit processome component	16q22.1	HGNC:1983	84916	ENSG00000141076
CITED2	Approved symbol	CITED2	Cbp/p300 interacting transactivator with Glu/Asp rich carboxy-terminal domain 2	6q24.1	HGNC:1987	10370	ENSG00000164442
CLIP1	Approved symbol	CLIP1	CAP-Gly domain containing linker protein 1	12q24.31	HGNC:10461	6249	ENSG00000130779
CNKSR2	Approved symbol	CNKSR2	connector enhancer of kinase suppressor of Ras 2	Xp22.12	HGNC:19701	22866	ENSG00000149970
CPED1	Approved symbol	CPED1	cadherin like and PC-esterase domain containing 1	7q31.31	HGNC:26159	79974	ENSG00000106034
CRIM1	Approved symbol	CRIM1	cysteine rich transmembrane BMP regulator 1	2p22.2	HGNC:2359	51232	ENSG00000150938
CSPG4	Approved symbol	CSPG4	chondroitin sulfate proteoglycan 4	15q24.2	HGNC:2466	1464	ENSG00000173546
DAPK3	Approved symbol	DAPK3	death associated protein kinase 3	19p13.3	HGNC:2676	1613	ENSG00000167657
DDX28	Approved symbol	DDX28	DEAD-box helicase 28	16q22.1	HGNC:17330	55794	ENSG00000182810
DIDO1	Approved symbol	DIDO1	death inducer-obliterator 1	20q13.33	HGNC:2680	11083	ENSG00000101191
DLG5	Approved symbol	DLG5	discs large MAGUK scaffold protein 5	10q22.3	HGNC:2904	9231	ENSG00000151208
DOK7	Approved symbol	DOK7	docking protein 7	4p16.3	HGNC:26594	285489	ENSG00000175920
DUSP16	Approved symbol	DUSP16	dual specificity phosphatase 16	12p13.2	HGNC:17909	80824	ENSG00000111266
DUSP8	Approved symbol	DUSP8	dual specificity phosphatase 8	11p15.5	HGNC:3074	1850	ENSG00000184545
DYRK1A	Approved symbol	DYRK1A	dual specificity tyrosine phosphorylation regulated kinase 1A	21q22.13	HGNC:3091	1859	ENSG00000157540
EIF2AK4	Approved symbol	EIF2AK4	eukaryotic translation initiation factor 2 alpha kinase 4	15q15.1	HGNC:19687	440275	ENSG00000128829
EIF2B4	Approved symbol	EIF2B4	eukaryotic translation initiation factor 2B subunit delta	2p23.3	HGNC:3260	8890	ENSG00000115211
EMR2	Previous symbol	ADGRE2	adhesion G protein-coupled receptor E2	19p13.12	HGNC:3337	30817	ENSG00000127507
ENOX1	Approved symbol	ENOX1	ecto-NOX disulfide-thiol exchanger 1	13q14.11	HGNC:25474	55068	ENSG00000120658
ERAP1	Approved symbol	ERAP1	endoplasmic reticulum aminopeptidase 1	5q15	HGNC:18173	51752	ENSG00000164307
ESCO1	Approved symbol	ESCO1	establishment of sister chromatid cohesion N-acetyltransferase 1	18q11.2	HGNC:24645	114799	ENSG00000141446
ESYT1	Approved symbol	ESYT1	extended synaptotagmin 1	12q13.2	HGNC:29534	23344	ENSG00000139641
ESYT2	Approved symbol	ESYT2	extended synaptotagmin 2	7q36.3	HGNC:22211	57488	ENSG00000117868
ETV5	Approved symbol	ETV5	ETS variant 5	3q27.2	HGNC:3494	2119	ENSG00000244405
EXOC6B	Approved symbol	EXOC6B	exocyst complex component 6B	2p13.2	HGNC:17085	23233	ENSG00000144036
EZR	Approved symbol	EZR	ezrin	6q25.3	HGNC:12691	7430	ENSG00000092820
FAM20C	Approved symbol	FAM20C	FAM20C, golgi associated secretory pathway kinase	7p22.3	HGNC:22140	56975	ENSG00000177706
FAM219A	Approved symbol	FAM219A	family with sequence similarity 219 member A	9p13.3	HGNC:19920	203259	ENSG00000164970
FAM219B	Approved symbol	FAM219B	family with sequence similarity 219 member B	15q24.1-q24.2	HGNC:24695	57184	ENSG00000178761
FGF6	Approved symbol	FGF6	fibroblast growth factor 6	12p13.32	HGNC:3684	2251	ENSG00000111241
FLNC	Approved symbol	FLNC	filamin C	7q32.1	HGNC:3756	2318	ENSG00000128591
FOXO1	Approved symbol	FOXO1	forkhead box O1	13q14.11	HGNC:3819	2308	ENSG00000150907
FUS	Approved symbol	FUS	FUS RNA binding protein	16p11.2	HGNC:4010	2521	ENSG00000089280
FZD8	Approved symbol	FZD8	frizzled class receptor 8	10p11.21	HGNC:4046	8325	ENSG00000177283
GRWD1	Approved symbol	GRWD1	glutamate rich WD repeat containing 1	19q13.33	HGNC:21270	83743	ENSG00000105447
HARS	Approved symbol	HARS	histidyl-tRNA synthetase	5q31.3	HGNC:4816	3035	ENSG00000170445
HECA	Approved symbol	HECA	hdc homolog, cell cycle regulator	6q24.1	HGNC:21041	51696	ENSG00000112406
HNRNPA1P33	Approved symbol	HNRNPA1P33	heterogeneous nuclear ribonucleoprotein A1 pseudogene 33	10q11.22	HGNC:44990	728643	ENSG00000213412
HNRNPK	Approved symbol	HNRNPK	heterogeneous nuclear ribonucleoprotein K	9q21.32	HGNC:5044	3190	ENSG00000165119
HNRNPM	Approved symbol	HNRNPM	heterogeneous nuclear ribonucleoprotein M	19p13.2	HGNC:5046	4670	ENSG00000099783
HNRNPU	Approved symbol	HNRNPU	heterogeneous nuclear ribonucleoprotein U	1q44	HGNC:5048	3192	ENSG00000153187
HPCAL4	Approved symbol	HPCAL4	hippocalcin like 4	1p34.2	HGNC:18212	51440	ENSG00000116983
HPRT1	Approved symbol	HPRT1	hypoxanthine phosphoribosyltransferase 1	Xq26.2-q26.3	HGNC:5157	3251	ENSG00000165704
IPPK	Approved symbol	IPPK	inositol-pentakisphosphate 2-kinase	9q22.31	HGNC:14645	64768	ENSG00000127080
ITSN2	Approved symbol	ITSN2	intersectin 2	2p23.3	HGNC:6184	50618	ENSG00000198399
JOSD1	Approved symbol	JOSD1	Josephin domain containing 1	22q13.1	HGNC:28953	9929	ENSG00000100221
KCNN3	Approved symbol	KCNN3	potassium calcium-activated channel subfamily N member 3	1q21.3	HGNC:6292	3782	ENSG00000143603
KCNQ4	Approved symbol	KCNQ4	potassium voltage-gated channel subfamily Q member 4	1p34.2	HGNC:6298	9132	ENSG00000117013
KCTD20	Approved symbol	KCTD20	potassium channel tetramerization domain containing 20	6p21.31	HGNC:21052	222658	ENSG00000112078
KLHL25	Approved symbol	KLHL25	kelch like family member 25	15q25.3	HGNC:25732	64410	ENSG00000183655
KLHL29	Approved symbol	KLHL29	kelch like family member 29	2p24.1	HGNC:29404	114818	ENSG00000119771
KLHL34	Approved symbol	KLHL34	kelch like family member 34	Xp22.12	HGNC:26634	257240	ENSG00000185915
KMT2E	Approved symbol	KMT2E	lysine methyltransferase 2E	7q22.3	HGNC:18541	55904	ENSG00000005483
LARP4B	Approved symbol	LARP4B	La ribonucleoprotein domain family member 4B	10p15.3	HGNC:28987	23185	ENSG00000107929
LARS	Approved symbol	LARS	leucyl-tRNA synthetase	5q32	HGNC:6512	51520	ENSG00000133706
LITAF	Approved symbol	LITAF	lipopolysaccharide induced TNF factor	16p13.13	HGNC:16841	9516	ENSG00000189067
LNPEP	Approved symbol	LNPEP	leucyl and cystinyl aminopeptidase	5q15	HGNC:6656	4012	ENSG00000113441
LOC100128531	Unmatched
LOC102723773	Unmatched
LOC646214	Unmatched
LOC730268	Unmatched
LRP4	Approved symbol	LRP4	LDL receptor related protein 4	11p11.2	HGNC:6696	4038	ENSG00000134569
MAP10	Approved symbol	MAP10	microtubule associated protein 10	1q42.2	HGNC:29265	54627	ENSG00000212916
MAP3K14	Approved symbol	MAP3K14	mitogen-activated protein kinase kinase kinase 14	17q21.31	HGNC:6853	9020	ENSG00000006062
MAP3K7CL	Approved symbol	MAP3K7CL	MAP3K7 C-terminal like	21q21.3	HGNC:16457	56911	ENSG00000156265
MAP3K9	Approved symbol	MAP3K9	mitogen-activated protein kinase kinase kinase 9	14q24.2	HGNC:6861	4293	ENSG00000006432
MAP7D3	Approved symbol	MAP7D3	MAP7 domain containing 3	Xq26.3	HGNC:25742	79649	ENSG00000129680
MAPK1IP1L	Approved symbol	MAPK1IP1L	mitogen-activated protein kinase 1 interacting protein 1 like	14q22.3	HGNC:19840	93487	ENSG00000168175
MBP	Approved symbol	MBP	myelin basic protein	18q23	HGNC:6925	4155	ENSG00000197971
MED9	Approved symbol	MED9	mediator complex subunit 9	17p11.2	HGNC:25487	55090	ENSG00000141026
METTL7A	Approved symbol	METTL7A	methyltransferase like 7A	12q13.12	HGNC:24550	25840	ENSG00000185432
MFHAS1	Approved symbol	MFHAS1	malignant fibrous histiocytoma amplified sequence 1	8p23.1	HGNC:16982	9258	ENSG00000147324
MGA	Approved symbol	MGA	MGA, MAX dimerization protein	15q15	HGNC:14010	23269	ENSG00000174197
MIEF1	Approved symbol	MIEF1	mitochondrial elongation factor 1	22q13.1	HGNC:25979	54471	ENSG00000100335
MNT	Approved symbol	MNT	MAX network transcriptional repressor	17p13.3	HGNC:7188	4335	ENSG00000070444
MYBPH	Approved symbol	MYBPH	myosin binding protein H	1q32.1	HGNC:7552	4608	ENSG00000133055
NANS	Approved symbol	NANS	N-acetylneuraminate synthase	9q22.33	HGNC:19237	54187	ENSG00000095380
NEXN	Approved symbol	NEXN	nexilin F-actin binding protein	1p31.1	HGNC:29557	91624	ENSG00000162614
NOB1	Approved symbol	NOB1	NIN1 (RPN12) binding protein 1 homolog	16q22.1	HGNC:29540	28987	ENSG00000141101
NOL10	Approved symbol	NOL10	nucleolar protein 10	2p25.1	HGNC:25862	79954	ENSG00000115761
NOP2	Approved symbol	NOP2	NOP2 nucleolar protein	12p13.31	HGNC:7867	4839	ENSG00000111641
NOP56	Approved symbol	NOP56	NOP56 ribonucleoprotein	20p13	HGNC:15911	10528	ENSG00000101361
NRG2	Approved symbol	NRG2	neuregulin 2	5q31.2	HGNC:7998	9542	ENSG00000158458
NUP153	Approved symbol	NUP153	nucleoporin 153	6p22.3	HGNC:8062	9972	ENSG00000124789
P2RX5	Approved symbol	P2RX5	purinergic receptor P2X 5	17p13.2	HGNC:8536	5026	ENSG00000083454
P2RY2	Approved symbol	P2RY2	purinergic receptor P2Y2	11q13.4	HGNC:8541	5029	ENSG00000175591
PABPN1	Approved symbol	PABPN1	poly(A) binding protein nuclear 1	14q11.2	HGNC:8565	8106	ENSG00000100836
PALMD	Approved symbol	PALMD	palmdelphin	1p21.2	HGNC:15846	54873	ENSG00000099260
PCNT	Approved symbol	PCNT	pericentrin	21q22.3	HGNC:16068	5116	ENSG00000160299
PDCD11	Approved symbol	PDCD11	programmed cell death 11	10q24.33	HGNC:13408	22984	ENSG00000148843
PDLIM3	Approved symbol	PDLIM3	PDZ and LIM domain 3	4q35.1	HGNC:20767	27295	ENSG00000154553
PDXK	Approved symbol	PDXK	pyridoxal kinase	21q22.3	HGNC:8819	8566	ENSG00000160209
PHC2	Approved symbol	PHC2	polyhomeotic homolog 2	1p35.1	HGNC:3183	1912	ENSG00000134686
PHF1	Approved symbol	PHF1	PHD finger protein 1	6p21.32	HGNC:8919	5252	ENSG00000112511
PI4K2A	Approved symbol	PI4K2A	phosphatidylinositol 4-kinase type 2 alpha	10q24.2	HGNC:30031	55361	ENSG00000155252
PIGW	Approved symbol	PIGW	phosphatidylinositol glycan anchor biosynthesis class W	17q12	HGNC:23213	284098	ENSG00000277161
PIK3CB	Approved symbol	PIK3CB	phosphatidylinositol-4,5-bisphosphate 3-kinase catalytic subunit beta	3q22.3	HGNC:8976	5291	ENSG00000051382
PLA2G15	Approved symbol	PLA2G15	phospholipase A2 group XV	16q22.1	HGNC:17163	23659	ENSG00000103066
POLDIP3	Approved symbol	POLDIP3	DNA polymerase delta interacting protein 3	22q13.2	HGNC:23782	84271	ENSG00000100227
POTEM	Approved symbol	POTEM	POTE ankyrin domain family member M	14q11.2	HGNC:37096	641455	ENSG00000222036
PPAP2A	Previous symbol	PLPP1	phospholipid phosphatase 1	5q11.2	HGNC:9228	8611	ENSG00000067113
PPARD	Approved symbol	PPARD	peroxisome proliferator activated receptor delta	6p21.31	HGNC:9235	5467	ENSG00000112033
PPP1R3C	Approved symbol	PPP1R3C	protein phosphatase 1 regulatory subunit 3C	10q23.32	HGNC:9293	5507	ENSG00000119938
PPP2R1B	Approved symbol	PPP2R1B	protein phosphatase 2 scaffold subunit Abeta	11q23.1	HGNC:9303	5519	ENSG00000137713
PQLC2	Approved symbol	PQLC2	PQ loop repeat containing 2	1p36.13	HGNC:26001	54896	ENSG00000040487
PRKAR1A	Approved symbol	PRKAR1A	protein kinase cAMP-dependent type I regulatory subunit alpha	17q24.2	HGNC:9388	5573	ENSG00000108946
PRPF4	Approved symbol	PRPF4	pre-mRNA processing factor 4	9q32	HGNC:17349	9128	ENSG00000136875
PTPN3	Approved symbol	PTPN3	protein tyrosine phosphatase, non-receptor type 3	9q31	HGNC:9655	5774	ENSG00000070159
PXN	Approved symbol	PXN	paxillin	12q24.23	HGNC:9718	5829	ENSG00000089159
QSOX2	Approved symbol	QSOX2	quiescin sulfhydryl oxidase 2	9q34.3	HGNC:30249	169714	ENSG00000165661
RAB35	Approved symbol	RAB35	RAB35, member RAS oncogene family	12q24.23	HGNC:9774	11021	ENSG00000111737
RBM10	Approved symbol	RBM10	RNA binding motif protein 10	Xp11.3	HGNC:9896	8241	ENSG00000182872
RBM14	Approved symbol	RBM14	RNA binding motif protein 14	11q13.2	HGNC:14219	10432	ENSG00000239306
RBM8A	Approved symbol	RBM8A	RNA binding motif protein 8A	1q21.1	HGNC:9905	9939	ENSG00000265241
RNF6	Approved symbol	RNF6	ring finger protein 6	13q12.13	HGNC:10069	6049	ENSG00000127870
RP11-450K4.1	Unmatched
RPN2	Approved symbol	RPN2	ribophorin II	20q11.23	HGNC:10382	6185	ENSG00000118705
RRP12	Approved symbol	RRP12	ribosomal RNA processing 12 homolog	10q24.1	HGNC:29100	23223	ENSG00000052749
SAMD4A	Approved symbol	SAMD4A	sterile alpha motif domain containing 4A	14q22.2	HGNC:23023	23034	ENSG00000020577
SCAPER	Approved symbol	SCAPER	S-phase cyclin A associated protein in the ER	15q24.3	HGNC:13081	49855	ENSG00000140386
SCFD2	Approved symbol	SCFD2	sec1 family domain containing 2	4q12	HGNC:30676	152579	ENSG00000184178
SEC31A	Approved symbol	SEC31A	SEC31 homolog A, COPII coat complex component	4q21.22	HGNC:17052	22872	ENSG00000138674
SGK223	Synonyms	PRAG1	PEAK1 related, kinase-activating pseudokinase 1	8p23.1	HGNC:25438	157285	ENSG00000275342
SH3BP5	Approved symbol	SH3BP5	SH3 domain binding protein 5	3p25.1	HGNC:10827	9467	ENSG00000131370
SIK2	Approved symbol	SIK2	salt inducible kinase 2	11q23.1	HGNC:21680	23235	ENSG00000170145
SIPA1L3	Approved symbol	SIPA1L3	signal induced proliferation associated 1 like 3	19q13.13-q13.2	HGNC:23801	23094	ENSG00000105738
SLC15A4	Approved symbol	SLC15A4	solute carrier family 15 member 4	12q24.33	HGNC:23090	121260	ENSG00000139370
SLC36A1	Approved symbol	SLC36A1	solute carrier family 36 member 1	5q33.1	HGNC:18761	206358	ENSG00000123643
SLC38A7	Approved symbol	SLC38A7	solute carrier family 38 member 7	16q21	HGNC:25582	55238	ENSG00000103042
SLC9A1	Approved symbol	SLC9A1	solute carrier family 9 member A1	1p36.11	HGNC:11071	6548	ENSG00000090020
SLCO5A1	Approved symbol	SLCO5A1	solute carrier organic anion transporter family member 5A1	8q13.3	HGNC:19046	81796	ENSG00000137571
SMARCA5	Approved symbol	SMARCA5	SWI/SNF related, matrix associated, actin dependent regulator of chromatin, subfamily a, member 5	4q31.21	HGNC:11101	8467	ENSG00000153147
SMEK1	Previous symbol	PPP4R3A	protein phosphatase 4 regulatory subunit 3A	14q32.12	HGNC:20219	55671	ENSG00000100796
SNX9	Approved symbol	SNX9	sorting nexin 9	6q25.3	HGNC:14973	51429	ENSG00000130340
SOCS7	Approved symbol	SOCS7	suppressor of cytokine signaling 7	17q12	HGNC:29846	30837	ENSG00000274211
SORT1	Approved symbol	SORT1	sortilin 1	1p13.3	HGNC:11186	6272	ENSG00000134243
SPEN	Approved symbol	SPEN	spen family transcriptional repressor	1p36.21-p36.13	HGNC:17575	23013	ENSG00000065526
SPIRE1	Approved symbol	SPIRE1	spire type actin nucleation factor 1	18p11.21	HGNC:30622	56907	ENSG00000134278
SSH1	Approved symbol	SSH1	slingshot protein phosphatase 1	12q24.11	HGNC:30579	54434	ENSG00000084112
SUGP2	Approved symbol	SUGP2	SURP and G-patch domain containing 2	19p13	HGNC:18641	10147	ENSG00000064607
TANGO2	Approved symbol	TANGO2	transport and golgi organization 2 homolog	22q11.21	HGNC:25439	128989	ENSG00000183597
TBC1D22B	Approved symbol	TBC1D22B	TBC1 domain family member 22B	6p21.2	HGNC:21602	55633	ENSG00000065491
TERF2IP	Approved symbol	TERF2IP	TERF2 interacting protein	16q23.1	HGNC:19246	54386	ENSG00000166848
TIGD5	Approved symbol	TIGD5	tigger transposable element derived 5	8q24.3	HGNC:18336	84948	ENSG00000179886
TLE4	Approved symbol	TLE4	transducin like enhancer of split 4	9q21.31	HGNC:11840	7091	ENSG00000106829
TNFAIP3	Approved symbol	TNFAIP3	TNF alpha induced protein 3	6q23.3	HGNC:11896	7128	ENSG00000118503
TNFRSF1B	Approved symbol	TNFRSF1B	TNF receptor superfamily member 1B	1p36.22	HGNC:11917	7133	ENSG00000028137
TRIM27	Approved symbol	TRIM27	tripartite motif containing 27	6p22.1	HGNC:9975	5987	ENSG00000204713
TTC28	Approved symbol	TTC28	tetratricopeptide repeat domain 28	22q12.1	HGNC:29179	23331	ENSG00000100154
TUBB4B	Approved symbol	TUBB4B	tubulin beta 4B class IVb	9q34.3	HGNC:20771	10383	ENSG00000188229
TXNDC11	Approved symbol	TXNDC11	thioredoxin domain containing 11	16p13.13	HGNC:28030	51061	ENSG00000153066
UBP1	Approved symbol	UBP1	upstream binding protein 1	3p22.3	HGNC:12507	7342	ENSG00000153560
UBR5	Approved symbol	UBR5	ubiquitin protein ligase E3 component n-recognin 5	8q22.3	HGNC:16806	51366	ENSG00000104517
URB2	Approved symbol	URB2	URB2 ribosome biogenesis 2 homolog (S. cerevisiae)	1q42.13	HGNC:28967	9816	ENSG00000135763
URGCP	Approved symbol	URGCP	upregulator of cell proliferation	7p13	HGNC:30890	55665	ENSG00000106608
USP36	Approved symbol	USP36	ubiquitin specific peptidase 36	17q25.3	HGNC:20062	57602	ENSG00000055483
WWOX	Approved symbol	WWOX	WW domain containing oxidoreductase	16q23.1-q23.2	HGNC:12799	51741	ENSG00000186153
XIAP	Approved symbol	XIAP	X-linked inhibitor of apoptosis	Xq25	HGNC:592	331	ENSG00000101966
XPO5	Approved symbol	XPO5	exportin 5	6p21.1	HGNC:17675	57510	ENSG00000124571
XRCC6P5	Approved symbol	XRCC6P5	X-ray repair cross complementing 6 pseudogene 5	Xq22.1	HGNC:45187	442459	ENSG00000215070
XRN2	Approved symbol	XRN2	5'-3' exoribonuclease 2	20p11.22	HGNC:12836	22803	ENSG00000088930
ZBTB2	Approved symbol	ZBTB2	zinc finger and BTB domain containing 2	6q25.1	HGNC:20868	57621	ENSG00000181472
ZMIZ1	Approved symbol	ZMIZ1	zinc finger MIZ-type containing 1	10q22.3	HGNC:16493	57178	ENSG00000108175
ZNF131	Approved symbol	ZNF131	zinc finger protein 131	5p12	HGNC:12915	7690	ENSG00000172262
ZNF263	Approved symbol	ZNF263	zinc finger protein 263	16p13.3	HGNC:13056	10127	ENSG00000006194
ZNF275	Approved symbol	ZNF275	zinc finger protein 275	Xq28	HGNC:13069	10838	ENSG00000063587
ZNF317	Approved symbol	ZNF317	zinc finger protein 317	19p13	HGNC:13507	57693	ENSG00000130803
ZNF367	Approved symbol	ZNF367	zinc finger protein 367	9q22.32	HGNC:18320	195828	ENSG00000165244
ZNF408	Approved symbol	ZNF408	zinc finger protein 408	11p11.2	HGNC:20041	79797	ENSG00000175213
ZNF462	Approved symbol	ZNF462	zinc finger protein 462	9q31.2	HGNC:21684	58499	ENSG00000148143
ZNF473	Approved symbol	ZNF473	zinc finger protein 473	19q13.33	HGNC:23239	25888	ENSG00000142528
ZNF697	Approved symbol	ZNF697	zinc finger protein 697	1p12	HGNC:32034	90874	ENSG00000143067
ZNF764	Approved symbol	ZNF764	zinc finger protein 764	16p11.2	HGNC:28200	92595	ENSG00000169951
ZNF778	Approved symbol	ZNF778	zinc finger protein 778	16q24.3	HGNC:26479	197320	ENSG00000170100
ZNRF3	Approved symbol	ZNRF3	zinc and ring finger 3	22q12.1	HGNC:18126	84133	ENSG00000183579
ZXDC	Approved symbol	ZXDC	ZXD family zinc finger C	3q21.3	HGNC:28160	79364	ENSG00000070476

## Sheet: M9
HGNC gene symbol	Gene symbol annotation status	Corresponding approved gene symbol	Corresponding approved name	Location	Associated HGNC ID	Associated Entrez ID	Associated Ensembl ID
AAMDC	Approved symbol	AAMDC	adipogenesis associated Mth938 domain containing	11q14.1	HGNC:30205	28971	ENSG00000087884
ABCC6	Approved symbol	ABCC6	ATP binding cassette subfamily C member 6	16p13.11	HGNC:57	368	ENSG00000091262
ABHD1	Approved symbol	ABHD1	abhydrolase domain containing 1	2p23.3	HGNC:17553	84696	ENSG00000143994
ABHD14A	Approved symbol	ABHD14A	abhydrolase domain containing 14A	3p21.2	HGNC:24538	25864	ENSG00000248487
ACAD9	Approved symbol	ACAD9	acyl-CoA dehydrogenase family member 9	3q21.3	HGNC:21497	28976	ENSG00000177646
ACADM	Approved symbol	ACADM	acyl-CoA dehydrogenase medium chain	1p31.1	HGNC:89	34	ENSG00000117054
ACAP1	Approved symbol	ACAP1	ArfGAP with coiled-coil, ankyrin repeat and PH domains 1	17p13.1	HGNC:16467	9744	ENSG00000072818
ACAT1	Approved symbol	ACAT1	acetyl-CoA acetyltransferase 1	11q22.3	HGNC:93	38	ENSG00000075239
ACOT8	Approved symbol	ACOT8	acyl-CoA thioesterase 8	20q13.12	HGNC:15919	10005	ENSG00000101473
ACP1	Approved symbol	ACP1	acid phosphatase 1	2p25.3	HGNC:122	52	ENSG00000143727
ADAL	Approved symbol	ADAL	adenosine deaminase like	15q15.3	HGNC:31853	161823	ENSG00000168803
ADHFE1	Approved symbol	ADHFE1	alcohol dehydrogenase, iron containing 1	8q13.1	HGNC:16354	137872	ENSG00000147576
AGTPBP1	Approved symbol	AGTPBP1	ATP/GTP binding protein 1	9q21.33	HGNC:17258	23287	ENSG00000135049
AIFM1	Approved symbol	AIFM1	apoptosis inducing factor mitochondria associated 1	Xq26.1	HGNC:8768	9131	ENSG00000156709
AKAP7	Approved symbol	AKAP7	A-kinase anchoring protein 7	6q23.2	HGNC:377	9465	ENSG00000118507
ALDH1A1	Approved symbol	ALDH1A1	aldehyde dehydrogenase 1 family member A1	9q21.13	HGNC:402	216	ENSG00000165092
ALKBH3	Approved symbol	ALKBH3	alkB homolog 3, alpha-ketoglutaratedependent dioxygenase	11p11.2	HGNC:30141	221120	ENSG00000166199
ALKBH7	Approved symbol	ALKBH7	alkB homolog 7	19p13.3	HGNC:21306	84266	ENSG00000125652
ALKBH8	Approved symbol	ALKBH8	alkB homolog 8, tRNA methyltransferase	11q22.3	HGNC:25189	91801	ENSG00000137760
AMZ2P1	Approved symbol	AMZ2P1	archaelysin family metallopeptidase 2 pseudogene 1	17q24.1	HGNC:26491	201283	ENSG00000214174
ANAPC15	Approved symbol	ANAPC15	anaphase promoting complex subunit 15	11q13.4	HGNC:24531	25906	ENSG00000110200
ANAPC16	Approved symbol	ANAPC16	anaphase promoting complex subunit 16	10q22.1	HGNC:26976	119504	ENSG00000166295
ANK1	Approved symbol	ANK1	ankyrin 1	8p11.21	HGNC:492	286	ENSG00000029534
ANKRD26	Approved symbol	ANKRD26	ankyrin repeat domain 26	10p12.1	HGNC:29186	22852	ENSG00000107890
AP5M1	Approved symbol	AP5M1	adaptor related protein complex 5 mu 1 subunit	14q22.3	HGNC:20192	55745	ENSG00000053770
APOO	Approved symbol	APOO	apolipoprotein O	Xp22.11	HGNC:28727	79135	ENSG00000184831
APOOL	Approved symbol	APOOL	apolipoprotein O like	Xq21.1	HGNC:24009	139322	ENSG00000155008
APOOP5	Approved symbol	APOOP5	apolipoprotein O pseudogene 5	16q21	HGNC:48743	644649	ENSG00000260240
AQP4	Approved symbol	AQP4	aquaporin 4	18q11.2	HGNC:637	361	ENSG00000171885
ARHGEF6	Approved symbol	ARHGEF6	Rac/Cdc42 guanine nucleotide exchange factor 6	Xq26.3	HGNC:685	9459	ENSG00000129675
ARL1	Approved symbol	ARL1	ADP ribosylation factor like GTPase 1	12q23.2	HGNC:692	400	ENSG00000120805
ARMC1	Approved symbol	ARMC1	armadillo repeat containing 1	8q13.1	HGNC:17684	55156	ENSG00000104442
ARPC5L	Approved symbol	ARPC5L	actin related protein 2/3 complex subunit 5 like	9q33.3	HGNC:23366	81873	ENSG00000136950
ARV1	Approved symbol	ARV1	ARV1 homolog, fatty acid homeostasis modulator	1q42.2	HGNC:29561	64801	ENSG00000173409
ASPA	Approved symbol	ASPA	aspartoacylase	17p13.2	HGNC:756	443	ENSG00000108381
ATP5A1	Previous symbol	ATP5F1A	ATP synthase F1 subunit alpha	18q21.1	HGNC:823	498	ENSG00000152234
ATP5B	Previous symbol	ATP5F1B	ATP synthase F1 subunit beta	12q13.3	HGNC:830	506	ENSG00000110955
ATP5F1	Previous symbol	ATP5PB	ATP synthase peripheral stalk-membrane subunit b	1p13.2	HGNC:840	515	ENSG00000116459
ATP5G1	Previous symbol	ATP5MC1	ATP synthase membrane subunit c locus 1	17q21.32	HGNC:841	516	ENSG00000159199
ATP5G3	Previous symbol	ATP5MC3	ATP synthase membrane subunit c locus 3	2q31.1	HGNC:843	518	ENSG00000154518
ATP5O	Previous symbol	ATP5PO	ATP synthase peripheral stalk subunit OSCP	21q22.11	HGNC:850	539	ENSG00000241837
ATP6V1E1	Approved symbol	ATP6V1E1	ATPase H+ transporting V1 subunit E1	22q11.21	HGNC:857	529	ENSG00000131100
ATPAF1	Approved symbol	ATPAF1	ATP synthase mitochondrial F1 complex assembly factor 1	1p33	HGNC:18803	64756	ENSG00000123472
ATPAF2	Approved symbol	ATPAF2	ATP synthase mitochondrial F1 complex assembly factor 2	17p11.2	HGNC:18802	91647	ENSG00000171953
AUH	Approved symbol	AUH	AU RNA binding methylglutaconyl-CoA hydratase	9q22.31	HGNC:890	549	ENSG00000148090
AURKA	Approved symbol	AURKA	aurora kinase A	20q13.2	HGNC:11393	6790	ENSG00000087586
B3GALT1	Approved symbol	B3GALT1	beta-1,3-galactosyltransferase 1	2q24.3	HGNC:916	8708	ENSG00000172318
BAD	Approved symbol	BAD	BCL2 associated agonist of cell death	11q13.1	HGNC:936	572	ENSG00000002330
BANF1	Approved symbol	BANF1	barrier to autointegration factor 1	11q13.1	HGNC:17397	8815	ENSG00000175334
BCKDHB	Approved symbol	BCKDHB	branched chain keto acid dehydrogenase E1 subunit beta	6q14.1	HGNC:987	594	ENSG00000083123
BDH1	Approved symbol	BDH1	3-hydroxybutyrate dehydrogenase 1	3q29	HGNC:1027	622	ENSG00000161267
BIVM	Approved symbol	BIVM	basic, immunoglobulin-like variable motif containing	13q33.1	HGNC:16034	54841	ENSG00000134897
BNIP3	Approved symbol	BNIP3	BCL2 interacting protein 3	10q26.3	HGNC:1084	664	ENSG00000176171
BOLL	Approved symbol	BOLL	boule homolog, RNA binding protein	2q33.1	HGNC:14273	66037	ENSG00000152430
C10orf71-AS1	Approved symbol	C10orf71-AS1	C10orf71 antisense RNA 1	10q11.23	HGNC:45007	100506769	ENSG00000236208
C11orf83	Previous symbol	UQCC3	ubiquinol-cytochrome c reductase complex assembly factor 3	11q12.3	HGNC:34399	790955	ENSG00000204922
C12orf39	Previous symbol	SPX	spexin hormone	12p12.1	HGNC:28139	80763	ENSG00000134548
C12orf66	Approved symbol	C12orf66	chromosome 12 open reading frame 66	12q14.2	HGNC:26517	144577	ENSG00000174206
C15orf61	Approved symbol	C15orf61	chromosome 15 open reading frame 61	15q23	HGNC:34453	145853	ENSG00000189227
C16orf87	Approved symbol	C16orf87	chromosome 16 open reading frame 87	16q11.2	HGNC:33754	388272	ENSG00000155330
C16orf95	Approved symbol	C16orf95	chromosome 16 open reading frame 95	16q24.2	HGNC:40033	100506581	ENSG00000260456
C17orf75	Approved symbol	C17orf75	chromosome 17 open reading frame 75	17q11.2	HGNC:30173	64149	ENSG00000108666
C17orf89	Previous symbol	NDUFAF8	NADH:ubiquinone oxidoreductase complex assembly factor 8	17q25.3	HGNC:33551	284184	ENSG00000224877
C19orf70	Approved symbol	C19orf70	chromosome 19 open reading frame 70	19p13.3	HGNC:33702	125988	ENSG00000174917
C1orf122	Approved symbol	C1orf122	chromosome 1 open reading frame 122	1p34.3	HGNC:24789	127687	ENSG00000197982
C21orf119	Previous symbol	URB1-AS1	URB1 antisense RNA 1 (head to head)	21q22.11	HGNC:23128	84996	ENSG00000256073
C21orf33	Previous symbol	GATD3A	glutamine amidotransferase like class 1 domain containing 3A	21q22.3	HGNC:1273	8209	ENSG00000160221
C2orf47	Previous symbol	MAIP1	matrix AAA peptidase interacting protein 1	2q33.1	HGNC:26198	79568	ENSG00000162972
C2orf88	Approved symbol	C2orf88	chromosome 2 open reading frame 88	2q32.2	HGNC:28191	84281	ENSG00000187699
C3orf17	Previous symbol	NEPRO	nucleolus and neural progenitor protein	3q13.2	HGNC:24496	25871	ENSG00000163608
C3orf43	Previous symbol	SMCO1	single-pass membrane protein with coiled-coil domains 1	3q29	HGNC:27407	255798	ENSG00000214097
C4orf29	Previous symbol	ABHD18	abhydrolase domain containing 18	4q28.2	HGNC:26111	80167	ENSG00000164074
C6orf136	Approved symbol	C6orf136	chromosome 6 open reading frame 136	6p21.33	HGNC:21301	221545	ENSG00000204564
C6orf203	Approved symbol	C6orf203	chromosome 6 open reading frame 203	6q21	HGNC:17971	51250	ENSG00000130349
C7orf55	Previous symbol	FMC1	formation of mitochondrial complex V assembly factor 1 homolog	7q34	HGNC:26946	154791	ENSG00000164898
C9orf3	Approved symbol	C9orf3	chromosome 9 open reading frame 3	9q22.32	HGNC:1361	84909	ENSG00000148120
C9orf41	Previous symbol	CARNMT1	carnosine N-methyltransferase 1	9q21.13	HGNC:23435	138199	ENSG00000156017
CA14	Approved symbol	CA14	carbonic anhydrase 14	1q21.2	HGNC:1372	23632	ENSG00000118298
CA2	Approved symbol	CA2	carbonic anhydrase 2	8q21.2	HGNC:1373	760	ENSG00000104267
CA3	Approved symbol	CA3	carbonic anhydrase 3	8q21.2	HGNC:1374	761	ENSG00000164879
CACYBP	Approved symbol	CACYBP	calcyclin binding protein	1q25.1	HGNC:30423	27101	ENSG00000116161
CARS2	Approved symbol	CARS2	cysteinyl-tRNA synthetase 2, mitochondrial	13q34	HGNC:25695	79587	ENSG00000134905
CAV3	Approved symbol	CAV3	caveolin 3	3p25.3	HGNC:1529	859	ENSG00000182533
CBR4	Approved symbol	CBR4	carbonyl reductase 4	4q32.3	HGNC:25891	84869	ENSG00000145439
CCDC125	Approved symbol	CCDC125	coiled-coil domain containing 125	5q13.2	HGNC:28924	202243	ENSG00000183323
CCDC91	Approved symbol	CCDC91	coiled-coil domain containing 91	12p11.22	HGNC:24855	55297	ENSG00000123106
CD274	Approved symbol	CD274	CD274 molecule	9p24.1	HGNC:17635	29126	ENSG00000120217
CDK15	Approved symbol	CDK15	cyclin dependent kinase 15	2q33.1	HGNC:14434	65061	ENSG00000138395
CDKN1C	Approved symbol	CDKN1C	cyclin dependent kinase inhibitor 1C	11p15.4	HGNC:1786	1028	ENSG00000129757
CDKN2C	Approved symbol	CDKN2C	cyclin dependent kinase inhibitor 2C	1p32.3	HGNC:1789	1031	ENSG00000123080
CEBPD	Approved symbol	CEBPD	CCAAT enhancer binding protein delta	8q11.21	HGNC:1835	1052	ENSG00000221869
CENPL	Approved symbol	CENPL	centromere protein L	1q25.1	HGNC:17879	91687	ENSG00000120334
CEP76	Approved symbol	CEP76	centrosomal protein 76	18p11.21	HGNC:25727	79959	ENSG00000101624
CHCHD10	Approved symbol	CHCHD10	coiled-coil-helix-coiled-coil-helix domain containing 10	22q11.23	HGNC:15559	400916	ENSG00000250479
CHCHD2	Approved symbol	CHCHD2	coiled-coil-helix-coiled-coil-helix domain containing 2	7p11.2	HGNC:21645	51142	ENSG00000106153
CHCHD3	Approved symbol	CHCHD3	coiled-coil-helix-coiled-coil-helix domain containing 3	7q32.3-q33	HGNC:21906	54927	ENSG00000106554
CHCHD7	Approved symbol	CHCHD7	coiled-coil-helix-coiled-coil-helix domain containing 7	8q12.1	HGNC:28314	79145	ENSG00000170791
CIDECP	Approved symbol	CIDECP	cell death-inducing DFFA-like effector c pseudogene	3p25.3	HGNC:24230	152302	ENSG00000186162
CINP	Approved symbol	CINP	cyclin dependent kinase 2 interacting protein	14q32.31	HGNC:23789	51550	ENSG00000100865
CISD3	Approved symbol	CISD3	CDGSH iron sulfur domain 3	17q12	HGNC:27578	284106	ENSG00000277972
CKB	Approved symbol	CKB	creatine kinase B	14q32.33	HGNC:1991	1152	ENSG00000166165
CKMT2	Approved symbol	CKMT2	creatine kinase, mitochondrial 2	5q14.1	HGNC:1996	1160	ENSG00000131730
CLASP2	Approved symbol	CLASP2	cytoplasmic linker associated protein 2	3p22.3	HGNC:17078	23122	ENSG00000163539
CLYBL	Approved symbol	CLYBL	citrate lyase beta like	13q32.3	HGNC:18355	171425	ENSG00000125246
CMAS	Approved symbol	CMAS	cytidine monophosphate N-acetylneuraminic acid synthetase	12p12.1	HGNC:18290	55907	ENSG00000111726
CNEP1R1	Approved symbol	CNEP1R1	CTD nuclear envelope phosphatase 1 regulatory subunit 1	16q12.1	HGNC:26759	255919	ENSG00000205423
CNOT6	Approved symbol	CNOT6	CCR4-NOT transcription complex subunit 6	5q35.3	HGNC:14099	57472	ENSG00000113300
CNOT7	Approved symbol	CNOT7	CCR4-NOT transcription complex subunit 7	8p22	HGNC:14101	29883	ENSG00000198791
COG2	Approved symbol	COG2	component of oligomeric golgi complex 2	1q42.2	HGNC:6546	22796	ENSG00000135775
COPB2	Approved symbol	COPB2	coatomer protein complex subunit beta 2	3q23	HGNC:2232	9276	ENSG00000184432
COPRS	Approved symbol	COPRS	coordinator of PRMT5 and differentiation stimulator	17q11.2	HGNC:28848	55352	ENSG00000172301
COPS3	Approved symbol	COPS3	COP9 signalosome subunit 3	17p11.2	HGNC:2239	8533	ENSG00000141030
COPS8	Approved symbol	COPS8	COP9 signalosome subunit 8	2q37.3	HGNC:24335	10920	ENSG00000198612
COQ10A	Approved symbol	COQ10A	coenzyme Q10A	12q13.3	HGNC:26515	93058	ENSG00000135469
COQ2	Approved symbol	COQ2	coenzyme Q2, polyprenyltransferase	4q21.23	HGNC:25223	27235	ENSG00000173085
COQ3	Approved symbol	COQ3	coenzyme Q3, methyltransferase	6q16.2	HGNC:18175	51805	ENSG00000132423
COQ6	Approved symbol	COQ6	coenzyme Q6, monooxygenase	14q24.3	HGNC:20233	51004	ENSG00000119723
COQ9	Approved symbol	COQ9	coenzyme Q9	16q21	HGNC:25302	57017	ENSG00000088682
COX11	Approved symbol	COX11	COX11, cytochrome c oxidase copper chaperone	17q22	HGNC:2261	1353	ENSG00000166260
COX14	Approved symbol	COX14	COX14, cytochrome c oxidase assembly factor	12q13.12	HGNC:28216	84987	ENSG00000178449
COX19	Approved symbol	COX19	COX19, cytochrome c oxidase assembly factor	7p22.3	HGNC:28074	90639	ENSG00000240230
COX4I1	Approved symbol	COX4I1	cytochrome c oxidase subunit 4I1	16q24.1	HGNC:2265	1327	ENSG00000131143
COX5A	Approved symbol	COX5A	cytochrome c oxidase subunit 5A	15q24.2	HGNC:2267	9377	ENSG00000178741
COX8A	Approved symbol	COX8A	cytochrome c oxidase subunit 8A	11q13.1	HGNC:2294	1351	ENSG00000176340
CPEB3	Approved symbol	CPEB3	cytoplasmic polyadenylation element binding protein 3	10q23.32	HGNC:21746	22849	ENSG00000107864
CPPED1	Approved symbol	CPPED1	calcineurin like phosphoesterase domain containing 1	16p13.12	HGNC:25632	55313	ENSG00000103381
CSTF2T	Approved symbol	CSTF2T	cleavage stimulation factor subunit 2 tau variant	10q21.1	HGNC:17086	23283	ENSG00000177613
CWC27	Approved symbol	CWC27	CWC27 spliceosome associated protein homolog	5q12.3	HGNC:10664	10283	ENSG00000153015
CXorf40A	Approved symbol	CXorf40A	chromosome X open reading frame 40A	Xq28	HGNC:28089	91966	ENSG00000197620
CXorf40B	Approved symbol	CXorf40B	chromosome X open reading frame 40B	Xq28	HGNC:17402	541578	ENSG00000197021
CYB5B	Approved symbol	CYB5B	cytochrome b5 type B	16q22.1	HGNC:24374	80777	ENSG00000103018
CYC1	Approved symbol	CYC1	cytochrome c1	8q24.3	HGNC:2579	1537	ENSG00000179091
CYCS	Approved symbol	CYCS	cytochrome c, somatic	7p15.3	HGNC:19986	54205	ENSG00000172115
DARS2	Approved symbol	DARS2	aspartyl-tRNA synthetase 2, mitochondrial	1q25.1	HGNC:25538	55157	ENSG00000117593
DBT	Approved symbol	DBT	dihydrolipoamide branched chain transacylase E2	1p21.2	HGNC:2698	1629	ENSG00000137992
DCAF8L1	Approved symbol	DCAF8L1	DDB1 and CUL4 associated factor 8 like 1	Xp21.3	HGNC:31810	139425	ENSG00000226372
DCAF8L2	Approved symbol	DCAF8L2	DDB1 and CUL4 associated factor 8 like 2	Xp21.3	HGNC:31811	347442	ENSG00000189186
DCTPP1	Approved symbol	DCTPP1	dCTP pyrophosphatase 1	16p11.2	HGNC:28777	79077	ENSG00000179958
DDT	Approved symbol	DDT	D-dopachrome tautomerase	22q11.23	HGNC:2732	1652	ENSG00000099977
DDTL	Approved symbol	DDTL	D-dopachrome tautomerase like	22q11.23	HGNC:33446	100037417	ENSG00000099974
DECR1	Approved symbol	DECR1	2,4-dienoyl-CoA reductase 1	8q21.3	HGNC:2753	1666	ENSG00000104325
DESI2	Approved symbol	DESI2	desumoylating isopeptidase 2	1q44	HGNC:24264	51029	ENSG00000121644
DHRS4	Approved symbol	DHRS4	dehydrogenase/reductase 4	14q11.2	HGNC:16985	10901	ENSG00000157326
DHRS4L1	Approved symbol	DHRS4L1	dehydrogenase/reductase 4 like 1	14q11.2	HGNC:19732	728635	ENSG00000225766
DHRS4L2	Approved symbol	DHRS4L2	dehydrogenase/reductase 4 like 2	14q11.2	HGNC:19731	317749	ENSG00000187630
DHRSX	Approved symbol	DHRSX	dehydrogenase/reductase X-linked	Xp22.33 and Yp11.2	HGNC:18399	207063	ENSG00000169084
DLAT	Approved symbol	DLAT	dihydrolipoamide S-acetyltransferase	11q23.1	HGNC:2896	1737	ENSG00000150768
DLD	Approved symbol	DLD	dihydrolipoamide dehydrogenase	7q31.1	HGNC:2898	1738	ENSG00000091140
DLST	Approved symbol	DLST	dihydrolipoamide S-succinyltransferase	14q24.3	HGNC:2911	1743	ENSG00000119689
DNAJC25	Approved symbol	DNAJC25	DnaJ heat shock protein family (Hsp40) member C25	9q31.3	HGNC:34187	548645	ENSG00000059769
DNM1L	Approved symbol	DNM1L	dynamin 1 like	12p11.21	HGNC:2973	10059	ENSG00000087470
DPH5	Approved symbol	DPH5	diphthamide biosynthesis 5	1p21.2	HGNC:24270	51611	ENSG00000117543
DRG1	Approved symbol	DRG1	developmentally regulated GTP binding protein 1	22q12.2	HGNC:3029	4733	ENSG00000185721
DUSP13	Approved symbol	DUSP13	dual specificity phosphatase 13	10q22.2	HGNC:19681	51207	ENSG00000079393
DYRK4	Approved symbol	DYRK4	dual specificity tyrosine phosphorylation regulated kinase 4	12p13.32	HGNC:3095	8798	ENSG00000010219
DZIP3	Approved symbol	DZIP3	DAZ interacting zinc finger protein 3	3q13.13	HGNC:30938	9666	ENSG00000198919
ECHDC1	Approved symbol	ECHDC1	ethylmalonyl-CoA decarboxylase 1	6q22.33	HGNC:21489	55862	ENSG00000093144
ECI2	Approved symbol	ECI2	enoyl-CoA delta isomerase 2	6p25.2	HGNC:14601	10455	ENSG00000198721
EEF1G	Approved symbol	EEF1G	eukaryotic translation elongation factor 1 gamma	11q12.3	HGNC:3213	1937	ENSG00000254772
EFR3B	Approved symbol	EFR3B	EFR3 homolog B	2p23.3	HGNC:29155	22979	ENSG00000084710
EGFLAM	Approved symbol	EGFLAM	EGF like, fibronectin type III and laminin G domains	5p13.2-p13.1	HGNC:26810	133584	ENSG00000164318
EID1	Approved symbol	EID1	EP300 interacting inhibitor of differentiation 1	15q21.1	HGNC:1191	23741	ENSG00000255302
EIF1B	Approved symbol	EIF1B	eukaryotic translation initiation factor 1B	3p22.1	HGNC:30792	10289	ENSG00000114784
EIF2B3	Approved symbol	EIF2B3	eukaryotic translation initiation factor 2B subunit gamma	1p34.1	HGNC:3259	8891	ENSG00000070785
EIF2D	Approved symbol	EIF2D	eukaryotic translation initiation factor 2D	1q32.1	HGNC:6583	1939	ENSG00000143486
EIF3K	Approved symbol	EIF3K	eukaryotic translation initiation factor 3 subunit K	19q13.2	HGNC:24656	27335	ENSG00000178982
EIF4EBP1	Approved symbol	EIF4EBP1	eukaryotic translation initiation factor 4E binding protein 1	8p11.23	HGNC:3288	1978	ENSG00000187840
ELP5	Approved symbol	ELP5	elongator acetyltransferase complex subunit 5	17p13.1	HGNC:30617	23587	ENSG00000170291
EMC4	Approved symbol	EMC4	ER membrane protein complex subunit 4	15q14	HGNC:28032	51234	ENSG00000128463
EMC9	Approved symbol	EMC9	ER membrane protein complex subunit 9	14q12	HGNC:20273	51016	ENSG00000100908
ENPP5	Approved symbol	ENPP5	ectonucleotide pyrophosphatase/phosphodiesterase 5 (putative)	6p21.1	HGNC:13717	59084	ENSG00000112796
ENY2	Approved symbol	ENY2	ENY2, transcription and export complex 2 subunit	8q23.1	HGNC:24449	56943	ENSG00000120533
ETFA	Approved symbol	ETFA	electron transfer flavoprotein alpha subunit	15q24.2-q24.3	HGNC:3481	2108	ENSG00000140374
ETFB	Approved symbol	ETFB	electron transfer flavoprotein beta subunit	19q13.41	HGNC:3482	2109	ENSG00000105379
ETFDH	Approved symbol	ETFDH	electron transfer flavoprotein dehydrogenase	4q32.1	HGNC:3483	2110	ENSG00000171503
ETHE1	Approved symbol	ETHE1	ETHE1, persulfide dioxygenase	19q13.31	HGNC:23287	23474	ENSG00000105755
FAHD1	Approved symbol	FAHD1	fumarylacetoacetate hydrolase domain containing 1	16p13.3	HGNC:14169	81889	ENSG00000180185
FAM114A2	Approved symbol	FAM114A2	family with sequence similarity 114 member A2	5q33.2	HGNC:1333	10827	ENSG00000055147
FAM149B1	Approved symbol	FAM149B1	family with sequence similarity 149 member B1	10q22.2	HGNC:29162	317662	ENSG00000138286
FAM173B	Approved symbol	FAM173B	family with sequence similarity 173 member B	5p15.2	HGNC:27029	134145	ENSG00000150756
FAM185A	Approved symbol	FAM185A	family with sequence similarity 185 member A	7q22.1	HGNC:22412	222234	ENSG00000222011
FAM210A	Approved symbol	FAM210A	family with sequence similarity 210 member A	18p11.21	HGNC:28346	125228	ENSG00000177150
FAM210B	Approved symbol	FAM210B	family with sequence similarity 210 member B	20q13.2	HGNC:16102	116151	ENSG00000124098
FASTKD1	Approved symbol	FASTKD1	FAST kinase domains 1	2q31.1	HGNC:26150	79675	ENSG00000138399
FASTKD5	Approved symbol	FASTKD5	FAST kinase domains 5	20p13	HGNC:25790	60493	ENSG00000215251
FBXO44	Approved symbol	FBXO44	F-box protein 44	1p36.22	HGNC:24847	93611	ENSG00000132879
FBXO6	Approved symbol	FBXO6	F-box protein 6	1p36.22	HGNC:13585	26270	ENSG00000116663
FDX1	Approved symbol	FDX1	ferredoxin 1	11q22.3	HGNC:3638	2230	ENSG00000137714
FH	Approved symbol	FH	fumarate hydratase	1q43	HGNC:3700	2271	ENSG00000091483
FHIT	Approved symbol	FHIT	fragile histidine triad	3p14.2	HGNC:3701	2272	ENSG00000189283
FITM1	Approved symbol	FITM1	fat storage inducing transmembrane protein 1	14q12	HGNC:33714	161247	ENSG00000139914
FKBP3	Approved symbol	FKBP3	FK506 binding protein 3	14q21.2	HGNC:3719	2287	ENSG00000100442
FLAD1	Approved symbol	FLAD1	flavin adenine dinucleotide synthetase 1	1q21.3	HGNC:24671	80308	ENSG00000160688
FLRT3	Approved symbol	FLRT3	fibronectin leucine rich transmembrane protein 3	20p12.1	HGNC:3762	23767	ENSG00000125848
FNDC5	Approved symbol	FNDC5	fibronectin type III domain containing 5	1p35.1	HGNC:20240	252995	ENSG00000160097
FOPNL	Approved symbol	FOPNL	FGFR1OP N-terminal like	16p13.11	HGNC:26435	123811	ENSG00000133393
FOXRED1	Approved symbol	FOXRED1	FAD dependent oxidoreductase domain containing 1	11q24.2	HGNC:26927	55572	ENSG00000110074
FRMPD1	Approved symbol	FRMPD1	FERM and PDZ domain containing 1	9p13.2	HGNC:29159	22844	ENSG00000070601
FTCDNL1	Approved symbol	FTCDNL1	formiminotransferase cyclodeaminase N-terminal like	2q33.1	HGNC:48661	348751	ENSG00000226124
FTH1	Approved symbol	FTH1	ferritin heavy chain 1	11q12.3	HGNC:3976	2495	ENSG00000167996
FTH1P3	Approved symbol	FTH1P3	ferritin heavy chain 1 pseudogene 3	2p23.3	HGNC:3990	2498	ENSG00000213453
GALE	Approved symbol	GALE	UDP-galactose-4-epimerase	1p36.11	HGNC:4116	2582	ENSG00000117308
GALK2	Approved symbol	GALK2	galactokinase 2	15q21.1-q21.2	HGNC:4119	2585	ENSG00000156958
GBAS	Previous symbol	NIPSNAP2	nipsnap homolog 2	7p11.2	HGNC:4179	2631	ENSG00000146729
GCAT	Approved symbol	GCAT	glycine C-acetyltransferase	22q13.1	HGNC:4188	23464	ENSG00000100116
GEMIN7	Approved symbol	GEMIN7	gem nuclear organelle associated protein 7	19q13.32	HGNC:20045	79760	ENSG00000142252
GFM1	Approved symbol	GFM1	G elongation factor mitochondrial 1	3q25.32	HGNC:13780	85476	ENSG00000168827
GFM2	Approved symbol	GFM2	G elongation factor mitochondrial 2	5q13.3	HGNC:29682	84340	ENSG00000164347
GGCT	Approved symbol	GGCT	gamma-glutamylcyclotransferase	7p14.3	HGNC:21705	79017	ENSG00000006625
GHITM	Approved symbol	GHITM	growth hormone inducible transmembrane protein	10q23.1	HGNC:17281	27069	ENSG00000165678
GINM1	Approved symbol	GINM1	glycoprotein integral membrane 1	6q25.1	HGNC:21074	116254	ENSG00000055211
GLO1	Approved symbol	GLO1	glyoxalase I	6p21.2	HGNC:4323	2739	ENSG00000124767
GLRX5	Approved symbol	GLRX5	glutaredoxin 5	14q32.13	HGNC:20134	51218	ENSG00000182512
GLUD1	Approved symbol	GLUD1	glutamate dehydrogenase 1	10q23.2	HGNC:4335	2746	ENSG00000148672
GOT1	Approved symbol	GOT1	glutamic-oxaloacetic transaminase 1	10q24.2	HGNC:4432	2805	ENSG00000120053
GOT2	Approved symbol	GOT2	glutamic-oxaloacetic transaminase 2	16q21	HGNC:4433	2806	ENSG00000125166
GPR155	Approved symbol	GPR155	G protein-coupled receptor 155	2q31.1	HGNC:22951	151556	ENSG00000163328
GRPEL1	Approved symbol	GRPEL1	GrpE like 1, mitochondrial	4p16.1	HGNC:19696	80273	ENSG00000109519
GSTK1	Approved symbol	GSTK1	glutathione S-transferase kappa 1	7q34	HGNC:16906	373156	ENSG00000197448
GSTM3	Approved symbol	GSTM3	glutathione S-transferase mu 3	1p13.3	HGNC:4635	2947	ENSG00000134202
GSTZ1	Approved symbol	GSTZ1	glutathione S-transferase zeta 1	14q24.3	HGNC:4643	2954	ENSG00000100577
GTF2F2	Approved symbol	GTF2F2	general transcription factor IIF subunit 2	13q14.12-q14.13	HGNC:4653	2963	ENSG00000188342
GTF2IRD2	Approved symbol	GTF2IRD2	GTF2I repeat domain containing 2	7q11.23	HGNC:30775	84163	ENSG00000196275
GTF2IRD2B	Approved symbol	GTF2IRD2B	GTF2I repeat domain containing 2B	7q11.23	HGNC:33125	389524	ENSG00000174428
GTPBP8	Approved symbol	GTPBP8	GTP binding protein 8 (putative)	3q13.2	HGNC:25007	29083	ENSG00000163607
GYPC	Approved symbol	GYPC	glycophorin C (Gerbich blood group)	2q14.3	HGNC:4704	2995	ENSG00000136732
HARS2	Approved symbol	HARS2	histidyl-tRNA synthetase 2, mitochondrial	5q31.3	HGNC:4817	23438	ENSG00000112855
HCCS	Approved symbol	HCCS	holocytochrome c synthase	Xp22.2	HGNC:4837	3052	ENSG00000004961
HCFC1R1	Approved symbol	HCFC1R1	host cell factor C1 regulator 1	16p13.3	HGNC:21198	54985	ENSG00000103145
HDDC3	Approved symbol	HDDC3	HD domain containing 3	15q26.1	HGNC:30522	374659	ENSG00000184508
HDHD1	Previous symbol	PUDP	pseudouridine 5'-phosphatase	Xp22.31	HGNC:16818	8226	ENSG00000130021
HEATR5A	Approved symbol	HEATR5A	HEAT repeat containing 5A	14q12	HGNC:20276	25938	ENSG00000129493
HES6	Approved symbol	HES6	hes family bHLH transcription factor 6	2q37.3	HGNC:18254	55502	ENSG00000144485
HIBADH	Approved symbol	HIBADH	3-hydroxyisobutyrate dehydrogenase	7p15.2	HGNC:4907	11112	ENSG00000106049
HIGD2A	Approved symbol	HIGD2A	HIG1 hypoxia inducible domain family member 2A	5q35.2	HGNC:28311	192286	ENSG00000146066
HINT2	Approved symbol	HINT2	histidine triad nucleotide binding protein 2	9p13.3	HGNC:18344	84681	ENSG00000137133
HLTF	Approved symbol	HLTF	helicase like transcription factor	3q24	HGNC:11099	6596	ENSG00000071794
HMBS	Approved symbol	HMBS	hydroxymethylbilane synthase	11q23.3	HGNC:4982	3145	ENSG00000256269
HMOX2	Approved symbol	HMOX2	heme oxygenase 2	16p13.3	HGNC:5014	3163	ENSG00000103415
HNRNPA2B1	Approved symbol	HNRNPA2B1	heterogeneous nuclear ribonucleoprotein A2/B1	7p15.2	HGNC:5033	3181	ENSG00000122566
HOXA10	Approved symbol	HOXA10	homeobox A10	7p15.2	HGNC:5100	3206	ENSG00000253293
HPCAL1	Approved symbol	HPCAL1	hippocalcin like 1	2p25.1	HGNC:5145	3241	ENSG00000115756
HRASLS	Approved symbol	HRASLS	HRAS like suppressor	3q29	HGNC:14922	57110	ENSG00000127252
HS3ST5	Approved symbol	HS3ST5	heparan sulfate-glucosamine 3-sulfotransferase 5	6q21-q22.1	HGNC:19419	222537	ENSG00000249853
HSBP1L1	Approved symbol	HSBP1L1	heat shock factor binding protein 1 like 1	18q23	HGNC:37243	440498	ENSG00000226742
HSDL1	Approved symbol	HSDL1	hydroxysteroid dehydrogenase like 1	16q24.1	HGNC:16475	83693	ENSG00000103160
HYAL1	Approved symbol	HYAL1	hyaluronoglucosaminidase 1	3p21.31	HGNC:5320	3373	ENSG00000114378
ICAM3	Approved symbol	ICAM3	intercellular adhesion molecule 3	19p13.2	HGNC:5346	3385	ENSG00000076662
ICT1	Previous symbol	MRPL58	mitochondrial ribosomal protein L58	17q25.1	HGNC:5359	3396	ENSG00000167862
IDI2	Approved symbol	IDI2	isopentenyl-diphosphate delta isomerase 2	10p15.3	HGNC:23487	91734	ENSG00000148377
IL11RA	Approved symbol	IL11RA	interleukin 11 receptor subunit alpha	9p13.3	HGNC:5967	3590	ENSG00000137070
IMMT	Approved symbol	IMMT	inner membrane mitochondrial protein	2p11.2	HGNC:6047	10989	ENSG00000132305
INCA1	Approved symbol	INCA1	inhibitor of CDK, cyclin A1 interacting protein 1	17p13.2	HGNC:32224	388324	ENSG00000196388
INIP	Approved symbol	INIP	INTS3 and NABP interacting protein	9q32	HGNC:24994	58493	ENSG00000148153
IQCH-AS1	Approved symbol	IQCH-AS1	IQCH antisense RNA 1	15q23	HGNC:44104	100506686	ENSG00000259673
ISCA1	Approved symbol	ISCA1	iron-sulfur cluster assembly 1	9q21.33	HGNC:28660	81689	ENSG00000135070
ISCA2	Approved symbol	ISCA2	iron-sulfur cluster assembly 2	14q24.3	HGNC:19857	122961	ENSG00000165898
ISCU	Approved symbol	ISCU	iron-sulfur cluster assembly enzyme	12q23.3	HGNC:29882	23479	ENSG00000136003
ISOC2	Approved symbol	ISOC2	isochorismatase domain containing 2	19q13.42	HGNC:26278	79763	ENSG00000063241
ITGB1BP2	Approved symbol	ITGB1BP2	integrin subunit beta 1 binding protein 2	Xq13.1	HGNC:6154	26548	ENSG00000147166
ITGB6	Approved symbol	ITGB6	integrin subunit beta 6	2q24.2	HGNC:6161	3694	ENSG00000115221
JTB	Approved symbol	JTB	jumping translocation breakpoint	1q21.3	HGNC:6201	10899	ENSG00000143543
KCNB1	Approved symbol	KCNB1	potassium voltage-gated channel subfamily B member 1	20q13.13	HGNC:6231	3745	ENSG00000158445
KIAA0141	Previous symbol	DELE1	DAP3 binding cell death enhancer 1	5q31.3	HGNC:28969	9812	ENSG00000081791
KIAA0391	Approved symbol	KIAA0391	KIAA0391	14q13.2	HGNC:19958	9692	ENSG00000100890
KIAA1161	Previous symbol	MYORG	myogenesis regulating glycosidase (putative)	9p13.3	HGNC:19918	57462	ENSG00000164976
KIAA1279	Previous symbol	KIF1BP	KIF1 binding protein	10q22.1	HGNC:23419	26128	ENSG00000198954
KIF22	Approved symbol	KIF22	kinesin family member 22	16p11.2	HGNC:6391	3835	ENSG00000079616
KLF12	Approved symbol	KLF12	Kruppel like factor 12	13q22.1	HGNC:6346	11278	ENSG00000118922
KLHL31	Approved symbol	KLHL31	kelch like family member 31	6p12.1	HGNC:21353	401265	ENSG00000124743
L2HGDH	Approved symbol	L2HGDH	L-2-hydroxyglutarate dehydrogenase	14q21.3	HGNC:20499	79944	ENSG00000087299
LACE1	Previous symbol	AFG1L	AFG1 like ATPase	6q21	HGNC:16411	246269	ENSG00000135537
LACTB2	Approved symbol	LACTB2	lactamase beta 2	8q13.3	HGNC:18512	51110	ENSG00000147592
LAMTOR1	Approved symbol	LAMTOR1	late endosomal/lysosomal adaptor, MAPK and MTOR activator 1	11q13.4	HGNC:26068	55004	ENSG00000149357
LDHD	Approved symbol	LDHD	lactate dehydrogenase D	16q23.1	HGNC:19708	197257	ENSG00000166816
LDLRAD4	Approved symbol	LDLRAD4	low density lipoprotein receptor class A domain containing 4	18p11.21	HGNC:1224	753	ENSG00000168675
LIAS	Approved symbol	LIAS	lipoic acid synthetase	4p14	HGNC:16429	11019	ENSG00000121897
LINC00843	Approved symbol	LINC00843	long intergenic non-protein coding RNA 843	10q11.23	HGNC:45009	102902672	ENSG00000178440
LINC00888	Approved symbol	LINC00888	long intergenic non-protein coding RNA 888	3q27.1	HGNC:48575	100505687	ENSG00000240024
LINC00909	Approved symbol	LINC00909	long intergenic non-protein coding RNA 909	18q22.3	HGNC:44331	400657	ENSG00000264247
LINC00959	Previous symbol	C10orf143	chromosome 10 open reading frame 143	10q26.3	HGNC:48677	387723	ENSG00000237489
LIPT2	Approved symbol	LIPT2	lipoyl(octanoyl) transferase 2	11q13.4	HGNC:37216	387787	ENSG00000175536
LMO1	Approved symbol	LMO1	LIM domain only 1	11p15.4	HGNC:6641	4004	ENSG00000166407
LOC100287497	Unmatched
LOC100287934	Unmatched
LOC100505761	Unmatched
LOC100506714	Unmatched
LOC100507217	Unmatched
LOC102723721	Unmatched
LOC102724023	Unmatched
LOC102724164	Unmatched
LOC102724567	Unmatched
LOC102724828	Unmatched
LOC102724870	Unmatched
LOC220729	Unmatched
LOC728975	Unmatched
LOC93622	Unmatched
LONRF1	Approved symbol	LONRF1	LON peptidase N-terminal domain and ring finger 1	8p23.1	HGNC:26302	91694	ENSG00000154359
LPL	Approved symbol	LPL	lipoprotein lipase	8p21.3	HGNC:6677	4023	ENSG00000175445
LRRC28	Approved symbol	LRRC28	leucine rich repeat containing 28	15q26.3	HGNC:28355	123355	ENSG00000168904
LRRC39	Approved symbol	LRRC39	leucine rich repeat containing 39	1p21.2	HGNC:28228	127495	ENSG00000122477
LTA4H	Approved symbol	LTA4H	leukotriene A4 hydrolase	12q23.1	HGNC:6710	4048	ENSG00000111144
LYPLA1	Approved symbol	LYPLA1	lysophospholipase I	8q11.23	HGNC:6737	10434	ENSG00000120992
LYRM1	Approved symbol	LYRM1	LYR motif containing 1	16p12.3	HGNC:25074	57149	ENSG00000102897
LYRM7	Approved symbol	LYRM7	LYR motif containing 7	5q23.3-q31.1	HGNC:28072	90624	ENSG00000186687
MAP2K4	Approved symbol	MAP2K4	mitogen-activated protein kinase kinase 4	17p12	HGNC:6844	6416	ENSG00000065559
MAP2K6	Approved symbol	MAP2K6	mitogen-activated protein kinase kinase 6	17q24.3	HGNC:6846	5608	ENSG00000108984
MAP6D1	Approved symbol	MAP6D1	MAP6 domain containing 1	3q27.1	HGNC:25753	79929	ENSG00000180834
MARC2	Approved symbol	MARC2	mitochondrial amidoxime reducing component 2	1q41	HGNC:26064	54996	ENSG00000117791
MASP1	Approved symbol	MASP1	mannan binding lectin serine peptidase 1	3q27.3	HGNC:6901	5648	ENSG00000127241
MB	Approved symbol	MB	myoglobin	22q12.3	HGNC:6915	4151	ENSG00000198125
MCCC2	Approved symbol	MCCC2	methylcrotonoyl-CoA carboxylase 2	5q13.2	HGNC:6937	64087	ENSG00000131844
MCMDC2	Approved symbol	MCMDC2	minichromosome maintenance domain containing 2	8q13.1	HGNC:26368	157777	ENSG00000178460
MCUR1	Approved symbol	MCUR1	mitochondrial calcium uniporter regulator 1	6p23	HGNC:21097	63933	ENSG00000050393
MDH1	Approved symbol	MDH1	malate dehydrogenase 1	2p15	HGNC:6970	4190	ENSG00000014641
ME2	Approved symbol	ME2	malic enzyme 2	18q21.2	HGNC:6984	4200	ENSG00000082212
ME3	Approved symbol	ME3	malic enzyme 3	11q14.2	HGNC:6985	10873	ENSG00000151376
MECR	Approved symbol	MECR	mitochondrial trans-2-enoyl-CoA reductase	1p35.3	HGNC:19691	51102	ENSG00000116353
MED20	Approved symbol	MED20	mediator complex subunit 20	6p21.1	HGNC:16840	9477	ENSG00000124641
METAP1D	Approved symbol	METAP1D	methionyl aminopeptidase type 1D, mitochondrial	2q31.1	HGNC:32583	254042	ENSG00000172878
METAP2	Approved symbol	METAP2	methionyl aminopeptidase 2	12q22	HGNC:16672	10988	ENSG00000111142
METTL15	Approved symbol	METTL15	methyltransferase like 15	11p14.1	HGNC:26606	196074	ENSG00000169519
METTL20	Previous symbol	ETFBKMT	electron transfer flavoprotein beta subunit lysine methyltransferase	12p11.21	HGNC:28739	254013	ENSG00000139160
METTL21A	Approved symbol	METTL21A	methyltransferase like 21A	2q33.3	HGNC:30476	151194	ENSG00000144401
METTL2A	Approved symbol	METTL2A	methyltransferase like 2A	17q23.2	HGNC:25755	339175	ENSG00000087995
MFF	Approved symbol	MFF	mitochondrial fission factor	2q36.3	HGNC:24858	56947	ENSG00000168958
MICU2	Approved symbol	MICU2	mitochondrial calcium uptake 2	13q12.11	HGNC:31830	221154	ENSG00000165487
MINOS1	Approved symbol	MINOS1	mitochondrial inner membrane organizing system 1	1p36.13	HGNC:32068	440574	ENSG00000173436
MIR3654	Approved symbol	MIR3654	microRNA 3654	7q33	HGNC:38896	100500804	ENSG00000284135
MIR6723	Approved symbol	MIR6723	microRNA 6723	1p36.33	HGNC:50152	102465432	ENSG00000278791
MKKS	Approved symbol	MKKS	McKusick-Kaufman syndrome	20p12.2	HGNC:7108	8195	ENSG00000125863
MLEC	Approved symbol	MLEC	malectin	12q24.31	HGNC:28973	9761	ENSG00000110917
MMACHC	Approved symbol	MMACHC	methylmalonic aciduria (cobalamin deficiency) cblC type, with homocystinuria	1p34.1	HGNC:24525	25974	ENSG00000132763
MPC1	Approved symbol	MPC1	mitochondrial pyruvate carrier 1	6q27	HGNC:21606	51660	ENSG00000060762
MPC2	Approved symbol	MPC2	mitochondrial pyruvate carrier 2	1q24.2	HGNC:24515	25874	ENSG00000143158
MPHOSPH6	Approved symbol	MPHOSPH6	M-phase phosphoprotein 6	16q23.3	HGNC:7214	10200	ENSG00000135698
MRFAP1	Approved symbol	MRFAP1	Morf4 family associated protein 1	4p16.1	HGNC:24549	93621	ENSG00000179010
MRP63	Previous symbol	MRPL57	mitochondrial ribosomal protein L57	13q12.11	HGNC:14514	78988	ENSG00000173141
MRPL16	Approved symbol	MRPL16	mitochondrial ribosomal protein L16	11q12.1	HGNC:14476	54948	ENSG00000166902
MRPL19	Approved symbol	MRPL19	mitochondrial ribosomal protein L19	2p12	HGNC:14052	9801	ENSG00000115364
MRPL22	Approved symbol	MRPL22	mitochondrial ribosomal protein L22	5q33.2	HGNC:14480	29093	ENSG00000082515
MRPL35	Approved symbol	MRPL35	mitochondrial ribosomal protein L35	2p11.2	HGNC:14489	51318	ENSG00000132313
MRPL41	Approved symbol	MRPL41	mitochondrial ribosomal protein L41	9q34.3	HGNC:14492	64975	ENSG00000182154
MRPL44	Approved symbol	MRPL44	mitochondrial ribosomal protein L44	2q36.1	HGNC:16650	65080	ENSG00000135900
MRPS12	Approved symbol	MRPS12	mitochondrial ribosomal protein S12	19q13.2	HGNC:10380	6183	ENSG00000128626
MRPS15	Approved symbol	MRPS15	mitochondrial ribosomal protein S15	1p34.3	HGNC:14504	64960	ENSG00000116898
MRPS17	Approved symbol	MRPS17	mitochondrial ribosomal protein S17	7p11.2	HGNC:14047	51373	ENSG00000239789
MRPS18A	Approved symbol	MRPS18A	mitochondrial ribosomal protein S18A	6p21.1	HGNC:14515	55168	ENSG00000096080
MRPS18B	Approved symbol	MRPS18B	mitochondrial ribosomal protein S18B	6p21.33	HGNC:14516	28973	ENSG00000204568
MRPS22	Approved symbol	MRPS22	mitochondrial ribosomal protein S22	3q23	HGNC:14508	56945	ENSG00000175110
MRPS24	Approved symbol	MRPS24	mitochondrial ribosomal protein S24	7p13	HGNC:14510	64951	ENSG00000062582
MRPS35	Approved symbol	MRPS35	mitochondrial ribosomal protein S35	12p11.22	HGNC:16635	60488	ENSG00000061794
MRPS5	Approved symbol	MRPS5	mitochondrial ribosomal protein S5	2q11.1	HGNC:14498	64969	ENSG00000144029
MRPS7	Approved symbol	MRPS7	mitochondrial ribosomal protein S7	17q25.1	HGNC:14499	51081	ENSG00000125445
MRPS9	Approved symbol	MRPS9	mitochondrial ribosomal protein S9	2q12.1	HGNC:14501	64965	ENSG00000135972
MRS2	Approved symbol	MRS2	MRS2, magnesium transporter	6p22.3	HGNC:13785	57380	ENSG00000124532
MSRB2	Approved symbol	MSRB2	methionine sulfoxide reductase B2	10p12.2	HGNC:17061	22921	ENSG00000148450
MTERFD2	Previous symbol	MTERF4	mitochondrial transcription termination factor 4	2q37.3	HGNC:28785	130916	ENSG00000122085
MTFP1	Approved symbol	MTFP1	mitochondrial fission process 1	22q12.2	HGNC:26945	51537	ENSG00000242114
MTFR1L	Approved symbol	MTFR1L	mitochondrial fission regulator 1 like	1p36.11	HGNC:28836	56181	ENSG00000117640
MTG1	Approved symbol	MTG1	mitochondrial ribosome associated GTPase 1	10q26.3	HGNC:32159	92170	ENSG00000148824
MTIF2	Approved symbol	MTIF2	mitochondrial translational initiation factor 2	2p16.1	HGNC:7441	4528	ENSG00000085760
MTO1	Approved symbol	MTO1	mitochondrial tRNA translation optimization 1	6q13	HGNC:19261	25821	ENSG00000135297
MTX2	Approved symbol	MTX2	metaxin 2	2q31.1	HGNC:7506	10651	ENSG00000128654
MUT	Approved symbol	MUT	methylmalonyl-CoA mutase	6p12.3	HGNC:7526	4594	ENSG00000146085
MYL12A	Approved symbol	MYL12A	myosin light chain 12A	18p11.31	HGNC:16701	10627	ENSG00000101608
NADK2	Approved symbol	NADK2	NAD kinase 2, mitochondrial	5p13.2	HGNC:26404	133686	ENSG00000152620
NAPEPLD	Approved symbol	NAPEPLD	N-acyl phosphatidylethanolamine phospholipase D	7q22.1	HGNC:21683	222236	ENSG00000161048
NARS	Approved symbol	NARS	asparaginyl-tRNA synthetase	18q21.31	HGNC:7643	4677	ENSG00000134440
NCBP2-AS2	Approved symbol	NCBP2-AS2	NCBP2 antisense RNA 2 (head to head)	3q29	HGNC:25121	152217	ENSG00000270170
NDUFA10	Approved symbol	NDUFA10	NADH:ubiquinone oxidoreductase subunit A10	2q37.3	HGNC:7684	4705	ENSG00000130414
NDUFA11	Approved symbol	NDUFA11	NADH:ubiquinone oxidoreductase subunit A11	19p13.3	HGNC:20371	126328	ENSG00000174886
NDUFA8	Approved symbol	NDUFA8	NADH:ubiquinone oxidoreductase subunit A8	9q33.2	HGNC:7692	4702	ENSG00000119421
NDUFA9	Approved symbol	NDUFA9	NADH:ubiquinone oxidoreductase subunit A9	12p13.3	HGNC:7693	4704	ENSG00000139180
NDUFAB1	Approved symbol	NDUFAB1	NADH:ubiquinone oxidoreductase subunit AB1	16p12.2	HGNC:7694	4706	ENSG00000004779
NDUFAF3	Approved symbol	NDUFAF3	NADH:ubiquinone oxidoreductase complex assembly factor 3	3p21.31	HGNC:29918	25915	ENSG00000178057
NDUFAF6	Approved symbol	NDUFAF6	NADH:ubiquinone oxidoreductase complex assembly factor 6	8q22.1	HGNC:28625	137682	ENSG00000156170
NDUFAF7	Approved symbol	NDUFAF7	NADH:ubiquinone oxidoreductase complex assembly factor 7	2p22.2	HGNC:28816	55471	ENSG00000003509
NDUFB10	Approved symbol	NDUFB10	NADH:ubiquinone oxidoreductase subunit B10	16p13.3	HGNC:7696	4716	ENSG00000140990
NDUFB11	Approved symbol	NDUFB11	NADH:ubiquinone oxidoreductase subunit B11	Xp11.3	HGNC:20372	54539	ENSG00000147123
NDUFB5	Approved symbol	NDUFB5	NADH:ubiquinone oxidoreductase subunit B5	3q26.33	HGNC:7700	4711	ENSG00000136521
NDUFB7	Approved symbol	NDUFB7	NADH:ubiquinone oxidoreductase subunit B7	19p13.12	HGNC:7702	4713	ENSG00000099795
NDUFB8	Approved symbol	NDUFB8	NADH:ubiquinone oxidoreductase subunit B8	10q24.31	HGNC:7703	4714	ENSG00000166136
NDUFC1	Approved symbol	NDUFC1	NADH:ubiquinone oxidoreductase subunit C1	4q31.1	HGNC:7705	4717	ENSG00000109390
NDUFS1	Approved symbol	NDUFS1	NADH:ubiquinone oxidoreductase core subunit S1	2q33.3	HGNC:7707	4719	ENSG00000023228
NDUFS2	Approved symbol	NDUFS2	NADH:ubiquinone oxidoreductase core subunit S2	1q23.3	HGNC:7708	4720	ENSG00000158864
NDUFS3	Approved symbol	NDUFS3	NADH:ubiquinone oxidoreductase core subunit S3	11p11.2	HGNC:7710	4722	ENSG00000213619
NDUFS6	Approved symbol	NDUFS6	NADH:ubiquinone oxidoreductase subunit S6	5p15.33	HGNC:7713	4726	ENSG00000145494
NDUFS7	Approved symbol	NDUFS7	NADH:ubiquinone oxidoreductase core subunit S7	19p13.3	HGNC:7714	374291	ENSG00000115286
NDUFS8	Approved symbol	NDUFS8	NADH:ubiquinone oxidoreductase core subunit S8	11q13.2	HGNC:7715	4728	ENSG00000110717
NDUFV1	Approved symbol	NDUFV1	NADH:ubiquinone oxidoreductase core subunit V1	11q13.2	HGNC:7716	4723	ENSG00000167792
NDUFV2	Approved symbol	NDUFV2	NADH:ubiquinone oxidoreductase core subunit V2	18p11.22	HGNC:7717	4729	ENSG00000178127
NEMF	Approved symbol	NEMF	nuclear export mediator factor	14q21.3	HGNC:10663	9147	ENSG00000165525
NIPA2	Approved symbol	NIPA2	NIPA magnesium transporter 2	15q11.2	HGNC:17044	81614	ENSG00000140157
NIPSNAP3B	Approved symbol	NIPSNAP3B	nipsnap homolog 3B	9q31.1	HGNC:23641	55335	ENSG00000165028
NKIRAS1	Approved symbol	NKIRAS1	NFKB inhibitor interacting Ras like 1	3p24.2	HGNC:17899	28512	ENSG00000197885
NME6	Approved symbol	NME6	NME/NM23 nucleoside diphosphate kinase 6	3p21.31	HGNC:20567	10201	ENSG00000172113
NREP	Approved symbol	NREP	neuronal regeneration related protein	5q22.1	HGNC:16834	9315	ENSG00000134986
NT5C3B	Approved symbol	NT5C3B	5'-nucleotidase, cytosolic IIIB	17q21.2	HGNC:28300	115024	ENSG00000141698
NUBP1	Approved symbol	NUBP1	nucleotide binding protein 1	16p13.13	HGNC:8041	4682	ENSG00000103274
NUDT13	Approved symbol	NUDT13	nudix hydrolase 13	10q22.2	HGNC:18827	25961	ENSG00000166321
NUDT6	Approved symbol	NUDT6	nudix hydrolase 6	4q28.1	HGNC:8053	11162	ENSG00000170917
NUDT8	Approved symbol	NUDT8	nudix hydrolase 8	11q13.2	HGNC:8055	254552	ENSG00000167799
NUDT9	Approved symbol	NUDT9	nudix hydrolase 9	4q22.1	HGNC:8056	53343	ENSG00000170502
OSER1-AS1	Approved symbol	OSER1-AS1	OSER1 antisense RNA 1 (head to head)	20q13.12	HGNC:48585	100505783	ENSG00000223891
OTUD3	Approved symbol	OTUD3	OTU deubiquitinase 3	1p36.13	HGNC:29038	23252	ENSG00000169914
OXA1L	Approved symbol	OXA1L	OXA1L, mitochondrial inner membrane protein	14q11.2	HGNC:8526	5018	ENSG00000155463
OXNAD1	Approved symbol	OXNAD1	oxidoreductase NAD binding domain containing 1	3p25.1-p24.3	HGNC:25128	92106	ENSG00000154814
P2RY1	Approved symbol	P2RY1	purinergic receptor P2Y1	3q25.2	HGNC:8539	5028	ENSG00000169860
PAQR4	Approved symbol	PAQR4	progestin and adipoQ receptor family member 4	16p13.3	HGNC:26386	124222	ENSG00000162073
PCBD2	Approved symbol	PCBD2	pterin-4 alpha-carbinolamine dehydratase 2	5q31.1	HGNC:24474	84105	ENSG00000132570
PCCA	Approved symbol	PCCA	propionyl-CoA carboxylase alpha subunit	13q32.3	HGNC:8653	5095	ENSG00000175198
PDHA1	Approved symbol	PDHA1	pyruvate dehydrogenase E1 alpha 1 subunit	Xp22.12	HGNC:8806	5160	ENSG00000131828
PDHB	Approved symbol	PDHB	pyruvate dehydrogenase E1 beta subunit	3p14.3	HGNC:8808	5162	ENSG00000168291
PDHX	Approved symbol	PDHX	pyruvate dehydrogenase complex component X	11p13	HGNC:21350	8050	ENSG00000110435
PDSS1	Approved symbol	PDSS1	decaprenyl diphosphate synthase subunit 1	10p12.1	HGNC:17759	23590	ENSG00000148459
PDZD9	Approved symbol	PDZD9	PDZ domain containing 9	16p12.2	HGNC:28740	255762	ENSG00000155714
PET112	Previous symbol	GATB	glutamyl-tRNA amidotransferase subunit B	4q31.3	HGNC:8849	5188	ENSG00000059691
PEX3	Approved symbol	PEX3	peroxisomal biogenesis factor 3	6q24.2	HGNC:8858	8504	ENSG00000034693
PEX7	Approved symbol	PEX7	peroxisomal biogenesis factor 7	6q23.3	HGNC:8860	5191	ENSG00000112357
PFDN1	Approved symbol	PFDN1	prefoldin subunit 1	5q31.3	HGNC:8866	5201	ENSG00000113068
PHB	Approved symbol	PHB	prohibitin	17q21.33	HGNC:8912	5245	ENSG00000167085
PHPT1	Approved symbol	PHPT1	phosphohistidine phosphatase 1	9q34.3	HGNC:30033	29085	ENSG00000054148
PHYH	Approved symbol	PHYH	phytanoyl-CoA 2-hydroxylase	10p13	HGNC:8940	5264	ENSG00000107537
PIGX	Approved symbol	PIGX	phosphatidylinositol glycan anchor biosynthesis class X	3q29	HGNC:26046	54965	ENSG00000163964
PIH1D1	Approved symbol	PIH1D1	PIH1 domain containing 1	19q13.33	HGNC:26075	55011	ENSG00000104872
PIK3C2B	Approved symbol	PIK3C2B	phosphatidylinositol-4-phosphate 3-kinase catalytic subunit type 2 beta	1q32.1	HGNC:8972	5287	ENSG00000133056
PIK3C3	Approved symbol	PIK3C3	phosphatidylinositol 3-kinase catalytic subunit type 3	18q12.3	HGNC:8974	5289	ENSG00000078142
PLRG1	Approved symbol	PLRG1	pleiotropic regulator 1	4q31.3	HGNC:9089	5356	ENSG00000171566
PMF1	Approved symbol	PMF1	polyamine modulated factor 1	1q22	HGNC:9112	11243	ENSG00000160783
PMPCB	Approved symbol	PMPCB	peptidase, mitochondrial processing beta subunit	7q22.1	HGNC:9119	9512	ENSG00000105819
PNKD	Approved symbol	PNKD	paroxysmal nonkinesigenic dyskinesia	2q35	HGNC:9153	25953	ENSG00000127838
PNPLA4	Approved symbol	PNPLA4	patatin like phospholipase domain containing 4	Xp22.31	HGNC:24887	8228	ENSG00000006757
POLR2J2	Approved symbol	POLR2J2	RNA polymerase II subunit J2	7q22.1	HGNC:23208	246721	ENSG00000228049
POLR3K	Approved symbol	POLR3K	RNA polymerase III subunit K	16p13.3	HGNC:14121	51728	ENSG00000161980
PPIE	Approved symbol	PPIE	peptidylprolyl isomerase E	1p34.2	HGNC:9258	10450	ENSG00000084072
PPIF	Approved symbol	PPIF	peptidylprolyl isomerase F	10q22.3	HGNC:9259	10105	ENSG00000108179
PPP1CC	Approved symbol	PPP1CC	protein phosphatase 1 catalytic subunit gamma	12q24.11	HGNC:9283	5501	ENSG00000186298
PPP1R16A	Approved symbol	PPP1R16A	protein phosphatase 1 regulatory subunit 16A	8q24.3	HGNC:14941	84988	ENSG00000160972
PPP1R1A	Approved symbol	PPP1R1A	protein phosphatase 1 regulatory inhibitor subunit 1A	12q13.2	HGNC:9286	5502	ENSG00000135447
PPT2	Approved symbol	PPT2	palmitoyl-protein thioesterase 2	6p21.32	HGNC:9326	9374	ENSG00000221988
PRADC1	Approved symbol	PRADC1	protease associated domain containing 1	2p13.2	HGNC:16047	84279	ENSG00000135617
PRDX3	Approved symbol	PRDX3	peroxiredoxin 3	10q26.11	HGNC:9354	10935	ENSG00000165672
PRDX5	Approved symbol	PRDX5	peroxiredoxin 5	11q13.1	HGNC:9355	25824	ENSG00000126432
PROSC	Previous symbol	PLPBP	pyridoxal phosphate binding protein	8p11.23	HGNC:9457	11212	ENSG00000147471
PSPH	Approved symbol	PSPH	phosphoserine phosphatase	7p11.2	HGNC:9577	5723	ENSG00000146733
PTCD2	Approved symbol	PTCD2	pentatricopeptide repeat domain 2	5q13.2	HGNC:25734	79810	ENSG00000049883
PTCD3	Approved symbol	PTCD3	pentatricopeptide repeat domain 3	2p11.2	HGNC:24717	55037	ENSG00000132300
PTER	Approved symbol	PTER	phosphotriesterase related	10p13	HGNC:9590	9317	ENSG00000165983
PTGR2	Approved symbol	PTGR2	prostaglandin reductase 2	14q24.3	HGNC:20149	145482	ENSG00000140043
PTPMT1	Approved symbol	PTPMT1	protein tyrosine phosphatase, mitochondrial 1	11p11.2	HGNC:26965	114971	ENSG00000110536
PTPN20B	Previous symbol	PTPN20	protein tyrosine phosphatase, non-receptor type 20	10q11.22	HGNC:23423	26095	ENSG00000204179
PTPN4	Approved symbol	PTPN4	protein tyrosine phosphatase, non-receptor type 4	2q14.2	HGNC:9656	5775	ENSG00000088179
PXMP2	Approved symbol	PXMP2	peroxisomal membrane protein 2	12q24.33	HGNC:9716	5827	ENSG00000176894
QRSL1	Approved symbol	QRSL1	glutaminyl-tRNA synthase (glutamine-hydrolyzing)-like 1	6q21	HGNC:21020	55278	ENSG00000130348
RAB4A	Approved symbol	RAB4A	RAB4A, member RAS oncogene family	1q42.13	HGNC:9781	5867	ENSG00000168118
RAD1	Approved symbol	RAD1	RAD1 checkpoint DNA exonuclease	5p13.2	HGNC:9806	5810	ENSG00000113456
RAD17	Approved symbol	RAD17	RAD17 checkpoint clamp loader component	5q13.2	HGNC:9807	5884	ENSG00000152942
RALGPS1	Approved symbol	RALGPS1	Ral GEF with PH domain and SH3 binding motif 1	9q33.3	HGNC:16851	9649	ENSG00000136828
RAP2A	Approved symbol	RAP2A	RAP2A, member of RAS oncogene family	13q32.1	HGNC:9861	5911	ENSG00000125249
RASSF8-AS1	Approved symbol	RASSF8-AS1	RASSF8 antisense RNA 1	12p12.1	HGNC:48637	100506451	ENSG00000246695
RBKS	Approved symbol	RBKS	ribokinase	2p23.2	HGNC:30325	64080	ENSG00000171174
RBM17	Approved symbol	RBM17	RNA binding motif protein 17	10p15.1	HGNC:16944	84991	ENSG00000134453
RBM18	Approved symbol	RBM18	RNA binding motif protein 18	9q33.2	HGNC:28413	92400	ENSG00000119446
RCCD1	Approved symbol	RCCD1	RCC1 domain containing 1	15q26.1	HGNC:30457	91433	ENSG00000166965
RCN2	Approved symbol	RCN2	reticulocalbin 2	15q24.3	HGNC:9935	5955	ENSG00000117906
RGN	Approved symbol	RGN	regucalcin	Xp11.3	HGNC:9989	9104	ENSG00000130988
RHOU	Approved symbol	RHOU	ras homolog family member U	1q42.13	HGNC:17794	58480	ENSG00000116574
RMND1	Approved symbol	RMND1	required for meiotic nuclear division 1 homolog	6q25.1	HGNC:21176	55005	ENSG00000155906
RNF130	Approved symbol	RNF130	ring finger protein 130	5q35.3	HGNC:18280	55819	ENSG00000113269
RNF14	Approved symbol	RNF14	ring finger protein 14	5q31.3	HGNC:10058	9604	ENSG00000013561
RNF141	Approved symbol	RNF141	ring finger protein 141	11p15.3	HGNC:21159	50862	ENSG00000110315
RNF144A	Approved symbol	RNF144A	ring finger protein 144A	2p25.1	HGNC:20457	9781	ENSG00000151692
RNF216P1	Approved symbol	RNF216P1	ring finger protein 216 pseudogene 1	7p22.1	HGNC:33610	441191	ENSG00000196204
RNF5	Approved symbol	RNF5	ring finger protein 5	6p21.32	HGNC:10068	6048	ENSG00000204308
RNLS	Approved symbol	RNLS	renalase, FAD dependent amine oxidase	10q23.31	HGNC:25641	55328	ENSG00000184719
RP11-184I16.4	Unmatched
RP11-85F14.5	Unmatched
RP11-96H19.1	Unmatched
RP5-1021I20.1	Unmatched
RPP25L	Approved symbol	RPP25L	ribonuclease P/MRP subunit p25 like	9p13.3	HGNC:19909	138716	ENSG00000164967
RPS19BP1	Approved symbol	RPS19BP1	ribosomal protein S19 binding protein 1	22q13.1	HGNC:28749	91582	ENSG00000187051
RPS6KC1	Approved symbol	RPS6KC1	ribosomal protein S6 kinase C1	1q32.3	HGNC:10439	26750	ENSG00000136643
RRP36	Approved symbol	RRP36	ribosomal RNA processing 36	6p21.1	HGNC:21374	88745	ENSG00000124541
RSBN1L-AS1	Previous symbol	APTR	Alu-mediated CDKN1A/p21 transcriptional regulator (non-protein coding)	7q11.23	HGNC:44173	100505854	ENSG00000214293
RTN4IP1	Approved symbol	RTN4IP1	reticulon 4 interacting protein 1	6q21	HGNC:18647	84816	ENSG00000130347
RWDD2B	Approved symbol	RWDD2B	RWD domain containing 2B	21q21.3	HGNC:1302	10069	ENSG00000156253
SAP18	Approved symbol	SAP18	Sin3A associated protein 18	13q12.11	HGNC:10530	10284	ENSG00000150459
SCP2	Approved symbol	SCP2	sterol carrier protein 2	1p32.3	HGNC:10606	6342	ENSG00000116171
SDHAF2	Approved symbol	SDHAF2	succinate dehydrogenase complex assembly factor 2	11q12.2	HGNC:26034	54949	ENSG00000167985
SDHAP1	Approved symbol	SDHAP1	succinate dehydrogenase complex flavoprotein subunit A pseudogene 1	3q29	HGNC:32455	255812	ENSG00000185485
SDHAP2	Approved symbol	SDHAP2	succinate dehydrogenase complex flavoprotein subunit A pseudogene 2	3q29	HGNC:27408	727956	ENSG00000215837
SDHB	Approved symbol	SDHB	succinate dehydrogenase complex iron sulfur subunit B	1p36.13	HGNC:10681	6390	ENSG00000117118
SDHC	Approved symbol	SDHC	succinate dehydrogenase complex subunit C	1q23.3	HGNC:10682	6391	ENSG00000143252
SELENBP1	Approved symbol	SELENBP1	selenium binding protein 1	1q21.3	HGNC:10719	8991	ENSG00000143416
SERAC1	Approved symbol	SERAC1	serine active site containing 1	6q25.3	HGNC:21061	84947	ENSG00000122335
SERPINA5	Approved symbol	SERPINA5	serpin family A member 5	14q32.13	HGNC:8723	5104	ENSG00000188488
SH3BGR	Approved symbol	SH3BGR	SH3 domain binding glutamate rich protein	21q22.2	HGNC:10822	6450	ENSG00000185437
SHF	Approved symbol	SHF	Src homology 2 domain containing F	15q21.1	HGNC:25116	90525	ENSG00000138606
SHMT1	Approved symbol	SHMT1	serine hydroxymethyltransferase 1	17p11.2	HGNC:10850	6470	ENSG00000176974
SIRT5	Approved symbol	SIRT5	sirtuin 5	6p23	HGNC:14933	23408	ENSG00000124523
SIVA1	Approved symbol	SIVA1	SIVA1 apoptosis inducing factor	14q32.33	HGNC:17712	10572	ENSG00000184990
SLC25A11	Approved symbol	SLC25A11	solute carrier family 25 member 11	17p13.2	HGNC:10981	8402	ENSG00000108528
SLC25A12	Approved symbol	SLC25A12	solute carrier family 25 member 12	2q31.1	HGNC:10982	8604	ENSG00000115840
SLC25A19	Approved symbol	SLC25A19	solute carrier family 25 member 19	17q25.1	HGNC:14409	60386	ENSG00000125454
SLC25A3	Approved symbol	SLC25A3	solute carrier family 25 member 3	12q23.1	HGNC:10989	5250	ENSG00000075415
SLC25A30	Approved symbol	SLC25A30	solute carrier family 25 member 30	13q14.13	HGNC:27371	253512	ENSG00000174032
SLC25A4	Approved symbol	SLC25A4	solute carrier family 25 member 4	4q35.1	HGNC:10990	291	ENSG00000151729
SLC25A5-AS1	Approved symbol	SLC25A5-AS1	SLC25A5 antisense RNA 1	Xq24	HGNC:43438	100303728	ENSG00000224281
SLC30A9	Approved symbol	SLC30A9	solute carrier family 30 member 9	4p13	HGNC:1329	10463	ENSG00000014824
SLC38A2	Approved symbol	SLC38A2	solute carrier family 38 member 2	12q13.11	HGNC:13448	54407	ENSG00000134294
SMG8	Approved symbol	SMG8	SMG8, nonsense mediated mRNA decay factor	17q23.2	HGNC:25551	55181	ENSG00000167447
SMIM20	Approved symbol	SMIM20	small integral membrane protein 20	4p15.2	HGNC:37260	389203	ENSG00000250317
SMIM4	Approved symbol	SMIM4	small integral membrane protein 4	3p21.1	HGNC:37257	440957	ENSG00000168273
SMIM8	Approved symbol	SMIM8	small integral membrane protein 8	6q15	HGNC:21401	57150	ENSG00000111850
SMPX	Approved symbol	SMPX	small muscle protein, X-linked	Xp22.12	HGNC:11122	23676	ENSG00000091482
SNAPC3	Approved symbol	SNAPC3	small nuclear RNA activating complex polypeptide 3	9p22.3	HGNC:11136	6619	ENSG00000164975
SNAPC5	Approved symbol	SNAPC5	small nuclear RNA activating complex polypeptide 5	15q22.31	HGNC:15484	10302	ENSG00000174446
SNF8	Approved symbol	SNF8	SNF8, ESCRT-II complex subunit	17q21.32	HGNC:17028	11267	ENSG00000159210
SNRNP25	Approved symbol	SNRNP25	small nuclear ribonucleoprotein U11/U12 subunit 25	16p13.3	HGNC:14161	79622	ENSG00000161981
SNUPN	Approved symbol	SNUPN	snurportin 1	15q24.2	HGNC:14245	10073	ENSG00000169371
SNX24	Approved symbol	SNX24	sorting nexin 24	5q23.2	HGNC:21533	28966	ENSG00000064652
SNX3	Approved symbol	SNX3	sorting nexin 3	6q21	HGNC:11174	8724	ENSG00000112335
SOX9-AS1	Approved symbol	SOX9-AS1	SOX9 antisense RNA 1	17q24.3	HGNC:49321	400618	ENSG00000234899
SPAG7	Approved symbol	SPAG7	sperm associated antigen 7	17p13.2	HGNC:11216	9552	ENSG00000091640
SPRN	Approved symbol	SPRN	shadow of prion protein	10q26.3	HGNC:16871	503542	ENSG00000203772
SPRYD4	Approved symbol	SPRYD4	SPRY domain containing 4	12q13.3	HGNC:27468	283377	ENSG00000176422
SPRYD7	Approved symbol	SPRYD7	SPRY domain containing 7	13q14.2	HGNC:14297	57213	ENSG00000123178
STAG3L4	Approved symbol	STAG3L4	stromal antigen 3-like 4 (pseudogene)	7q11.21	HGNC:33887	64940	ENSG00000106610
STOML2	Approved symbol	STOML2	stomatin like 2	9p13.3	HGNC:14559	30968	ENSG00000165283
STRADB	Approved symbol	STRADB	STE20-related kinase adaptor beta	2q33.1	HGNC:13205	55437	ENSG00000082146
STYX	Approved symbol	STYX	serine/threonine/tyrosine interacting protein	14q22.1	HGNC:11447	6815	ENSG00000198252
SUCLA2	Approved symbol	SUCLA2	succinate-CoA ligase ADP-forming beta subunit	13q14.2	HGNC:11448	8803	ENSG00000136143
SUCLG1	Approved symbol	SUCLG1	succinate-CoA ligase alpha subunit	2p11.2	HGNC:11449	8802	ENSG00000163541
SUCLG2	Approved symbol	SUCLG2	succinate-CoA ligase GDP-forming beta subunit	3p14.1	HGNC:11450	8801	ENSG00000172340
SUGCT	Approved symbol	SUGCT	succinyl-CoA:glutarate-CoA transferase	7p14.1	HGNC:16001	79783	ENSG00000175600
SUPT4H1	Approved symbol	SUPT4H1	SPT4 homolog, DSIF elongation factor subunit	17q22	HGNC:11467	6827	ENSG00000213246
SUPV3L1	Approved symbol	SUPV3L1	Suv3 like RNA helicase	10q22.1	HGNC:11471	6832	ENSG00000156502
SURF1	Approved symbol	SURF1	SURF1, cytochrome c oxidase assembly factor	9q34.2	HGNC:11474	6834	ENSG00000148290
SYNGR1	Approved symbol	SYNGR1	synaptogyrin 1	22q13.1	HGNC:11498	9145	ENSG00000100321
TACO1	Approved symbol	TACO1	translational activator of cytochrome c oxidase I	17q23.3	HGNC:24316	51204	ENSG00000136463
TAF13	Approved symbol	TAF13	TATA-box binding protein associated factor 13	1p13.3	HGNC:11546	6884	ENSG00000197780
TARS	Approved symbol	TARS	threonyl-tRNA synthetase	5p13.3	HGNC:11572	6897	ENSG00000113407
TAZ	Approved symbol	TAZ	tafazzin	Xq28	HGNC:11577	6901	ENSG00000102125
TBC1D7	Approved symbol	TBC1D7	TBC1 domain family member 7	6p24.1	HGNC:21066	51256	ENSG00000145979
TBRG4	Approved symbol	TBRG4	transforming growth factor beta regulator 4	7p13	HGNC:17443	9238	ENSG00000136270
TFB2M	Approved symbol	TFB2M	transcription factor B2, mitochondrial	1q44	HGNC:18559	64216	ENSG00000162851
TFRC	Approved symbol	TFRC	transferrin receptor	3q29	HGNC:11763	7037	ENSG00000072274
TIMM13	Approved symbol	TIMM13	translocase of inner mitochondrial membrane 13	19p13.3	HGNC:11816	26517	ENSG00000099800
TIMM17A	Approved symbol	TIMM17A	translocase of inner mitochondrial membrane 17A	1q32.1	HGNC:17315	10440	ENSG00000134375
TIMM21	Approved symbol	TIMM21	translocase of inner mitochondrial membrane 21	18q22.3	HGNC:25010	29090	ENSG00000075336
TIMMDC1	Approved symbol	TIMMDC1	translocase of inner mitochondrial membrane domain containing 1	3q13.33	HGNC:1321	51300	ENSG00000113845
TMEM110	Previous symbol	STIMATE	STIM activating enhancer	3p21.1	HGNC:30526	375346	ENSG00000213533
TMEM150A	Approved symbol	TMEM150A	transmembrane protein 150A	2p11.2	HGNC:24677	129303	ENSG00000168890
TMEM185A	Approved symbol	TMEM185A	transmembrane protein 185A	Xq28	HGNC:17125	84548	ENSG00000269556
TMEM230	Approved symbol	TMEM230	transmembrane protein 230	20p13-p12.3	HGNC:15876	29058	ENSG00000089063
TMEM242	Approved symbol	TMEM242	transmembrane protein 242	6q25.3	HGNC:17206	729515	ENSG00000215712
TMEM47	Approved symbol	TMEM47	transmembrane protein 47	Xp21.1	HGNC:18515	83604	ENSG00000147027
TMTC4	Approved symbol	TMTC4	transmembrane and tetratricopeptide repeat containing 4	13q32.3	HGNC:25904	84899	ENSG00000125247
TOMM40L	Approved symbol	TOMM40L	translocase of outer mitochondrial membrane 40 like	1q23.3	HGNC:25756	84134	ENSG00000158882
TPD52L1	Approved symbol	TPD52L1	tumor protein D52 like 1	6q22-q23	HGNC:12006	7164	ENSG00000111907
TPMT	Approved symbol	TPMT	thiopurine S-methyltransferase	6p22.3	HGNC:12014	7172	ENSG00000137364
TRAPPC11	Approved symbol	TRAPPC11	trafficking protein particle complex 11	4q35.1	HGNC:25751	60684	ENSG00000168538
TRAPPC5	Approved symbol	TRAPPC5	trafficking protein particle complex 5	19p13.3	HGNC:23067	126003	ENSG00000181029
TRIM16	Approved symbol	TRIM16	tripartite motif containing 16	17p12	HGNC:17241	10626	ENSG00000221926
TRIM52-AS1	Approved symbol	TRIM52-AS1	TRIM52 antisense RNA 1 (head to head)	5q35.3	HGNC:49006	100507602	ENSG00000248275
TRND	Synonyms	MT-TD	mitochondrially encoded tRNA aspartic acid	mitochondria	HGNC:7478	4555	ENSG00000210154
TRNG	Synonyms	MT-TG	mitochondrially encoded tRNA glycine	mitochondria	HGNC:7486	4563	ENSG00000210164
TRNI	Synonyms	MT-TI	mitochondrially encoded tRNA isoleucine	mitochondria	HGNC:7488	4565	ENSG00000210100
TRNK	Synonyms	MT-TK	mitochondrially encoded tRNA lysine	mitochondria	HGNC:7489	4566	ENSG00000210156
TRNL1	Synonyms	MT-TL1	mitochondrially encoded tRNA leucine 1 (UUA/G)	mitochondria	HGNC:7490	4567	ENSG00000209082
TRNM	Synonyms	MT-TM	mitochondrially encoded tRNA methionine	mitochondria	HGNC:7492	4569	ENSG00000210112
TRNP	Synonyms	MT-TP	mitochondrially encoded tRNA proline	mitochondria	HGNC:7494	4571	ENSG00000210196
TRNR	Synonyms	MT-TR	mitochondrially encoded tRNA arginine	mitochondria	HGNC:7496	4573	ENSG00000210174
TRNS1	Synonyms	MT-TS1	mitochondrially encoded tRNA serine 1 (UCN)	mitochondria	HGNC:7497	4574	ENSG00000210151
TRNV	Synonyms	MT-TV	mitochondrially encoded tRNA valine	mitochondria	HGNC:7500	4577	ENSG00000210077
TRNW	Synonyms	MT-TW	mitochondrially encoded tRNA tryptophan	mitochondria	HGNC:7501	4578	ENSG00000210117
TRNY	Synonyms	MT-TY	mitochondrially encoded tRNA tyrosine	mitochondria	HGNC:7502	4579	ENSG00000210144
TRPT1	Approved symbol	TRPT1	tRNA phosphotransferase 1	11q13.1	HGNC:20316	83707	ENSG00000149743
TSFM	Approved symbol	TSFM	Ts translation elongation factor, mitochondrial	12q14.1	HGNC:12367	10102	ENSG00000123297
TTC5	Approved symbol	TTC5	tetratricopeptide repeat domain 5	14q11.2	HGNC:19274	91875	ENSG00000136319
TXN2	Approved symbol	TXN2	thioredoxin 2	22q12.3	HGNC:17772	25828	ENSG00000100348
UAP1	Approved symbol	UAP1	UDP-N-acetylglucosamine pyrophosphorylase 1	1q23.3	HGNC:12457	6675	ENSG00000117143
UBA5	Approved symbol	UBA5	ubiquitin like modifier activating enzyme 5	3q22.1	HGNC:23230	79876	ENSG00000081307
UBB	Approved symbol	UBB	ubiquitin B	17p11.2	HGNC:12463	7314	ENSG00000170315
UBR2	Approved symbol	UBR2	ubiquitin protein ligase E3 component n-recognin 2	6p21.1	HGNC:21289	23304	ENSG00000024048
UCKL1	Approved symbol	UCKL1	uridine-cytidine kinase 1 like 1	20q13.33	HGNC:15938	54963	ENSG00000198276
UGP2	Approved symbol	UGP2	UDP-glucose pyrophosphorylase 2	2p15	HGNC:12527	7360	ENSG00000169764
UQCC1	Approved symbol	UQCC1	ubiquinol-cytochrome c reductase complex assembly factor 1	20q11.22	HGNC:15891	55245	ENSG00000101019
UQCR10	Approved symbol	UQCR10	ubiquinol-cytochrome c reductase, complex III subunit X	22q12.2	HGNC:30863	29796	ENSG00000184076
UQCRC1	Approved symbol	UQCRC1	ubiquinol-cytochrome c reductase core protein 1	3p21.31	HGNC:12585	7384	ENSG00000010256
UQCRC2	Approved symbol	UQCRC2	ubiquinol-cytochrome c reductase core protein 2	16p12.2	HGNC:12586	7385	ENSG00000140740
UQCRFS1	Approved symbol	UQCRFS1	ubiquinol-cytochrome c reductase, Rieske iron-sulfur polypeptide 1	19q12	HGNC:12587	7386	ENSG00000169021
UROD	Approved symbol	UROD	uroporphyrinogen decarboxylase	1p34.1	HGNC:12591	7389	ENSG00000126088
USP4	Approved symbol	USP4	ubiquitin specific peptidase 4	3p21.31	HGNC:12627	7375	ENSG00000114316
VAMP3	Approved symbol	VAMP3	vesicle associated membrane protein 3	1p36.23	HGNC:12644	9341	ENSG00000049245
VDAC1	Approved symbol	VDAC1	voltage dependent anion channel 1	5q31.1	HGNC:12669	7416	ENSG00000213585
VDAC2	Approved symbol	VDAC2	voltage dependent anion channel 2	10q22.2	HGNC:12672	7417	ENSG00000165637
VDAC3	Approved symbol	VDAC3	voltage dependent anion channel 3	8p11.21	HGNC:12674	7419	ENSG00000078668
VEGFB	Approved symbol	VEGFB	vascular endothelial growth factor B	11q13.1	HGNC:12681	7423	ENSG00000173511
VIMP	Previous symbol	SELENOS	selenoprotein S	15q26.3	HGNC:30396	55829	ENSG00000131871
VTI1B	Approved symbol	VTI1B	vesicle transport through interaction with t-SNAREs 1B	14q24.1	HGNC:17793	10490	ENSG00000100568
WBP4	Approved symbol	WBP4	WW domain binding protein 4	13q14.11	HGNC:12739	11193	ENSG00000120688
WDFY3-AS2	Approved symbol	WDFY3-AS2	WDFY3 antisense RNA 2	4q21.23	HGNC:21603	404201	ENSG00000180769
WDR45	Approved symbol	WDR45	WD repeat domain 45	Xp11.23	HGNC:28912	11152	ENSG00000196998
WDR47	Approved symbol	WDR47	WD repeat domain 47	1p13.3	HGNC:29141	22911	ENSG00000085433
WDR61	Approved symbol	WDR61	WD repeat domain 61	15q25.1	HGNC:30300	80349	ENSG00000140395
WDR83OS	Approved symbol	WDR83OS	WD repeat domain 83 opposite strand	19p13.13	HGNC:30203	51398	ENSG00000105583
WDR92	Approved symbol	WDR92	WD repeat domain 92	2p14	HGNC:25176	116143	ENSG00000243667
WDYHV1	Approved symbol	WDYHV1	WDYHV motif containing 1	8q24.13	HGNC:25490	55093	ENSG00000156795
XPA	Approved symbol	XPA	XPA, DNA damage recognition and repair factor	9q22.33	HGNC:12814	7507	ENSG00000136936
ZC3H8	Approved symbol	ZC3H8	zinc finger CCCH-type containing 8	2q14.1	HGNC:30941	84524	ENSG00000144161
ZCCHC3	Approved symbol	ZCCHC3	zinc finger CCHC-type containing 3	20p13	HGNC:16230	85364	ENSG00000247315
ZCWPW2	Approved symbol	ZCWPW2	zinc finger CW-type and PWWP domain containing 2	3p24.1	HGNC:23574	152098	ENSG00000206559
ZDHHC16	Approved symbol	ZDHHC16	zinc finger DHHC-type containing 16	10q24.1	HGNC:20714	84287	ENSG00000171307
ZDHHC4	Approved symbol	ZDHHC4	zinc finger DHHC-type containing 4	7p22.1	HGNC:18471	55146	ENSG00000136247
ZFHX4-AS1	Approved symbol	ZFHX4-AS1	ZFHX4 antisense RNA 1	8q21.13	HGNC:44165	100192378	ENSG00000253661
ZMAT5	Approved symbol	ZMAT5	zinc finger matrin-type 5	22q12.2	HGNC:28046	55954	ENSG00000100319
ZNF252P	Approved symbol	ZNF252P	zinc finger protein 252, pseudogene	8q24.3	HGNC:13046	286101	ENSG00000196922
ZNF271	Previous symbol	ZNF271P	zinc finger protein 271, pseudogene	18q12.2	HGNC:13065	10778	ENSG00000257267
ZNF511	Approved symbol	ZNF511	zinc finger protein 511	10q26.3	HGNC:28445	118472	ENSG00000198546
ZNF808	Approved symbol	ZNF808	zinc finger protein 808	19q13.41	HGNC:33230	388558	ENSG00000198482

## Sheet: M10
HGNC gene symbol	Gene symbol annotation status	Corresponding approved gene symbol	Corresponding approved name	Location	Associated HGNC ID	Associated Entrez ID	Associated Ensembl ID
ABCA8	Approved symbol	ABCA8	ATP binding cassette subfamily A member 8	17q24.2	HGNC:38	10351	ENSG00000141338
ABHD14B	Approved symbol	ABHD14B	abhydrolase domain containing 14B	3p21.2	HGNC:28235	84836	ENSG00000114779
ABI3	Approved symbol	ABI3	ABI family member 3	17q21.32	HGNC:29859	51225	ENSG00000108798
ACAT2	Approved symbol	ACAT2	acetyl-CoA acetyltransferase 2	6q25.3	HGNC:94	39	ENSG00000120437
ACCS	Approved symbol	ACCS	1-aminocyclopropane-1-carboxylate synthase homolog (inactive)	11p11.2	HGNC:23989	84680	ENSG00000110455
ACER3	Approved symbol	ACER3	alkaline ceramidase 3	11q13.5	HGNC:16066	55331	ENSG00000078124
ADAM19	Approved symbol	ADAM19	ADAM metallopeptidase domain 19	5q33.3	HGNC:197	8728	ENSG00000135074
ADAM33	Approved symbol	ADAM33	ADAM metallopeptidase domain 33	20p13	HGNC:15478	80332	ENSG00000149451
ADAMTS10	Approved symbol	ADAMTS10	ADAM metallopeptidase with thrombospondin type 1 motif 10	19p13.2	HGNC:13201	81794	ENSG00000142303
ADCY3	Approved symbol	ADCY3	adenylate cyclase 3	2p23.3	HGNC:234	109	ENSG00000138031
ADCY5	Approved symbol	ADCY5	adenylate cyclase 5	3q21.1	HGNC:236	111	ENSG00000173175
ADCY7	Approved symbol	ADCY7	adenylate cyclase 7	16q12.1	HGNC:238	113	ENSG00000121281
ADD3	Approved symbol	ADD3	adducin 3	10q25.1-q25.2	HGNC:245	120	ENSG00000148700
ADH1C	Approved symbol	ADH1C	alcohol dehydrogenase 1C (class I), gamma polypeptide	4q23	HGNC:251	126	ENSG00000248144
ADIRF	Approved symbol	ADIRF	adipogenesis regulatory factor	10q23.2	HGNC:24043	10974	ENSG00000148671
ADPGK	Approved symbol	ADPGK	ADP dependent glucokinase	15q24.1	HGNC:25250	83440	ENSG00000159322
AFAP1L2	Approved symbol	AFAP1L2	actin filament associated protein 1 like 2	10q25.3	HGNC:25901	84632	ENSG00000169129
AGTR1	Approved symbol	AGTR1	angiotensin II receptor type 1	3q24	HGNC:336	185	ENSG00000144891
AIM1	Previous symbol	CRYBG1	crystallin beta-gamma domain containing 1	6q21	HGNC:356	202	ENSG00000112297
AKAP11	Approved symbol	AKAP11	A-kinase anchoring protein 11	13q14.11	HGNC:369	11215	ENSG00000023516
ALDH1L2	Approved symbol	ALDH1L2	aldehyde dehydrogenase 1 family member L2	12q23.3	HGNC:26777	160428	ENSG00000136010
ALG13	Approved symbol	ALG13	ALG13, UDP-N-acetylglucosaminyltransferase subunit	Xq23	HGNC:30881	79868	ENSG00000101901
ALG8	Approved symbol	ALG8	ALG8, alpha-1,3-glucosyltransferase	11q14.1	HGNC:23161	79053	ENSG00000159063
ALMS1	Approved symbol	ALMS1	ALMS1, centrosome and basal body associated protein	2p13.1	HGNC:428	7840	ENSG00000116127
AMMECR1	Approved symbol	AMMECR1	Alport syndrome, mental retardation, midface hypoplasia and elliptocytosis chromosomal region gene 1	Xq23	HGNC:467	9949	ENSG00000101935
ANKHD1	Approved symbol	ANKHD1	ankyrin repeat and KH domain containing 1	5q31.3	HGNC:24714	54882	ENSG00000131503
ANKRA2	Approved symbol	ANKRA2	ankyrin repeat family A member 2	5q13.2	HGNC:13208	57763	ENSG00000164331
ANKRD29	Approved symbol	ANKRD29	ankyrin repeat domain 29	18q11.2	HGNC:27110	147463	ENSG00000154065
ANKS3	Approved symbol	ANKS3	ankyrin repeat and sterile alpha motif domain containing 3	16p13.3	HGNC:29422	124401	ENSG00000168096
ANTXR2	Approved symbol	ANTXR2	anthrax toxin receptor 2	4q21.21	HGNC:21732	118429	ENSG00000163297
ANXA4	Approved symbol	ANXA4	annexin A4	2p13.3	HGNC:542	307	ENSG00000196975
AP1S1	Approved symbol	AP1S1	adaptor related protein complex 1 sigma 1 subunit	7q22.1	HGNC:559	1174	ENSG00000106367
AP3S1	Approved symbol	AP3S1	adaptor related protein complex 3 sigma 1 subunit	5q22.3-q23.1	HGNC:2013	1176	ENSG00000177879
APAF1	Approved symbol	APAF1	apoptotic peptidase activating factor 1	12q23.1	HGNC:576	317	ENSG00000120868
APCDD1	Approved symbol	APCDD1	APC down-regulated 1	18p11.22	HGNC:15718	147495	ENSG00000154856
APOE	Approved symbol	APOE	apolipoprotein E	19q13.32	HGNC:613	348	ENSG00000130203
APOL6	Approved symbol	APOL6	apolipoprotein L6	22q12.3	HGNC:14870	80830	ENSG00000221963
APP	Approved symbol	APP	amyloid beta precursor protein	21q21.3	HGNC:620	351	ENSG00000142192
ARHGAP33	Approved symbol	ARHGAP33	Rho GTPase activating protein 33	19q13.12	HGNC:23085	115703	ENSG00000004777
ARL16	Approved symbol	ARL16	ADP ribosylation factor like GTPase 16	17q25.3	HGNC:27902	339231	ENSG00000214087
ARMCX2	Approved symbol	ARMCX2	armadillo repeat containing, X-linked 2	Xq22.1	HGNC:16869	9823	ENSG00000184867
ARPC1A	Approved symbol	ARPC1A	actin related protein 2/3 complex subunit 1A	7q22.1	HGNC:703	10552	ENSG00000241685
ARRB1	Approved symbol	ARRB1	arrestin beta 1	11q13.4	HGNC:711	408	ENSG00000137486
ARSD	Approved symbol	ARSD	arylsulfatase D	Xp22.33	HGNC:717	414	ENSG00000006756
ASPN	Approved symbol	ASPN	asporin	9q22.31	HGNC:14872	54829	ENSG00000106819
ATHL1	Previous symbol	PGGHG	protein-glucosylgalactosylhydroxylysine glucosidase	11p15.5	HGNC:26210	80162	ENSG00000142102
ATOH8	Approved symbol	ATOH8	atonal bHLH transcription factor 8	2p11.2	HGNC:24126	84913	ENSG00000168874
ATP2A3	Approved symbol	ATP2A3	ATPase sarcoplasmic/endoplasmic reticulum Ca2+ transporting 3	17p13.2	HGNC:813	489	ENSG00000074370
ATP6AP2	Approved symbol	ATP6AP2	ATPase H+ transporting accessory protein 2	Xp11.4	HGNC:18305	10159	ENSG00000182220
AVL9	Approved symbol	AVL9	AVL9 cell migration associated	7p14.3	HGNC:28994	23080	ENSG00000105778
B3GALTL	Previous symbol	B3GLCT	beta 3-glucosyltransferase	13q12.3	HGNC:20207	145173	ENSG00000187676
BAIAP2	Approved symbol	BAIAP2	BAI1 associated protein 2	17q25.3	HGNC:947	10458	ENSG00000175866
BBS1	Approved symbol	BBS1	Bardet-Biedl syndrome 1	11q13.2	HGNC:966	582	ENSG00000174483
BBS7	Approved symbol	BBS7	Bardet-Biedl syndrome 7	4q27	HGNC:18758	55212	ENSG00000138686
BCAM	Approved symbol	BCAM	basal cell adhesion molecule (Lutheran blood group)	19q13.32	HGNC:6722	4059	ENSG00000187244
BCAP31	Approved symbol	BCAP31	B cell receptor associated protein 31	Xq28	HGNC:16695	10134	ENSG00000185825
BCORL1	Approved symbol	BCORL1	BCL6 corepressor like 1	Xq26.1	HGNC:25657	63035	ENSG00000085185
BEX4	Approved symbol	BEX4	brain expressed X-linked 4	Xq22.1	HGNC:25475	56271	ENSG00000102409
BLOC1S3	Approved symbol	BLOC1S3	biogenesis of lysosomal organelles complex 1 subunit 3	19q13.32	HGNC:20914	388552	ENSG00000189114
BMP4	Approved symbol	BMP4	bone morphogenetic protein 4	14q22.2	HGNC:1071	652	ENSG00000125378
BNC2	Approved symbol	BNC2	basonuclin 2	9p22.3-p22.2	HGNC:30988	54796	ENSG00000173068
BNIP3L	Approved symbol	BNIP3L	BCL2 interacting protein 3 like	8p21.2	HGNC:1085	665	ENSG00000104765
BOC	Approved symbol	BOC	BOC cell adhesion associated, oncogene regulated	3q13.2	HGNC:17173	91653	ENSG00000144857
BOLA3-AS1	Approved symbol	BOLA3-AS1	BOLA3 antisense RNA 1 (head to head)	2p13.1	HGNC:42922	100507171	ENSG00000225439
BRCA1	Approved symbol	BRCA1	BRCA1, DNA repair associated	17q21.31	HGNC:1100	672	ENSG00000012048
C15orf39	Approved symbol	C15orf39	chromosome 15 open reading frame 39	15q24.2	HGNC:24497	56905	ENSG00000167173
C19orf66	Approved symbol	C19orf66	chromosome 19 open reading frame 66	19p13.2	HGNC:25649	55337	ENSG00000130813
C1orf159	Approved symbol	C1orf159	chromosome 1 open reading frame 159	1p36.33	HGNC:26062	54991	ENSG00000131591
C1QTNF1	Approved symbol	C1QTNF1	C1q and TNF related 1	17q25.3	HGNC:14324	114897	ENSG00000173918
C2orf40	Approved symbol	C2orf40	chromosome 2 open reading frame 40	2q12.2	HGNC:24642	84417	ENSG00000119147
C5orf45	Previous symbol	MRNIP	MRN complex interacting protein	5q35.3	HGNC:30817	51149	ENSG00000161010
C5orf63	Approved symbol	C5orf63	chromosome 5 open reading frame 63	5q23.2	HGNC:40051	401207	ENSG00000164241
C7orf13	Previous symbol	LINC01006	long intergenic non-protein coding RNA 1006	7q36.3	HGNC:48971	100506380	ENSG00000182648
CAB39L	Approved symbol	CAB39L	calcium binding protein 39 like	13q14.2	HGNC:20290	81617	ENSG00000102547
CACNB3	Approved symbol	CACNB3	calcium voltage-gated channel auxiliary subunit beta 3	12q13.12	HGNC:1403	784	ENSG00000167535
CALCRL	Approved symbol	CALCRL	calcitonin receptor like receptor	2q32.1	HGNC:16709	10203	ENSG00000064989
CAMK1	Approved symbol	CAMK1	calcium/calmodulin dependent protein kinase I	3p25.3	HGNC:1459	8536	ENSG00000134072
CAMKK2	Approved symbol	CAMKK2	calcium/calmodulin dependent protein kinase kinase 2	12q24.31	HGNC:1470	10645	ENSG00000110931
CAPN5	Approved symbol	CAPN5	calpain 5	11q13.5	HGNC:1482	726	ENSG00000149260
CAPN6	Approved symbol	CAPN6	calpain 6	Xq23	HGNC:1483	827	ENSG00000077274
CARHSP1	Approved symbol	CARHSP1	calcium regulated heat stable protein 1	16p13.2	HGNC:17150	23589	ENSG00000153048
CASP8	Approved symbol	CASP8	caspase 8	2q33.1	HGNC:1509	841	ENSG00000064012
CBR3	Approved symbol	CBR3	carbonyl reductase 3	21q22.12	HGNC:1549	874	ENSG00000159231
CCDC104	Previous symbol	CFAP36	cilia and flagella associated protein 36	2p16.1	HGNC:30540	112942	ENSG00000163001
CCDC176	Previous symbol	BBOF1	basal body orientation factor 1	14q24.3	HGNC:19855	80127	ENSG00000119636
CCDC57	Approved symbol	CCDC57	coiled-coil domain containing 57	17q25.3	HGNC:27564	284001	ENSG00000176155
CCDC88A	Approved symbol	CCDC88A	coiled-coil domain containing 88A	2p16.1	HGNC:25523	55704	ENSG00000115355
CCDC88B	Approved symbol	CCDC88B	coiled-coil domain containing 88B	11q13.1	HGNC:26757	283234	ENSG00000168071
CCND1	Approved symbol	CCND1	cyclin D1	11q13.3	HGNC:1582	595	ENSG00000110092
CCND2	Approved symbol	CCND2	cyclin D2	12p13.32	HGNC:1583	894	ENSG00000118971
CCNDBP1	Approved symbol	CCNDBP1	cyclin D1 binding protein 1	15q15.2	HGNC:1587	23582	ENSG00000166946
CCNG2	Approved symbol	CCNG2	cyclin G2	4q21.1	HGNC:1593	901	ENSG00000138764
CD34	Approved symbol	CD34	CD34 molecule	1q32.2	HGNC:1662	947	ENSG00000174059
CD9	Approved symbol	CD9	CD9 molecule	12p13.31	HGNC:1709	928	ENSG00000010278
CDC14B	Approved symbol	CDC14B	cell division cycle 14B	9q22.32-q22.33	HGNC:1719	8555	ENSG00000081377
CDC25B	Approved symbol	CDC25B	cell division cycle 25B	20p13	HGNC:1726	994	ENSG00000101224
CDCA4	Approved symbol	CDCA4	cell division cycle associated 4	14q32.33	HGNC:14625	55038	ENSG00000170779
CDH6	Approved symbol	CDH6	cadherin 6	5p13.3	HGNC:1765	1004	ENSG00000113361
CDK10	Approved symbol	CDK10	cyclin dependent kinase 10	16q24.3	HGNC:1770	8558	ENSG00000185324
CDK5RAP3	Approved symbol	CDK5RAP3	CDK5 regulatory subunit associated protein 3	17q21.32	HGNC:18673	80279	ENSG00000108465
CDON	Approved symbol	CDON	cell adhesion associated, oncogene regulated	11q24.2	HGNC:17104	50937	ENSG00000064309
CENPJ	Approved symbol	CENPJ	centromere protein J	13q12.12-q12.13	HGNC:17272	55835	ENSG00000151849
CEP120	Approved symbol	CEP120	centrosomal protein 120	5q23.2	HGNC:26690	153241	ENSG00000168944
CEP135	Approved symbol	CEP135	centrosomal protein 135	4q12	HGNC:29086	9662	ENSG00000174799
CERS4	Approved symbol	CERS4	ceramide synthase 4	19p13.2	HGNC:23747	79603	ENSG00000090661
CFD	Approved symbol	CFD	complement factor D	19p13.3	HGNC:2771	1675	ENSG00000197766
CFI	Approved symbol	CFI	complement factor I	4q25	HGNC:5394	3426	ENSG00000205403
CHD3	Approved symbol	CHD3	chromodomain helicase DNA binding protein 3	17p13.1	HGNC:1918	1107	ENSG00000170004
CHST7	Approved symbol	CHST7	carbohydrate sulfotransferase 7	Xp11.3	HGNC:13817	56548	ENSG00000147119
CILP	Approved symbol	CILP	cartilage intermediate layer protein	15q22.31	HGNC:1980	8483	ENSG00000138615
CKAP2	Approved symbol	CKAP2	cytoskeleton associated protein 2	13q14.3	HGNC:1990	26586	ENSG00000136108
CLK2P	Previous symbol	CLK2P1	CDC like kinase 2, pseudogene 1	7p15.3	HGNC:2070	1197	ENSG00000232553
CLN5	Approved symbol	CLN5	CLN5, intracellular trafficking protein	13q22.3	HGNC:2076	1203	ENSG00000102805
CNOT8	Approved symbol	CNOT8	CCR4-NOT transcription complex subunit 8	5q33.2	HGNC:9207	9337	ENSG00000155508
CNPY4	Approved symbol	CNPY4	canopy FGF signaling regulator 4	7q22.1	HGNC:28631	245812	ENSG00000166997
CNRIP1	Approved symbol	CNRIP1	cannabinoid receptor interacting protein 1	2p14	HGNC:24546	25927	ENSG00000119865
CNTNAP1	Approved symbol	CNTNAP1	contactin associated protein 1	17q21.2	HGNC:8011	8506	ENSG00000108797
COL21A1	Approved symbol	COL21A1	collagen type XXI alpha 1 chain	6p12.1	HGNC:17025	81578	ENSG00000124749
COL8A1	Approved symbol	COL8A1	collagen type VIII alpha 1 chain	3q12.1	HGNC:2215	1295	ENSG00000144810
CORO1B	Approved symbol	CORO1B	coronin 1B	11q13.2	HGNC:2253	57175	ENSG00000172725
CORO2B	Approved symbol	CORO2B	coronin 2B	15q23	HGNC:2256	10391	ENSG00000103647
CPAMD8	Approved symbol	CPAMD8	C3 and PZP like, alpha-2-macroglobulin domain containing 8	19p13.11	HGNC:23228	27151	ENSG00000160111
CPE	Approved symbol	CPE	carboxypeptidase E	4q32.3	HGNC:2303	1363	ENSG00000109472
CPQ	Approved symbol	CPQ	carboxypeptidase Q	8q22.1	HGNC:16910	10404	ENSG00000104324
CPT1A	Approved symbol	CPT1A	carnitine palmitoyltransferase 1A	11q13.3	HGNC:2328	1374	ENSG00000110090
CREBL2	Approved symbol	CREBL2	cAMP responsive element binding protein like 2	12p13.1	HGNC:2350	1389	ENSG00000111269
CREBRF	Approved symbol	CREBRF	CREB3 regulatory factor	5q35.1	HGNC:24050	153222	ENSG00000164463
CRIPAK	Approved symbol	CRIPAK	cysteine rich PAK1 inhibitor	4p16.3	HGNC:26619	285464	ENSG00000179979
CROCC	Approved symbol	CROCC	ciliary rootlet coiled-coil, rootletin	1p36.13	HGNC:21299	9696	ENSG00000058453
CROCCP3	Approved symbol	CROCCP3	ciliary rootlet coiled-coil, rootletin pseudogene 3	1p36.13	HGNC:29405	114819	ENSG00000080947
CSNK1G1	Approved symbol	CSNK1G1	casein kinase 1 gamma 1	15q22.31	HGNC:2454	53944	ENSG00000169118
CSNK1G3	Approved symbol	CSNK1G3	casein kinase 1 gamma 3	5q23.2	HGNC:2456	1456	ENSG00000151292
CSRP2	Approved symbol	CSRP2	cysteine and glycine rich protein 2	12q21.2	HGNC:2470	1466	ENSG00000175183
CTSC	Approved symbol	CTSC	cathepsin C	11q14.2	HGNC:2528	1075	ENSG00000109861
CTSO	Approved symbol	CTSO	cathepsin O	4q32.1	HGNC:2542	1519	ENSG00000256043
CXCL12	Approved symbol	CXCL12	C-X-C motif chemokine ligand 12	10q11.21	HGNC:10672	6387	ENSG00000107562
CXCL14	Approved symbol	CXCL14	C-X-C motif chemokine ligand 14	5q31.1	HGNC:10640	9547	ENSG00000145824
CYB5A	Approved symbol	CYB5A	cytochrome b5 type A	18q22.3	HGNC:2570	1528	ENSG00000166347
DAPK1	Approved symbol	DAPK1	death associated protein kinase 1	9q21.33	HGNC:2674	1612	ENSG00000196730
DAZAP2	Approved symbol	DAZAP2	DAZ associated protein 2	12q13.13	HGNC:2684	9802	ENSG00000183283
DBF4B	Approved symbol	DBF4B	DBF4 zinc finger B	17q21.31	HGNC:17883	80174	ENSG00000161692
DBNL	Approved symbol	DBNL	drebrin like	7p13	HGNC:2696	28988	ENSG00000136279
DCBLD2	Approved symbol	DCBLD2	discoidin, CUB and LCCL domain containing 2	3q12.1	HGNC:24627	131566	ENSG00000057019
DCLK2	Approved symbol	DCLK2	doublecortin like kinase 2	4q31.23-q31.3	HGNC:19002	166614	ENSG00000170390
DDR2	Approved symbol	DDR2	discoidin domain receptor tyrosine kinase 2	1q23.3	HGNC:2731	4921	ENSG00000162733
DDX12P	Approved symbol	DDX12P	DEAD/H-box helicase 12, pseudogene	12p13.31	HGNC:2737	440081	ENSG00000214826
DENND4C	Approved symbol	DENND4C	DENN domain containing 4C	9p22.1	HGNC:26079	55667	ENSG00000137145
DENND6A	Approved symbol	DENND6A	DENN domain containing 6A	3p14.3	HGNC:26635	201627	ENSG00000174839
DGUOK	Approved symbol	DGUOK	deoxyguanosine kinase	2p13.1	HGNC:2858	1716	ENSG00000114956
DHFRL1	Previous symbol	DHFR2	dihydrofolate reductase 2	3q11.2	HGNC:27309	200895	ENSG00000178700
DKK3	Approved symbol	DKK3	dickkopf WNT signaling pathway inhibitor 3	11p15.3	HGNC:2893	27122	ENSG00000050165
DLG1	Approved symbol	DLG1	discs large MAGUK scaffold protein 1	3q29	HGNC:2900	1739	ENSG00000075711
DLG3	Approved symbol	DLG3	discs large MAGUK scaffold protein 3	Xq13.1	HGNC:2902	1741	ENSG00000082458
DLL1	Approved symbol	DLL1	delta like canonical Notch ligand 1	6q27	HGNC:2908	28514	ENSG00000198719
DMXL2	Approved symbol	DMXL2	Dmx like 2	15q21.2	HGNC:2938	23312	ENSG00000104093
DNAJC10	Approved symbol	DNAJC10	DnaJ heat shock protein family (Hsp40) member C10	2q32.1	HGNC:24637	54431	ENSG00000077232
DOCK1	Approved symbol	DOCK1	dedicator of cytokinesis 1	10q26.2	HGNC:2987	1793	ENSG00000150760
DOCK7	Approved symbol	DOCK7	dedicator of cytokinesis 7	1p31.3	HGNC:19190	85440	ENSG00000116641
DOCK8	Approved symbol	DOCK8	dedicator of cytokinesis 8	9p24.3	HGNC:19191	81704	ENSG00000107099
DPT	Approved symbol	DPT	dermatopontin	1q24.2	HGNC:3011	1805	ENSG00000143196
DPY19L3	Approved symbol	DPY19L3	dpy-19 like C-mannosyltransferase 3	19q13.11	HGNC:27120	147991	ENSG00000178904
DSTN	Approved symbol	DSTN	destrin, actin depolymerizing factor	20p12.1	HGNC:15750	11034	ENSG00000125868
DTX2P1-UPK3BP1-PMS2P11	Approved symbol	DTX2P1-UPK3BP1-PMS2P11	DTX2P1-UPK3BP1-PMS2P11 readthrough, transcribed pseudogene	7q11.23	HGNC:42360	441263	ENSG00000265479
DYNC2H1	Approved symbol	DYNC2H1	dynein cytoplasmic 2 heavy chain 1	11q22.3	HGNC:2962	79659	ENSG00000187240
DZIP1	Approved symbol	DZIP1	DAZ interacting zinc finger protein 1	13q32.1	HGNC:20908	22873	ENSG00000134874
EBF1	Approved symbol	EBF1	early B cell factor 1	5q33.3	HGNC:3126	1879	ENSG00000164330
ECM2	Approved symbol	ECM2	extracellular matrix protein 2	9q22.31	HGNC:3154	1842	ENSG00000106823
EDEM2	Approved symbol	EDEM2	ER degradation enhancing alpha-mannosidase like protein 2	20q11.22	HGNC:15877	55741	ENSG00000088298
EEF1A1	Approved symbol	EEF1A1	eukaryotic translation elongation factor 1 alpha 1	6q13	HGNC:3189	1915	ENSG00000156508
EFHD1	Approved symbol	EFHD1	EF-hand domain family member D1	2q37.1	HGNC:29556	80303	ENSG00000115468
EFS	Approved symbol	EFS	embryonal Fyn-associated substrate	14q11.2	HGNC:16898	10278	ENSG00000100842
EGFR	Approved symbol	EGFR	epidermal growth factor receptor	7p11.2	HGNC:3236	1956	ENSG00000146648
ELMO1	Approved symbol	ELMO1	engulfment and cell motility 1	7p14.2-p14.1	HGNC:16286	9844	ENSG00000155849
ELMOD3	Approved symbol	ELMOD3	ELMO domain containing 3	2p11.2	HGNC:26158	84173	ENSG00000115459
EMX2OS	Approved symbol	EMX2OS	EMX2 opposite strand/antisense RNA	10q26.11	HGNC:18511	196047	ENSG00000229847
ENPP2	Approved symbol	ENPP2	ectonucleotide pyrophosphatase/phosphodiesterase 2	8q24.12	HGNC:3357	5168	ENSG00000136960
ENTPD1	Approved symbol	ENTPD1	ectonucleoside triphosphate diphosphohydrolase 1	10q24.1	HGNC:3363	953	ENSG00000138185
EPHX1	Approved symbol	EPHX1	epoxide hydrolase 1	1q42.12	HGNC:3401	2052	ENSG00000143819
EVC	Approved symbol	EVC	EvC ciliary complex subunit 1	4p16.2	HGNC:3497	2121	ENSG00000072840
EVI5	Approved symbol	EVI5	ecotropic viral integration site 5	1p22.1	HGNC:3501	7813	ENSG00000067208
EXO5	Approved symbol	EXO5	exonuclease 5	1p34.2	HGNC:26115	64789	ENSG00000164002
F10	Approved symbol	F10	coagulation factor X	13q34	HGNC:3528	2159	ENSG00000126218
F3	Approved symbol	F3	coagulation factor III, tissue factor	1p21.3	HGNC:3541	2152	ENSG00000117525
FAH	Approved symbol	FAH	fumarylacetoacetate hydrolase	15q25.1	HGNC:3579	2184	ENSG00000103876
FAM102B	Approved symbol	FAM102B	family with sequence similarity 102 member B	1p13.3	HGNC:27637	284611	ENSG00000162636
FAM117A	Approved symbol	FAM117A	family with sequence similarity 117 member A	17q21.33	HGNC:24179	81558	ENSG00000121104
FAM122B	Approved symbol	FAM122B	family with sequence similarity 122B	Xq26.3	HGNC:30490	159090	ENSG00000156504
FAM13A	Approved symbol	FAM13A	family with sequence similarity 13 member A	4q22.1	HGNC:19367	10144	ENSG00000138640
FAM172A	Approved symbol	FAM172A	family with sequence similarity 172 member A	5q15	HGNC:25365	83989	ENSG00000113391
FAM208A	Approved symbol	FAM208A	family with sequence similarity 208 member A	3p14.3	HGNC:30314	23272	ENSG00000163946
FAM213A	Approved symbol	FAM213A	family with sequence similarity 213 member A	10q23.1	HGNC:28651	84293	ENSG00000122378
FAM46A	Approved symbol	FAM46A	family with sequence similarity 46 member A	6q14.1	HGNC:18345	55603	ENSG00000112773
FANCF	Approved symbol	FANCF	Fanconi anemia complementation group F	11p14.3	HGNC:3587	2188	ENSG00000183161
FANCG	Approved symbol	FANCG	Fanconi anemia complementation group G	9p13.3	HGNC:3588	2189	ENSG00000221829
FAR2	Approved symbol	FAR2	fatty acyl-CoA reductase 2	12p11.22	HGNC:25531	55711	ENSG00000064763
FBLN5	Approved symbol	FBLN5	fibulin 5	14q32.12	HGNC:3602	10516	ENSG00000140092
FBXL7	Approved symbol	FBXL7	F-box and leucine rich repeat protein 7	5p15.1	HGNC:13604	23194	ENSG00000183580
FBXO17	Approved symbol	FBXO17	F-box protein 17	19q13.2	HGNC:18754	115290	ENSG00000269190
FBXO33	Approved symbol	FBXO33	F-box protein 33	14q21.1	HGNC:19833	254170	ENSG00000165355
FBXO4	Approved symbol	FBXO4	F-box protein 4	5p13.1	HGNC:13583	26272	ENSG00000151876
FBXO7	Approved symbol	FBXO7	F-box protein 7	22q12.3	HGNC:13586	25793	ENSG00000100225
FCHSD2	Approved symbol	FCHSD2	FCH and double SH3 domains 2	11q13.4	HGNC:29114	9873	ENSG00000137478
FGF2	Approved symbol	FGF2	fibroblast growth factor 2	4q28.1	HGNC:3676	2247	ENSG00000138685
FKBP2	Approved symbol	FKBP2	FK506 binding protein 2	11q13.1	HGNC:3718	2286	ENSG00000173486
FMOD	Approved symbol	FMOD	fibromodulin	1q32.1	HGNC:3774	2331	ENSG00000122176
FMR1	Approved symbol	FMR1	fragile X mental retardation 1	Xq27.3	HGNC:3775	2332	ENSG00000102081
FN3KRP	Approved symbol	FN3KRP	fructosamine 3 kinase related protein	17q25.3	HGNC:25700	79672	ENSG00000141560
FOCAD	Approved symbol	FOCAD	focadhesin	9p21.3	HGNC:23377	54914	ENSG00000188352
FOXC1	Approved symbol	FOXC1	forkhead box C1	6p25.3	HGNC:3800	2296	ENSG00000054598
FREM1	Approved symbol	FREM1	FRAS1 related extracellular matrix 1	9p22.3	HGNC:23399	158326	ENSG00000164946
FRMD4B	Approved symbol	FRMD4B	FERM domain containing 4B	3p14.1	HGNC:24886	23150	ENSG00000114541
FST	Approved symbol	FST	follistatin	5q11.2	HGNC:3971	10468	ENSG00000134363
FYN	Approved symbol	FYN	FYN proto-oncogene, Src family tyrosine kinase	6q21	HGNC:4037	2534	ENSG00000010810
FZD4	Approved symbol	FZD4	frizzled class receptor 4	11q14.2	HGNC:4042	8322	ENSG00000174804
GALNT15	Approved symbol	GALNT15	polypeptide N-acetylgalactosaminyltransferase 15	3p25.1	HGNC:21531	117248	ENSG00000131386
GAS2L1	Approved symbol	GAS2L1	growth arrest specific 2 like 1	22q12.2	HGNC:16955	10634	ENSG00000185340
GBAP1	Approved symbol	GBAP1	glucosylceramidase beta pseudogene 1	1q22	HGNC:4178	2630	ENSG00000160766
GFRA1	Approved symbol	GFRA1	GDNF family receptor alpha 1	10q25.3	HGNC:4243	2674	ENSG00000151892
GLA	Approved symbol	GLA	galactosidase alpha	Xq22.1	HGNC:4296	2717	ENSG00000102393
GLI2	Approved symbol	GLI2	GLI family zinc finger 2	2q14.2	HGNC:4318	2736	ENSG00000074047
GLOD4	Approved symbol	GLOD4	glyoxalase domain containing 4	17p13.3	HGNC:14111	51031	ENSG00000167699
GLRB	Approved symbol	GLRB	glycine receptor beta	4q32.1	HGNC:4329	2743	ENSG00000109738
GLT8D1	Approved symbol	GLT8D1	glycosyltransferase 8 domain containing 1	3p21.1	HGNC:24870	55830	ENSG00000016864
GLT8D2	Approved symbol	GLT8D2	glycosyltransferase 8 domain containing 2	12q23.3	HGNC:24890	83468	ENSG00000120820
GNB1	Approved symbol	GNB1	G protein subunit beta 1	1p36.33	HGNC:4396	2782	ENSG00000078369
GNB4	Approved symbol	GNB4	G protein subunit beta 4	3q26.33	HGNC:20731	59345	ENSG00000114450
GNB5	Approved symbol	GNB5	G protein subunit beta 5	15q21.2	HGNC:4401	10681	ENSG00000069966
GNG2	Approved symbol	GNG2	G protein subunit gamma 2	14q22.1	HGNC:4404	54331	ENSG00000186469
GNS	Approved symbol	GNS	glucosamine (N-acetyl)-6-sulfatase	12q14.3	HGNC:4422	2799	ENSG00000135677
GOPC	Approved symbol	GOPC	golgi associated PDZ and coiled-coil motif containing	6q22.1	HGNC:17643	57120	ENSG00000047932
GPER1	Approved symbol	GPER1	G protein-coupled estrogen receptor 1	7p22.3	HGNC:4485	2852	ENSG00000164850
GPR124	Previous symbol	ADGRA2	adhesion G protein-coupled receptor A2	8p11.23	HGNC:17849	25960	ENSG00000020181
GSTCD	Approved symbol	GSTCD	glutathione S-transferase C-terminal domain containing	4q24	HGNC:25806	79807	ENSG00000138780
GSTM5	Approved symbol	GSTM5	glutathione S-transferase mu 5	1p13.3	HGNC:4637	2949	ENSG00000134201
GUSB	Approved symbol	GUSB	glucuronidase beta	7q11.21	HGNC:4696	2990	ENSG00000169919
HAUS7	Approved symbol	HAUS7	HAUS augmin like complex subunit 7	Xq28	HGNC:32979	55559	ENSG00000213397
HDAC10	Approved symbol	HDAC10	histone deacetylase 10	22q13.33	HGNC:18128	83933	ENSG00000100429
HEATR5B	Approved symbol	HEATR5B	HEAT repeat containing 5B	2p22.2	HGNC:29273	54497	ENSG00000008869
HEG1	Approved symbol	HEG1	heart development protein with EGF like domains 1	3q21.2	HGNC:29227	57493	ENSG00000173706
HEMK1	Approved symbol	HEMK1	HemK methyltransferase family member 1	3p21.31	HGNC:24923	51409	ENSG00000114735
HFE	Approved symbol	HFE	homeostatic iron regulator	6p22.2	HGNC:4886	3077	ENSG00000010704
HIP1	Approved symbol	HIP1	huntingtin interacting protein 1	7q11.23	HGNC:4913	3092	ENSG00000127946
HNMT	Approved symbol	HNMT	histamine N-methyltransferase	2q22.1	HGNC:5028	3176	ENSG00000150540
HPS5	Approved symbol	HPS5	HPS5, biogenesis of lysosomal organelles complex 2 subunit 2	11p15.1	HGNC:17022	11234	ENSG00000110756
HRCT1	Approved symbol	HRCT1	histidine rich carboxyl terminus 1	9p13.3	HGNC:33872	646962	ENSG00000196196
HSD11B1	Approved symbol	HSD11B1	hydroxysteroid 11-beta dehydrogenase 1	1q32.2	HGNC:5208	3290	ENSG00000117594
HSD17B11	Approved symbol	HSD17B11	hydroxysteroid 17-beta dehydrogenase 11	4q22.1	HGNC:22960	51170	ENSG00000198189
HSPG2	Approved symbol	HSPG2	heparan sulfate proteoglycan 2	1p36.12	HGNC:5273	3339	ENSG00000142798
HVCN1	Approved symbol	HVCN1	hydrogen voltage gated channel 1	12q24.11	HGNC:28240	84329	ENSG00000122986
ID2	Approved symbol	ID2	inhibitor of DNA binding 2	2p25.1	HGNC:5361	3398	ENSG00000115738
IFT122	Approved symbol	IFT122	intraflagellar transport 122	3q21.3-q22.1	HGNC:13556	55764	ENSG00000163913
IFT43	Approved symbol	IFT43	intraflagellar transport 43	14q24.3	HGNC:29669	112752	ENSG00000119650
IFT52	Approved symbol	IFT52	intraflagellar transport 52	20q13.12	HGNC:15901	51098	ENSG00000101052
IGF1	Approved symbol	IGF1	insulin like growth factor 1	12q23.2	HGNC:5464	3479	ENSG00000017427
IGFBP3	Approved symbol	IGFBP3	insulin like growth factor binding protein 3	7p12.3	HGNC:5472	3486	ENSG00000146674
IKBKAP	Previous symbol	ELP1	elongator complex protein 1	9q31.3	HGNC:5959	8518	ENSG00000070061
IL16	Approved symbol	IL16	interleukin 16	15q25.1	HGNC:5980	3603	ENSG00000172349
IMPDH1	Approved symbol	IMPDH1	inosine monophosphate dehydrogenase 1	7q32.1	HGNC:6052	3614	ENSG00000106348
INPP5E	Approved symbol	INPP5E	inositol polyphosphate-5-phosphatase E	9q34.3	HGNC:21474	56623	ENSG00000148384
IRAK4	Approved symbol	IRAK4	interleukin 1 receptor associated kinase 4	12q12	HGNC:17967	51135	ENSG00000198001
IRF3	Approved symbol	IRF3	interferon regulatory factor 3	19q13.33	HGNC:6118	3661	ENSG00000126456
ITGB1BP1	Approved symbol	ITGB1BP1	integrin subunit beta 1 binding protein 1	2p25.1	HGNC:23927	9270	ENSG00000119185
ITGBL1	Approved symbol	ITGBL1	integrin subunit beta like 1	13q33.1	HGNC:6164	9358	ENSG00000198542
ITIH5	Approved symbol	ITIH5	inter-alpha-trypsin inhibitor heavy chain family member 5	10p14	HGNC:21449	80760	ENSG00000123243
ITM2B	Approved symbol	ITM2B	integral membrane protein 2B	13q14.2	HGNC:6174	9445	ENSG00000136156
ITPR1	Approved symbol	ITPR1	inositol 1,4,5-trisphosphate receptor type 1	3p26.1	HGNC:6180	3708	ENSG00000150995
ITPR2	Approved symbol	ITPR2	inositol 1,4,5-trisphosphate receptor type 2	12p11.23	HGNC:6181	3709	ENSG00000123104
KCNAB1	Approved symbol	KCNAB1	potassium voltage-gated channel subfamily A member regulatory beta subunit 1	3q25.31	HGNC:6228	7881	ENSG00000169282
KCTD13	Approved symbol	KCTD13	potassium channel tetramerization domain containing 13	16p11.2	HGNC:22234	253980	ENSG00000174943
KIAA0753	Approved symbol	KIAA0753	KIAA0753	17p13.1	HGNC:29110	9851	ENSG00000198920
KIAA0895L	Approved symbol	KIAA0895L	KIAA0895 like	16q22.1	HGNC:34408	653319	ENSG00000196123
KIAA1009	Previous symbol	CEP162	centrosomal protein 162	6q14.2-q14.3	HGNC:21107	22832	ENSG00000135315
KIAA1324L	Approved symbol	KIAA1324L	KIAA1324 like	7q21.12	HGNC:21945	222223	ENSG00000164659
KIAA1429	Previous symbol	VIRMA	vir like m6A methyltransferase associated	8q22.1	HGNC:24500	25962	ENSG00000164944
KIFC2	Approved symbol	KIFC2	kinesin family member C2	8q24.3	HGNC:29530	90990	ENSG00000167702
KLF4	Approved symbol	KLF4	Kruppel like factor 4	9q31.2	HGNC:6348	9314	ENSG00000136826
KLHL3	Approved symbol	KLHL3	kelch like family member 3	5q31.2	HGNC:6354	26249	ENSG00000146021
KLHL36	Approved symbol	KLHL36	kelch like family member 36	16q24.1	HGNC:17844	79786	ENSG00000135686
KNTC1	Approved symbol	KNTC1	kinetochore associated 1	12q24.31	HGNC:17255	9735	ENSG00000184445
L3MBTL3	Approved symbol	L3MBTL3	L3MBTL3, histone methyl-lysine binding protein	6q23.1	HGNC:23035	84456	ENSG00000198945
LAMA3	Approved symbol	LAMA3	laminin subunit alpha 3	18q11.2	HGNC:6483	3909	ENSG00000053747
LAPTM4A	Approved symbol	LAPTM4A	lysosomal protein transmembrane 4 alpha	2p24.1	HGNC:6924	9741	ENSG00000068697
LASP1	Approved symbol	LASP1	LIM and SH3 protein 1	17q12	HGNC:6513	3927	ENSG00000002834
LCA5	Approved symbol	LCA5	LCA5, lebercilin	6q14.1	HGNC:31923	167691	ENSG00000135338
LDLRAD3	Approved symbol	LDLRAD3	low density lipoprotein receptor class A domain containing 3	11p13	HGNC:27046	143458	ENSG00000179241
LEPROT	Approved symbol	LEPROT	leptin receptor overlapping transcript	1p31.3	HGNC:29477	54741	ENSG00000213625
LFNG	Approved symbol	LFNG	LFNG O-fucosylpeptide 3-beta-N-acetylglucosaminyltransferase	7p22.3	HGNC:6560	3955	ENSG00000106003
LHFP	Previous symbol	LHFPL6	LHFPL tetraspan subfamily member 6	13q13.3-q14.11	HGNC:6586	10186	ENSG00000183722
LHX6	Approved symbol	LHX6	LIM homeobox 6	9q33.2	HGNC:21735	26468	ENSG00000106852
LINC00883	Previous symbol	DUBR	DPPA2 upstream binding RNA	3q13.12	HGNC:48569	344595	ENSG00000243701
LOC100289097	Unmatched
LOC642846	Unmatched
LOC645513	Unmatched
LOC728743	Unmatched
LPCAT2	Approved symbol	LPCAT2	lysophosphatidylcholine acyltransferase 2	16q12.2	HGNC:26032	54947	ENSG00000087253
LPHN2	Previous symbol	ADGRL2	adhesion G protein-coupled receptor L2	1p31.1	HGNC:18582	23266	ENSG00000117114
LPIN3	Approved symbol	LPIN3	lipin 3	20q12	HGNC:14451	64900	ENSG00000132793
LRIG3	Approved symbol	LRIG3	leucine rich repeats and immunoglobulin like domains 3	12q14.1	HGNC:30991	121227	ENSG00000139263
LRP11	Approved symbol	LRP11	LDL receptor related protein 11	6q25.1	HGNC:16936	84918	ENSG00000120256
LRR1	Approved symbol	LRR1	leucine rich repeat protein 1	14q21.3	HGNC:19742	122769	ENSG00000165501
LRRC37A	Approved symbol	LRRC37A	leucine rich repeat containing 37A	17q21.31	HGNC:29069	9884	ENSG00000176681
LRRC37A2	Approved symbol	LRRC37A2	leucine rich repeat containing 37 member A2	17q21.31	HGNC:32404	474170	ENSG00000238083
LRRC37A3	Approved symbol	LRRC37A3	leucine rich repeat containing 37 member A3	17q24.1	HGNC:32427	374819	ENSG00000176809
LRRC37A4P	Approved symbol	LRRC37A4P	leucine rich repeat containing 37 member A4, pseudogene	17q21.31	HGNC:25479	55073	ENSG00000214425
LRRC57	Approved symbol	LRRC57	leucine rich repeat containing 57	15q15.2	HGNC:26719	255252	ENSG00000180979
LTB4R	Approved symbol	LTB4R	leukotriene B4 receptor	14q12	HGNC:6713	1241	ENSG00000213903
LTBP1	Approved symbol	LTBP1	latent transforming growth factor beta binding protein 1	2p22.3	HGNC:6714	4052	ENSG00000049323
LYST	Approved symbol	LYST	lysosomal trafficking regulator	1q42.3	HGNC:1968	1130	ENSG00000143669
LZTFL1	Approved symbol	LZTFL1	leucine zipper transcription factor like 1	3p21.31	HGNC:6741	54585	ENSG00000163818
MAGEH1	Approved symbol	MAGEH1	MAGE family member H1	Xp11.21	HGNC:24092	28986	ENSG00000187601
MAGI2-AS3	Approved symbol	MAGI2-AS3	MAGI2 antisense RNA 3	7q21.11	HGNC:40862	100505881	ENSG00000234456
MAGOHB	Approved symbol	MAGOHB	mago homolog B, exon junction complex core component	12p13.2	HGNC:25504	55110	ENSG00000111196
MAML1	Approved symbol	MAML1	mastermind like transcriptional coactivator 1	5q35.3	HGNC:13632	9794	ENSG00000161021
MAML3	Approved symbol	MAML3	mastermind like transcriptional coactivator 3	4q31.1	HGNC:16272	55534	ENSG00000196782
MANBA	Approved symbol	MANBA	mannosidase beta	4q24	HGNC:6831	4126	ENSG00000109323
MANBAL	Approved symbol	MANBAL	mannosidase beta like	20q11.23	HGNC:15799	63905	ENSG00000101363
MANEA	Approved symbol	MANEA	mannosidase endo-alpha	6q16.1	HGNC:21072	79694	ENSG00000172469
MANSC1	Approved symbol	MANSC1	MANSC domain containing 1	12p13.2	HGNC:25505	54682	ENSG00000111261
MAP1B	Approved symbol	MAP1B	microtubule associated protein 1B	5q13.2	HGNC:6836	4131	ENSG00000131711
MAP3K12	Approved symbol	MAP3K12	mitogen-activated protein kinase kinase kinase 12	12q13.13	HGNC:6851	7786	ENSG00000139625
MARC1	Approved symbol	MARC1	mitochondrial amidoxime reducing component 1	1q41	HGNC:26189	64757	ENSG00000186205
MARCKS	Approved symbol	MARCKS	myristoylated alanine rich protein kinase C substrate	6q21	HGNC:6759	4082	ENSG00000277443
MBOAT1	Approved symbol	MBOAT1	membrane bound O-acyltransferase domain containing 1	6p22.3	HGNC:21579	154141	ENSG00000172197
MCM9	Approved symbol	MCM9	minichromosome maintenance 9 homologous recombination repair factor	6q22.31	HGNC:21484	254394	ENSG00000111877
MDK	Approved symbol	MDK	midkine	11p11.2	HGNC:6972	4192	ENSG00000110492
MEIS3P1	Approved symbol	MEIS3P1	Meis homeobox 3 pseudogene 1	17p12	HGNC:7002	4213	ENSG00000179277
MEOX2	Approved symbol	MEOX2	mesenchyme homeobox 2	7p21.2	HGNC:7014	4223	ENSG00000106511
MGP	Approved symbol	MGP	matrix Gla protein	12p12.3	HGNC:7060	4256	ENSG00000111341
MIS18BP1	Approved symbol	MIS18BP1	MIS18 binding protein 1	14q21.2	HGNC:20190	55320	ENSG00000129534
MITD1	Approved symbol	MITD1	microtubule interacting and trafficking domain containing 1	2q11.2	HGNC:25207	129531	ENSG00000158411
MLPH	Approved symbol	MLPH	melanophilin	2q37.3	HGNC:29643	79083	ENSG00000115648
MMP28	Approved symbol	MMP28	matrix metallopeptidase 28	17q12	HGNC:14366	79148	ENSG00000271447
MON1B	Approved symbol	MON1B	MON1 homolog B, secretory trafficking associated	16q23.1	HGNC:25020	22879	ENSG00000103111
MPV17	Approved symbol	MPV17	MPV17, mitochondrial inner membrane protein	2p23.3	HGNC:7224	4358	ENSG00000115204
MPZL1	Approved symbol	MPZL1	myelin protein zero like 1	1q24.2	HGNC:7226	9019	ENSG00000197965
MR1	Approved symbol	MR1	major histocompatibility complex, class I-related	1q25.3	HGNC:4975	3140	ENSG00000153029
MRC1	Approved symbol	MRC1	mannose receptor C-type 1	10p12.33	HGNC:7228	4360	ENSG00000260314
MSMO1	Approved symbol	MSMO1	methylsterol monooxygenase 1	4q32.3	HGNC:10545	6307	ENSG00000052802
MST1	Approved symbol	MST1	macrophage stimulating 1	3p21.31	HGNC:7380	4485	ENSG00000173531
MSTO1	Approved symbol	MSTO1	misato 1, mitochondrial distribution and morphology regulator	1q22	HGNC:29678	55154	ENSG00000125459
MSTO2P	Approved symbol	MSTO2P	misato family member 2, pseudogene	1q22	HGNC:26329	100129405	ENSG00000203761
MTX1	Approved symbol	MTX1	metaxin 1	1q22	HGNC:7504	4580	ENSG00000173171
MYH10	Approved symbol	MYH10	myosin heavy chain 10	17p13.1	HGNC:7568	4628	ENSG00000133026
MYH11	Approved symbol	MYH11	myosin heavy chain 11	16p13.11	HGNC:7569	4629	ENSG00000133392
MYL9	Approved symbol	MYL9	myosin light chain 9	20q11.23	HGNC:15754	10398	ENSG00000101335
MYLK	Approved symbol	MYLK	myosin light chain kinase	3q21.1	HGNC:7590	4638	ENSG00000065534
MYO7A	Approved symbol	MYO7A	myosin VIIA	11q13.5	HGNC:7606	4647	ENSG00000137474
MYZAP	Approved symbol	MYZAP	myocardial zonula adherens protein	15q21.3	HGNC:43444	100820829	ENSG00000263155
NAAA	Approved symbol	NAAA	N-acylethanolamine acid amidase	4q21.1	HGNC:736	27163	ENSG00000138744
NAGLU	Approved symbol	NAGLU	N-acetyl-alpha-glucosaminidase	17q21.2	HGNC:7632	4669	ENSG00000108784
NAV3	Approved symbol	NAV3	neuron navigator 3	12q21.2	HGNC:15998	89795	ENSG00000067798
NBPF25P	Approved symbol	NBPF25P	NBPF member 25, pseudogene	1q21.1	HGNC:45046	101929780	ENSG00000272150
NBPF3	Approved symbol	NBPF3	NBPF member 3	1p36.12	HGNC:25076	84224	ENSG00000142794
NCAPD3	Approved symbol	NCAPD3	non-SMC condensin II complex subunit D3	11q25	HGNC:28952	23310	ENSG00000151503
NET1	Approved symbol	NET1	neuroepithelial cell transforming 1	10p15.1	HGNC:14592	10276	ENSG00000173848
NFIB	Approved symbol	NFIB	nuclear factor I B	9p23-p22.3	HGNC:7785	4781	ENSG00000147862
NGFRAP1	Previous symbol	BEX3	brain expressed X-linked 3	Xq22.2	HGNC:13388	27018	ENSG00000166681
NIPSNAP1	Approved symbol	NIPSNAP1	nipsnap homolog 1	22q12.2	HGNC:7827	8508	ENSG00000184117
NLRP1	Approved symbol	NLRP1	NLR family pyrin domain containing 1	17p13	HGNC:14374	22861	ENSG00000091592
NOVA1	Approved symbol	NOVA1	NOVA alternative splicing regulator 1	14q12	HGNC:7886	4857	ENSG00000139910
NPDC1	Approved symbol	NPDC1	neural proliferation, differentiation and control 1	9q34.3	HGNC:7899	56654	ENSG00000107281
NPR1	Approved symbol	NPR1	natriuretic peptide receptor 1	1q21.3	HGNC:7943	4881	ENSG00000169418
NR1H3	Approved symbol	NR1H3	nuclear receptor subfamily 1 group H member 3	11p11.2	HGNC:7966	10062	ENSG00000025434
NRM	Approved symbol	NRM	nurim	6p21.33	HGNC:8003	11270	ENSG00000137404
NRP2	Approved symbol	NRP2	neuropilin 2	2q33.3	HGNC:8005	8828	ENSG00000118257
NSMF	Approved symbol	NSMF	NMDA receptor synaptonuclear signaling and neuronal migration factor	9q34.3	HGNC:29843	26012	ENSG00000165802
NTN1	Approved symbol	NTN1	netrin 1	17p13.1	HGNC:8029	9423	ENSG00000065320
NUP107	Approved symbol	NUP107	nucleoporin 107	12q15	HGNC:29914	57122	ENSG00000111581
NUP50	Approved symbol	NUP50	nucleoporin 50	22q13.31	HGNC:8065	10762	ENSG00000093000
NXPH3	Approved symbol	NXPH3	neurexophilin 3	17q21.33	HGNC:8077	11248	ENSG00000182575
OAF	Approved symbol	OAF	out at first homolog	11q23.3	HGNC:28752	220323	ENSG00000184232
ODF2L	Approved symbol	ODF2L	outer dense fiber of sperm tails 2 like	1p22.3	HGNC:29225	57489	ENSG00000122417
ODF3B	Approved symbol	ODF3B	outer dense fiber of sperm tails 3B	22q13.33	HGNC:34388	440836	ENSG00000177989
OGG1	Approved symbol	OGG1	8-oxoguanine DNA glycosylase	3p25.3	HGNC:8125	4968	ENSG00000114026
OGN	Approved symbol	OGN	osteoglycin	9q22.31	HGNC:8126	4969	ENSG00000106809
OLFML2B	Approved symbol	OLFML2B	olfactomedin like 2B	1q23.3	HGNC:24558	25903	ENSG00000162745
ORAI3	Approved symbol	ORAI3	ORAI calcium release-activated calcium modulator 3	16p11.2	HGNC:28185	93129	ENSG00000175938
OSR2	Approved symbol	OSR2	odd-skipped related transciption factor 2	8q22.2	HGNC:15830	116039	ENSG00000164920
PAPSS1	Approved symbol	PAPSS1	3'-phosphoadenosine 5'-phosphosulfate synthase 1	4q25	HGNC:8603	9061	ENSG00000138801
PAPSS2	Approved symbol	PAPSS2	3'-phosphoadenosine 5'-phosphosulfate synthase 2	10q23.2-q23.31	HGNC:8604	9060	ENSG00000198682
PARP8	Approved symbol	PARP8	poly(ADP-ribose) polymerase family member 8	5q11.1	HGNC:26124	79668	ENSG00000151883
PCDH19	Approved symbol	PCDH19	protocadherin 19	Xq22.1	HGNC:14270	57526	ENSG00000165194
PCDHB16	Approved symbol	PCDHB16	protocadherin beta 16	5q31.3	HGNC:14546	57717	ENSG00000272674
PCDHB4	Approved symbol	PCDHB4	protocadherin beta 4	5q31.3	HGNC:8689	56131	ENSG00000081818
PCSK5	Approved symbol	PCSK5	proprotein convertase subtilisin/kexin type 5	9q21.13	HGNC:8747	5125	ENSG00000099139
PDCD6	Approved symbol	PDCD6	programmed cell death 6	5p15.33	HGNC:8765	10016	ENSG00000249915
PDCD6IP	Approved symbol	PDCD6IP	programmed cell death 6 interacting protein	3p22.3	HGNC:8766	10015	ENSG00000170248
PDE1A	Approved symbol	PDE1A	phosphodiesterase 1A	2q32.1	HGNC:8774	5136	ENSG00000115252
PDGFD	Approved symbol	PDGFD	platelet derived growth factor D	11q22.3	HGNC:30620	80310	ENSG00000170962
PDK3	Approved symbol	PDK3	pyruvate dehydrogenase kinase 3	Xp22.11	HGNC:8811	5165	ENSG00000067992
PECR	Approved symbol	PECR	peroxisomal trans-2-enoyl-CoA reductase	2q35	HGNC:18281	55825	ENSG00000115425
[truncated: 226 more rows]

[truncated: 47 more sheets: M11, M12, M13, M14, M15, M16, M17, M18, M19, M20, M21, M22, M23, M24, M25, M26, M27, M28, M29, M30 …]
