# Supplementary material for: Network analysis of human muscle adaptation to aging and contraction
Source: Aging (Albany NY). 2020 Jan 7;12(1):740–55. doi: 10.18632/aging.102653 (PMC6977671; doi:10.18632/aging.102653)
Supplement: Supplementary Table 2 [file aging-12-102653-s003..xlsx]

## Sheet: M1
Term ID	Term description	Genes in term (%)	P-value (BH-corrected)	Module genes in term
Gene Ontology:- Biological Process
No enriched terms
Gene Ontology:- Cellular Component
GO:0030017	sarcomere	3.30935	0.0482417	LMOD3, CAPZB, PALLD, DNAJB6, NOS1, PSEN2, HDAC4, KCNN2, CACNA1S, RYR3, JUP, CASQ2, SMTNL1, MYH2, ANK2, FHOD3, MYOM1, LDB3, MYOZ3, CALM3, SYNPO, ACTN2, JPH2
Gene Ontology:- Molecular Function
No enriched terms

## Sheet: M2
Term ID	Term description	Genes in term (%)	P-value (BH-corrected)	Module genes in term
Gene Ontology:- Biological Process
GO:0006955	immune response	60	4.2686e-23	HLA-DOA, STAT1, TAP2, TAP1, BTN3A3, IFIT3, HLA-C, HLA-B, IRF1, HLA-DMB, HLA-DMA, HLA-F, HLA-A, PSMB9, HLA-DPA1, APOL1, HLA-DPB1, IFI35, HLA-DQA1, GBP1, HLA-H, BTN3A2, BTN3A1, PSME1, IRF9, PSME2, CD74, PSMB8, PARP9, CIITA, LIME1, NMI, B2M, NLRC5, HLA-DRB1, HLA-DRA
GO:0060333	interferon-gamma-mediated signaling pathway	30	5.88214e-23	HLA-DPA1, HLA-DPB1, HLA-DQA1, HLA-H, GBP1, STAT1, IRF9, CIITA, NMI, HLA-C, HLA-B, IRF1, B2M, NLRC5, HLA-F, HLA-A, HLA-DRB1, HLA-DRA
GO:0002478	antigen processing and presentation of exogenous peptide antigen	35	6.81468e-22	HLA-DPA1, HLA-DOA, HLA-DPB1, HLA-DQA1, HLA-H, TAP2, PSME1, TAP1, PSME2, CD74, PSMB8, HLA-C, HLA-B, HLA-DMB, B2M, HLA-DMA, HLA-F, HLA-A, HLA-DRB1, HLA-DRA, PSMB9
GO:0019884	antigen processing and presentation of exogenous antigen	35	7.05891e-22	HLA-DPA1, HLA-DOA, HLA-DPB1, HLA-DQA1, HLA-H, TAP2, PSME1, TAP1, PSME2, CD74, PSMB8, HLA-C, HLA-B, HLA-DMB, B2M, HLA-DMA, HLA-F, HLA-A, HLA-DRB1, HLA-DRA, PSMB9
GO:0071346	cellular response to interferon-gamma	30	2.32778e-21	HLA-DPA1, HLA-DPB1, HLA-DQA1, HLA-H, GBP1, STAT1, IRF9, CIITA, NMI, HLA-C, HLA-B, IRF1, B2M, NLRC5, HLA-F, HLA-A, HLA-DRB1, HLA-DRA
GO:0048002	antigen processing and presentation of peptide antigen	35	2.62695e-21	HLA-DPA1, HLA-DOA, HLA-DPB1, HLA-DQA1, HLA-H, TAP2, PSME1, TAP1, PSME2, CD74, PSMB8, HLA-C, HLA-B, HLA-DMB, B2M, HLA-DMA, HLA-F, HLA-A, HLA-DRB1, HLA-DRA, PSMB9
GO:0019882	antigen processing and presentation	35	2.92167e-20	HLA-DPA1, HLA-DOA, HLA-DPB1, HLA-DQA1, HLA-H, TAP2, PSME1, TAP1, PSME2, CD74, PSMB8, HLA-C, HLA-B, HLA-DMB, B2M, HLA-DMA, HLA-F, HLA-A, HLA-DRB1, HLA-DRA, PSMB9
GO:0034341	response to interferon-gamma	30	3.16441e-20	HLA-DPA1, HLA-DPB1, HLA-DQA1, HLA-H, GBP1, STAT1, IRF9, CIITA, NMI, HLA-C, HLA-B, IRF1, B2M, NLRC5, HLA-F, HLA-A, HLA-DRB1, HLA-DRA
GO:0019221	cytokine-mediated signaling pathway	41.6667	9.35994e-20	STAT1, IFIT3, HLA-C, IRF1, HLA-B, HLA-F, HLA-A, PSMB9, HLA-DPA1, IFI35, HLA-DPB1, HLA-DQA1, HLA-H, GBP1, PSME1, IRF9, PSME2, CD74, PSMB8, CIITA, NMI, B2M, NLRC5, HLA-DRB1, HLA-DRA
GO:0045087	innate immune response	43.3333	4.88799e-18	STAT1, IFIT3, HLA-C, IRF1, HLA-B, HLA-F, HLA-A, PSMB9, APOL1, HLA-DPA1, IFI35, HLA-DPB1, HLA-DQA1, HLA-H, GBP1, PSME1, PSME2, IRF9, PSMB8, PARP9, CIITA, NMI, B2M, NLRC5, HLA-DRB1, HLA-DRA
GO:0006952	defense response	50	7.92269e-17	STAT1, TAP1, BATF2, IFIT3, HLA-C, HLA-B, IRF1, HLA-F, HLA-A, PSMB9, APOL1, HLA-DPA1, IFI35, HLA-DPB1, HLA-DQA1, GBP1, HLA-H, HCP5, PSME1, PSME2, IRF9, CD74, PSMB8, PARP9, CIITA, NMI, B2M, NLRC5, HLA-DRB1, HLA-DRA
GO:0071345	cellular response to cytokine stimulus	41.6667	8.13858e-17	STAT1, IFIT3, HLA-C, IRF1, HLA-B, HLA-F, HLA-A, PSMB9, HLA-DPA1, IFI35, HLA-DPB1, HLA-DQA1, HLA-H, GBP1, PSME1, IRF9, PSME2, CD74, PSMB8, CIITA, NMI, B2M, NLRC5, HLA-DRB1, HLA-DRA
GO:0002682	regulation of immune system process	50	1.15763e-16	HLA-DOA, STAT1, TAP2, TAP1, IGF2, HLA-C, HLA-B, IRF1, HLA-DMB, HLA-F, HLA-A, PSMB9, HLA-DPA1, HLA-DPB1, HLA-DQA1, GBP1, HLA-H, BTN3A1, PSME1, FLT3LG, PSME2, CD74, PSMB8, PARP9, LIME1, NMI, B2M, NLRC5, HLA-DRB1, HLA-DRA
GO:0034097	response to cytokine	43.3333	1.2023e-16	STAT1, IFIT3, HLA-C, IRF1, HLA-B, HLA-F, HLA-A, PSMB9, HLA-DPA1, IFI35, HLA-DPB1, HLA-DQA1, HLA-H, GBP1, PSME1, PSME2, IRF9, CD74, PSMB8, PARP9, CIITA, NMI, B2M, NLRC5, HLA-DRB1, HLA-DRA
GO:0050776	regulation of immune response	41.6667	1.13696e-15	STAT1, HLA-C, IRF1, HLA-B, HLA-DMB, HLA-F, HLA-A, PSMB9, HLA-DPA1, HLA-DPB1, HLA-DQA1, GBP1, HLA-H, BTN3A1, PSME1, PSME2, CD74, PSMB8, PARP9, NMI, LIME1, B2M, NLRC5, HLA-DRB1, HLA-DRA
GO:0060337	type I interferon signaling pathway	20	2.27152e-13	IFI35, HLA-H, STAT1, IFIT3, HLA-C, HLA-B, IRF1, NLRC5, IRF9, HLA-F, HLA-A, PSMB8
GO:0071357	cellular response to type I interferon	20	2.27152e-13	IFI35, HLA-H, STAT1, IFIT3, HLA-C, HLA-B, IRF1, NLRC5, IRF9, HLA-F, HLA-A, PSMB8
GO:0034340	response to type I interferon	20	4.27658e-13	IFI35, HLA-H, STAT1, IFIT3, HLA-C, HLA-B, IRF1, NLRC5, IRF9, HLA-F, HLA-A, PSMB8
GO:0002684	positive regulation of immune system process	38.3333	1.32694e-12	HLA-DPA1, HLA-DPB1, HLA-DQA1, GBP1, BTN3A1, TAP2, PSME1, FLT3LG, PSME2, TAP1, CD74, PSMB8, IGF2, LIME1, HLA-B, IRF1, HLA-DMB, B2M, NLRC5, HLA-A, HLA-DRB1, HLA-DRA, PSMB9
GO:0002474	antigen processing and presentation of peptide antigen via MHC class I	20	3.44346e-11	HLA-H, HLA-C, TAP2, HLA-B, PSME1, B2M, PSME2, TAP1, HLA-F, HLA-A, PSMB9, PSMB8
GO:0050778	positive regulation of immune response	31.6667	6.334e-11	HLA-DPA1, HLA-DPB1, HLA-DQA1, GBP1, BTN3A1, PSME1, PSME2, CD74, PSMB8, LIME1, HLA-B, IRF1, HLA-DMB, B2M, NLRC5, HLA-A, HLA-DRB1, HLA-DRA, PSMB9
GO:0002479	antigen processing and presentation of exogenous peptide antigen via MHC class I, TAP-dependent	16.6667	8.70859e-10	HLA-H, HLA-C, HLA-B, PSME1, B2M, PSME2, HLA-F, HLA-A, PSMB9, PSMB8
GO:0042590	antigen processing and presentation of exogenous peptide antigen via MHC class I	16.6667	1.37499e-09	HLA-H, HLA-C, HLA-B, PSME1, B2M, PSME2, HLA-F, HLA-A, PSMB9, PSMB8
GO:0019883	antigen processing and presentation of endogenous antigen	11.6667	2.30382e-09	HLA-C, TAP2, HLA-B, B2M, TAP1, CD74, HLA-A
GO:0050852	T cell receptor signaling pathway	20	4.52142e-09	HLA-DPA1, HLA-DPB1, HLA-DQA1, GBP1, BTN3A1, LIME1, PSME1, PSME2, HLA-DRB1, PSMB9, PSMB8, HLA-DRA
GO:0071310	cellular response to organic substance	48.3333	1.00068e-08	STAT1, IGF2, IFIT3, HLA-C, PDE3A, HLA-B, IRF1, HLA-F, HLA-A, PSMB9, HLA-DPA1, IFI35, HLA-DPB1, HLA-DQA1, GBP1, HLA-H, PSME1, PSME2, IRF9, CD74, PSMB8, RPS6KA2, CMPK2, CIITA, NMI, B2M, NLRC5, HLA-DRB1, HLA-DRA
GO:0050851	antigen receptor-mediated signaling pathway	20	1.5026e-08	HLA-DPA1, HLA-DPB1, HLA-DQA1, GBP1, BTN3A1, LIME1, PSME1, PSME2, HLA-DRB1, PSMB9, PSMB8, HLA-DRA
GO:0002480	antigen processing and presentation of exogenous peptide antigen via MHC class I, TAP-independent	10	2.92941e-08	HLA-H, HLA-C, HLA-B, B2M, HLA-F, HLA-A
GO:0007166	cell surface receptor signaling pathway	48.3333	6.95942e-08	STAT1, IGF2, IFIT3, HLA-C, HLA-B, IRF1, HLA-F, HLA-A, PSMB9, HLA-DPA1, IFI35, HLA-DPB1, HLA-DQA1, GBP1, HLA-H, BTN3A1, PSME1, PSME2, IRF9, CD74, PSMB8, DLK1, CIITA, LIME1, NMI, B2M, NLRC5, HLA-DRB1, HLA-DRA
GO:0010033	response to organic substance	51.6667	9.12285e-08	GJD3, STAT1, IGF2, IFIT3, HLA-C, PDE3A, HLA-B, IRF1, HLA-F, HLA-A, PSMB9, HLA-DPA1, IFI35, HLA-DPB1, HLA-DQA1, GBP1, HLA-H, PSME1, PSME2, IRF9, CD74, PSMB8, RPS6KA2, PARP9, CMPK2, CIITA, NMI, B2M, NLRC5, HLA-DRB1, HLA-DRA
GO:0019885	antigen processing and presentation of endogenous peptide antigen via MHC class I	10	9.58695e-08	HLA-C, TAP2, HLA-B, B2M, TAP1, HLA-A
GO:0042110	T cell activation	21.6667	1.37858e-07	HLA-DPA1, HLA-DPB1, HLA-DOA, HLA-DQA1, BTN3A1, CD74, IGF2, IRF1, HLA-DMB, B2M, HLA-DRB1, HLA-A, HLA-DRA
GO:0070489	T cell aggregation	21.6667	1.37858e-07	HLA-DPA1, HLA-DPB1, HLA-DOA, HLA-DQA1, BTN3A1, CD74, IGF2, IRF1, HLA-DMB, B2M, HLA-DRB1, HLA-A, HLA-DRA
GO:0071593	lymphocyte aggregation	21.6667	1.40335e-07	HLA-DPA1, HLA-DPB1, HLA-DOA, HLA-DQA1, BTN3A1, CD74, IGF2, IRF1, HLA-DMB, B2M, HLA-DRB1, HLA-A, HLA-DRA
GO:0002483	antigen processing and presentation of endogenous peptide antigen	10	1.48787e-07	HLA-C, TAP2, HLA-B, B2M, TAP1, HLA-A
GO:0070486	leukocyte aggregation	21.6667	1.53035e-07	HLA-DPA1, HLA-DPB1, HLA-DOA, HLA-DQA1, BTN3A1, CD74, IGF2, IRF1, HLA-DMB, B2M, HLA-DRB1, HLA-A, HLA-DRA
GO:0019886	antigen processing and presentation of exogenous peptide antigen via MHC class II	15	1.73538e-07	HLA-DPA1, HLA-DOA, HLA-DPB1, HLA-DQA1, HLA-DMB, HLA-DMA, CD74, HLA-DRB1, HLA-DRA
GO:0002495	antigen processing and presentation of peptide antigen via MHC class II	15	2.11393e-07	HLA-DPA1, HLA-DOA, HLA-DPB1, HLA-DQA1, HLA-DMB, HLA-DMA, CD74, HLA-DRB1, HLA-DRA
GO:0002504	antigen processing and presentation of peptide or polysaccharide antigen via MHC class II	15	2.29648e-07	HLA-DPA1, HLA-DOA, HLA-DPB1, HLA-DQA1, HLA-DMB, HLA-DMA, CD74, HLA-DRB1, HLA-DRA
GO:0050863	regulation of T cell activation	18.3333	2.59126e-07	HLA-DPA1, HLA-DOA, IGF2, HLA-DPB1, HLA-DQA1, IRF1, HLA-DMB, CD74, HLA-A, HLA-DRB1, HLA-DRA
GO:0002250	adaptive immune response	18.3333	2.69404e-07	BTN3A2, BTN3A1, LIME1, TAP2, HLA-B, B2M, TAP1, CD74, HLA-A, HLA-DRB1, BTN3A3
GO:0070887	cellular response to chemical stimulus	48.3333	2.85838e-07	STAT1, IGF2, IFIT3, HLA-C, PDE3A, HLA-B, IRF1, HLA-F, HLA-A, PSMB9, HLA-DPA1, IFI35, HLA-DPB1, HLA-DQA1, GBP1, HLA-H, PSME1, PSME2, IRF9, CD74, PSMB8, RPS6KA2, CMPK2, CIITA, NMI, B2M, NLRC5, HLA-DRB1, HLA-DRA
GO:0007159	leukocyte cell-cell adhesion	21.6667	2.94392e-07	HLA-DPA1, HLA-DPB1, HLA-DOA, HLA-DQA1, BTN3A1, CD74, IGF2, IRF1, HLA-DMB, B2M, HLA-DRB1, HLA-A, HLA-DRA
GO:0001816	cytokine production	25	3.01887e-07	HLA-DPA1, HLA-DPB1, GBP1, BTN3A2, BTN3A1, UBA7, UBE2L6, CD74, NMI, HLA-B, IRF1, B2M, NLRC5, HLA-A, HLA-DRB1
GO:1903037	regulation of leukocyte cell-cell adhesion	18.3333	3.57132e-07	HLA-DPA1, HLA-DOA, IGF2, HLA-DPB1, HLA-DQA1, IRF1, HLA-DMB, CD74, HLA-A, HLA-DRB1, HLA-DRA
GO:0051249	regulation of lymphocyte activation	20	3.60704e-07	HLA-DPA1, HLA-DOA, IGF2, HLA-DPB1, HLA-DQA1, IRF1, HLA-DMB, FLT3LG, CD74, HLA-A, HLA-DRB1, HLA-DRA
GO:0002429	immune response-activating cell surface receptor signaling pathway	20	3.7117e-07	HLA-DPA1, HLA-DPB1, HLA-DQA1, GBP1, BTN3A1, LIME1, PSME1, PSME2, HLA-DRB1, PSMB9, PSMB8, HLA-DRA
GO:0002484	antigen processing and presentation of endogenous peptide antigen via MHC class I via ER pathway	8.33333	4.06283e-07	HLA-C, TAP2, HLA-B, TAP1, HLA-A
GO:0045321	leukocyte activation	25	4.31572e-07	HLA-DPA1, HLA-DOA, HLA-DPB1, HLA-DQA1, BTN3A1, FLT3LG, CD74, BATF2, IGF2, IRF1, HLA-DMB, B2M, HLA-DRB1, HLA-A, HLA-DRA
GO:0046649	lymphocyte activation	23.3333	5.79888e-07	HLA-DPA1, HLA-DOA, HLA-DPB1, HLA-DQA1, BTN3A1, FLT3LG, CD74, IGF2, IRF1, HLA-DMB, B2M, HLA-DRB1, HLA-A, HLA-DRA
GO:0002768	immune response-regulating cell surface receptor signaling pathway	20	1.02793e-06	HLA-DPA1, HLA-DPB1, HLA-DQA1, GBP1, BTN3A1, LIME1, PSME1, PSME2, HLA-DRB1, PSMB9, PSMB8, HLA-DRA
GO:0070661	leukocyte proliferation	16.6667	1.28976e-06	HLA-DPA1, IGF2, HLA-DPB1, BTN3A1, IRF1, HLA-DMB, FLT3LG, CD74, HLA-A, HLA-DRB1
GO:0002757	immune response-activating signal transduction	21.6667	1.38054e-06	HLA-DPA1, HLA-DPB1, HLA-DQA1, GBP1, BTN3A1, LIME1, IRF1, PSME1, PSME2, HLA-DRB1, PSMB9, HLA-DRA, PSMB8
GO:0002694	regulation of leukocyte activation	20	1.50667e-06	HLA-DPA1, HLA-DOA, IGF2, HLA-DPB1, HLA-DQA1, IRF1, HLA-DMB, FLT3LG, CD74, HLA-A, HLA-DRB1, HLA-DRA
GO:0051251	positive regulation of lymphocyte activation	16.6667	1.66968e-06	HLA-DPA1, IGF2, HLA-DPB1, HLA-DQA1, HLA-DMB, FLT3LG, CD74, HLA-A, HLA-DRB1, HLA-DRA
GO:0070663	regulation of leukocyte proliferation	15	1.88453e-06	HLA-DPA1, IGF2, HLA-DPB1, IRF1, HLA-DMB, FLT3LG, CD74, HLA-A, HLA-DRB1
GO:0050870	positive regulation of T cell activation	15	2.15866e-06	HLA-DPA1, IGF2, HLA-DPB1, HLA-DQA1, HLA-DMB, CD74, HLA-A, HLA-DRB1, HLA-DRA
GO:0022407	regulation of cell-cell adhesion	18.3333	2.54185e-06	HLA-DPA1, HLA-DOA, IGF2, HLA-DPB1, HLA-DQA1, IRF1, HLA-DMB, CD74, HLA-A, HLA-DRB1, HLA-DRA
GO:1903039	positive regulation of leukocyte cell-cell adhesion	15	2.60901e-06	HLA-DPA1, IGF2, HLA-DPB1, HLA-DQA1, HLA-DMB, CD74, HLA-A, HLA-DRB1, HLA-DRA
GO:0002764	immune response-regulating signaling pathway	21.6667	2.77711e-06	HLA-DPA1, HLA-DPB1, HLA-DQA1, GBP1, BTN3A1, LIME1, IRF1, PSME1, PSME2, HLA-DRB1, PSMB9, HLA-DRA, PSMB8
GO:0002253	activation of immune response	21.6667	3.02588e-06	HLA-DPA1, HLA-DPB1, HLA-DQA1, GBP1, BTN3A1, LIME1, IRF1, PSME1, PSME2, HLA-DRB1, PSMB9, HLA-DRA, PSMB8
GO:0050865	regulation of cell activation	20	3.09675e-06	HLA-DPA1, HLA-DOA, IGF2, HLA-DPB1, HLA-DQA1, IRF1, HLA-DMB, FLT3LG, CD74, HLA-A, HLA-DRB1, HLA-DRA
GO:0002696	positive regulation of leukocyte activation	16.6667	3.12626e-06	HLA-DPA1, IGF2, HLA-DPB1, HLA-DQA1, HLA-DMB, FLT3LG, CD74, HLA-A, HLA-DRB1, HLA-DRA
GO:0002252	immune effector process	23.3333	3.59846e-06	GBP1, STAT1, BTN3A2, IRF9, CD74, BTN3A3, IFIT3, IRF1, HLA-B, HLA-DMB, B2M, NLRC5, HLA-DRB1, HLA-A
GO:0050867	positive regulation of cell activation	16.6667	3.99045e-06	HLA-DPA1, IGF2, HLA-DPB1, HLA-DQA1, HLA-DMB, FLT3LG, CD74, HLA-A, HLA-DRB1, HLA-DRA
GO:0001775	cell activation	25	5.74564e-06	HLA-DPA1, HLA-DOA, HLA-DPB1, HLA-DQA1, BTN3A1, FLT3LG, CD74, BATF2, IGF2, IRF1, HLA-DMB, B2M, HLA-DRB1, HLA-A, HLA-DRA
GO:0001817	regulation of cytokine production	21.6667	5.83717e-06	HLA-DPA1, HLA-DPB1, GBP1, UBA7, UBE2L6, CD74, NMI, IRF1, HLA-B, B2M, NLRC5, HLA-A, HLA-DRB1
GO:0022409	positive regulation of cell-cell adhesion	15	5.92046e-06	HLA-DPA1, IGF2, HLA-DPB1, HLA-DQA1, HLA-DMB, CD74, HLA-A, HLA-DRB1, HLA-DRA
GO:0046651	lymphocyte proliferation	15	7.51415e-06	HLA-DPA1, IGF2, HLA-DPB1, BTN3A1, IRF1, HLA-DMB, CD74, HLA-A, HLA-DRB1
GO:0032943	mononuclear cell proliferation	15	8.37566e-06	HLA-DPA1, IGF2, HLA-DPB1, BTN3A1, IRF1, HLA-DMB, CD74, HLA-A, HLA-DRB1
GO:0098602	single organism cell adhesion	23.3333	1.03614e-05	HLA-DPA1, HLA-DOA, HLA-DPB1, HLA-DQA1, GBP1, BTN3A1, CD74, IGF2, IRF1, HLA-DMB, B2M, HLA-DRB1, HLA-A, HLA-DRA
GO:0042098	T cell proliferation	13.3333	1.08324e-05	HLA-DPA1, IGF2, HLA-DPB1, BTN3A1, IRF1, HLA-DMB, HLA-A, HLA-DRB1
GO:0002503	peptide antigen assembly with MHC class II protein complex	6.66667	1.36077e-05	HLA-DMB, HLA-DMA, HLA-DRB1, HLA-DRA
GO:0002399	MHC class II protein complex assembly	6.66667	1.36077e-05	HLA-DMB, HLA-DMA, HLA-DRB1, HLA-DRA
GO:0045088	regulation of innate immune response	18.3333	1.44725e-05	PARP9, STAT1, NMI, HLA-B, IRF1, PSME1, NLRC5, PSME2, HLA-A, PSMB9, PSMB8
GO:0050670	regulation of lymphocyte proliferation	13.3333	1.62435e-05	HLA-DPA1, IGF2, HLA-DPB1, IRF1, HLA-DMB, CD74, HLA-A, HLA-DRB1
GO:0032944	regulation of mononuclear cell proliferation	13.3333	1.72119e-05	HLA-DPA1, IGF2, HLA-DPB1, IRF1, HLA-DMB, CD74, HLA-A, HLA-DRB1
GO:0070665	positive regulation of leukocyte proliferation	11.6667	2.03371e-05	HLA-DPA1, IGF2, HLA-DPB1, HLA-DMB, FLT3LG, CD74, HLA-A
GO:0030155	regulation of cell adhesion	21.6667	2.05343e-05	HLA-DPA1, HLA-DOA, IGF2, HLA-DPB1, HLA-DQA1, GBP1, SPOCK2, IRF1, HLA-DMB, CD74, HLA-A, HLA-DRB1, HLA-DRA
GO:0016337	single organismal cell-cell adhesion	21.6667	2.11099e-05	HLA-DPA1, HLA-DPB1, HLA-DOA, HLA-DQA1, BTN3A1, CD74, IGF2, IRF1, HLA-DMB, B2M, HLA-DRB1, HLA-A, HLA-DRA
GO:0002501	peptide antigen assembly with MHC protein complex	6.66667	3.08458e-05	HLA-DMB, HLA-DMA, HLA-DRB1, HLA-DRA
GO:0032609	interferon-gamma production	10	4.03838e-05	HLA-DPA1, HLA-DPB1, BTN3A2, BTN3A1, HLA-A, HLA-DRB1
GO:0042129	regulation of T cell proliferation	11.6667	4.70858e-05	HLA-DPA1, IGF2, HLA-DPB1, IRF1, HLA-DMB, HLA-A, HLA-DRB1
GO:0045785	positive regulation of cell adhesion	16.6667	5.42841e-05	HLA-DPA1, IGF2, HLA-DPB1, HLA-DQA1, SPOCK2, HLA-DMB, CD74, HLA-A, HLA-DRB1, HLA-DRA
GO:0002396	MHC protein complex assembly	6.66667	5.84535e-05	HLA-DMB, HLA-DMA, HLA-DRB1, HLA-DRA
GO:0031347	regulation of defense response	20	0.000153934	PARP9, STAT1, NMI, HLA-B, IRF1, PSME1, B2M, NLRC5, PSME2, HLA-A, PSMB9, PSMB8
GO:0051707	response to other organism	20	0.000201521	BATF2, CMPK2, GBP1, STAT1, IFIT3, HLA-B, IRF1, B2M, NLRC5, IRF9, HLA-A, HLA-DRB1
GO:0043207	response to external biotic stimulus	20	0.000201521	BATF2, CMPK2, GBP1, STAT1, IFIT3, HLA-B, IRF1, B2M, NLRC5, IRF9, HLA-A, HLA-DRB1
GO:0051607	defense response to virus	13.3333	0.0002257	GBP1, STAT1, IFIT3, IRF1, B2M, NLRC5, IRF9, HLA-A
GO:0002577	regulation of antigen processing and presentation	6.66667	0.000231351	HLA-DOA, TAP2, TAP1, CD74
GO:0098542	defense response to other organism	15	0.000234706	BATF2, GBP1, STAT1, IFIT3, IRF1, B2M, NLRC5, IRF9, HLA-A
GO:0050671	positive regulation of lymphocyte proliferation	10	0.000266598	HLA-DPA1, IGF2, HLA-DPB1, HLA-DMB, CD74, HLA-A
GO:0032946	positive regulation of mononuclear cell proliferation	10	0.000286814	HLA-DPA1, IGF2, HLA-DPB1, HLA-DMB, CD74, HLA-A
GO:0048584	positive regulation of response to stimulus	33.3333	0.000317905	HLA-DPA1, HLA-DPB1, HLA-DQA1, GBP1, BTN3A1, PSME1, PSME2, CD74, PSMB8, IGF2, LIME1, HLA-B, IRF1, HLA-DMB, B2M, NLRC5, HLA-A, HLA-DRB1, HLA-DRA, PSMB9
GO:0009607	response to biotic stimulus	20	0.000353111	BATF2, CMPK2, GBP1, STAT1, IFIT3, HLA-B, IRF1, B2M, NLRC5, IRF9, HLA-A, HLA-DRB1
GO:0002449	lymphocyte mediated immunity	11.6667	0.000431138	BTN3A2, HLA-B, B2M, CD74, HLA-A, HLA-DRB1, BTN3A3
GO:0002683	negative regulation of immune system process	15	0.000492546	HLA-DOA, GBP1, NMI, HLA-B, IRF1, NLRC5, CD74, HLA-A, HLA-DRB1
GO:0016032	viral process	25	0.000558008	GBP1, STAT1, TAP2, IRF9, TAP1, PSMB8, IFIT3, HLA-C, IRF1, HLA-B, B2M, NLRC5, HLA-A, HLA-DRA, PSMB9
GO:0002460	adaptive immune response based on somatic recombination of immune receptors built from immunoglobulin superfamily domains	11.6667	0.000567414	BTN3A2, HLA-B, B2M, CD74, HLA-A, HLA-DRB1, BTN3A3
GO:0044764	multi-organism cellular process	25	0.000579864	GBP1, STAT1, TAP2, IRF9, TAP1, PSMB8, IFIT3, HLA-C, IRF1, HLA-B, B2M, NLRC5, HLA-A, HLA-DRA, PSMB9
GO:0044419	interspecies interaction between organisms	25	0.000694286	GBP1, STAT1, TAP2, IRF9, TAP1, PSMB8, IFIT3, HLA-C, IRF1, HLA-B, B2M, NLRC5, HLA-A, HLA-DRA, PSMB9
GO:0044403	symbiosis, encompassing mutualism through parasitism	25	0.000694286	GBP1, STAT1, TAP2, IRF9, TAP1, PSMB8, IFIT3, HLA-C, IRF1, HLA-B, B2M, NLRC5, HLA-A, HLA-DRA, PSMB9
GO:0031295	T cell costimulation	8.33333	0.000913992	HLA-DPA1, HLA-DPB1, HLA-DQA1, HLA-DRB1, HLA-DRA
GO:0031294	lymphocyte costimulation	8.33333	0.000913992	HLA-DPA1, HLA-DPB1, HLA-DQA1, HLA-DRB1, HLA-DRA
GO:0042102	positive regulation of T cell proliferation	8.33333	0.000913992	HLA-DPA1, IGF2, HLA-DPB1, HLA-DMB, HLA-A
GO:0098609	cell-cell adhesion	23.3333	0.00091676	HLA-DPA1, HLA-DOA, HLA-DPB1, HLA-DQA1, STAT1, BTN3A1, CD74, IGF2, IRF1, HLA-DMB, B2M, HLA-DRB1, HLA-A, HLA-DRA
GO:0002456	T cell mediated immunity	8.33333	0.00109382	BTN3A2, HLA-B, B2M, HLA-A, BTN3A3
GO:0002486	antigen processing and presentation of endogenous peptide antigen via MHC class I via ER pathway, TAP-independent	5	0.00135858	HLA-C, HLA-B, HLA-A
GO:0009615	response to virus	13.3333	0.00140453	GBP1, STAT1, IFIT3, IRF1, B2M, NLRC5, IRF9, HLA-A
GO:0002443	leukocyte mediated immunity	11.6667	0.00200186	BTN3A2, HLA-B, B2M, CD74, HLA-A, HLA-DRB1, BTN3A3
GO:0002477	antigen processing and presentation of exogenous peptide antigen via MHC class Ib	5	0.00262794	TAP2, B2M, TAP1
GO:0002481	antigen processing and presentation of exogenous protein antigen via MHC class Ib, TAP-dependent	5	0.00262794	TAP2, B2M, TAP1
GO:0007155	cell adhesion	26.6667	0.00359403	HLA-DPA1, HLA-DOA, HLA-DPB1, HLA-DQA1, SPOCK2, GBP1, STAT1, BTN3A1, CD74, IGF2, IRF1, HLA-DMB, B2M, HLA-A, HLA-DRB1, HLA-DRA
GO:0022610	biological adhesion	26.6667	0.0036386	HLA-DPA1, HLA-DOA, HLA-DPB1, HLA-DQA1, SPOCK2, GBP1, STAT1, BTN3A1, CD74, IGF2, IRF1, HLA-DMB, B2M, HLA-A, HLA-DRB1, HLA-DRA
GO:0002579	positive regulation of antigen processing and presentation	5	0.00423894	TAP2, TAP1, CD74
GO:0002428	antigen processing and presentation of peptide antigen via MHC class Ib	5	0.00423894	TAP2, B2M, TAP1
GO:0016045	detection of bacterium	5	0.00627144	HLA-B, HLA-A, HLA-DRB1
GO:0002583	regulation of antigen processing and presentation of peptide antigen	5	0.00627144	HLA-DOA, TAP2, TAP1
GO:0045824	negative regulation of innate immune response	6.66667	0.00732286	NMI, HLA-B, NLRC5, HLA-A
GO:0002475	antigen processing and presentation via MHC class Ib	5	0.00858084	TAP2, B2M, TAP1
GO:0098543	detection of other organism	5	0.00858084	HLA-B, HLA-A, HLA-DRB1
GO:0032480	negative regulation of type I interferon production	6.66667	0.0096379	NMI, UBA7, UBE2L6, NLRC5
GO:0001916	positive regulation of T cell mediated cytotoxicity	5	0.0111838	HLA-B, B2M, HLA-A
GO:0098581	detection of external biotic stimulus	5	0.0111838	HLA-B, HLA-A, HLA-DRB1
GO:0001818	negative regulation of cytokine production	10	0.0117406	GBP1, NMI, UBA7, UBE2L6, NLRC5, HLA-DRB1
GO:0032649	regulation of interferon-gamma production	6.66667	0.0122254	HLA-DPA1, HLA-DPB1, HLA-A, HLA-DRB1
GO:0009595	detection of biotic stimulus	5	0.013937	HLA-B, HLA-A, HLA-DRB1
GO:0002699	positive regulation of immune effector process	8.33333	0.0149964	HLA-B, HLA-DMB, B2M, CD74, HLA-A
GO:0032606	type I interferon production	8.33333	0.0169302	NMI, UBA7, IRF1, UBE2L6, NLRC5
GO:0032479	regulation of type I interferon production	8.33333	0.0188611	NMI, UBA7, IRF1, UBE2L6, NLRC5
GO:0042127	regulation of cell proliferation	23.3333	0.0189878	HLA-DPA1, HLA-DPB1, STAT1, FLT3LG, CD74, RARRES3, RPS6KA2, IGF2, IFIT3, IRF1, HLA-DMB, ATF5, HLA-DRB1, HLA-A
GO:0001906	cell killing	6.66667	0.019758	APOL1, HLA-B, B2M, HLA-A
GO:0051241	negative regulation of multicellular organismal process	18.3333	0.0199278	CIITA, GBP1, STAT1, NMI, UBA7, IRF1, UBE2L6, B2M, NLRC5, CD74, HLA-DRB1
GO:0033209	tumor necrosis factor-mediated signaling pathway	8.33333	0.0199462	STAT1, PSME1, PSME2, PSMB9, PSMB8
GO:0001914	regulation of T cell mediated cytotoxicity	5	0.0200383	HLA-B, B2M, HLA-A
GO:0046719	regulation by virus of viral protein levels in host cell	5	0.0200383	STAT1, TAP2, TAP1
GO:0080134	regulation of response to stress	21.6667	0.0262172	PARP9, STAT1, NMI, HLA-B, IRF1, B2M, PSME1, PSME2, NLRC5, CD74, HLA-A, PSMB9, PSMB8
GO:0001912	positive regulation of leukocyte mediated cytotoxicity	5	0.0272248	HLA-B, B2M, HLA-A
GO:0006521	regulation of cellular amino acid metabolic process	6.66667	0.0276002	PSME1, PSME2, PSMB9, PSMB8
GO:0008283	cell proliferation	25	0.0347522	HLA-DPA1, HLA-DPB1, STAT1, BTN3A1, FLT3LG, CD74, RARRES3, RPS6KA2, IGF2, IFIT3, IRF1, HLA-DMB, ATF5, HLA-DRB1, HLA-A
GO:0031343	positive regulation of cell killing	5	0.0354036	HLA-B, B2M, HLA-A
GO:0002521	leukocyte differentiation	11.6667	0.036516	BATF2, HLA-DOA, HLA-B, IRF1, FLT3LG, B2M, CD74
GO:0002711	positive regulation of T cell mediated immunity	5	0.0396211	HLA-B, B2M, HLA-A
GO:0033238	regulation of cellular amine metabolic process	6.66667	0.0409954	PSME1, PSME2, PSMB9, PSMB8
GO:0001913	T cell mediated cytotoxicity	5	0.0439789	HLA-B, B2M, HLA-A
GO:0060330	regulation of response to interferon-gamma	5	0.0488206	PARP9, STAT1, NLRC5
GO:0002720	positive regulation of cytokine production involved in immune response	5	0.0488206	B2M, CD74, HLA-A
Gene Ontology:- Cellular Component
GO:0042611	MHC protein complex	25	2.65215e-26	HLA-DPA1, HLA-DOA, HLA-DPB1, HLA-DQA1, HLA-H, CD74, HLA-C, HLA-B, HLA-DMB, B2M, HLA-DMA, HLA-F, HLA-DRB1, HLA-A, HLA-DRA
GO:0042613	MHC class II protein complex	18.3333	1.2729e-19	HLA-DPA1, HLA-DOA, HLA-DPB1, HLA-DQA1, HLA-C, HLA-DMB, HLA-DMA, CD74, HLA-A, HLA-DRB1, HLA-DRA
GO:0098553	lumenal side of endoplasmic reticulum membrane	18.3333	5.55698e-16	HLA-DPA1, HLA-DPB1, HLA-DQA1, HLA-H, HLA-C, HLA-B, HLA-F, CD74, HLA-A, HLA-DRB1, HLA-DRA
GO:0071556	integral component of lumenal side of endoplasmic reticulum membrane	18.3333	5.55698e-16	HLA-DPA1, HLA-DPB1, HLA-DQA1, HLA-H, HLA-C, HLA-B, HLA-F, CD74, HLA-A, HLA-DRB1, HLA-DRA
GO:0012507	ER to Golgi transport vesicle membrane	20	8.21565e-15	HLA-DPA1, HLA-DPB1, HLA-DQA1, HLA-H, HLA-C, HLA-B, B2M, HLA-F, CD74, HLA-A, HLA-DRB1, HLA-DRA
GO:0030134	ER to Golgi transport vesicle	20	3.16636e-13	HLA-DPA1, HLA-DPB1, HLA-DQA1, HLA-H, HLA-C, HLA-B, B2M, HLA-F, CD74, HLA-A, HLA-DRB1, HLA-DRA
GO:0030176	integral component of endoplasmic reticulum membrane	21.6667	2.00413e-11	HLA-DPA1, HLA-DPB1, HLA-DQA1, HLA-H, HLA-C, TAP2, HLA-B, TAP1, HLA-F, CD74, HLA-A, HLA-DRB1, HLA-DRA
GO:0031227	intrinsic component of endoplasmic reticulum membrane	21.6667	2.31165e-11	HLA-DPA1, HLA-DPB1, HLA-DQA1, HLA-H, HLA-C, TAP2, HLA-B, TAP1, HLA-F, CD74, HLA-A, HLA-DRB1, HLA-DRA
GO:0030658	transport vesicle membrane	20	2.38235e-11	HLA-DPA1, HLA-DPB1, HLA-DQA1, HLA-H, HLA-C, HLA-B, B2M, HLA-F, CD74, HLA-A, HLA-DRB1, HLA-DRA
GO:0030662	coated vesicle membrane	20	7.33198e-11	HLA-DPA1, HLA-DPB1, HLA-DQA1, HLA-H, HLA-C, HLA-B, B2M, HLA-F, CD74, HLA-A, HLA-DRB1, HLA-DRA
GO:0030666	endocytic vesicle membrane	20	8.14496e-11	HLA-DPA1, HLA-DPB1, HLA-DQA1, HLA-H, HLA-C, HLA-B, B2M, HLA-F, CD74, HLA-A, HLA-DRB1, HLA-DRA
GO:0030139	endocytic vesicle	20	1.5842e-08	HLA-DPA1, HLA-DPB1, HLA-DQA1, HLA-H, HLA-C, HLA-B, B2M, HLA-F, CD74, HLA-A, HLA-DRB1, HLA-DRA
GO:0030135	coated vesicle	20	1.78224e-08	HLA-DPA1, HLA-DPB1, HLA-DQA1, HLA-H, HLA-C, HLA-B, B2M, HLA-F, CD74, HLA-A, HLA-DRB1, HLA-DRA
GO:0098552	side of membrane	21.6667	1.80192e-08	HLA-DPA1, HLA-DPB1, HLA-DQA1, HLA-H, HLA-C, HLA-B, FLT3LG, B2M, HLA-F, CD74, HLA-A, HLA-DRB1, HLA-DRA
GO:0042612	MHC class I protein complex	10	1.8229e-08	HLA-H, HLA-C, HLA-B, B2M, HLA-F, HLA-A
GO:0009986	cell surface	25	5.53991e-08	HLA-DPA1, HLA-DPB1, GJD3, HLA-H, FLT3LG, CD74, CIITA, HLA-C, HLA-B, B2M, HLA-DMA, HLA-F, HLA-A, HLA-DRB1, HLA-DRA
GO:0010008	endosome membrane	23.3333	6.70233e-08	HLA-DPA1, HLA-DPB1, HLA-DOA, HLA-DQA1, HLA-H, HLA-C, HLA-B, HLA-DMB, B2M, HLA-DMA, HLA-F, HLA-DRB1, HLA-A, HLA-DRA
GO:0030133	transport vesicle	20	1.43107e-07	HLA-DPA1, HLA-DPB1, HLA-DQA1, HLA-H, HLA-C, HLA-B, B2M, HLA-F, CD74, HLA-A, HLA-DRB1, HLA-DRA
GO:0044440	endosomal part	23.3333	1.48719e-07	HLA-DPA1, HLA-DPB1, HLA-DOA, HLA-DQA1, HLA-H, HLA-C, HLA-B, HLA-DMB, B2M, HLA-DMA, HLA-F, HLA-DRB1, HLA-A, HLA-DRA
GO:0044437	vacuolar part	26.6667	7.7806e-07	HLA-DPA1, HLA-DOA, HLA-DPB1, HLA-DQA1, HLA-H, RNASET2, CD74, HLA-C, HLA-B, HLA-DMB, B2M, HLA-DMA, HLA-F, HLA-DRB1, HLA-A, HLA-DRA
GO:0005774	vacuolar membrane	25	9.59035e-07	HLA-DPA1, HLA-DOA, HLA-DPB1, HLA-DQA1, HLA-H, CD74, HLA-C, HLA-B, HLA-DMB, B2M, HLA-DMA, HLA-F, HLA-DRB1, HLA-A, HLA-DRA
GO:0044433	cytoplasmic vesicle part	21.6667	3.3991e-06	HLA-DPA1, IGF2, HLA-DPB1, HLA-DQA1, HLA-H, HLA-C, HLA-B, B2M, HLA-F, CD74, HLA-A, HLA-DRB1, HLA-DRA
GO:0030659	cytoplasmic vesicle membrane	20	3.45232e-06	HLA-DPA1, HLA-DPB1, HLA-DQA1, HLA-H, HLA-C, HLA-B, B2M, HLA-F, CD74, HLA-A, HLA-DRB1, HLA-DRA
GO:0030669	clathrin-coated endocytic vesicle membrane	10	4.47947e-06	HLA-DPA1, HLA-DPB1, HLA-DQA1, CD74, HLA-DRB1, HLA-DRA
GO:0012506	vesicle membrane	20	4.87645e-06	HLA-DPA1, HLA-DPB1, HLA-DQA1, HLA-H, HLA-C, HLA-B, B2M, HLA-F, CD74, HLA-A, HLA-DRB1, HLA-DRA
GO:0005768	endosome	25	1.0735e-05	HLA-DPA1, HLA-DOA, HLA-DPB1, HLA-DQA1, HLA-H, CD74, HLA-C, HLA-B, HLA-DMB, B2M, HLA-DMA, HLA-F, HLA-DRB1, HLA-A, HLA-DRA
GO:0045334	clathrin-coated endocytic vesicle	10	1.11144e-05	HLA-DPA1, HLA-DPB1, HLA-DQA1, CD74, HLA-DRB1, HLA-DRA
GO:0030670	phagocytic vesicle membrane	10	2.3337e-05	HLA-H, HLA-C, HLA-B, B2M, HLA-F, HLA-A
GO:0030665	clathrin-coated vesicle membrane	10	4.51314e-05	HLA-DPA1, HLA-DPB1, HLA-DQA1, CD74, HLA-DRB1, HLA-DRA
GO:0000139	Golgi membrane	21.6667	7.58527e-05	HLA-DPA1, HLA-DPB1, HLA-DQA1, HLA-H, GBP1, CD74, HLA-C, HLA-B, B2M, HLA-F, HLA-DRB1, HLA-A, HLA-DRA
GO:0032588	trans-Golgi network membrane	10	0.00011353	HLA-DPA1, HLA-DPB1, HLA-DQA1, CD74, HLA-DRB1, HLA-DRA
GO:0045335	phagocytic vesicle	10	0.00011353	HLA-H, HLA-C, HLA-B, B2M, HLA-F, HLA-A
GO:0005765	lysosomal membrane	15	0.000168643	HLA-DPA1, HLA-DOA, HLA-DPB1, HLA-DQA1, HLA-DMB, HLA-DMA, CD74, HLA-DRB1, HLA-DRA
GO:0098852	lytic vacuole membrane	15	0.000168643	HLA-DPA1, HLA-DOA, HLA-DPB1, HLA-DQA1, HLA-DMB, HLA-DMA, CD74, HLA-DRB1, HLA-DRA
GO:0005773	vacuole	26.6667	0.000172139	HLA-DPA1, HLA-DOA, HLA-DPB1, HLA-DQA1, HLA-H, RNASET2, CD74, HLA-C, HLA-B, HLA-DMB, B2M, HLA-DMA, HLA-F, HLA-DRB1, HLA-A, HLA-DRA
GO:0044432	endoplasmic reticulum part	25	0.000343375	HLA-DPA1, HLA-DPB1, HLA-DQA1, HLA-H, TAP2, RNASET2, TAP1, CD74, HLA-C, HLA-B, B2M, HLA-F, HLA-A, HLA-DRB1, HLA-DRA
GO:0031901	early endosome membrane	10	0.000448105	HLA-H, HLA-C, HLA-B, B2M, HLA-F, HLA-A
GO:0044431	Golgi apparatus part	21.6667	0.000480978	HLA-DPA1, HLA-DPB1, HLA-DQA1, HLA-H, GBP1, CD74, HLA-C, HLA-B, B2M, HLA-F, HLA-DRB1, HLA-A, HLA-DRA
GO:0000323	lytic vacuole	16.6667	0.00104026	HLA-DPA1, HLA-DOA, HLA-DPB1, HLA-DQA1, RNASET2, HLA-DMB, HLA-DMA, CD74, HLA-DRB1, HLA-DRA
GO:0005764	lysosome	16.6667	0.00104026	HLA-DPA1, HLA-DOA, HLA-DPB1, HLA-DQA1, RNASET2, HLA-DMB, HLA-DMA, CD74, HLA-DRB1, HLA-DRA
GO:0030136	clathrin-coated vesicle	10	0.00105961	HLA-DPA1, HLA-DPB1, HLA-DQA1, CD74, HLA-DRB1, HLA-DRA
GO:0005789	endoplasmic reticulum membrane	21.6667	0.00114839	HLA-DPA1, HLA-DPB1, HLA-DQA1, HLA-H, HLA-C, TAP2, HLA-B, TAP1, HLA-F, CD74, HLA-A, HLA-DRB1, HLA-DRA
GO:0016023	cytoplasmic, membrane-bounded vesicle	21.6667	0.00128543	HLA-DPA1, IGF2, HLA-DPB1, HLA-DQA1, HLA-H, HLA-C, HLA-B, B2M, HLA-F, CD74, HLA-A, HLA-DRB1, HLA-DRA
GO:0042175	nuclear outer membrane-endoplasmic reticulum membrane network	21.6667	0.00131725	HLA-DPA1, HLA-DPB1, HLA-DQA1, HLA-H, HLA-C, TAP2, HLA-B, TAP1, HLA-F, CD74, HLA-A, HLA-DRB1, HLA-DRA
GO:0005802	trans-Golgi network	10	0.00572387	HLA-DPA1, HLA-DPB1, HLA-DQA1, CD74, HLA-DRB1, HLA-DRA
GO:0098791	Golgi subcompartment	11.6667	0.00585174	HLA-DPA1, HLA-DPB1, HLA-DQA1, CD74, HLA-A, HLA-DRB1, HLA-DRA
GO:0005783	endoplasmic reticulum	25	0.00669328	HLA-DPA1, HLA-DPB1, HLA-DQA1, HLA-H, TAP2, RNASET2, TAP1, CD74, HLA-C, HLA-B, B2M, HLA-F, HLA-A, HLA-DRB1, HLA-DRA
GO:0031226	intrinsic component of plasma membrane	18.3333	0.00728516	HLA-DPA1, GJD3, HLA-DQA1, HLA-H, HLA-C, HLA-B, FLT3LG, TAP1, HLA-A, HLA-DRB1, HLA-DRA
GO:0031984	organelle subcompartment	11.6667	0.00779814	HLA-DPA1, HLA-DPB1, HLA-DQA1, CD74, HLA-A, HLA-DRB1, HLA-DRA
GO:0005794	Golgi apparatus	23.3333	0.00993362	HLA-DPA1, HLA-DPB1, HLA-DQA1, HLA-H, GBP1, CD74, BTN3A3, HLA-C, HLA-B, B2M, HLA-F, HLA-A, HLA-DRB1, HLA-DRA
GO:0000502	proteasome complex	6.66667	0.0142605	PSME1, PSME2, PSMB9, PSMB8
GO:0005887	integral component of plasma membrane	16.6667	0.0162029	HLA-DPA1, GJD3, HLA-DQA1, HLA-H, HLA-C, HLA-B, TAP1, HLA-A, HLA-DRB1, HLA-DRA
GO:0005769	early endosome	10	0.0243504	HLA-H, HLA-C, HLA-B, B2M, HLA-F, HLA-A
GO:0031902	late endosome membrane	6.66667	0.0383256	HLA-DMB, HLA-DMA, HLA-DRB1, HLA-DRA
GO:0009897	external side of plasma membrane	6.66667	0.0386585	FLT3LG, B2M, CD74, HLA-DRB1
GO:0005770	late endosome	8.33333	0.0415996	HLA-DMB, HLA-DMA, CD74, HLA-DRB1, HLA-DRA
GO:0008537	proteasome activator complex	3.33333	0.0430609	PSME1, PSME2
GO:0042825	TAP complex	3.33333	0.0430609	TAP2, TAP1
Gene Ontology:- Molecular Function
GO:0003823	antigen binding	25	3.88783e-20	HLA-DPA1, HLA-DOA, HLA-DPB1, HLA-DQA1, HLA-H, TAP1, CD74, HLA-C, HLA-B, HLA-DMB, HLA-DMA, HLA-F, HLA-DRB1, HLA-A, HLA-DRA
GO:0042605	peptide antigen binding	16.6667	2.76446e-14	HLA-DPA1, HLA-DPB1, HLA-DQA1, HLA-C, HLA-B, TAP1, HLA-F, HLA-A, HLA-DRB1, HLA-DRA
GO:0032395	MHC class II receptor activity	13.3333	2.48801e-13	HLA-DPA1, HLA-DOA, HLA-DPB1, HLA-DQA1, HLA-C, HLA-DMA, HLA-DRB1, HLA-DRA
GO:0046977	TAP binding	10	4.70618e-09	HLA-C, TAP2, HLA-B, TAP1, HLA-F, HLA-A
GO:0042277	peptide binding	18.3333	1.49905e-07	HLA-DPA1, HLA-DPB1, HLA-DQA1, HLA-C, HLA-B, TAP1, HLA-F, CD74, HLA-A, HLA-DRB1, HLA-DRA
GO:0033218	amide binding	18.3333	2.4238e-07	HLA-DPA1, HLA-DPB1, HLA-DQA1, HLA-C, HLA-B, TAP1, HLA-F, CD74, HLA-A, HLA-DRB1, HLA-DRA
GO:0023026	MHC class II protein complex binding	10	2.49233e-07	HLA-DOA, HLA-DMB, HLA-DMA, CD74, HLA-DRB1, HLA-DRA
GO:0023023	MHC protein complex binding	10	2.49233e-07	HLA-DOA, HLA-DMB, HLA-DMA, CD74, HLA-DRB1, HLA-DRA
GO:0004888	transmembrane signaling receptor activity	15	0.00311511	HLA-DPA1, HLA-DOA, HLA-DPB1, HLA-DQA1, HLA-C, HLA-DMA, CD74, HLA-DRB1, HLA-DRA
GO:0046978	TAP1 binding	5	0.00418153	TAP2, TAP1, HLA-F
GO:0099600	transmembrane receptor activity	15	0.00459185	HLA-DPA1, HLA-DOA, HLA-DPB1, HLA-DQA1, HLA-C, HLA-DMA, CD74, HLA-DRB1, HLA-DRA
GO:0038023	signaling receptor activity	15	0.00848346	HLA-DPA1, HLA-DOA, HLA-DPB1, HLA-DQA1, HLA-C, HLA-DMA, CD74, HLA-DRB1, HLA-DRA

## Sheet: M3
Term ID	Term description	Genes in term (%)	P-value (BH-corrected)	Module genes in term
Gene Ontology:- Biological Process
No enriched terms
Gene Ontology:- Cellular Component
GO:0005773	vacuole	11.9403	0.000156304	LRPAP1, SNAP29, TMBIM1, GGA1, BECN1, ARSG, ATP6AP1, PTP4A3, NUCB1, HGS, CLCN7, PLBD2, SDCCAG3, AP3B1, TUBG1, VPS26B, MAP3K7, VPS28, MVB12A, AP1B1, SMPD1, AP2A1, SLC48A1, ZNRF1, DYSF, SLC44A2, LLGL1, CAPN1, SH3GLB1, FLOT2, EEF1A2, GNA11, PLIN3, DNM2, ANXA11, GNB2, ABCA2, TRAF3, VOPP1, TBC1D25, CD320, SIAH2, ARSB, RAB11B, STX4, ABCG1, PACSIN3, DSCR3, ANKRD13B, SLC40A1, KIAA0196, ATP9A, FLOT1, LOH12…
GO:0005768	endosome	8.25871	0.00421377	LRPAP1, GGA1, TMBIM1, GPR107, TNFAIP1, GPC1, BECN1, ARF6, MICALL1, PLEKHM2, YKT6, TMEM184A, UBAP1, ATP6AP1, PTP4A3, ATP13A2, NUCB1, HGS, ZNRF2, ERBB2, SDCCAG3, CHMP1A, VAC14, TUBG1, ABCB6, VPS26B, MAP3K7, ANXA6, VPS28, MVB12A, RAPGEF1, SMPD1, ATP6V0D1, ARF1, RFFL, AP2A1, SLC48A1, ZNRF1, RAC1, SNX8, DYSF, LLGL1, TOM1, FLOT2, ATP6V0E2, PLIN3, DNM2, PTP4A2, ATG9A, ARL8A, ABCA2, TRAF3, VOPP1, CHID1, …
GO:0005774	vacuolar membrane	6.76617	0.0105891	SNAP29, GGA1, TMBIM1, BECN1, ARF6, MICALL1, PLEKHM2, TMEM184A, NAPA, UBAP1, ATP6AP1, ATP13A2, HGS, ZNRF2, CLCN7, ERBB2, AP3B1, CHMP1A, VAC14, ABCB6, MAP3K7, ANXA6, VPS28, MVB12A, AP1B1, ATP6V0D1, RFFL, AP2A1, SLC48A1, PLA2G4F, RAC1, SNX8, SLC44A2, LLGL1, SH3GLB1, ATP6V0E2, EEF1A2, GNA11, PLIN3, GNB2, ATG9A, SPNS1, ARL8A, ABCA2, DNAJC5, AP1M1, IRAK2, CD320, AP2S1, MCOLN1, AP2M1, RAB11B, SCARB2, AT…
GO:0044437	vacuolar part	7.26368	0.0331807	SNAP29, GGA1, TMBIM1, GPC1, BECN1, ARF6, MICALL1, PLEKHM2, TMEM184A, NAPA, UBAP1, ATP6AP1, ATP13A2, HGS, ZNRF2, CLCN7, PLBD2, ERBB2, CHMP1A, AP3B1, VAC14, ABCB6, MAP3K7, ANXA6, VPS28, MVB12A, AP1B1, SMPD1, ATP6V0D1, RFFL, AP2A1, SLC48A1, PLA2G4F, RAC1, SNX8, SLC44A2, LLGL1, SH3GLB1, ATP6V0E2, EEF1A2, GNA11, PLIN3, GNB2, ATG9A, SPNS1, ARL8A, ABCA2, DNAJC5, AP1M1, IRAK2, CD320, AP2S1, MCOLN1, AP2M1…
Gene Ontology:- Molecular Function
No enriched terms

## Sheet: M4
Term ID	Term description	Genes in term (%)	P-value (BH-corrected)	Module genes in term
Gene Ontology:- Biological Process
GO:0016070	RNA metabolic process	35.5556	1.07657e-05	CLK2, CLK1, ZNF765, TRIM13, ZNF417, CARF, ELK4, ZNF248, MALT1, STAT2, TAF1L, SREK1, DHX35, TAF1, NUP160, NUP85, C5orf54, NUPL2, ZSCAN9, SMARCAD1, ZNF662, ZKSCAN8, PHF8, ZNF785, ZNF195, NRIP2, PCGF3, INO80D, TBL1XR1, TRMT44, MLLT10, ZNF552, METTL3, ZC3H11A, TDP2, GABPB2, SEPSECS, PAPD4, ZNF692, ATG16L2, TIA1, HMBOX1, ZNF721, POLR3F, NAA16, INTS8, EBF3, EXOSC8, TRIM33, CREBZF, THOC1, CTDSPL2, EIF2A…
GO:0051252	regulation of RNA metabolic process	28.4722	3.02715e-05	CLK2, CLK1, ZNF765, CARF, ZNF417, TRIM13, ZNF248, ELK4, MALT1, TAF1L, STAT2, SREK1, TAF1, NUP85, C5orf54, SMARCAD1, ZSCAN9, ZNF662, PHF8, ZKSCAN8, ZNF195, ZNF785, NRIP2, PCGF3, INO80D, TBL1XR1, MLLT10, ZNF552, TDP2, GABPB2, ZNF692, TIA1, HMBOX1, ZNF721, POLR3F, NAA16, EBF3, TRIM33, CREBZF, THOC1, CTDSPL2, EIF2AK2, TARBP1, ZNF100, NR2C1, ZNF175, NR2C2, ZMYM1, ZNF589, ZSCAN30, ZNF546, CHD9, MEG3, G…
GO:0019219	regulation of nucleobase-containing compound metabolic process	30.1389	4.85825e-05	CLK2, CLK1, ZNF765, TRIM13, CARF, ZNF417, ZNF248, ELK4, MALT1, STAT2, TAF1L, SREK1, TAF1, NUP85, C5orf54, SMARCAD1, ZSCAN9, ZNF662, PHF8, ZKSCAN8, ZNF785, ZNF195, NRIP2, PCGF3, INO80D, TBL1XR1, MLLT10, ZNF552, TDP2, GABPB2, ZNF692, TIA1, HMBOX1, ZNF721, POLR3F, NAA16, EBF3, TRIM33, CREBZF, THOC1, CTDSPL2, EIF2AK2, TARBP1, ZNF100, NR2C1, ZNF175, NR2C2, ZMYM1, ZNF589, ZSCAN30, ZNF546, CHD9, MEG3, G…
GO:0097659	nucleic acid-templated transcription	28.0556	9.29797e-05	ZNF765, CARF, ZNF417, TRIM13, ZNF248, ELK4, MALT1, TAF1L, STAT2, TAF1, NUP85, C5orf54, SMARCAD1, ZSCAN9, ZNF662, PHF8, ZKSCAN8, ZNF195, ZNF785, NRIP2, PCGF3, INO80D, TBL1XR1, MLLT10, ZNF552, ZC3H11A, TDP2, GABPB2, ZNF692, HMBOX1, ZNF721, POLR3F, NAA16, INTS8, EBF3, TRIM33, CREBZF, THOC1, CTDSPL2, EIF2AK2, TARBP1, ZNF100, ZNF175, NR2C1, NR2C2, ZMYM1, ZNF589, ZSCAN30, ZNF546, CHD9, MEG3, GTF2H2, ZN…
GO:0006351	transcription, DNA-templated	27.3611	9.58141e-05	ZNF765, CARF, ZNF417, TRIM13, ZNF248, ELK4, MALT1, TAF1L, STAT2, TAF1, NUP85, C5orf54, SMARCAD1, ZSCAN9, ZNF662, PHF8, ZKSCAN8, ZNF195, ZNF785, NRIP2, PCGF3, INO80D, TBL1XR1, MLLT10, ZNF552, ZC3H11A, GABPB2, ZNF692, HMBOX1, ZNF721, POLR3F, NAA16, INTS8, EBF3, TRIM33, THOC1, CREBZF, CTDSPL2, EIF2AK2, TARBP1, ZNF100, ZNF175, NR2C1, NR2C2, ZMYM1, ZSCAN30, ZNF546, CHD9, MEG3, GTF2H2, ZNF514, ZNF780B,…
GO:0006355	regulation of transcription, DNA-templated	26.8056	9.98379e-05	ZNF765, CARF, ZNF417, TRIM13, ZNF248, ELK4, MALT1, TAF1L, STAT2, TAF1, NUP85, C5orf54, SMARCAD1, ZSCAN9, ZNF662, PHF8, ZKSCAN8, ZNF195, ZNF785, NRIP2, PCGF3, INO80D, TBL1XR1, MLLT10, ZNF552, GABPB2, ZNF692, HMBOX1, ZNF721, POLR3F, NAA16, EBF3, TRIM33, THOC1, CREBZF, CTDSPL2, EIF2AK2, TARBP1, ZNF100, ZNF175, NR2C1, NR2C2, ZMYM1, ZNF589, ZSCAN30, ZNF546, CHD9, MEG3, GTF2H2, ZNF514, ZNF780B, DMTF1, …
GO:2001141	regulation of RNA biosynthetic process	26.9444	0.000110776	ZNF765, CARF, ZNF417, TRIM13, ZNF248, ELK4, MALT1, TAF1L, STAT2, TAF1, NUP85, C5orf54, SMARCAD1, ZSCAN9, ZNF662, PHF8, ZKSCAN8, ZNF195, ZNF785, NRIP2, PCGF3, INO80D, TBL1XR1, MLLT10, ZNF552, TDP2, GABPB2, ZNF692, HMBOX1, ZNF721, POLR3F, NAA16, EBF3, TRIM33, THOC1, CREBZF, CTDSPL2, EIF2AK2, TARBP1, ZNF100, ZNF175, NR2C1, NR2C2, ZMYM1, ZNF589, ZSCAN30, ZNF546, CHD9, MEG3, GTF2H2, ZNF514, ZNF780B, D…
GO:1903506	regulation of nucleic acid-templated transcription	26.9444	0.000118323	ZNF765, CARF, ZNF417, TRIM13, ZNF248, ELK4, MALT1, TAF1L, STAT2, TAF1, NUP85, C5orf54, SMARCAD1, ZSCAN9, ZNF662, PHF8, ZKSCAN8, ZNF195, ZNF785, NRIP2, PCGF3, INO80D, TBL1XR1, MLLT10, ZNF552, TDP2, GABPB2, ZNF692, HMBOX1, ZNF721, POLR3F, NAA16, EBF3, TRIM33, THOC1, CREBZF, CTDSPL2, EIF2AK2, TARBP1, ZNF100, ZNF175, NR2C1, NR2C2, ZMYM1, ZNF589, ZSCAN30, ZNF546, CHD9, MEG3, GTF2H2, ZNF514, ZNF780B, D…
GO:0032774	RNA biosynthetic process	28.75	0.000225953	ZNF765, CARF, ZNF417, TRIM13, ZNF248, ELK4, MALT1, TAF1L, STAT2, TAF1, NUP160, NUP85, C5orf54, SMARCAD1, ZSCAN9, NUPL2, ZNF662, PHF8, ZKSCAN8, ZNF785, ZNF195, NRIP2, PCGF3, INO80D, TBL1XR1, MLLT10, ZNF552, ZC3H11A, TDP2, GABPB2, SEPSECS, ZNF692, ATG16L2, HMBOX1, ZNF721, POLR3F, NAA16, INTS8, EBF3, TRIM33, CREBZF, THOC1, CTDSPL2, EIF2AK2, TARBP1, ZNF100, NR2C1, ZNF175, NR2C2, ZMYM1, ZNF589, ZSCAN3…
GO:0034654	nucleobase-containing compound biosynthetic process	31.1111	0.000495084	ZNF765, TRIM13, CARF, ZNF417, ZNF248, ELK4, MALT1, STAT2, TAF1L, TAF1, NUP160, NUP85, C5orf54, SMARCAD1, ZSCAN9, NUPL2, ZNF662, PHF8, ZKSCAN8, ZNF785, ZNF195, NRIP2, PCGF3, INO80D, TBL1XR1, MLLT10, ZNF552, ZC3H11A, TDP2, GABPB2, SEPSECS, ZNF692, ATG16L2, HMBOX1, ZNF721, POLR3F, NAA16, INTS8, EBF3, TRIM33, CREBZF, THOC1, CTDSPL2, EIF2AK2, TARBP1, ZNF100, NR2C1, ZNF175, NR2C2, ZMYM1, ZNF589, ZSCAN3…
GO:0010468	regulation of gene expression	30.8333	0.000607364	CLK2, CLK1, ZNF765, TRIM13, CARF, ZNF417, ZNF248, ELK4, MALT1, STAT2, TAF1L, SREK1, TAF1, NUP160, NUP85, C5orf54, SMARCAD1, ZSCAN9, NUPL2, ZNF662, PHF8, ZKSCAN8, ZNF785, ZNF195, NRIP2, PCGF3, INO80D, TBL1XR1, MLLT10, ZNF552, METTL3, GABPB2, SEPSECS, ZNF692, TIA1, HMBOX1, ZNF721, POLR3F, NAA16, EBF3, EXOSC8, TRIM33, CREBZF, THOC1, CTDSPL2, EIF2AK2, TARBP1, ZNF100, NR2C1, ZNF175, NR2C2, ZMYM1, ZNF5…
GO:0051171	regulation of nitrogen compound metabolic process	30.9722	0.000692827	CLK2, CLK1, ZNF765, TRIM13, CARF, ZNF417, ZNF248, ELK4, MALT1, STAT2, TAF1L, SREK1, TAF1, NUP85, C5orf54, SMARCAD1, ZSCAN9, ZNF662, PHF8, ZKSCAN8, ZNF785, ZNF195, NRIP2, PCGF3, INO80D, TBL1XR1, MLLT10, ZNF552, METTL3, TDP2, GABPB2, SEPSECS, ZNF692, TIA1, HMBOX1, ZNF721, POLR3F, NAA16, EBF3, TRIM33, CREBZF, THOC1, CTDSPL2, EIF2AK2, TARBP1, ZNF100, NR2C1, ZNF175, NR2C2, ZMYM1, ZNF589, ZSCAN30, ZNF5…
GO:0010467	gene expression	37.5	0.000870245	CLK2, CLK1, ZNF765, TRIM13, ZNF417, CARF, ELK4, ZNF248, MALT1, STAT2, TAF1L, SREK1, DHX35, TAF1, NUP160, NXF1, NUP85, C5orf54, NUPL2, ZSCAN9, SMARCAD1, ZNF662, ZKSCAN8, PHF8, ZNF785, ZNF195, NRIP2, PCGF3, INO80D, TBL1XR1, TRMT44, MLLT10, ZNF552, METTL3, ZC3H11A, GABPB2, SEPSECS, PAPD4, ZNF692, TIA1, HMBOX1, SLC25A17, ZNF721, POLR3F, NAA16, INTS8, EBF3, EXOSC8, TRIM33, CREBZF, THOC1, CTDSPL2, EIF2…
GO:0019438	aromatic compound biosynthetic process	31.1111	0.000951402	ZNF765, TRIM13, CARF, ZNF417, ZNF248, ELK4, MALT1, STAT2, TAF1L, TAF1, NUP160, NUP85, C5orf54, SMARCAD1, ZSCAN9, NUPL2, ZNF662, PHF8, ZKSCAN8, ZNF785, ZNF195, NRIP2, PCGF3, INO80D, TBL1XR1, MLLT10, ZNF552, ZC3H11A, TDP2, GABPB2, SEPSECS, ZNF692, ATG16L2, HMBOX1, ZNF721, POLR3F, NAA16, INTS8, EBF3, TRIM33, CREBZF, THOC1, CTDSPL2, EIF2AK2, TARBP1, ZNF100, NR2C1, ZNF175, NR2C2, ZMYM1, ZNF589, ZSCAN3…
GO:0018130	heterocycle biosynthetic process	31.1111	0.000951402	ZNF765, TRIM13, CARF, ZNF417, ZNF248, ELK4, MALT1, STAT2, TAF1L, TAF1, NUP160, NUP85, C5orf54, SMARCAD1, ZSCAN9, NUPL2, ZNF662, PHF8, ZKSCAN8, ZNF785, ZNF195, NRIP2, PCGF3, INO80D, TBL1XR1, MLLT10, ZNF552, ZC3H11A, TDP2, GABPB2, SEPSECS, ZNF692, ATG16L2, HMBOX1, ZNF721, POLR3F, NAA16, INTS8, EBF3, TRIM33, CREBZF, THOC1, CTDSPL2, EIF2AK2, TARBP1, ZNF100, NR2C1, ZNF175, NR2C2, ZMYM1, ZNF589, ZSCAN3…
GO:2000112	regulation of cellular macromolecule biosynthetic process	28.4722	0.00142532	ZNF765, CARF, ZNF417, TRIM13, ZNF248, ELK4, MALT1, TAF1L, STAT2, TAF1, NUP85, C5orf54, SMARCAD1, ZSCAN9, ZNF662, PHF8, ZKSCAN8, ZNF195, ZNF785, NRIP2, PCGF3, INO80D, TBL1XR1, MLLT10, ZNF552, METTL3, GABPB2, SEPSECS, ZNF692, TIA1, HMBOX1, ZNF721, POLR3F, FKTN, NAA16, EBF3, TRIM33, CREBZF, THOC1, CTDSPL2, EIF2AK2, TARBP1, ZNF100, NR2C1, ZNF175, NR2C2, ZMYM1, ZNF589, ZSCAN30, ZNF546, CHD9, MEG3, GTF…
GO:0010556	regulation of macromolecule biosynthetic process	29.0278	0.00149113	ZNF765, TRIM13, CARF, ZNF417, ZNF248, ELK4, MALT1, TAF1L, STAT2, TAF1, NUP85, C5orf54, SMARCAD1, ZSCAN9, ZNF662, PHF8, ZKSCAN8, ZNF785, ZNF195, NRIP2, PCGF3, INO80D, TBL1XR1, MLLT10, ZNF552, METTL3, TDP2, GABPB2, SEPSECS, ZNF692, TIA1, HMBOX1, ZNF721, POLR3F, FKTN, NAA16, EBF3, TRIM33, CREBZF, THOC1, CTDSPL2, EIF2AK2, TARBP1, ZNF100, NR2C1, ZNF175, NR2C2, ZMYM1, ZNF589, ZSCAN30, ZNF546, CHD9, MEG…
GO:0003351	epithelial cilium movement	0.833333	0.00244489	DNAH1, KIF27, NPHP3, STK36, RFX3, OFD1
Gene Ontology:- Cellular Component
GO:0016607	nuclear speck	3.61111	0.00113735	CLK2, THOC1, ZNF638, PPIG, NXF1, CDK13, CCNL2, SF3A3, PRPF3, ZC3H14, RBM25, DUSP11, SRRM2, SMC6, SNRNP70, U2AF1L4, METTL3, PNISR, GPATCH2, LUC7L3, FAM206A, THOC2, SRRM1, HIF3A, FAM76B, RBM4
GO:0016604	nuclear body	5	0.00157947	CLK2, THOC1, RFWD3, ZBTB1, ZNF638, PPIG, NXF1, CDK13, CCNL2, SF3A3, PRPF3, ZC3H14, NR2C1, ZNF451, RBM25, DUSP11, COIL, NPAT, SRRM2, MRE11A, SMC6, SNRNP70, U2AF1L4, METTL3, PNISR, TDP2, GPATCH2, LUC7L3, FAM206A, GEMIN8, TP53INP1, SRRM1, HIF3A, FAM76B, THOC2, RBM4
GO:0044451	nucleoplasm part	7.5	0.0245461	CLK2, PAXIP1, TAF1L, ZNF638, TAF1, NXF1, KAT2A, CCNL2, SUPT3H, ZC3H14, ZNF451, LAS1L, COIL, MRE11A, TBL1XR1, SUPT7L, U2AF1L4, METTL3, TDP2, GEMIN8, TP53INP1, MYO6, POLR3F, FAM76B, RBM4, INTS8, CPSF7, THOC1, RFWD3, ZBTB1, PPIG, CDK13, SF3A3, PRPF3, NR2C1, RBM25, SAP30, DUSP11, NPAT, SRRM2, SMC6, MED8, SNRNP70, PNISR, GPATCH2, LUC7L3, GTF2H2, FAM206A, SUDS3, THOC2, HIF3A, SRRM1, CCNT2, GTF2H4
Gene Ontology:- Cellular Component
GO:0003677	DNA binding	22.2222	1.15541e-10	ZNF765, ZNF160, CARF, ZNF417, HMGB2, ELK4, RAD54L2, ZNF248, ZNF449, STAT2, ZNF268, TAF1L, ZNF564, ZNF638, HILS1, TAF1, PMS1, ZNF251, ZFP14, C5orf54, ZNF791, SETMAR, TIGD1, ATF2, ZSCAN9, SMARCAD1, ZNF662, ZKSCAN8, BAZ2B, ZNF471, ZNF280D, ZNF785, ZNF107, ZNF195, BTAF1, ZNF337, TBL1XR1, MLLT10, ZNF552, FUBP3, TDP2, GABPB2, ZNF331, ZNF692, HMBOX1, ATM, ZBTB33, ZNF721, ZNF3, POU2F1, ZNF10, POGZ, ZNF14…
GO:0001071	nucleic acid binding transcription factor activity	11.6667	4.78754e-06	ZBTB25, ZKSCAN7, CARF, HMGB2, ELK4, ZNF449, STAT2, ZNF268, TAF1L, ZNF397, ZNF564, ZFP3, TAF1, RFX3, ZNF251, ZFP14, C5orf54, ZNF267, ZNF286A, ATF2, ZNF451, ZSCAN9, PLAGL1, ZKSCAN8, ZNF471, ZNF280D, BTAF1, ZSCAN25, ZNF37A, MLLT10, ZNF552, FUBP3, ZNF793, GABPB2, ZNF3, POU2F1, ZNF235, ZNF140, NFE2L3, ZNF7, EBF3, ZNF92, ZNF24, ZNF81, ZNF605, CREBZF, HOXB3, ZNF83, ZNF112, ZNF461, ZNF211, ZNF518A, ZNF22…
GO:0003700	transcription factor activity, sequence-specific DNA binding	11.6667	4.78754e-06	ZBTB25, ZKSCAN7, CARF, HMGB2, ELK4, ZNF449, STAT2, ZNF268, TAF1L, ZNF397, ZNF564, ZFP3, TAF1, RFX3, ZNF251, ZFP14, C5orf54, ZNF267, ZNF286A, ATF2, ZNF451, ZSCAN9, PLAGL1, ZKSCAN8, ZNF471, ZNF280D, BTAF1, ZSCAN25, ZNF37A, MLLT10, ZNF552, FUBP3, ZNF793, GABPB2, ZNF3, POU2F1, ZNF235, ZNF140, NFE2L3, ZNF7, EBF3, ZNF92, ZNF24, ZNF81, ZNF605, CREBZF, HOXB3, ZNF83, ZNF112, ZNF461, ZNF211, ZNF518A, ZNF22…
GO:0003676	nucleic acid binding	30.8333	1.57745e-05	ZNF765, CARF, ZNF417, ZNF248, RAD54L2, ELK4, STAT2, TAF1L, SREK1, DHX35, TAF1, PMS1, NXF1, C5orf54, SMARCAD1, ZSCAN9, NUPL2, ZNF662, ZKSCAN8, ZNF785, ZNF195, TBL1XR1, MLLT10, ZNF552, METTL3, ZC3H11A, TDP2, GABPB2, SEPSECS, ZNF692, HMBOX1, TIA1, ZNF721, POGZ, EBF3, EXOSC8, TRIM33, CREBZF, THOC1, GEN1, EIF2AK2, LSM8, TARBP1, ZNF100, NR2C1, ZNF175, C9orf114, DUSP11, NR2C2, ZMYM1, SRRM2, ZNF589, ZSCA…
GO:0043169	cation binding	27.6389	0.00160888	ZNF765, AGAP4, ZNF417, TRIM13, ZNF248, TRIM66, ZSCAN9, NUPL2, ZNF662, PHF8, ZKSCAN8, ZNF195, ZNF785, PCGF3, TRMT44, MLLT10, ZNF552, ZC3H11A, TDP2, PAPD4, ZNF692, ZNF721, POGZ, EBF3, TRIM33, CDH23, AGAP7, GEN1, ZNF100, ZNF175, NR2C1, CAPS2, NR2C2, ZMYM1, ZNF589, ZSCAN30, ZNF546, ACAP2, GTF2H2, ZNF514, PLCG1, ZNF780B, UNC13B, MASP2, ZNF155, MAP3K2, PAPD5, ZKSCAN7, ZBTB25, ANKZF1, ADCY6, PLCB4, ZNF3…
GO:0046872	metal ion binding	27.5	0.00195097	ZNF765, AGAP4, ZNF417, TRIM13, ZNF248, TRIM66, ZSCAN9, NUPL2, ZNF662, PHF8, ZKSCAN8, ZNF195, ZNF785, PCGF3, TRMT44, MLLT10, ZNF552, ZC3H11A, TDP2, PAPD4, ZNF692, ZNF721, POGZ, EBF3, TRIM33, CDH23, AGAP7, GEN1, ZNF100, ZNF175, NR2C1, CAPS2, NR2C2, ZMYM1, ZNF589, ZSCAN30, ZNF546, ACAP2, GTF2H2, ZNF514, PLCG1, ZNF780B, UNC13B, MASP2, ZNF155, MAP3K2, PAPD5, ZKSCAN7, ZBTB25, ANKZF1, ADCY6, PLCB4, ZNF3…
GO:0043167	ion binding	27.9167	0.00554153	ZNF765, AGAP4, ZNF417, TRIM13, ZNF248, TRIM66, ZSCAN9, NUPL2, ZNF662, PHF8, ZKSCAN8, ZNF195, ZNF785, PCGF3, TRMT44, MLLT10, ZNF552, ZC3H11A, TDP2, PAPD4, ZNF692, ZNF721, POGZ, EBF3, TRIM33, CDH23, AGAP7, GEN1, ZNF100, NR2C1, ZNF175, CAPS2, NR2C2, ZMYM1, ZNF589, ZSCAN30, ZNF546, ACAP2, GTF2H2, ZNF514, CSAD, PLCG1, ZNF780B, UNC13B, MASP2, ZNF155, MAP3K2, PAPD5, ZKSCAN7, ZBTB25, ANKZF1, ADCY6, PLCB4…
GO:0004556	alpha-amylase activity	0.694444	0.00602297	AMY1A, AMY1B, AMY1C, AMY2A, AMY2B
GO:0016160	amylase activity	0.694444	0.00602297	AMY1A, AMY1B, AMY1C, AMY2A, AMY2B
GO:1901363	heterocyclic compound binding	38.6111	0.00750316	CLK2, CLK1, ZNF765, ZNF417, CARF, ELK4, ZNF248, RAD54L2, STAT2, TAF1L, SREK1, NRBP2, DHX35, TAF1, PMS1, NXF1, C5orf54, ABCA10, TUBD1, TUBE1, NUPL2, ZSCAN9, SMARCAD1, ZNF662, ZKSCAN8, ZNF785, ZNF195, GK5, TBL1XR1, MLLT10, ZNF552, METTL3, ZC3H11A, TDP2, PXK, GABPB2, FMO3, SEPSECS, PAPD4, ZNF692, TIA1, HMBOX1, ZNF721, POGZ, EBF3, EXOSC8, TRIM33, CREBZF, RRAGB, THOC1, GEN1, EIF2AK2, TARBP1, LSM8, ZNF…
GO:0097159	organic cyclic compound binding	38.8889	0.00781345	CLK2, CLK1, ZNF765, ZNF417, CARF, ELK4, ZNF248, RAD54L2, STAT2, TAF1L, SREK1, NRBP2, DHX35, TAF1, PMS1, NXF1, C5orf54, ABCA10, TUBD1, TUBE1, NUPL2, ZSCAN9, SMARCAD1, ZNF662, ZKSCAN8, ZNF785, ZNF195, GK5, TBL1XR1, MLLT10, ZNF552, METTL3, ZC3H11A, TDP2, PXK, GABPB2, APOD, FMO3, SEPSECS, PAPD4, ZNF692, TIA1, HMBOX1, ZNF721, POGZ, EBF3, EXOSC8, TRIM33, CREBZF, RRAGB, THOC1, GEN1, OSBPL7, EIF2AK2, TAR…

## Sheet: M5
Term ID	Term description	Genes in term (%)	P-value (BH-corrected)	Module genes in term
Gene Ontology:- Biological Process
GO:0006936	muscle contraction	16.9492	0.00319597	MYH3, TMOD1, MYOM2, MYH4, MYH13, CTNNA3, MYH8, CALM1, MYH1, MYBPC2
GO:0003012	muscle system process	18.6441	0.00527897	MYH3, TMOD1, MYOM2, MYH4, MYH13, MEF2A, CTNNA3, MYH8, CALM1, MYH1, MYBPC2
GO:0030029	actin filament-based process	22.0339	0.00534483	CAPN3, TMOD1, MEF2A, MYH3, CAP2, MYH4, CTNNA3, CUL3, WNT4, MYH8, NCK2, RDX, MYBPC2
GO:0030049	muscle filament sliding	8.47458	0.0156007	MYH3, TMOD1, MYH4, MYH8, MYBPC2
GO:0033275	actin-myosin filament sliding	8.47458	0.0156007	MYH3, TMOD1, MYH4, MYH8, MYBPC2
GO:0070252	actin-mediated cell contraction	10.1695	0.0171341	MYH3, TMOD1, MYH4, CTNNA3, MYH8, MYBPC2
Gene Ontology:- Cellular Component
GO:0032982	myosin filament	11.8644	1.93915e-07	MYH3, MYOM2, MYH4, MYH13, MYH8, MYH1, MYBPC2
GO:0030016	myofibril	18.6441	5.28874e-06	MYH3, JPH1, TMOD1, CAPN3, MYOM2, MYH4, MYH13, CMYA5, MYH8, CALM1, MYH1
GO:0044449	contractile fiber part	18.6441	6.47028e-06	MYH3, JPH1, TMOD1, CAPN3, MYOM2, MYH4, MYH13, CMYA5, MYH8, CALM1, MYH1
GO:0043292	contractile fiber	18.6441	6.78333e-06	MYH3, JPH1, TMOD1, CAPN3, MYOM2, MYH4, MYH13, CMYA5, MYH8, CALM1, MYH1
GO:0030017	sarcomere	16.9492	1.38832e-05	MYH3, JPH1, TMOD1, CAPN3, MYOM2, MYH4, CMYA5, MYH8, CALM1, MYH1
GO:0016459	myosin complex	11.8644	1.86367e-05	MYH3, MYOM2, MYH4, MYH13, MYH8, MYH1, MYBPC2
GO:0005859	muscle myosin complex	8.47458	8.37931e-05	MYH3, MYH4, MYH13, MYH8, MYH1
GO:0016460	myosin II complex	8.47458	0.000294419	MYH3, MYH4, MYH13, MYH8, MYH1
GO:0015629	actin cytoskeleton	16.9492	0.00483753	CAP2, MYH3, TMOD1, MYOM2, MYH4, MYH13, MYH8, RDX, MYH1, MYBPC2
Gene Ontology:- Molecular Function
GO:0008307	structural constituent of muscle	8.47458	0.0104711	JPH1, CAPN3, MYOM2, MYH8, MYBPC2
GO:0003779	actin binding	16.9492	0.013307	CAP2, MYH3, TMOD1, MYH4, MYH13, CTNNA3, MYH8, RDX, MYH1, MYBPC2
GO:0008092	cytoskeletal protein binding	22.0339	0.0148357	CAP2, MYH3, TMOD1, CAPN3, MYH4, MYH13, CTNNA3, MYH8, CALM1, NCK2, RDX, MYH1, MYBPC2
GO:0000146	microfilament motor activity	6.77966	0.0153221	MYH3, MYH4, MYH13, MYH8
GO:0070011	peptidase activity, acting on L-amino acid peptides	15.2542	0.0319474	CAPN3, ADAM23, USP9X, MBTPS2, USP14, IDE, USP24, ZRANB1, ZFYVE9
GO:0008233	peptidase activity	15.2542	0.0367555	CAPN3, ADAM23, USP9X, MBTPS2, USP14, IDE, USP24, ZRANB1, ZFYVE9
GO:0003774	motor activity	8.47458	0.0392479	MYH3, MYH4, MYH13, MYH8, MYH1

## Sheet: M6
Term ID	Term description	Genes in term (%)	P-value (BH-corrected)	Module genes in term
Gene Ontology:- Biological Process
GO:0042590	antigen processing and presentation of exogenous peptide antigen via MHC class I	31.0345	1.36307e-10	PSMA7, PSMB3, PSMD4, PSMD14, PSMC3, PSMC1, PSMD7, PSMB7, PSMB6
GO:0090175	regulation of establishment of planar polarity	34.4828	1.40252e-10	PSMA7, PARD6A, PSMB3, PSMD4, PSMD14, PSMC3, PSMC1, PSMD7, PSMB7, PSMB6
GO:0033238	regulation of cellular amine metabolic process	31.0345	1.52002e-10	PSMA7, PSMB3, PSMD4, PSMD14, PSMC3, PSMC1, PSMD7, PSMB7, PSMB6
GO:0006521	regulation of cellular amino acid metabolic process	31.0345	1.63669e-10	PSMA7, PSMB3, PSMD4, PSMD14, PSMC3, PSMC1, PSMD7, PSMB7, PSMB6
GO:0002479	antigen processing and presentation of exogenous peptide antigen via MHC class I, TAP-dependent	31.0345	1.74021e-10	PSMA7, PSMB3, PSMD4, PSMD14, PSMC3, PSMC1, PSMD7, PSMB7, PSMB6
GO:1904667	negative regulation of ubiquitin protein ligase activity	31.0345	2.07818e-10	PSMA7, PSMB3, PSMD4, PSMD14, PSMC3, PSMC1, PSMD7, PSMB7, PSMB6
GO:0007164	establishment of tissue polarity	34.4828	2.25244e-10	PSMA7, PARD6A, PSMB3, PSMD4, PSMD14, PSMC3, PSMC1, PSMD7, PSMB7, PSMB6
GO:0001736	establishment of planar polarity	34.4828	2.25244e-10	PSMA7, PARD6A, PSMB3, PSMD4, PSMD14, PSMC3, PSMC1, PSMD7, PSMB7, PSMB6
GO:0051436	negative regulation of ubiquitin-protein ligase activity involved in mitotic cell cycle	31.0345	2.34173e-10	PSMA7, PSMB3, PSMD4, PSMD14, PSMC3, PSMC1, PSMD7, PSMB7, PSMB6
GO:0051439	regulation of ubiquitin-protein ligase activity involved in mitotic cell cycle	31.0345	2.34173e-10	PSMA7, PSMB3, PSMD4, PSMD14, PSMC3, PSMC1, PSMD7, PSMB7, PSMB6
GO:0051437	positive regulation of ubiquitin-protein ligase activity involved in regulation of mitotic cell cycle transition	31.0345	2.41928e-10	PSMA7, PSMB3, PSMD4, PSMD14, PSMC3, PSMC1, PSMD7, PSMB7, PSMB6
GO:0060071	Wnt signaling pathway, planar cell polarity pathway	34.4828	2.58639e-10	PSMA7, PARD6A, PSMB3, PSMD4, PSMD14, PSMC3, PSMC1, PSMD7, PSMB7, PSMB6
GO:0031145	anaphase-promoting complex-dependent catabolic process	31.0345	2.82159e-10	PSMA7, PSMB3, PSMD4, PSMD14, PSMC3, PSMC1, PSMD7, PSMB7, PSMB6
GO:1904668	positive regulation of ubiquitin protein ligase activity	31.0345	3.29255e-10	PSMA7, PSMB3, PSMD4, PSMD14, PSMC3, PSMC1, PSMD7, PSMB7, PSMB6
GO:0051444	negative regulation of ubiquitin-protein transferase activity	31.0345	3.29255e-10	PSMA7, PSMB3, PSMD4, PSMD14, PSMC3, PSMC1, PSMD7, PSMB7, PSMB6
GO:0001738	morphogenesis of a polarized epithelium	34.4828	3.51976e-10	PSMA7, PARD6A, PSMB3, PSMD4, PSMD14, PSMC3, PSMC1, PSMD7, PSMB7, PSMB6
GO:1904666	regulation of ubiquitin protein ligase activity	31.0345	3.56673e-10	PSMA7, PSMB3, PSMD4, PSMD14, PSMC3, PSMC1, PSMD7, PSMB7, PSMB6
GO:0044106	cellular amine metabolic process	31.0345	5.80564e-10	PSMA7, PSMB3, PSMD4, PSMD14, PSMC3, PSMC1, PSMD7, PSMB7, PSMB6
GO:2000060	positive regulation of protein ubiquitination involved in ubiquitin-dependent protein catabolic process	31.0345	6.72664e-10	PSMA7, PSMB3, PSMD4, PSMD14, PSMC3, PSMC1, PSMD7, PSMB7, PSMB6
GO:0002474	antigen processing and presentation of peptide antigen via MHC class I	31.0345	7.78023e-10	PSMA7, PSMB3, PSMD4, PSMD14, PSMC3, PSMC1, PSMD7, PSMB7, PSMB6
GO:0009308	amine metabolic process	31.0345	7.78023e-10	PSMA7, PSMB3, PSMD4, PSMD14, PSMC3, PSMC1, PSMD7, PSMB7, PSMB6
GO:0035567	non-canonical Wnt signaling pathway	34.4828	7.85341e-10	PSMA7, PARD6A, PSMB3, PSMD4, PSMD14, PSMC3, PSMC1, PSMD7, PSMB7, PSMB6
GO:0051443	positive regulation of ubiquitin-protein transferase activity	31.0345	1.13921e-09	PSMA7, PSMB3, PSMD4, PSMD14, PSMC3, PSMC1, PSMD7, PSMB7, PSMB6
GO:0038061	NIK/NF-kappaB signaling	31.0345	1.18993e-09	PSMA7, PSMB3, PSMD4, PSMD14, PSMC3, PSMC1, PSMD7, PSMB7, PSMB6
GO:2000058	regulation of protein ubiquitination involved in ubiquitin-dependent protein catabolic process	31.0345	1.18993e-09	PSMA7, PSMB3, PSMD4, PSMD14, PSMC3, PSMC1, PSMD7, PSMB7, PSMB6
GO:0002220	innate immune response activating cell surface receptor signaling pathway	31.0345	1.36532e-09	PSMA7, PSMB3, PSMD4, PSMD14, PSMC3, PSMC1, PSMD7, PSMB7, PSMB6
GO:0002223	stimulatory C-type lectin receptor signaling pathway	31.0345	1.36532e-09	PSMA7, PSMB3, PSMD4, PSMD14, PSMC3, PSMC1, PSMD7, PSMB7, PSMB6
GO:0033209	tumor necrosis factor-mediated signaling pathway	31.0345	1.70939e-09	PSMA7, PSMB3, PSMD4, PSMD14, PSMC3, PSMC1, PSMD7, PSMB7, PSMB6
GO:0051438	regulation of ubiquitin-protein transferase activity	31.0345	2.73781e-09	PSMA7, PSMB3, PSMD4, PSMD14, PSMC3, PSMC1, PSMD7, PSMB7, PSMB6
GO:0090263	positive regulation of canonical Wnt signaling pathway	31.0345	2.73781e-09	PSMA7, PSMB3, PSMD4, PSMD14, PSMC3, PSMC1, PSMD7, PSMB7, PSMB6
GO:0038095	Fc-epsilon receptor signaling pathway	31.0345	6.22318e-09	PSMA7, PSMB3, PSMD4, PSMD14, PSMC3, PSMC1, PSMD7, PSMB7, PSMB6
GO:2000027	regulation of organ morphogenesis	34.4828	9.79155e-09	PSMA7, PARD6A, PSMB3, PSMD4, PSMD14, PSMC3, PSMC1, PSMD7, PSMB7, PSMB6
GO:0031397	negative regulation of protein ubiquitination	31.0345	1.01794e-08	PSMA7, PSMB3, PSMD4, PSMD14, PSMC3, PSMC1, PSMD7, PSMB7, PSMB6
GO:0030177	positive regulation of Wnt signaling pathway	31.0345	1.20203e-08	PSMA7, PSMB3, PSMD4, PSMD14, PSMC3, PSMC1, PSMD7, PSMB7, PSMB6
GO:0010565	regulation of cellular ketone metabolic process	31.0345	1.50889e-08	PSMA7, PSMB3, PSMD4, PSMD14, PSMC3, PSMC1, PSMD7, PSMB7, PSMB6
GO:1903321	negative regulation of protein modification by small protein conjugation or removal	31.0345	1.55397e-08	PSMA7, PSMB3, PSMD4, PSMD14, PSMC3, PSMC1, PSMD7, PSMB7, PSMB6
GO:0050852	T cell receptor signaling pathway	31.0345	1.81718e-08	PSMA7, PSMB3, PSMD4, PSMD14, PSMC3, PSMC1, PSMD7, PSMB7, PSMB6
GO:0043488	regulation of mRNA stability	31.0345	1.99135e-08	PSMA7, PSMB3, PSMD4, PSMD14, PSMC3, PSMC1, PSMD7, PSMB7, PSMB6
GO:0002478	antigen processing and presentation of exogenous peptide antigen	31.0345	1.99135e-08	PSMA7, PSMB3, PSMD4, PSMD14, PSMC3, PSMC1, PSMD7, PSMB7, PSMB6
GO:0090090	negative regulation of canonical Wnt signaling pathway	31.0345	2.05128e-08	PSMA7, PSMB3, PSMD4, PSMD14, PSMC3, PSMC1, PSMD7, PSMB7, PSMB6
GO:0019884	antigen processing and presentation of exogenous antigen	31.0345	2.11405e-08	PSMA7, PSMB3, PSMD4, PSMD14, PSMC3, PSMC1, PSMD7, PSMB7, PSMB6
GO:0043487	regulation of RNA stability	31.0345	2.60548e-08	PSMA7, PSMB3, PSMD4, PSMD14, PSMC3, PSMC1, PSMD7, PSMB7, PSMB6
GO:0048002	antigen processing and presentation of peptide antigen	31.0345	3.57287e-08	PSMA7, PSMB3, PSMD4, PSMD14, PSMC3, PSMC1, PSMD7, PSMB7, PSMB6
GO:0050851	antigen receptor-mediated signaling pathway	31.0345	3.88338e-08	PSMA7, PSMB3, PSMD4, PSMD14, PSMC3, PSMC1, PSMD7, PSMB7, PSMB6
GO:0071356	cellular response to tumor necrosis factor	31.0345	5.22924e-08	PSMA7, PSMB3, PSMD4, PSMD14, PSMC3, PSMC1, PSMD7, PSMB7, PSMB6
GO:0030178	negative regulation of Wnt signaling pathway	31.0345	5.65691e-08	PSMA7, PSMB3, PSMD4, PSMD14, PSMC3, PSMC1, PSMD7, PSMB7, PSMB6
GO:0038093	Fc receptor signaling pathway	31.0345	6.43729e-08	PSMA7, PSMB3, PSMD4, PSMD14, PSMC3, PSMC1, PSMD7, PSMB7, PSMB6
GO:1903052	positive regulation of proteolysis involved in cellular protein catabolic process	31.0345	6.43729e-08	PSMA7, PSMB3, PSMD4, PSMD14, PSMC3, PSMC1, PSMD7, PSMB7, PSMB6
GO:0031398	positive regulation of protein ubiquitination	31.0345	6.43729e-08	PSMA7, PSMB3, PSMD4, PSMD14, PSMC3, PSMC1, PSMD7, PSMB7, PSMB6
GO:0019882	antigen processing and presentation	31.0345	8.90784e-08	PSMA7, PSMB3, PSMD4, PSMD14, PSMC3, PSMC1, PSMD7, PSMB7, PSMB6
GO:0034612	response to tumor necrosis factor	31.0345	9.57684e-08	PSMA7, PSMB3, PSMD4, PSMD14, PSMC3, PSMC1, PSMD7, PSMB7, PSMB6
GO:1903364	positive regulation of cellular protein catabolic process	31.0345	1.18538e-07	PSMA7, PSMB3, PSMD4, PSMD14, PSMC3, PSMC1, PSMD7, PSMB7, PSMB6
GO:1903322	positive regulation of protein modification by small protein conjugation or removal	31.0345	1.21303e-07	PSMA7, PSMB3, PSMD4, PSMD14, PSMC3, PSMC1, PSMD7, PSMB7, PSMB6
GO:0042180	cellular ketone metabolic process	31.0345	1.36094e-07	PSMA7, PSMB3, PSMD4, PSMD14, PSMC3, PSMC1, PSMD7, PSMB7, PSMB6
GO:0002758	innate immune response-activating signal transduction	31.0345	1.74082e-07	PSMA7, PSMB3, PSMD4, PSMD14, PSMC3, PSMC1, PSMD7, PSMB7, PSMB6
GO:0002218	activation of innate immune response	31.0345	1.94089e-07	PSMA7, PSMB3, PSMD4, PSMD14, PSMC3, PSMC1, PSMD7, PSMB7, PSMB6
GO:0060828	regulation of canonical Wnt signaling pathway	31.0345	2.07003e-07	PSMA7, PSMB3, PSMD4, PSMD14, PSMC3, PSMC1, PSMD7, PSMB7, PSMB6
GO:0042787	protein ubiquitination involved in ubiquitin-dependent protein catabolic process	31.0345	3.32715e-07	PSMA7, PSMB3, PSMD4, PSMD14, PSMC3, PSMC1, PSMD7, PSMB7, PSMB6
GO:0045089	positive regulation of innate immune response	31.0345	4.28859e-07	PSMA7, PSMB3, PSMD4, PSMD14, PSMC3, PSMC1, PSMD7, PSMB7, PSMB6
GO:1903050	regulation of proteolysis involved in cellular protein catabolic process	31.0345	4.36729e-07	PSMA7, PSMB3, PSMD4, PSMD14, PSMC3, PSMC1, PSMD7, PSMB7, PSMB6
GO:0002429	immune response-activating cell surface receptor signaling pathway	31.0345	4.44833e-07	PSMA7, PSMB3, PSMD4, PSMD14, PSMC3, PSMC1, PSMD7, PSMB7, PSMB6
GO:0060070	canonical Wnt signaling pathway	31.0345	5.0729e-07	PSMA7, PSMB3, PSMD4, PSMD14, PSMC3, PSMC1, PSMD7, PSMB7, PSMB6
GO:0031396	regulation of protein ubiquitination	31.0345	7.16235e-07	PSMA7, PSMB3, PSMD4, PSMD14, PSMC3, PSMC1, PSMD7, PSMB7, PSMB6
GO:0045732	positive regulation of protein catabolic process	31.0345	8.3776e-07	PSMA7, PSMB3, PSMD4, PSMD14, PSMC3, PSMC1, PSMD7, PSMB7, PSMB6
GO:1903362	regulation of cellular protein catabolic process	31.0345	8.3776e-07	PSMA7, PSMB3, PSMD4, PSMD14, PSMC3, PSMC1, PSMD7, PSMB7, PSMB6
GO:0002768	immune response-regulating cell surface receptor signaling pathway	31.0345	9.43637e-07	PSMA7, PSMB3, PSMD4, PSMD14, PSMC3, PSMC1, PSMD7, PSMB7, PSMB6
GO:0030111	regulation of Wnt signaling pathway	31.0345	1.02564e-06	PSMA7, PSMB3, PSMD4, PSMD14, PSMC3, PSMC1, PSMD7, PSMB7, PSMB6
GO:0031331	positive regulation of cellular catabolic process	31.0345	1.02564e-06	PSMA7, PSMB3, PSMD4, PSMD14, PSMC3, PSMC1, PSMD7, PSMB7, PSMB6
GO:0000209	protein polyubiquitination	31.0345	1.22895e-06	PSMA7, PSMB3, PSMD4, PSMD14, PSMC3, PSMC1, PSMD7, PSMB7, PSMB6
GO:1903320	regulation of protein modification by small protein conjugation or removal	31.0345	1.37462e-06	PSMA7, PSMB3, PSMD4, PSMD14, PSMC3, PSMC1, PSMD7, PSMB7, PSMB6
GO:0031349	positive regulation of defense response	31.0345	1.44042e-06	PSMA7, PSMB3, PSMD4, PSMD14, PSMC3, PSMC1, PSMD7, PSMB7, PSMB6
GO:0045088	regulation of innate immune response	31.0345	1.46205e-06	PSMA7, PSMB3, PSMD4, PSMD14, PSMC3, PSMC1, PSMD7, PSMB7, PSMB6
GO:0016055	Wnt signaling pathway	34.4828	1.4958e-06	PSMA7, PARD6A, PSMB3, PSMD4, PSMD14, PSMC3, PSMC1, PSMD7, PSMB7, PSMB6
GO:0198738	cell-cell signaling by wnt	34.4828	1.4958e-06	PSMA7, PARD6A, PSMB3, PSMD4, PSMD14, PSMC3, PSMC1, PSMD7, PSMB7, PSMB6
GO:1901990	regulation of mitotic cell cycle phase transition	31.0345	1.50692e-06	PSMA7, PSMB3, PSMD4, PSMD14, PSMC3, PSMC1, PSMD7, PSMB7, PSMB6
GO:0002009	morphogenesis of an epithelium	34.4828	2.12658e-06	PSMA7, PARD6A, PSMB3, PSMD4, PSMD14, PSMC3, PSMC1, PSMD7, PSMB7, PSMB6
GO:1901987	regulation of cell cycle phase transition	31.0345	2.2359e-06	PSMA7, PSMB3, PSMD4, PSMD14, PSMC3, PSMC1, PSMD7, PSMB7, PSMB6
GO:1905114	cell surface receptor signaling pathway involved in cell-cell signaling	34.4828	2.26245e-06	PSMA7, PARD6A, PSMB3, PSMD4, PSMD14, PSMC3, PSMC1, PSMD7, PSMB7, PSMB6
GO:0051348	negative regulation of transferase activity	31.0345	3.82696e-06	PSMA7, PSMB3, PSMD4, PSMD14, PSMC3, PSMC1, PSMD7, PSMB7, PSMB6
GO:0009896	positive regulation of catabolic process	31.0345	3.82696e-06	PSMA7, PSMB3, PSMD4, PSMD14, PSMC3, PSMC1, PSMD7, PSMB7, PSMB6
GO:0002757	immune response-activating signal transduction	31.0345	5.47077e-06	PSMA7, PSMB3, PSMD4, PSMD14, PSMC3, PSMC1, PSMD7, PSMB7, PSMB6
GO:0045862	positive regulation of proteolysis	31.0345	5.67597e-06	PSMA7, PSMB3, PSMD4, PSMD14, PSMC3, PSMC1, PSMD7, PSMB7, PSMB6
GO:0045087	innate immune response	34.4828	8.28066e-06	PSMA7, PSMB3, PSMD4, PSMD14, PSMC3, PSMC1, PSMD7, PRDX1, PSMB7, PSMB6
GO:0042176	regulation of protein catabolic process	31.0345	8.42777e-06	PSMA7, PSMB3, PSMD4, PSMD14, PSMC3, PSMC1, PSMD7, PSMB7, PSMB6
GO:0048729	tissue morphogenesis	34.4828	8.86406e-06	PSMA7, PARD6A, PSMB3, PSMD4, PSMD14, PSMC3, PSMC1, PSMD7, PSMB7, PSMB6
GO:0002764	immune response-regulating signaling pathway	31.0345	9.02119e-06	PSMA7, PSMB3, PSMD4, PSMD14, PSMC3, PSMC1, PSMD7, PSMB7, PSMB6
GO:0031329	regulation of cellular catabolic process	31.0345	9.33153e-06	PSMA7, PSMB3, PSMD4, PSMD14, PSMC3, PSMC1, PSMD7, PSMB7, PSMB6
GO:0002253	activation of immune response	31.0345	9.42608e-06	PSMA7, PSMB3, PSMD4, PSMD14, PSMC3, PSMC1, PSMD7, PSMB7, PSMB6
GO:0019221	cytokine-mediated signaling pathway	31.0345	9.52256e-06	PSMA7, PSMB3, PSMD4, PSMD14, PSMC3, PSMC1, PSMD7, PSMB7, PSMB6
GO:0031400	negative regulation of protein modification process	34.4828	1.29568e-05	PSMA7, PARD6A, PSMB3, PSMD4, PSMD14, PSMC3, PSMC1, PSMD7, PSMB7, PSMB6
GO:0043161	proteasome-mediated ubiquitin-dependent protein catabolic process	31.0345	1.36932e-05	PSMA7, PSMB3, PSMD4, PSMD14, PSMC3, PSMC1, PSMD7, PSMB7, PSMB6
GO:0010498	proteasomal protein catabolic process	31.0345	2.12595e-05	PSMA7, PSMB3, PSMD4, PSMD14, PSMC3, PSMC1, PSMD7, PSMB7, PSMB6
GO:0007346	regulation of mitotic cell cycle	31.0345	2.90812e-05	PSMA7, PSMB3, PSMD4, PSMD14, PSMC3, PSMC1, PSMD7, PSMB7, PSMB6
GO:0050778	positive regulation of immune response	31.0345	3.42703e-05	PSMA7, PSMB3, PSMD4, PSMD14, PSMC3, PSMC1, PSMD7, PSMB7, PSMB6
GO:0043086	negative regulation of catalytic activity	34.4828	4.23861e-05	PSMA7, PSMB3, PSMD4, PSMD14, PSMC3, ARL2, PSMC1, PSMD7, PSMB7, PSMB6
GO:0000165	MAPK cascade	34.4828	4.23861e-05	PSMA7, PSMB3, PSMD4, PSMD14, PSMC3, PSMC1, PSMD7, PRDX1, PSMB7, PSMB6
GO:0031347	regulation of defense response	31.0345	4.36287e-05	PSMA7, PSMB3, PSMD4, PSMD14, PSMC3, PSMC1, PSMD7, PSMB7, PSMB6
GO:0044772	mitotic cell cycle phase transition	31.0345	4.81593e-05	PSMA7, PSMB3, PSMD4, PSMD14, PSMC3, PSMC1, PSMD7, PSMB7, PSMB6
GO:0010608	posttranscriptional regulation of gene expression	31.0345	5.02655e-05	PSMA7, PSMB3, PSMD4, PSMD14, PSMC3, PSMC1, PSMD7, PSMB7, PSMB6
GO:0022603	regulation of anatomical structure morphogenesis	37.931	5.83536e-05	TTL, PSMA7, PARD6A, PSMB3, PSMD4, PSMD14, PSMC3, PSMC1, PSMD7, PSMB7, PSMB6
GO:0023014	signal transduction by protein phosphorylation	34.4828	5.86851e-05	PSMA7, PSMB3, PSMD4, PSMD14, PSMC3, PSMC1, PSMD7, PRDX1, PSMB7, PSMB6
GO:0009894	regulation of catabolic process	31.0345	5.91071e-05	PSMA7, PSMB3, PSMD4, PSMD14, PSMC3, PSMC1, PSMD7, PSMB7, PSMB6
GO:0044770	cell cycle phase transition	31.0345	6.83737e-05	PSMA7, PSMB3, PSMD4, PSMD14, PSMC3, PSMC1, PSMD7, PSMB7, PSMB6
GO:0010564	regulation of cell cycle process	31.0345	7.36535e-05	PSMA7, PSMB3, PSMD4, PSMD14, PSMC3, PSMC1, PSMD7, PSMB7, PSMB6
GO:0071345	cellular response to cytokine stimulus	31.0345	7.40843e-05	PSMA7, PSMB3, PSMD4, PSMD14, PSMC3, PSMC1, PSMD7, PSMB7, PSMB6
GO:0031399	regulation of protein modification process	44.8276	7.58491e-05	PSMA7, PARD6A, CDK2AP1, ZNHIT1, PSMB3, PSMD4, PSMD14, PSMC3, PSMC1, PSMD7, PRDX1, PSMB7, PSMB6
GO:0051347	positive regulation of transferase activity	31.0345	9.30547e-05	PSMA7, PSMB3, PSMD4, PSMD14, PSMC3, PSMC1, PSMD7, PSMB7, PSMB6
GO:0007267	cell-cell signaling	37.931	0.000104642	PSMA7, PARD6A, PSMB3, PSMD4, PSMD14, PSMC3, ARL2, PSMC1, PSMD7, PSMB7, PSMB6
GO:0009887	organ morphogenesis	34.4828	0.000134258	PSMA7, PARD6A, PSMB3, PSMD4, PSMD14, PSMC3, PSMC1, PSMD7, PSMB7, PSMB6
GO:0030162	regulation of proteolysis	31.0345	0.000158351	PSMA7, PSMB3, PSMD4, PSMD14, PSMC3, PSMC1, PSMD7, PSMB7, PSMB6
GO:0006511	ubiquitin-dependent protein catabolic process	31.0345	0.000163888	PSMA7, PSMB3, PSMD4, PSMD14, PSMC3, PSMC1, PSMD7, PSMB7, PSMB6
GO:0050776	regulation of immune response	31.0345	0.000169585	PSMA7, PSMB3, PSMD4, PSMD14, PSMC3, PSMC1, PSMD7, PSMB7, PSMB6
GO:0019941	modification-dependent protein catabolic process	31.0345	0.000178039	PSMA7, PSMB3, PSMD4, PSMD14, PSMC3, PSMC1, PSMD7, PSMB7, PSMB6
GO:0034097	response to cytokine	31.0345	0.00019233	PSMA7, PSMB3, PSMD4, PSMD14, PSMC3, PSMC1, PSMD7, PSMB7, PSMB6
GO:0060429	epithelium development	34.4828	0.000192519	PSMA7, PARD6A, PSMB3, PSMD4, PSMD14, PSMC3, PSMC1, PSMD7, PSMB7, PSMB6
GO:0043632	modification-dependent macromolecule catabolic process	31.0345	0.000194041	PSMA7, PSMB3, PSMD4, PSMD14, PSMC3, PSMC1, PSMD7, PSMB7, PSMB6
GO:0016310	phosphorylation	48.2759	0.000221757	CDK2AP1, PARD6A, PSMB3, PSMD4, PSMD14, PSMC3, PSMD7, PRDX1, PSMC1, PSMB7, PSMB6, PSMA7, GUK1, PIPSL
GO:0002684	positive regulation of immune system process	31.0345	0.000296862	PSMA7, PSMB3, PSMD4, PSMD14, PSMC3, PSMC1, PSMD7, PSMB7, PSMB6
GO:0032269	negative regulation of cellular protein metabolic process	34.4828	0.000322667	PSMA7, PARD6A, PSMB3, PSMD4, PSMD14, PSMC3, PSMC1, PSMD7, PSMB7, PSMB6
GO:0051603	proteolysis involved in cellular protein catabolic process	31.0345	0.000356297	PSMA7, PSMB3, PSMD4, PSMD14, PSMC3, PSMC1, PSMD7, PSMB7, PSMB6
GO:0044092	negative regulation of molecular function	34.4828	0.000356864	PSMA7, PSMB3, PSMD4, PSMD14, PSMC3, ARL2, PSMC1, PSMD7, PSMB7, PSMB6
GO:0031401	positive regulation of protein modification process	34.4828	0.000425225	PSMA7, CDK2AP1, PSMB3, PSMD4, PSMD14, PSMC3, PSMC1, PSMD7, PSMB7, PSMB6
GO:0006952	defense response	34.4828	0.000453651	PSMA7, PSMB3, PSMD4, PSMD14, PSMC3, PSMC1, PSMD7, PRDX1, PSMB7, PSMB6
GO:0044257	cellular protein catabolic process	31.0345	0.000465323	PSMA7, PSMB3, PSMD4, PSMD14, PSMC3, PSMC1, PSMD7, PSMB7, PSMB6
GO:0051248	negative regulation of protein metabolic process	34.4828	0.000468737	PSMA7, PARD6A, PSMB3, PSMD4, PSMD14, PSMC3, PSMC1, PSMD7, PSMB7, PSMB6
GO:0006955	immune response	34.4828	0.000495027	PSMA7, PSMB3, PSMD4, PSMD14, PSMC3, PSMC1, PSMD7, PRDX1, PSMB7, PSMB6
GO:0006468	protein phosphorylation	41.3793	0.000690905	PSMA7, PARD6A, CDK2AP1, PSMB3, PSMD4, PSMD14, PSMC3, PSMC1, PSMD7, PRDX1, PSMB7, PSMB6
GO:0007049	cell cycle	41.3793	0.000808085	PSMA7, PARD6A, CDK2AP1, PSMB3, PSMD4, PSMD14, PSMC3, ARL2, PSMC1, PSMD7, PSMB7, PSMB6
GO:0044248	cellular catabolic process	41.3793	0.000934975	PSMA7, LSM4, PSMB3, PSMD4, PSMD14, PSMC3, PSMC1, PSMD7, PRDX1, PSMB7, HSD17B10, PSMB6
GO:0044265	cellular macromolecule catabolic process	34.4828	0.000985263	PSMA7, LSM4, PSMB3, PSMD4, PSMD14, PSMC3, PSMC1, PSMD7, PSMB7, PSMB6
GO:0016567	protein ubiquitination	31.0345	0.00110336	PSMA7, PSMB3, PSMD4, PSMD14, PSMC3, PSMC1, PSMD7, PSMB7, PSMB6
GO:0030163	protein catabolic process	31.0345	0.00111739	PSMA7, PSMB3, PSMD4, PSMD14, PSMC3, PSMC1, PSMD7, PSMB7, PSMB6
GO:2000026	regulation of multicellular organismal development	37.931	0.00124251	TTL, PSMA7, PARD6A, PSMB3, PSMD4, PSMD14, PSMC3, PSMC1, PSMD7, PSMB7, PSMB6
GO:0080134	regulation of response to stress	34.4828	0.0012946	PSMA7, PSMB3, PSMD4, PSMD14, PSMC3, PSMC1, PSMD7, PRDX1, PSMB7, PSMB6
GO:0051338	regulation of transferase activity	31.0345	0.00144029	PSMA7, PSMB3, PSMD4, PSMD14, PSMC3, PSMC1, PSMD7, PSMB7, PSMB6
GO:1903047	mitotic cell cycle process	31.0345	0.00148705	PSMA7, PSMB3, PSMD4, PSMD14, PSMC3, PSMC1, PSMD7, PSMB7, PSMB6
GO:0032268	regulation of cellular protein metabolic process	44.8276	0.00192904	PSMA7, PARD6A, CDK2AP1, ZNHIT1, PSMB3, PSMD4, PSMD14, PSMC3, PSMC1, PSMD7, PRDX1, PSMB7, PSMB6
GO:0051726	regulation of cell cycle	31.0345	0.00215582	PSMA7, PSMB3, PSMD4, PSMD14, PSMC3, PSMC1, PSMD7, PSMB7, PSMB6
GO:0000278	mitotic cell cycle	31.0345	0.00254831	PSMA7, PSMB3, PSMD4, PSMD14, PSMC3, PSMC1, PSMD7, PSMB7, PSMB6
GO:0032270	positive regulation of cellular protein metabolic process	34.4828	0.00281239	PSMA7, CDK2AP1, PSMB3, PSMD4, PSMD14, PSMC3, PSMC1, PSMD7, PSMB7, PSMB6
GO:0032446	protein modification by small protein conjugation	31.0345	0.00281893	PSMA7, PSMB3, PSMD4, PSMD14, PSMC3, PSMC1, PSMD7, PSMB7, PSMB6
GO:0002682	regulation of immune system process	31.0345	0.0028469	PSMA7, PSMB3, PSMD4, PSMD14, PSMC3, PSMC1, PSMD7, PSMB7, PSMB6
GO:0009057	macromolecule catabolic process	34.4828	0.00312719	PSMA7, LSM4, PSMB3, PSMD4, PSMD14, PSMC3, PSMC1, PSMD7, PSMB7, PSMB6
GO:0009968	negative regulation of signal transduction	31.0345	0.00325251	PSMA7, PSMB3, PSMD4, PSMD14, PSMC3, PSMC1, PSMD7, PSMB7, PSMB6
GO:0051246	regulation of protein metabolic process	44.8276	0.00348075	PSMA7, PARD6A, CDK2AP1, ZNHIT1, PSMB3, PSMD4, PSMD14, PSMC3, PSMC1, PSMD7, PRDX1, PSMB7, PSMB6
GO:0051247	positive regulation of protein metabolic process	34.4828	0.00416188	PSMA7, CDK2AP1, PSMB3, PSMD4, PSMD14, PSMC3, PSMC1, PSMD7, PSMB7, PSMB6
GO:0010648	negative regulation of cell communication	31.0345	0.00485526	PSMA7, PSMB3, PSMD4, PSMD14, PSMC3, PSMC1, PSMD7, PSMB7, PSMB6
GO:0023057	negative regulation of signaling	31.0345	0.00489633	PSMA7, PSMB3, PSMD4, PSMD14, PSMC3, PSMC1, PSMD7, PSMB7, PSMB6
GO:0006796	phosphate-containing compound metabolic process	48.2759	0.00525371	CDK2AP1, PARD6A, PSMB3, PSMD4, PSMD14, PSMC3, PSMD7, PRDX1, PSMC1, PSMB7, PSMB6, PSMA7, GUK1, PIPSL
GO:0006793	phosphorus metabolic process	48.2759	0.00533958	CDK2AP1, PARD6A, PSMB3, PSMD4, PSMD14, PSMC3, PSMD7, PRDX1, PSMC1, PSMB7, PSMB6, PSMA7, GUK1, PIPSL
GO:0070647	protein modification by small protein conjugation or removal	31.0345	0.00623601	PSMA7, PSMB3, PSMD4, PSMD14, PSMC3, PSMC1, PSMD7, PSMB7, PSMB6
GO:0009967	positive regulation of signal transduction	31.0345	0.0095699	PSMA7, PSMB3, PSMD4, PSMD14, PSMC3, PSMC1, PSMD7, PSMB7, PSMB6
GO:0048585	negative regulation of response to stimulus	31.0345	0.0101108	PSMA7, PSMB3, PSMD4, PSMD14, PSMC3, PSMC1, PSMD7, PSMB7, PSMB6
GO:0010647	positive regulation of cell communication	31.0345	0.0144466	PSMA7, PSMB3, PSMD4, PSMD14, PSMC3, PSMC1, PSMD7, PSMB7, PSMB6
GO:0023056	positive regulation of signaling	31.0345	0.0148901	PSMA7, PSMB3, PSMD4, PSMD14, PSMC3, PSMC1, PSMD7, PSMB7, PSMB6
GO:0022402	cell cycle process	31.0345	0.0149012	PSMA7, PSMB3, PSMD4, PSMD14, PSMC3, PSMC1, PSMD7, PSMB7, PSMB6
GO:0035556	intracellular signal transduction	41.3793	0.0177099	PSMA7, PSMB3, PSMD4, PSMD14, PSMC3, ARF5, ARL2, PSMC1, PSMD7, PRDX1, PSMB7, PSMB6
GO:0043085	positive regulation of catalytic activity	31.0345	0.0226616	PSMA7, PSMB3, PSMD4, PSMD14, PSMC3, PSMC1, PSMD7, PSMB7, PSMB6
GO:0006508	proteolysis	31.0345	0.0235598	PSMA7, PSMB3, PSMD4, PSMD14, PSMC3, PSMC1, PSMD7, PSMB7, PSMB6
GO:0070887	cellular response to chemical stimulus	37.931	0.0378683	PSMA7, PARD6A, PSMB3, PSMD4, PSMD14, PSMC3, PSMC1, PSMD7, PRDX1, PSMB7, PSMB6
GO:0071310	cellular response to organic substance	34.4828	0.0411798	PSMA7, PARD6A, PSMB3, PSMD4, PSMD14, PSMC3, PSMC1, PSMD7, PSMB7, PSMB6
Gene Ontology:- Cellular Component
GO:0000502	proteasome complex	31.0345	5.21759e-10	PSMA7, PSMB3, PSMD4, PSMD14, PSMC3, PSMC1, PSMD7, PSMB7, PSMB6
GO:0005838	proteasome regulatory particle	17.2414	2.17948e-05	PSMD4, PSMD14, PSMC3, PSMC1, PSMD7
GO:0022624	proteasome accessory complex	17.2414	2.49878e-05	PSMD4, PSMD14, PSMC3, PSMC1, PSMD7
GO:0005839	proteasome core complex	13.7931	0.000599212	PSMA7, PSMB3, PSMB7, PSMB6
GO:0005829	cytosol	62.069	0.0023108	COPZ2, PARD6A, C12orf44, MIEN1, PSMB3, PSMD14, PSMD4, PSMC3, PSMD7, PSMB7, PRDX1, PSMC1, NUTF2, PSMB6, PSMA7, LSM4, ARL2, GUK1
GO:0008540	proteasome regulatory particle, base subcomplex	10.3448	0.0108401	PSMD4, PSMC3, PSMC1
GO:0031597	cytosolic proteasome complex	10.3448	0.0108401	PSMD14, PSMC3, PSMC1
Gene Ontology:- Molecular Function
GO:0004298	threonine-type endopeptidase activity	13.7931	0.00150544	PSMA7, PSMB3, PSMB7, PSMB6
GO:0070003	threonine-type peptidase activity	13.7931	0.00150544	PSMA7, PSMB3, PSMB7, PSMB6

## Sheet: M7
Term ID	Term description	Genes in term (%)	P-value (BH-corrected)	Module genes in term
Gene Ontology:- Biological Process
No enriched terms
Gene Ontology:- Cellular Component
GO:0031226	intrinsic component of plasma membrane	33.3333	0.00594465	REEP2, BST2, CA4, ICAM2, PCDH12, FUT1, GPIHBP1, ITGA6, CD36
GO:0016324	apical plasma membrane	18.5185	0.012568	BST2, CA4, SLC9A3R2, GPIHBP1, CD36
GO:0005576	extracellular region	51.8519	0.0150532	C1QTNF9, ISG15, REEP2, AGAP2, BST2, VPS37B, CA4, ISOC1, ICAM2, SLC9A3R2, PCDH12, GPIHBP1, ITGA6, CD36
GO:0045177	apical part of cell	18.5185	0.0157771	BST2, CA4, SLC9A3R2, GPIHBP1, CD36
GO:0098590	plasma membrane region	25.9259	0.017952	BST2, CA4, SLC9A3R2, GPIHBP1, ITGA6, PKD1L1, CD36
GO:0009897	external side of plasma membrane	14.8148	0.0233111	CA4, GPIHBP1, ITGA6, CD36
GO:0005887	integral component of plasma membrane	25.9259	0.0337397	REEP2, BST2, ICAM2, PCDH12, FUT1, ITGA6, CD36
Gene Ontology:- Molecular Function
No enriched terms

## Sheet: M8
Term ID	Term description	Genes in term (%)	P-value (BH-corrected)	Module genes in term
Gene Ontology:- Biological Process
No enriched terms
Gene Ontology:- Cellular Component
No enriched terms
Gene Ontology:- Molecular Function
No enriched terms

## Sheet: M9
Term ID	Term description	Genes in term (%)	P-value (BH-corrected)	Module genes in term
Gene Ontology:- Biological Process
GO:0045333	cellular respiration	9.93377	3.06423e-35	COX19, PMPCB, COX8A, UQCR10, ETFDH, PDHB, PDHA1, NDUFS7, OXA1L, ETFB, SDHB, SDHC, ETFA, MDH1, COX4I1, SURF1, COQ10A, UQCRFS1, UQCRC2, UQCRC1, NDUFB11, DLST, ME3, NDUFA10, FASTKD5, NDUFAB1, NDUFA9, NDUFA8, BNIP3, FH, TAZ, NDUFA11, COQ9, COX5A, FASTKD1, NDUFS8, NDUFB10, NDUFC1, NDUFV2, MTFR1L, NDUFS1, DLD, NDUFV1, TBRG4, DLAT, NDUFB7, NDUFS6, C11orf83, NDUFB8, NDUFS2, SLC25A12, NDUFS3, NDUFB5, CYCS…
GO:0007005	mitochondrion organization	18.0464	1.22489e-33	COX19, UQCR10, WDR45, MRPS17, MRPS7, JTB, NDUFS7, OXA1L, MTO1, TFB2M, GFM2, TOMM40L, PTCD2, CHCHD3, GGCT, GFM1, PTCD3, MRPL19, NDUFB11, MRP63, MRPS12, C2orf47, MRPL44, VDAC1, MRPS18A, RMND1, TIMMDC1, RHOU, PHB, MTFR1L, AGTPBP1, APOOL, SLC25A4, TIMM21, MRPL22, CYCS, APOO, NDUFAF3, PRDX3, MRPL16, MRPL35, HARS2, TIMM13, MTFP1, QRSL1, NDUFAF7, ACAD9, MRPS18B, MTX2, C19orf70, STOML2, NDUFAF6, BAD, TIM…
GO:0055114	oxidation-reduction process	19.5364	3.67714e-31	COX19, UQCR10, METTL20, PDHB, PDHA1, COQ6, ACADM, GLUD1, ACAT1, NDUFS7, OXA1L, DHRS4L1, TXN2, PRDX5, MTO1, MDH1, MMACHC, COX4I1, MARC2, ACOT8, ETHE1, AUH, NDUFB11, ALDH1A1, MECR, ME3, GSTK1, FH, MSRB2, BDH1, GLRX5, BCKDHB, COX5A, MTFR1L, TBRG4, CYCS, PRDX3, SDHAF2, HIGD2A, RTN4IP1, ALKBH3, PMPCB, COX8A, ETFDH, PCBD2, ACAD9, ETFB, DECR1, SDHB, SDHC, HCCS, PHYH, CBR4, ETFA, DHRSX, UBB, SURF1, ADHFE…
GO:0015980	energy derivation by oxidation of organic compounds	10.9272	5.72491e-30	COX19, COX8A, PMPCB, UQCR10, ETFDH, PDHB, PDHA1, ACADM, OXA1L, NDUFS7, ETFB, SDHB, SDHC, ETFA, MDH1, COX4I1, UBB, SURF1, PPP1R1A, PPP1CC, COQ10A, UQCRFS1, UQCRC2, UQCRC1, NDUFB11, DLST, ME3, NDUFA10, FASTKD5, NDUFAB1, NDUFA9, NDUFA8, BNIP3, FH, TAZ, NDUFA11, COQ9, COX5A, FASTKD1, NDUFS8, NDUFB10, NDUFC1, NDUFV2, MTFR1L, NDUFS1, DLD, NDUFV1, DLAT, TBRG4, NDUFB7, NDUFS6, C11orf83, NDUFB8, NDUFS2, S…
GO:0006091	generation of precursor metabolites and energy	11.9205	2.55482e-26	COX19, COX8A, PMPCB, UQCR10, ETFDH, PDHB, PDHA1, ACADM, OXA1L, NDUFS7, ETFB, SDHB, SDHC, ETFA, ATP5B, MDH1, COX4I1, UBB, SURF1, CHCHD10, PPIF, PPP1R1A, PPP1CC, COQ10A, UQCRFS1, UQCRC2, UQCRC1, NDUFB11, SLC25A3, DLST, ME3, NDUFA10, FASTKD5, NDUFAB1, NDUFA9, NDUFA8, BNIP3, FH, TAZ, NDUFA11, COQ9, COX5A, GBAS, FASTKD1, NDUFS8, NDUFB10, NDUFC1, NDUFV2, MTFR1L, NDUFS1, DLD, NDUFV1, NDUFB7, DLAT, TBRG4…
GO:0022904	respiratory electron transport chain	6.62252	2.12374e-24	NDUFB11, PMPCB, COX8A, UQCR10, ETFDH, NDUFA10, NDUFAB1, NDUFA9, NDUFA8, NDUFS7, ETFB, SDHB, SDHC, TAZ, NDUFA11, ETFA, COQ9, COX5A, NDUFS8, NDUFB10, NDUFC1, NDUFV2, NDUFS1, DLD, NDUFV1, NDUFB7, COX4I1, NDUFS6, C11orf83, NDUFB8, NDUFS2, SLC25A12, NDUFS3, NDUFB5, CYCS, CYC1, SDHAF2, UQCRFS1, UQCRC2, UQCRC1
GO:0022900	electron transport chain	6.62252	2.95025e-24	NDUFB11, PMPCB, COX8A, UQCR10, ETFDH, NDUFA10, NDUFAB1, NDUFA9, NDUFA8, NDUFS7, ETFB, SDHB, SDHC, TAZ, NDUFA11, ETFA, COQ9, COX5A, NDUFS8, NDUFB10, NDUFC1, NDUFV2, NDUFS1, DLD, NDUFV1, NDUFB7, COX4I1, NDUFS6, C11orf83, NDUFB8, NDUFS2, SLC25A12, NDUFS3, NDUFB5, CYCS, CYC1, SDHAF2, UQCRFS1, UQCRC2, UQCRC1
GO:0006119	oxidative phosphorylation	6.45695	1.47732e-23	NDUFB11, PMPCB, COX8A, UQCR10, NDUFA10, NDUFAB1, NDUFA9, NDUFA8, NDUFS7, SDHC, TAZ, NDUFA11, COQ9, COX5A, GBAS, NDUFS8, NDUFB10, NDUFC1, NDUFV2, NDUFS1, DLD, NDUFV1, NDUFB7, COX4I1, NDUFS6, C11orf83, NDUFB8, NDUFS2, SURF1, NDUFS3, NDUFB5, CHCHD10, PPIF, CYCS, CYC1, SDHAF2, UQCRFS1, UQCRC2, UQCRC1
GO:0033108	mitochondrial respiratory chain complex assembly	6.12583	3.70557e-23	COX19, NDUFB11, UQCR10, NDUFA10, NDUFAB1, NDUFA9, NDUFA8, NDUFAF7, ACAD9, COX14, OXA1L, NDUFS7, NDUFAF6, TAZ, C17orf89, NDUFA11, TIMMDC1, NDUFS8, NDUFB10, NDUFC1, NDUFV2, NDUFS1, FOXRED1, NDUFV1, NDUFB7, NDUFS6, C11orf83, NDUFB8, NDUFS2, SMIM20, SURF1, NDUFS3, UQCC1, NDUFB5, TIMM21, NDUFAF3, AIFM1
GO:0042775	mitochondrial ATP synthesis coupled electron transport	5.7947	2.34839e-22	NDUFB11, PMPCB, COX8A, UQCR10, NDUFA10, NDUFAB1, NDUFA9, NDUFA8, NDUFS7, SDHC, TAZ, NDUFA11, COQ9, COX5A, NDUFS8, NDUFB10, NDUFC1, NDUFV2, NDUFS1, DLD, NDUFV1, NDUFB7, COX4I1, NDUFS6, C11orf83, NDUFB8, NDUFS2, NDUFS3, NDUFB5, CYCS, CYC1, SDHAF2, UQCRFS1, UQCRC2, UQCRC1
GO:0042773	ATP synthesis coupled electron transport	5.7947	3.61406e-22	NDUFB11, PMPCB, COX8A, UQCR10, NDUFA10, NDUFAB1, NDUFA9, NDUFA8, NDUFS7, SDHC, TAZ, NDUFA11, COQ9, COX5A, NDUFS8, NDUFB10, NDUFC1, NDUFV2, NDUFS1, DLD, NDUFV1, NDUFB7, COX4I1, NDUFS6, C11orf83, NDUFB8, NDUFS2, NDUFS3, NDUFB5, CYCS, CYC1, SDHAF2, UQCRFS1, UQCRC2, UQCRC1
GO:0010257	NADH dehydrogenase complex assembly	4.96689	3.7895e-21	NDUFB11, NDUFA10, NDUFAB1, NDUFA9, NDUFA8, NDUFAF7, ACAD9, OXA1L, NDUFS7, NDUFAF6, TAZ, C17orf89, NDUFA11, TIMMDC1, NDUFS8, NDUFB10, NDUFC1, NDUFV2, NDUFS1, FOXRED1, NDUFB7, NDUFV1, NDUFS6, NDUFB8, NDUFS2, NDUFS3, NDUFB5, TIMM21, NDUFAF3, AIFM1
GO:0032981	mitochondrial respiratory chain complex I assembly	4.96689	3.7895e-21	NDUFB11, NDUFA10, NDUFAB1, NDUFA9, NDUFA8, NDUFAF7, ACAD9, OXA1L, NDUFS7, NDUFAF6, TAZ, C17orf89, NDUFA11, TIMMDC1, NDUFS8, NDUFB10, NDUFC1, NDUFV2, NDUFS1, FOXRED1, NDUFB7, NDUFV1, NDUFS6, NDUFB8, NDUFS2, NDUFS3, NDUFB5, TIMM21, NDUFAF3, AIFM1
GO:0097031	mitochondrial respiratory chain complex I biogenesis	4.96689	3.7895e-21	NDUFB11, NDUFA10, NDUFAB1, NDUFA9, NDUFA8, NDUFAF7, ACAD9, OXA1L, NDUFS7, NDUFAF6, TAZ, C17orf89, NDUFA11, TIMMDC1, NDUFS8, NDUFB10, NDUFC1, NDUFV2, NDUFS1, FOXRED1, NDUFB7, NDUFV1, NDUFS6, NDUFB8, NDUFS2, NDUFS3, NDUFB5, TIMM21, NDUFAF3, AIFM1
GO:0046034	ATP metabolic process	7.94702	3.56736e-17	NDUFB11, PMPCB, COX8A, UQCR10, NDUFA10, NDUFAB1, NDUFA9, NDUFA8, NDUFAF7, NDUFS7, SDHC, STOML2, ATP5O, TAZ, BAD, ATP5G3, NDUFA11, ATP5G1, COQ9, ATP5F1, COX5A, ATP5B, GBAS, NDUFS8, NDUFB10, NDUFC1, NDUFV2, NDUFS1, DLD, NDUFV1, NDUFB7, COX4I1, NDUFS6, C11orf83, NDUFB8, NDUFS2, SURF1, NDUFS3, ATP5A1, CHCHD10, NDUFB5, PPIF, CYC1, CYCS, SDHAF2, UQCRFS1, UQCRC2, UQCRC1
GO:0009141	nucleoside triphosphate metabolic process	8.60927	9.82326e-17	PMPCB, COX8A, UQCR10, NDUFAF7, NME6, NDUFS7, SDHC, STOML2, ATP5O, BAD, ATP5B, COX4I1, SURF1, CHCHD10, PPIF, UCKL1, UQCRFS1, UQCRC2, UQCRC1, NDUFB11, NDUFA10, NDUFAB1, NDUFA9, NDUFA8, TAZ, ATP5G3, NDUFA11, ATP5G1, COQ9, ATP5F1, COX5A, GBAS, NDUFS8, NDUFB10, NDUFC1, NDUFV2, NDUFS1, DLD, NDUFB7, NDUFV1, C11orf83, NDUFB8, NDUFS6, NDUFS2, DCTPP1, ATP5A1, NDUFS3, NDUFB5, CYCS, CYC1, SUCLG1, SDHAF2
GO:0009199	ribonucleoside triphosphate metabolic process	8.27815	1.24799e-16	PMPCB, COX8A, UQCR10, NDUFAF7, NME6, NDUFS7, SDHC, STOML2, ATP5O, BAD, ATP5B, COX4I1, SURF1, CHCHD10, PPIF, UCKL1, UQCRFS1, UQCRC2, UQCRC1, NDUFB11, NDUFA10, NDUFAB1, NDUFA9, NDUFA8, TAZ, ATP5G3, NDUFA11, ATP5G1, COQ9, ATP5F1, COX5A, GBAS, NDUFB10, NDUFS8, NDUFC1, NDUFV2, NDUFS1, DLD, NDUFB7, NDUFV1, C11orf83, NDUFB8, NDUFS6, NDUFS2, ATP5A1, NDUFS3, NDUFB5, CYCS, CYC1, SDHAF2
GO:0009205	purine ribonucleoside triphosphate metabolic process	8.11258	2.15933e-16	NDUFB11, PMPCB, COX8A, UQCR10, NDUFA10, NDUFAB1, NDUFA9, NDUFA8, NDUFAF7, NME6, NDUFS7, SDHC, STOML2, ATP5O, TAZ, BAD, ATP5G3, NDUFA11, ATP5G1, COQ9, ATP5F1, COX5A, ATP5B, GBAS, NDUFS8, NDUFB10, NDUFC1, NDUFV2, NDUFS1, DLD, NDUFV1, NDUFB7, COX4I1, NDUFS6, C11orf83, NDUFB8, NDUFS2, SURF1, NDUFS3, ATP5A1, CHCHD10, NDUFB5, PPIF, CYC1, CYCS, SDHAF2, UQCRFS1, UQCRC2, UQCRC1
GO:0006753	nucleoside phosphate metabolic process	11.9205	6.14467e-16	PMPCB, COX8A, UQCR10, HDHD1, PDHB, PDHA1, FLAD1, NDUFAF7, NME6, PDHX, ACAT1, NDUFS7, STOML2, SDHC, ATP5O, PRDX5, BAD, ATP5B, DNM1L, MPC1, MDH1, COX4I1, SURF1, CHCHD10, PPIF, UCKL1, HDDC3, MPC2, UQCRFS1, NT5C3B, UQCRC2, UQCRC1, NDUFB11, NDUFA10, NDUFAB1, NDUFA9, NDUFA8, FHIT, SHMT1, TAZ, NDUFA11, ATP5G3, ATP5G1, COQ9, ATP5F1, COX5A, GBAS, NDUFS8, NUDT9, NDUFB10, ME2, NDUFC1, NDUFV2, NDUFS1, DLD, N…
GO:0009144	purine nucleoside triphosphate metabolic process	8.11258	7.13659e-16	NDUFB11, PMPCB, COX8A, UQCR10, NDUFA10, NDUFAB1, NDUFA9, NDUFA8, NDUFAF7, NME6, NDUFS7, SDHC, STOML2, ATP5O, TAZ, BAD, ATP5G3, NDUFA11, ATP5G1, COQ9, ATP5F1, COX5A, ATP5B, GBAS, NDUFS8, NDUFB10, NDUFC1, NDUFV2, NDUFS1, DLD, NDUFV1, NDUFB7, COX4I1, NDUFS6, C11orf83, NDUFB8, NDUFS2, SURF1, NDUFS3, ATP5A1, CHCHD10, NDUFB5, PPIF, CYC1, CYCS, SDHAF2, UQCRFS1, UQCRC2, UQCRC1
GO:0009167	purine ribonucleoside monophosphate metabolic process	8.11258	1.99582e-15	NDUFB11, PMPCB, COX8A, UQCR10, NDUFA10, NDUFAB1, NDUFA9, NDUFA8, NDUFAF7, NDUFS7, SDHC, STOML2, ATP5O, TAZ, BAD, ATP5G3, NDUFA11, ATP5G1, COQ9, ATP5F1, COX5A, ATP5B, GBAS, NDUFS8, NUDT9, NDUFB10, NDUFC1, NDUFV2, NDUFS1, DLD, NDUFV1, NDUFB7, COX4I1, NDUFS6, C11orf83, NDUFB8, NDUFS2, SURF1, NDUFS3, ATP5A1, CHCHD10, NDUFB5, PPIF, CYC1, CYCS, SDHAF2, UQCRFS1, UQCRC2, UQCRC1
GO:0009161	ribonucleoside monophosphate metabolic process	8.27815	2.03284e-15	PMPCB, COX8A, UQCR10, NDUFAF7, NDUFS7, SDHC, STOML2, ATP5O, BAD, ATP5B, COX4I1, SURF1, CHCHD10, PPIF, UCKL1, UQCRFS1, UQCRC2, UQCRC1, NDUFB11, NDUFA10, NDUFAB1, NDUFA9, NDUFA8, TAZ, ATP5G3, NDUFA11, ATP5G1, COQ9, ATP5F1, COX5A, GBAS, NDUFB10, NUDT9, NDUFS8, NDUFC1, NDUFV2, NDUFS1, DLD, NDUFB7, NDUFV1, C11orf83, NDUFB8, NDUFS6, NDUFS2, ATP5A1, NDUFS3, NDUFB5, CYCS, CYC1, SDHAF2
GO:0009126	purine nucleoside monophosphate metabolic process	8.11258	2.05681e-15	NDUFB11, PMPCB, COX8A, UQCR10, NDUFA10, NDUFAB1, NDUFA9, NDUFA8, NDUFAF7, NDUFS7, SDHC, STOML2, ATP5O, TAZ, BAD, ATP5G3, NDUFA11, ATP5G1, COQ9, ATP5F1, COX5A, ATP5B, GBAS, NDUFS8, NUDT9, NDUFB10, NDUFC1, NDUFV2, NDUFS1, DLD, NDUFV1, NDUFB7, COX4I1, NDUFS6, C11orf83, NDUFB8, NDUFS2, SURF1, NDUFS3, ATP5A1, CHCHD10, NDUFB5, PPIF, CYC1, CYCS, SDHAF2, UQCRFS1, UQCRC2, UQCRC1
GO:0046128	purine ribonucleoside metabolic process	8.9404	2.06056e-15	PMPCB, COX8A, UQCR10, NDUFAF7, NME6, ACAT1, NDUFS7, SDHC, STOML2, ATP5O, BAD, ATP5B, COX4I1, SURF1, CHCHD10, PPIF, HDDC3, UQCRFS1, UQCRC2, UQCRC1, NDUFB11, NDUFA10, NDUFAB1, NDUFA9, NDUFA8, TAZ, ATP5G3, NDUFA11, ATP5G1, COQ9, ATP5F1, COX5A, GBAS, NDUFS8, NUDT9, NDUFB10, NDUFC1, NDUFV2, NDUFS1, DLD, NDUFB7, NDUFV1, C11orf83, NDUFB8, NDUFS6, ADAL, NDUFS2, ATP5A1, NDUFS3, NDUFB5, CYCS, CYC1, SDHAF2,…
GO:0009123	nucleoside monophosphate metabolic process	8.44371	2.47659e-15	PMPCB, COX8A, UQCR10, NDUFAF7, NDUFS7, SDHC, STOML2, ATP5O, BAD, ATP5B, COX4I1, SURF1, CHCHD10, PPIF, UCKL1, UQCRFS1, UQCRC2, UQCRC1, NDUFB11, NDUFA10, NDUFAB1, NDUFA9, NDUFA8, SHMT1, TAZ, ATP5G3, NDUFA11, ATP5G1, COQ9, ATP5F1, COX5A, GBAS, NDUFS8, NDUFB10, NUDT9, NDUFC1, NDUFV2, NDUFS1, DLD, NDUFB7, NDUFV1, C11orf83, NDUFB8, NDUFS6, NDUFS2, ATP5A1, NDUFS3, NDUFB5, CYCS, CYC1, SDHAF2
GO:0042278	purine nucleoside metabolic process	8.9404	2.56804e-15	PMPCB, COX8A, UQCR10, NDUFAF7, NME6, ACAT1, NDUFS7, SDHC, STOML2, ATP5O, BAD, ATP5B, COX4I1, SURF1, CHCHD10, PPIF, HDDC3, UQCRFS1, UQCRC2, UQCRC1, NDUFB11, NDUFA10, NDUFAB1, NDUFA9, NDUFA8, TAZ, ATP5G3, NDUFA11, ATP5G1, COQ9, ATP5F1, COX5A, GBAS, NDUFS8, NUDT9, NDUFB10, NDUFC1, NDUFV2, NDUFS1, DLD, NDUFB7, NDUFV1, C11orf83, NDUFB8, NDUFS6, ADAL, NDUFS2, ATP5A1, NDUFS3, NDUFB5, CYCS, CYC1, SDHAF2,…
GO:0009117	nucleotide metabolic process	11.5894	3.91954e-15	PMPCB, COX8A, UQCR10, HDHD1, PDHB, PDHA1, FLAD1, NDUFAF7, NME6, PDHX, ACAT1, NDUFS7, STOML2, SDHC, ATP5O, PRDX5, BAD, ATP5B, DNM1L, MPC1, MDH1, COX4I1, SURF1, CHCHD10, PPIF, UCKL1, HDDC3, MPC2, UQCRFS1, NT5C3B, UQCRC2, UQCRC1, NDUFB11, NDUFA10, NDUFAB1, NDUFA9, NDUFA8, FHIT, SHMT1, TAZ, NDUFA11, ATP5G3, ATP5G1, COQ9, ATP5F1, COX5A, GBAS, NDUFS8, NUDT9, NDUFB10, ME2, NDUFC1, NDUFV2, NDUFS1, DLD, N…
GO:0009119	ribonucleoside metabolic process	9.10596	5.37402e-15	PMPCB, COX8A, UQCR10, NDUFAF7, NME6, ACAT1, NDUFS7, SDHC, STOML2, ATP5O, BAD, ATP5B, COX4I1, SURF1, CHCHD10, PPIF, UCKL1, HDDC3, UQCRFS1, UQCRC2, UQCRC1, NDUFB11, NDUFA10, NDUFAB1, NDUFA9, NDUFA8, TAZ, ATP5G3, NDUFA11, ATP5G1, COQ9, ATP5F1, COX5A, GBAS, NDUFS8, NUDT9, NDUFB10, NDUFC1, NDUFV2, NDUFS1, DLD, NDUFB7, NDUFV1, C11orf83, NDUFB8, NDUFS6, ADAL, NDUFS2, ATP5A1, NDUFS3, NDUFB5, CYCS, CYC1, …
GO:0055086	nucleobase-containing small molecule metabolic process	12.0861	5.81488e-15	PMPCB, COX8A, UQCR10, HDHD1, PDHB, PDHA1, FLAD1, NUDT13, NDUFAF7, NME6, PDHX, ACAT1, NDUFS7, STOML2, SDHC, ATP5O, PRDX5, BAD, ATP5B, DNM1L, MPC1, MDH1, COX4I1, SURF1, CHCHD10, PPIF, UCKL1, HDDC3, MPC2, UQCRFS1, NT5C3B, UQCRC2, UQCRC1, NDUFB11, NDUFA10, NDUFAB1, NDUFA9, NDUFA8, FHIT, SHMT1, TAZ, NDUFA11, ATP5G3, ATP5G1, COQ9, ATP5F1, COX5A, GBAS, NDUFS8, NUDT9, NDUFB10, ME2, NDUFC1, NDUFV2, NDUFS1…
GO:0009116	nucleoside metabolic process	9.43709	6.57451e-15	PMPCB, COX8A, UQCR10, HDHD1, NDUFAF7, NME6, ACAT1, NDUFS7, SDHC, STOML2, ATP5O, BAD, ATP5B, DNM1L, COX4I1, SURF1, CHCHD10, PPIF, UCKL1, HDDC3, UQCRFS1, UQCRC2, UQCRC1, NDUFB11, NDUFA10, NDUFAB1, NDUFA9, NDUFA8, TAZ, ATP5G3, NDUFA11, ATP5G1, COQ9, ATP5F1, COX5A, GBAS, NDUFS8, NUDT9, NDUFB10, NDUFC1, NDUFV2, NDUFS1, DLD, NDUFB7, NDUFV1, NDUFS6, C11orf83, NDUFB8, ADAL, NDUFS2, ATP5A1, NDUFS3, NDUFB5…
GO:1901657	glycosyl compound metabolic process	9.60265	1.58762e-14	PMPCB, COX8A, UQCR10, HDHD1, NDUFAF7, NME6, ACAT1, NDUFS7, SDHC, STOML2, ATP5O, BAD, CBR4, ATP5B, DNM1L, COX4I1, SURF1, CHCHD10, PPIF, UCKL1, HDDC3, UQCRFS1, UQCRC2, UQCRC1, NDUFB11, NDUFA10, NDUFAB1, NDUFA9, NDUFA8, TAZ, ATP5G3, NDUFA11, ATP5G1, COQ9, ATP5F1, COX5A, GBAS, NDUFS8, NUDT9, NDUFB10, NDUFC1, NDUFV2, NDUFS1, DLD, NDUFB7, NDUFV1, NDUFS6, C11orf83, NDUFB8, ADAL, NDUFS2, ATP5A1, NDUFS3, …
GO:0006120	mitochondrial electron transport, NADH to ubiquinone	3.47682	2.45581e-13	NDUFB11, NDUFS8, NDUFB10, NDUFC1, NDUFA10, NDUFV2, NDUFAB1, NDUFS1, DLD, NDUFV1, NDUFA9, NDUFB7, NDUFS6, NDUFB8, NDUFA8, NDUFS2, NDUFS3, NDUFB5, NDUFS7, NDUFA11, COQ9
GO:0009060	aerobic respiration	3.80795	2.52465e-13	COX19, PMPCB, UQCR10, DLST, ME3, PDHB, MTFR1L, PDHA1, DLD, MDH1, NDUFV1, DLAT, SURF1, OXA1L, FH, SUCLG1, SUCLA2, SDHB, SUCLG2, SDHC, COX11, UQCRC2, UQCRC1
GO:0032543	mitochondrial translation	5.13245	3.69771e-12	DARS2, MRPL19, MRP63, MRPS12, MRPL44, MRPS22, MRPS17, QRSL1, MTERFD2, MRPS7, PET112, MRPS18A, MRPS5, MRPS18B, MRPS9, RMND1, MRPS15, GFM2, ICT1, UQCC1, MRPS35, MRPL41, MRPL22, TSFM, MTIF2, MRPL16, MRPL35, GFM1, HARS2, MRPS24, PTCD3
GO:0019637	organophosphate metabolic process	14.404	9.02678e-12	EFR3B, PMPCB, COX8A, TMEM150A, UQCR10, HDHD1, PDHB, PDHA1, FLAD1, NDUFAF7, NME6, ACAT1, PDHX, NDUFS7, STOML2, SDHC, ATP5O, PRDX5, BAD, ATP5B, DNM1L, MPC1, PTPMT1, MDH1, COX4I1, SERAC1, SURF1, CHCHD10, P2RY1, PPIF, UCKL1, HDDC3, MPC2, FITM1, PIGX, UQCRFS1, NT5C3B, UQCRC2, UQCRC1, NDUFB11, LPL, ALDH1A1, NDUFA10, NDUFAB1, SCP2, IDI2, NDUFA9, NDUFA8, NAPEPLD, FHIT, SHMT1, PIK3C3, TAZ, PIK3C2B, NDUFA1…
GO:0043436	oxoacid metabolic process	11.5894	1.55997e-11	CARS2, METTL20, ETFDH, PDHB, ARV1, QRSL1, PDHA1, ACADM, GLUD1, ACAD9, ACAT1, PDHX, RGN, ETFB, DECR1, GCAT, DBT, SDHB, GSTZ1, PHYH, CBR4, LIAS, ETFA, MPC1, GOT2, MDH1, GOT1, MARC2, ACOT8, ADHFE1, MUT, ASPA, MPC2, CMAS, AUH, LYPLA1, L2HGDH, DARS2, LPL, LTA4H, DLST, MECR, ME3, NDUFAB1, SCP2, PET112, FH, SHMT1, NARS, ALKBH7, PNKD, BCKDHB, PTGR2, ME2, PEX7, DLD, PSPH, DLAT, PCCA, NDUFS6, HIBADH, GLO1,…
GO:0072521	purine-containing compound metabolic process	9.43709	2.87033e-11	PMPCB, COX8A, UQCR10, NDUFAF7, NME6, ACAT1, NDUFS7, SDHC, STOML2, ATP5O, BAD, ATP5B, DNM1L, COX4I1, SURF1, CHCHD10, PPIF, HDDC3, UQCRFS1, UQCRC2, UQCRC1, NDUFB11, NDUFA10, NDUFAB1, NDUFA9, NDUFA8, FHIT, SHMT1, TAZ, ATP5G3, NDUFA11, ATP5G1, COQ9, ATP5F1, COX5A, GBAS, NDUFS8, NUDT9, NDUFB10, NDUFC1, NDUFV2, NDUFS1, DLD, NDUFB7, NDUFV1, NDUFS6, C11orf83, NDUFB8, ADAL, NDUFS2, ATP5A1, NDUFS3, NDUFB5,…
GO:0019752	carboxylic acid metabolic process	11.4238	3.25484e-11	CARS2, METTL20, ETFDH, PDHB, ARV1, QRSL1, PDHA1, ACADM, GLUD1, ACAD9, ACAT1, PDHX, RGN, ETFB, DECR1, GCAT, DBT, SDHB, GSTZ1, PHYH, CBR4, LIAS, ETFA, MPC1, GOT2, MDH1, GOT1, ACOT8, ADHFE1, MUT, ASPA, MPC2, CMAS, AUH, LYPLA1, L2HGDH, DARS2, LPL, LTA4H, DLST, MECR, ME3, NDUFAB1, SCP2, PET112, FH, SHMT1, NARS, ALKBH7, PNKD, BCKDHB, PTGR2, ME2, PEX7, DLD, DLAT, PSPH, PCCA, NDUFS6, HIBADH, GLO1, TARS, …
GO:0006163	purine nucleotide metabolic process	9.10596	3.25771e-11	PMPCB, COX8A, UQCR10, NDUFAF7, NME6, ACAT1, NDUFS7, SDHC, STOML2, ATP5O, BAD, ATP5B, DNM1L, COX4I1, SURF1, CHCHD10, PPIF, HDDC3, UQCRFS1, UQCRC2, UQCRC1, NDUFB11, NDUFA10, NDUFAB1, NDUFA9, NDUFA8, FHIT, TAZ, ATP5G3, NDUFA11, ATP5G1, COQ9, ATP5F1, COX5A, GBAS, NDUFS8, NUDT9, NDUFB10, NDUFC1, NDUFV2, NDUFS1, DLD, NDUFB7, NDUFV1, C11orf83, NDUFB8, NDUFS6, NDUFS2, ATP5A1, NDUFS3, NDUFB5, CYCS, CYC1, …
GO:0009150	purine ribonucleotide metabolic process	8.77483	4.13883e-11	PMPCB, COX8A, UQCR10, NDUFAF7, NME6, ACAT1, NDUFS7, SDHC, STOML2, ATP5O, BAD, ATP5B, COX4I1, SURF1, CHCHD10, PPIF, HDDC3, UQCRFS1, UQCRC2, UQCRC1, NDUFB11, NDUFA10, NDUFAB1, NDUFA9, NDUFA8, TAZ, ATP5G3, NDUFA11, ATP5G1, COQ9, ATP5F1, COX5A, GBAS, NDUFS8, NUDT9, NDUFB10, NDUFC1, NDUFV2, NDUFS1, DLD, NDUFB7, NDUFV1, C11orf83, NDUFB8, NDUFS6, NDUFS2, ATP5A1, NDUFS3, NDUFB5, CYCS, CYC1, SDHAF2, MCCC2
GO:0009259	ribonucleotide metabolic process	8.9404	5.21562e-11	PMPCB, COX8A, UQCR10, NDUFAF7, NME6, ACAT1, NDUFS7, SDHC, STOML2, ATP5O, BAD, ATP5B, COX4I1, SURF1, CHCHD10, PPIF, UCKL1, HDDC3, UQCRFS1, UQCRC2, UQCRC1, NDUFB11, NDUFA10, NDUFAB1, NDUFA9, NDUFA8, TAZ, ATP5G3, NDUFA11, ATP5G1, COQ9, ATP5F1, COX5A, GBAS, NDUFS8, NUDT9, NDUFB10, NDUFC1, NDUFV2, NDUFS1, DLD, NDUFB7, NDUFV1, C11orf83, NDUFB8, NDUFS6, NDUFS2, ATP5A1, NDUFS3, NDUFB5, CYCS, CYC1, SDHAF2…
GO:0006082	organic acid metabolic process	11.755	1.53167e-10	CARS2, METTL20, ETFDH, PDHB, ARV1, QRSL1, PDHA1, ACADM, GLUD1, ACAD9, ACAT1, PDHX, RGN, ETFB, DECR1, GCAT, DBT, SDHB, GSTZ1, SDHC, PHYH, CBR4, LIAS, ETFA, MPC1, GOT2, MDH1, GOT1, MARC2, ACOT8, ADHFE1, MUT, ASPA, MPC2, CMAS, AUH, LYPLA1, L2HGDH, DARS2, LPL, LTA4H, DLST, MECR, ME3, NDUFAB1, SCP2, PET112, FH, SHMT1, NARS, ALKBH7, PNKD, BCKDHB, PTGR2, ME2, PEX7, DLD, PSPH, DLAT, PCCA, NDUFS6, HIBADH,…
GO:0019693	ribose phosphate metabolic process	8.9404	1.80189e-10	PMPCB, COX8A, UQCR10, NDUFAF7, NME6, ACAT1, NDUFS7, SDHC, STOML2, ATP5O, BAD, ATP5B, COX4I1, SURF1, CHCHD10, PPIF, UCKL1, HDDC3, UQCRFS1, UQCRC2, UQCRC1, NDUFB11, NDUFA10, NDUFAB1, NDUFA9, NDUFA8, TAZ, ATP5G3, NDUFA11, ATP5G1, COQ9, ATP5F1, COX5A, GBAS, NDUFS8, NUDT9, NDUFB10, NDUFC1, NDUFV2, NDUFS1, DLD, NDUFB7, NDUFV1, C11orf83, NDUFB8, NDUFS6, NDUFS2, ATP5A1, NDUFS3, NDUFB5, CYCS, CYC1, SDHAF2…
GO:0070125	mitochondrial translational elongation	3.64238	3.34922e-08	MRPL19, MRPS12, MRPL44, MRPS22, MRPS17, ICT1, MRPS7, MRPS35, MRPL41, MRPS18A, MRPS5, MRPL22, MRPS18B, TSFM, MRPS9, MRPL16, MRPL35, GFM1, MRPS24, MRPS15, PTCD3, GFM2
GO:1990542	mitochondrial transmembrane transport	3.1457	4.63657e-08	TIMM13, ATP5B, TOMM40L, C2orf47, MICU2, MPC1, MCUR1, GRPEL1, ATP5A1, TIMM21, CYC1, MRS2, MPC2, STOML2, ATP5O, TIMM17A, ATP5G3, ATP5G1, ATP5F1
GO:0016054	organic acid catabolic process	4.80132	5.13419e-08	METTL20, DLST, ETFDH, SCP2, ACADM, GLUD1, ACAD9, ACAT1, ETFB, SHMT1, DBT, GCAT, DECR1, GSTZ1, PHYH, ETFA, BCKDHB, PEX7, GOT2, DLD, PCCA, HIBADH, GOT1, ACOT8, MUT, ASPA, ECI2, MCCC2, AUH
GO:0051188	cofactor biosynthetic process	4.80132	8.04259e-08	PCBD2, PDHB, NUBP1, FLAD1, PDHA1, NDUFA9, COQ6, COQ2, PDHX, ACAT1, COQ3, ISCA1, LIAS, COQ9, PDSS1, MPC1, DLD, DLAT, PPT2, ISCU, ACOT8, SUCLA2, NADK2, MPC2, COQ10A, HMBS, UROD, LIPT2, ISCA2
GO:0046395	carboxylic acid catabolic process	4.4702	8.76163e-08	METTL20, DLST, ETFDH, SCP2, ACADM, GLUD1, ACAD9, ACAT1, ETFB, SHMT1, DECR1, GCAT, GSTZ1, PHYH, ETFA, PEX7, DLD, GOT2, PCCA, HIBADH, GOT1, ACOT8, MUT, ASPA, ECI2, MCCC2, AUH
GO:0044282	small molecule catabolic process	5.96026	1.18814e-07	METTL20, DLST, ETFDH, ALDH1A1, GALE, SCP2, ACADM, GLUD1, ACAD9, ACAT1, ETFB, SHMT1, DBT, BDH1, GCAT, DECR1, GSTZ1, PHYH, BAD, ETFA, PNKD, BCKDHB, RBKS, NUDT9, PEX7, DLD, GOT2, PCCA, HIBADH, GOT1, ACOT8, MUT, ASPA, ECI2, MCCC2, AUH
GO:0043623	cellular protein complex assembly	8.44371	2.59529e-07	COX19, UQCR10, VAMP3, NDUFAF7, ACAD9, OXA1L, NDUFS7, COPS8, HCCS, NDUFAF6, DNM1L, SURF1, SMIM20, MKKS, CLASP2, NDUFB11, NDUFA10, NDUFAB1, NDUFA9, VDAC2, NDUFA8, ATPAF1, COX14, MSRB2, TAZ, C17orf89, NDUFA11, TIMMDC1, LDLRAD4, NDUFB10, NDUFS8, NDUFC1, NDUFS1, NDUFV2, FOXRED1, NDUFB7, NDUFV1, C11orf83, NDUFB8, NDUFS6, NDUFS2, CAV3, UQCC1, NDUFS3, NDUFB5, TIMM21, NDUFAF3, ARPC5L, COX11, ATPAF2, AIFM1
GO:0051186	cofactor metabolic process	6.62252	1.31197e-06	DLST, PCBD2, PDHB, NUBP1, PDHA1, FLAD1, NDUFA9, COQ6, COQ2, PDHX, ACAT1, SHMT1, COQ3, PRDX5, CBR4, ISCA1, LIAS, COQ9, ME2, PDSS1, MPC1, DLD, MDH1, DLAT, PCCA, PPT2, ISCU, HMOX2, ACOT8, SUCLG1, SUCLA2, NADK2, SUCLG2, MPC2, MCCC2, COQ10A, UROD, HMBS, LIPT2, ISCA2
GO:0032787	monocarboxylic acid metabolic process	7.28477	1.32465e-06	METTL20, LPL, LTA4H, DLST, ETFDH, ME3, MECR, PDHB, ARV1, NDUFAB1, PDHA1, SCP2, ACADM, ACAD9, PDHX, ACAT1, RGN, ETFB, DBT, DECR1, PHYH, CBR4, ALKBH7, LIAS, ETFA, PNKD, BCKDHB, PTGR2, ME2, PEX7, MPC1, DLD, DLAT, PCCA, NDUFS6, GLO1, ACOT8, MUT, MPC2, ECI2, MCCC2, LIPT2, AUH, LYPLA1
GO:0070126	mitochondrial translational termination	3.31126	1.42207e-06	MRPL19, MRPS12, MRPL44, MRPS22, MRPS17, ICT1, MRPS7, MRPS35, MRPL41, MRPS18A, MRPS5, MRPL22, MRPS18B, MRPS9, MRPL16, MRPL35, MRPS24, MRPS15, PTCD3, GFM2
GO:0006099	tricarboxylic acid cycle	1.98675	1.47067e-06	FH, DLST, SUCLG1, SUCLA2, SDHB, PDHB, SDHC, SUCLG2, DLD, PDHA1, MDH1, DLAT
GO:0046487	glyoxylate metabolic process	1.82119	1.81586e-06	BCKDHB, DLST, DBT, PDHB, NDUFAB1, DLD, PDHA1, DLAT, LIPT2, LIAS, PDHX
GO:0043648	dicarboxylic acid metabolic process	2.64901	2.77227e-06	ME2, ME3, DLD, GOT2, MDH1, GLUD1, GOT1, FH, ADHFE1, SUCLG1, ACOT8, SUCLA2, SDHB, SUCLG2, ASPA, L2HGDH
GO:0006414	translational elongation	3.97351	4.2595e-06	CPEB3, MRPL19, MRPS12, MRPL44, MRPS22, EEF1G, MRPS17, ICT1, MRPS7, MRPS35, MRPL41, MRPS18A, MRPS5, MRPL22, MRPS18B, TSFM, MRPS9, MRPL16, MRPL35, GFM1, MRPS24, MRPS15, PTCD3, GFM2
GO:1901566	organonitrogen compound biosynthetic process	14.7351	4.43134e-06	CARS2, HDHD1, EIF2D, PCBD2, EEF1G, FLAD1, QRSL1, MRPS17, ACADM, MRPS7, GLUD1, NME6, ACAT1, MRPS18B, EIF3K, STOML2, GSTZ1, ATP5O, EIF4EBP1, GFM2, SLC25A19, CPEB3, ATP5B, GOT2, MMACHC, ICT1, SURF1, MRPS35, GOT1, CHCHD10, MRPL41, UCKL1, TSFM, ASPA, GGCT, GFM1, GSTM3, HMBS, UROD, HNRNPA2B1, CNOT7, PTCD3, MRPL19, DARS2, SLC25A30, HS3ST5, MRP63, SLC25A3, MRPS12, MRPL44, MRPS22, MTERFD2, GSTK1, PET112, …
GO:0006415	translational termination	3.31126	7.00886e-06	MRPL19, MRPS12, MRPL44, MRPS22, MRPS17, ICT1, MRPS7, MRPS35, MRPL41, MRPS18A, MRPS5, MRPL22, MRPS18B, MRPS9, MRPL16, MRPL35, MRPS24, MRPS15, PTCD3, GFM2
GO:0009108	coenzyme biosynthetic process	3.64238	1.03795e-05	PDSS1, MPC1, PDHB, PCBD2, FLAD1, PDHA1, DLD, NDUFA9, DLAT, COQ6, PPT2, COQ2, PDHX, ACAT1, ACOT8, COQ3, NADK2, MPC2, COQ10A, LIPT2, LIAS, COQ9
GO:0006631	fatty acid metabolic process	5.46358	1.19744e-05	LPL, METTL20, LTA4H, MECR, ETFDH, PDHB, NDUFAB1, PDHA1, SCP2, ACADM, ACAD9, PDHX, ACAT1, RGN, ETFB, DECR1, PHYH, CBR4, ALKBH7, LIAS, ETFA, PTGR2, PEX7, DLD, DLAT, PCCA, NDUFS6, ACOT8, MUT, ECI2, AUH, LIPT2, LYPLA1
GO:0006839	mitochondrial transport	5.29801	1.76685e-05	SLC25A30, TIMM13, C2orf47, MFF, VDAC1, BNIP3, MTERFD2, KIAA1279, MRS2, MTX2, STOML2, ATP5O, BAD, ALKBH7, TIMM17A, ATP5G3, RHOU, ATP5G1, ATP5F1, ATP5B, TOMM40L, MICU2, MPC1, MCUR1, GRPEL1, SLC25A12, ATP5A1, PPIF, TIMM21, CYC1, SIVA1, MPC2
GO:0006518	peptide metabolic process	10.2649	7.66681e-05	CARS2, EIF2D, EEF1G, QRSL1, MRPS17, MRPS7, MRPS18B, EIF3K, GSTZ1, EIF4EBP1, SLC25A19, GFM2, CPEB3, MMACHC, ICT1, MRPS35, MRPL41, TSFM, ETHE1, GGCT, GFM1, GSTM3, HNRNPA2B1, CNOT7, PTCD3, SLC25A30, DARS2, MRPL19, C9orf41, MRP63, LTA4H, MRPS12, SLC25A3, MRPL44, MRPS22, MTERFD2, GSTK1, PET112, MRPS18A, MRPS5, MRPS9, NARS, RMND1, EIF2B3, MRPS15, C9orf3, SLC25A11, CNOT6, MTG1, SLC25A12, UQCC1, GLO1, SL…
GO:0006122	mitochondrial electron transport, ubiquinol to cytochrome c	1.3245	9.60305e-05	PMPCB, CYC1, UQCR10, CYCS, C11orf83, UQCRFS1, UQCRC2, UQCRC1
GO:0061732	mitochondrial acetyl-CoA biosynthetic process from pyruvate	0.993377	9.73078e-05	MPC1, PDHB, MPC2, DLD, PDHA1, PDHX
GO:0006732	coenzyme metabolic process	5.13245	0.000128457	DLST, PCBD2, PDHB, FLAD1, PDHA1, NDUFA9, COQ6, COQ2, PDHX, ACAT1, SHMT1, COQ3, PRDX5, LIAS, COQ9, ME2, PDSS1, MPC1, DLD, MDH1, DLAT, PPT2, SUCLG1, ACOT8, SUCLA2, NADK2, MPC2, SUCLG2, MCCC2, COQ10A, LIPT2
GO:0007007	inner mitochondrial membrane organization	1.49007	0.000130273	TIMM13, CHCHD3, C2orf47, APOO, C19orf70, TAZ, C11orf83, APOOL, IMMT
GO:0006086	acetyl-CoA biosynthetic process from pyruvate	1.15894	0.000134382	MPC1, PDHB, MPC2, DLD, PDHA1, DLAT, PDHX
GO:0009062	fatty acid catabolic process	2.64901	0.000134583	METTL20, PEX7, ETFDH, SCP2, PCCA, ACADM, ACAD9, ACAT1, ETFB, ACOT8, DECR1, MUT, PHYH, ECI2, AUH, ETFA
GO:1902600	hydrogen ion transmembrane transport	2.81457	0.000142032	COX8A, COX5A, ATP5B, UQCR10, COX4I1, SURF1, ATP5A1, CYC1, STOML2, ATP5O, COX11, ATP6V1E1, ATP5G3, ATP5G1, UQCRFS1, ATP5F1, UQCRC1
GO:0071822	protein complex subunit organization	15.5629	0.000149102	COX19, UQCR10, PCBD2, MRPS17, VAMP3, MRPS7, NDUFAF7, ACAD9, ACAT1, OXA1L, NDUFS7, MRPS18B, COPS8, DECR1, STOML2, NDUFAF6, HCCS, EIF4EBP1, BAD, CBR4, GFM2, SH3BGR, DNM1L, ICT1, SMIM20, SURF1, XPA, MRPS35, MRPL41, TRAPPC5, MKKS, CLASP2, PTCD3, MRPL19, NDUFB11, MRPS12, MRPL44, MRPS22, NDUFA10, KCNB1, NDUFAB1, MFF, NDUFA9, NDUFA8, CENPL, VDAC2, BNIP3, ATPAF1, COX14, MRPS5, MRPS18A, MSRB2, FH, SHMT1, …
GO:0006085	acetyl-CoA biosynthetic process	1.3245	0.000155349	MPC1, PDHB, MPC2, DLD, PDHA1, DLAT, PDHX, ACAT1
GO:0009142	nucleoside triphosphate biosynthetic process	2.48344	0.000160297	ATP5B, GBAS, C11orf83, SURF1, NME6, ATP5A1, CHCHD10, UCKL1, CYC1, SUCLG1, STOML2, ATP5O, ATP5G3, ATP5G1, ATP5F1
GO:0009201	ribonucleoside triphosphate biosynthetic process	2.31788	0.000191756	ATP5B, UCKL1, CYC1, GBAS, STOML2, ATP5O, C11orf83, ATP5G3, SURF1, ATP5G1, ATP5A1, NME6, ATP5F1, CHCHD10
GO:0072329	monocarboxylic acid catabolic process	2.64901	0.000287894	METTL20, PEX7, ETFDH, SCP2, PCCA, ACADM, ACAD9, ACAT1, ETFB, ACOT8, DECR1, MUT, PHYH, ECI2, AUH, ETFA
GO:0006754	ATP biosynthetic process	1.98675	0.000288541	ATP5B, CYC1, GBAS, STOML2, ATP5O, C11orf83, ATP5G3, SURF1, ATP5G1, ATP5A1, ATP5F1, CHCHD10
GO:0034622	cellular macromolecular complex assembly	10.596	0.000305079	COX19, UQCR10, EIF2D, VAMP3, MRPS7, NDUFAF7, ACAD9, NDUFS7, OXA1L, COPS8, EIF3K, HCCS, NDUFAF6, DNM1L, UBB, SURF1, SMIM20, XPA, MKKS, CLASP2, CNOT7, NDUFB11, GEMIN7, NDUFA10, NDUFAB1, NDUFA9, VDAC2, CENPL, NDUFA8, MTERFD2, ATPAF1, COX14, MSRB2, TAZ, USP4, C17orf89, NDUFA11, TIMMDC1, CNOT6, LDLRAD4, NDUFS8, NDUFB10, NDUFC1, NDUFV2, NDUFS1, NDUFV1, FOXRED1, NDUFB7, NDUFS6, C11orf83, NDUFB8, NDUFS2,…
GO:0009206	purine ribonucleoside triphosphate biosynthetic process	2.15232	0.000316586	ATP5B, CYC1, GBAS, STOML2, ATP5O, C11orf83, ATP5G3, SURF1, ATP5G1, ATP5A1, NME6, ATP5F1, CHCHD10
GO:1901135	carbohydrate derivative metabolic process	11.755	0.000317061	PMPCB, COX8A, UQCR10, HDHD1, NDUFAF7, NME6, ACAT1, NDUFS7, SIRT5, STOML2, SDHC, ATP5O, BAD, CBR4, ATP5B, DNM1L, COX4I1, SURF1, CHCHD10, PPIF, UCKL1, HDDC3, ACOT8, PIGX, UQCRFS1, UQCRC2, UQCRC1, NDUFB11, HS3ST5, ALDH1A1, EGFLAM, NDUFA10, NDUFAB1, NDUFA9, NDUFA8, SHMT1, VEGFB, TAZ, NDUFA11, ATP5G3, ATP5G1, COQ9, ATP5F1, COX5A, GBAS, FBXO6, NDUFS8, NUDT9, NDUFB10, NDUFC1, NDUFV2, NDUFS1, DLD, NDUFV1…
GO:0009145	purine nucleoside triphosphate biosynthetic process	2.15232	0.000384541	ATP5B, CYC1, GBAS, STOML2, ATP5O, C11orf83, ATP5G3, SURF1, ATP5G1, ATP5A1, NME6, ATP5F1, CHCHD10
GO:0006818	hydrogen transport	3.1457	0.000398272	COX8A, COX5A, ATP5B, UQCR10, COX4I1, SURF1, ATP5A1, PPIF, CYC1, ADHFE1, STOML2, ATP5O, COX11, ATP6V1E1, ATP5G3, UQCRFS1, ATP5G1, ATP5F1, UQCRC1
GO:0006412	translation	8.60927	0.000416314	CARS2, EIF2D, EEF1G, MRPS17, QRSL1, MRPS7, MRPS18B, EIF3K, EIF4EBP1, SLC25A19, GFM2, CPEB3, ICT1, MRPS35, MRPL41, TSFM, GFM1, HNRNPA2B1, CNOT7, PTCD3, SLC25A30, DARS2, MRPL19, MRP63, MRPS12, SLC25A3, MRPL44, MRPS22, MTERFD2, PET112, MRPS18A, MRPS5, MRPS9, NARS, RMND1, EIF2B3, MRPS15, SLC25A11, CNOT6, MTG1, SLC25A12, UQCC1, SLC25A4, EIF1B, TARS, MRPL22, MTIF2, MRPL16, MRPL35, HARS2, MRPS24, BOLL
GO:0006790	sulfur compound metabolic process	5.13245	0.000435842	HS3ST5, DLST, EGFLAM, PDHB, NUBP1, EEF1G, PDHA1, GSTK1, PDHX, ACAT1, TXN2, GSTZ1, ISCA1, MPC1, DLD, DLAT, MMACHC, PPT2, HYAL1, GLO1, ISCU, SUCLG1, ACOT8, SUCLA2, ETHE1, MUT, MPC2, SUCLG2, GGCT, GSTM3, ISCA2
GO:0042407	cristae formation	1.15894	0.000437989	CHCHD3, APOO, C19orf70, TAZ, C11orf83, APOOL, IMMT
GO:0043043	peptide biosynthetic process	8.77483	0.000451869	CARS2, EIF2D, EEF1G, MRPS17, QRSL1, MRPS7, MRPS18B, EIF3K, EIF4EBP1, SLC25A19, GFM2, CPEB3, ICT1, MRPS35, MRPL41, TSFM, GFM1, GGCT, HNRNPA2B1, CNOT7, PTCD3, SLC25A30, DARS2, MRPL19, MRP63, MRPS12, SLC25A3, MRPL44, MRPS22, MTERFD2, PET112, MRPS18A, MRPS5, MRPS9, NARS, RMND1, EIF2B3, MRPS15, SLC25A11, CNOT6, MTG1, SLC25A12, UQCC1, SLC25A4, EIF1B, TARS, MRPL22, MTIF2, MRPL16, MRPL35, HARS2, MRPS24, …
GO:0006084	acetyl-CoA metabolic process	1.49007	0.00049021	DLST, MPC1, PDHB, MPC2, DLD, PDHA1, DLAT, PDHX, ACAT1
GO:0017004	cytochrome complex assembly	1.65563	0.000493035	COX14, TIMM21, COX19, UQCR10, COX11, HCCS, C11orf83, SURF1, SMIM20, UQCC1
GO:0042776	mitochondrial ATP synthesis coupled proton transport	1.3245	0.000836259	ATP5B, CYC1, STOML2, ATP5O, ATP5G3, ATP5G1, ATP5A1, ATP5F1
GO:0006635	fatty acid beta-oxidation	2.15232	0.000903279	ETFB, METTL20, ACOT8, ETFDH, PEX7, DECR1, SCP2, ECI2, AUH, ACADM, ETFA, ACAD9, ACAT1
GO:0015992	proton transport	2.98013	0.00108738	COX8A, COX5A, ATP5B, UQCR10, COX4I1, SURF1, ATP5A1, PPIF, CYC1, STOML2, ATP5O, COX11, ATP6V1E1, ATP5G3, UQCRFS1, ATP5G1, ATP5F1, UQCRC1
GO:0006637	acyl-CoA metabolic process	2.31788	0.00111972	DLST, PDHB, MPC1, PDHA1, DLD, DLAT, PPT2, PDHX, ACAT1, SUCLG1, ACOT8, SUCLA2, SUCLG2, MPC2
GO:0035383	thioester metabolic process	2.31788	0.00111972	DLST, PDHB, MPC1, PDHA1, DLD, DLAT, PPT2, PDHX, ACAT1, SUCLG1, ACOT8, SUCLA2, SUCLG2, MPC2
GO:0043603	cellular amide metabolic process	10.7616	0.00130782	CARS2, EIF2D, EEF1G, QRSL1, MRPS17, MRPS7, MRPS18B, EIF3K, GSTZ1, EIF4EBP1, GFM2, SLC25A19, CPEB3, MMACHC, ICT1, MRPS35, MRPL41, TSFM, ETHE1, GGCT, GFM1, GSTM3, HNRNPA2B1, CNOT7, PTCD3, MRPL19, SLC25A30, DARS2, C9orf41, MRP63, MRPS12, LTA4H, SLC25A3, MRPL44, TACO1, MRPS22, MTERFD2, GSTK1, PET112, MRPS18A, MRPS5, SHMT1, MRPS9, NARS, RMND1, EIF2B3, MRPS15, C9orf3, SLC25A11, CNOT6, DLD, MTG1, SLC25A…
GO:0044242	cellular lipid catabolic process	3.1457	0.00175132	LPL, METTL20, PEX7, ETFDH, SCP2, PCCA, ACADM, ACAD9, ACAT1, NAPEPLD, ETFB, ACOT8, DECR1, MUT, PHYH, ECI2, PNPLA4, AUH, ETFA
GO:0006744	ubiquinone biosynthetic process	1.15894	0.00186655	PDSS1, COQ3, NDUFA9, COQ6, COQ10A, COQ2, COQ9
GO:1901663	quinone biosynthetic process	1.15894	0.00186655	PDSS1, COQ3, NDUFA9, COQ6, COQ10A, COQ2, COQ9
GO:0043624	cellular protein complex disassembly	3.64238	0.00200753	MRPL19, MRPS12, MRPL44, MRPS22, MRPS17, ICT1, MRPS7, MRPS35, MRPL41, MRPS18A, MRPS5, MRPL22, MRPS18B, MAP6D1, MRPS9, MRPL16, MRPL35, CLASP2, MRPS24, MRPS15, PTCD3, GFM2
GO:0018065	protein-cofactor linkage	0.993377	0.00229107	GLRX5, SDHAF2, NDUFAB1, HMBS, LIPT2, LIAS
GO:0042451	purine nucleoside biosynthetic process	2.48344	0.0027315	ATP5B, CYC1, GBAS, STOML2, ATP5O, C11orf83, ADAL, ATP5G3, SURF1, ATP5G1, ATP5A1, NME6, ATP5F1, CHCHD10, ACAT1
GO:0046129	purine ribonucleoside biosynthetic process	2.48344	0.0027315	ATP5B, CYC1, GBAS, STOML2, ATP5O, C11orf83, ADAL, ATP5G3, SURF1, ATP5G1, ATP5A1, NME6, ATP5F1, CHCHD10, ACAT1
GO:0006743	ubiquinone metabolic process	1.15894	0.00274513	PDSS1, COQ3, NDUFA9, COQ6, COQ10A, COQ2, COQ9
GO:0043604	amide biosynthetic process	8.77483	0.00303491	CARS2, EIF2D, EEF1G, MRPS17, QRSL1, MRPS7, MRPS18B, EIF3K, EIF4EBP1, SLC25A19, GFM2, CPEB3, ICT1, MRPS35, MRPL41, TSFM, GFM1, GGCT, HNRNPA2B1, CNOT7, PTCD3, SLC25A30, DARS2, MRPL19, MRP63, MRPS12, SLC25A3, MRPL44, MRPS22, MTERFD2, PET112, MRPS18A, MRPS5, MRPS9, NARS, RMND1, EIF2B3, MRPS15, SLC25A11, CNOT6, MTG1, SLC25A12, UQCC1, SLC25A4, EIF1B, TARS, MRPL22, MTIF2, MRPL16, MRPL35, HARS2, MRPS24, …
GO:0044283	small molecule biosynthetic process	5.46358	0.00303494	LPL, LTA4H, MECR, ARV1, NDUFAB1, SCP2, NDUFA9, IDI2, COQ6, GLUD1, COQ2, ACAT1, RGN, SHMT1, BDH1, COQ3, CBR4, LIAS, COQ9, SLC25A11, PDSS1, GOT2, MDH1, PSPH, MMACHC, SLC25A12, GOT1, P2RY1, ACOT8, SUCLA2, ASPA, COQ10A, LIPT2
GO:0009163	nucleoside biosynthetic process	2.81457	0.00317973	ATP5B, GBAS, HDHD1, C11orf83, ADAL, SURF1, ATP5A1, NME6, ACAT1, CHCHD10, UCKL1, CYC1, STOML2, ATP5O, ATP5G3, ATP5G1, ATP5F1
GO:0019395	fatty acid oxidation	2.31788	0.00372521	METTL20, PEX7, ETFDH, SCP2, ACADM, ACAD9, ACAT1, ETFB, ACOT8, DECR1, PHYH, ECI2, AUH, ETFA
GO:1901659	glycosyl compound biosynthetic process	2.81457	0.00387517	ATP5B, GBAS, HDHD1, C11orf83, ADAL, SURF1, ATP5A1, NME6, ACAT1, CHCHD10, UCKL1, CYC1, STOML2, ATP5O, ATP5G3, ATP5G1, ATP5F1
GO:0006796	phosphate-containing compound metabolic process	22.5166	0.00411992	EFR3B, STRADB, UQCR10, HDHD1, ARHGEF6, PDHB, PDHA1, RPS6KC1, SMG8, JTB, NME6, ACAT1, MAP2K4, NDUFS7, COPS8, TPD52L1, ATP5O, PRDX5, MDH1, COX4I1, CNEP1R1, P2RY1, HDDC3, FITM1, NT5C3B, TRPT1, NDUFB11, LPL, DUSP13, CPPED1, ALDH1A1, NAPEPLD, FHIT, SHMT1, PHPT1, VEGFB, LAMTOR1, ATP5G3, ATP5G1, ATP5F1, COX5A, CDK15, GBAS, RBKS, NUDT9, STYX, PHB, TBRG4, ADAL, ATP5A1, CYCS, GALK2, PRDX3, SDHAF2, MCCC2, P…
GO:0034440	lipid oxidation	2.31788	0.00413207	METTL20, PEX7, ETFDH, SCP2, ACADM, ACAD9, ACAT1, ETFB, ACOT8, DECR1, PHYH, ECI2, AUH, ETFA
GO:0042455	ribonucleoside biosynthetic process	2.64901	0.00447874	ATP5B, GBAS, C11orf83, ADAL, SURF1, NME6, ATP5A1, ACAT1, CHCHD10, UCKL1, CYC1, STOML2, ATP5O, ATP5G3, ATP5G1, ATP5F1
GO:0006793	phosphorus metabolic process	22.5166	0.0045048	EFR3B, STRADB, UQCR10, HDHD1, ARHGEF6, PDHB, PDHA1, RPS6KC1, SMG8, JTB, NME6, ACAT1, MAP2K4, NDUFS7, COPS8, TPD52L1, ATP5O, PRDX5, MDH1, COX4I1, CNEP1R1, P2RY1, HDDC3, FITM1, NT5C3B, TRPT1, NDUFB11, LPL, DUSP13, CPPED1, ALDH1A1, NAPEPLD, FHIT, SHMT1, PHPT1, VEGFB, LAMTOR1, ATP5G3, ATP5G1, ATP5F1, COX5A, CDK15, GBAS, RBKS, NUDT9, STYX, PHB, TBRG4, ADAL, ATP5A1, CYCS, GALK2, PRDX3, SDHAF2, MCCC2, P…
GO:0009063	cellular amino acid catabolic process	1.82119	0.00507738	DLST, SHMT1, GCAT, GSTZ1, ASPA, GOT2, DLD, MCCC2, AUH, HIBADH, GOT1
GO:0009083	branched-chain amino acid catabolic process	1.15894	0.00525122	BCKDHB, DBT, DLD, MCCC2, AUH, HIBADH, ACAT1
GO:0015986	ATP synthesis coupled proton transport	1.3245	0.00646202	ATP5B, CYC1, STOML2, ATP5O, ATP5G3, ATP5G1, ATP5A1, ATP5F1
GO:0015985	energy coupled proton transport, down electrochemical gradient	1.3245	0.00646202	ATP5B, CYC1, STOML2, ATP5O, ATP5G3, ATP5G1, ATP5A1, ATP5F1
GO:0032984	macromolecular complex disassembly	4.13907	0.00679511	MRPL19, MRPS12, MRPL44, MRPS22, EIF2D, MRPS17, ICT1, BNIP3, MRPS7, MRPS35, MRPL41, MRPS18A, MRPS5, MAP6D1, MRPS18B, MRPL22, MTIF2, MRPS9, MRPL16, MRPL35, CLASP2, MRPS15, MRPS24, PTCD3, GFM2
GO:0009124	nucleoside monophosphate biosynthetic process	2.31788	0.00727234	ATP5B, UCKL1, CYC1, GBAS, SHMT1, STOML2, ATP5O, C11orf83, ATP5G3, SURF1, ATP5G1, ATP5A1, ATP5F1, CHCHD10
GO:0009068	aspartate family amino acid catabolic process	0.993377	0.00875483	DLST, GCAT, ASPA, GOT2, DLD, GOT1
GO:0042180	cellular ketone metabolic process	3.47682	0.00875924	PNKD, METTL20, PDSS1, PDHB, PDHA1, DLD, GOT2, SCP2, NDUFA9, DLAT, COQ6, COQ2, PDHX, GLO1, RGN, SIRT5, COQ3, COQ10A, DHRS4, CBR4, COQ9
GO:1901661	quinone metabolic process	1.3245	0.0102058	PDSS1, COQ3, NDUFA9, COQ6, COQ10A, CBR4, COQ2, COQ9
GO:1901606	alpha-amino acid catabolic process	1.65563	0.0103769	DLST, SHMT1, GCAT, GSTZ1, ASPA, GOT2, DLD, GLUD1, GOT1, ACAT1
GO:0009156	ribonucleoside monophosphate biosynthetic process	2.15232	0.0114887	ATP5B, UCKL1, CYC1, GBAS, STOML2, ATP5O, C11orf83, ATP5G3, SURF1, ATP5G1, ATP5A1, ATP5F1, CHCHD10
GO:0044255	cellular lipid metabolic process	8.9404	0.0118034	EFR3B, METTL20, TMEM150A, ETFDH, PDHB, ARV1, PDHA1, ACADM, COQ2, ACAD9, PDHX, ACAT1, RGN, ETFB, DECR1, STOML2, PHYH, CBR4, ETFA, LIAS, PTPMT1, SERAC1, CNEP1R1, ACOT8, MUT, FITM1, AUH, PIGX, LYPLA1, LPL, LTA4H, ALDH1A1, MECR, NDUFAB1, SCP2, IDI2, ABHD1, NAPEPLD, PIK3C3, TAZ, PIK3C2B, DHRS4, ALKBH7, PTGR2, PDSS1, PEX7, DLD, DLAT, PCCA, NDUFS6, CAV3, ECI2, PNPLA4, LIPT2
GO:0044712	single-organism catabolic process	7.78146	0.0119913	METTL20, LPL, DLST, ETFDH, ALDH1A1, GALE, SCP2, HRASLS, ACADM, GLUD1, ACAD9, ACAT1, NAPEPLD, ETFB, SHMT1, DBT, DECR1, BDH1, GCAT, RNF5, GSTZ1, PHYH, BAD, ETFA, PNKD, BCKDHB, FBXO6, RBKS, NUDT9, PEX7, C7orf55, DLD, GOT2, PCCA, ADAL, HIBADH, DCTPP1, GOT1, HMOX2, ACOT8, VIMP, MUT, ASPA, MCCC2, ECI2, PNPLA4, AUH
GO:0016042	lipid catabolic process	3.47682	0.0121394	LPL, METTL20, PEX7, ETFDH, C7orf55, SCP2, PCCA, HRASLS, ACADM, ACAD9, ACAT1, NAPEPLD, ETFB, ACOT8, DECR1, MUT, PHYH, ECI2, PNPLA4, AUH, ETFA
GO:0006733	oxidoreduction coenzyme metabolic process	2.64901	0.0121455	PDSS1, PDHB, MPC1, PDHA1, DLD, MDH1, NDUFA9, COQ6, COQ2, PDHX, COQ3, NADK2, MPC2, PRDX5, COQ10A, COQ9
GO:0009081	branched-chain amino acid metabolic process	1.15894	0.0121586	BCKDHB, DBT, DLD, MCCC2, AUH, HIBADH, ACAT1
GO:0009168	purine ribonucleoside monophosphate biosynthetic process	1.98675	0.0123313	ATP5B, CYC1, GBAS, STOML2, ATP5O, C11orf83, ATP5G3, SURF1, ATP5G1, ATP5A1, ATP5F1, CHCHD10
GO:0009127	purine nucleoside monophosphate biosynthetic process	1.98675	0.0123313	ATP5B, CYC1, GBAS, STOML2, ATP5O, C11orf83, ATP5G3, SURF1, ATP5G1, ATP5A1, ATP5F1, CHCHD10
GO:0042181	ketone biosynthetic process	1.3245	0.0149157	PDSS1, COQ3, SCP2, NDUFA9, COQ6, COQ10A, COQ2, COQ9
GO:0070271	protein complex biogenesis	12.0861	0.0163576	COX19, UQCR10, PCBD2, VAMP3, NDUFAF7, ACAD9, ACAT1, NDUFS7, OXA1L, COPS8, DECR1, STOML2, HCCS, NDUFAF6, EIF4EBP1, BAD, CBR4, SH3BGR, DNM1L, SMIM20, SURF1, XPA, TRAPPC5, MKKS, CLASP2, NDUFB11, C2orf47, KCNB1, NDUFA10, MFF, NDUFAB1, NDUFA9, VDAC2, CENPL, NDUFA8, ATPAF1, COX14, MSRB2, FH, SHMT1, TAZ, DHRS4, NDUFA11, C17orf89, TIMMDC1, LDLRAD4, NDUFS8, NDUFB10, PDSS1, NDUFC1, NDUFV2, NDUFS1, NDUFV1, …
GO:0007006	mitochondrial membrane organization	2.31788	0.0176436	TIMM13, C2orf47, C11orf83, APOOL, IMMT, BNIP3, PPIF, CHCHD3, SIVA1, APOO, C19orf70, TAZ, BAD, ALKBH7
GO:0043241	protein complex disassembly	3.80795	0.0191938	MRPL19, MRPS12, MRPL44, MRPS22, MRPS17, ICT1, BNIP3, MRPS7, MRPS35, MRPL41, MRPS18A, MRPS5, MRPL22, MRPS18B, MAP6D1, MRPS9, MRPL16, MRPL35, CLASP2, MRPS24, MRPS15, PTCD3, GFM2
GO:0071616	acyl-CoA biosynthetic process	1.65563	0.0208328	ACOT8, MPC1, PDHB, MPC2, DLD, PDHA1, DLAT, PPT2, PDHX, ACAT1
GO:0035384	thioester biosynthetic process	1.65563	0.0208328	ACOT8, MPC1, PDHB, MPC2, DLD, PDHA1, DLAT, PPT2, PDHX, ACAT1
GO:0043933	macromolecular complex subunit organization	19.5364	0.0233557	COX19, UQCR10, MRPS17, VAMP3, MRPS7, ACAT1, NDUFS7, OXA1L, COPS8, EIF3K, EIF4EBP1, UBR2, GFM2, TRIM16, MKKS, CLASP2, PTCD3, MRPL19, NDUFB11, GEMIN7, LPL, MRPS12, MRPL44, KCNB1, VDAC2, MRPS18A, FH, MSRB2, SHMT1, TIMMDC1, PDSS1, PHB, SAP18, TIMM21, SNUPN, MRPL22, GTF2F2, NDUFAF3, ARPC5L, MRPL16, MRPL35, MCCC2, WDR61, ATPAF2, PIH1D1, EIF2D, PCBD2, HLTF, SUPT4H1, NDUFAF7, ACAD9, MRPS18B, SIRT5, DECR1…
GO:0006461	protein complex assembly	11.9205	0.0247668	COX19, UQCR10, PCBD2, VAMP3, NDUFAF7, ACAD9, ACAT1, NDUFS7, OXA1L, COPS8, DECR1, STOML2, HCCS, NDUFAF6, EIF4EBP1, BAD, CBR4, SH3BGR, DNM1L, SMIM20, SURF1, XPA, TRAPPC5, MKKS, CLASP2, NDUFB11, KCNB1, NDUFA10, MFF, NDUFAB1, NDUFA9, VDAC2, CENPL, NDUFA8, ATPAF1, COX14, MSRB2, FH, SHMT1, TAZ, DHRS4, NDUFA11, C17orf89, TIMMDC1, LDLRAD4, NDUFS8, NDUFB10, PDSS1, NDUFC1, NDUFV2, NDUFS1, NDUFV1, NDUFB7, F…
GO:0043649	dicarboxylic acid catabolic process	0.827815	0.0279209	ACOT8, ASPA, GOT2, GLUD1, GOT1
GO:0097034	mitochondrial respiratory chain complex IV biogenesis	0.993377	0.0302987	COX14, TIMM21, COX19, C2orf47, SURF1, SMIM20
GO:0033539	fatty acid beta-oxidation using acyl-CoA dehydrogenase	0.993377	0.0302987	ETFB, METTL20, ETFDH, ACADM, ETFA, ACAD9
GO:0006629	lipid metabolic process	10.0993	0.0315241	EFR3B, METTL20, TMEM150A, ETFDH, PDHB, ARV1, PDHA1, ACADM, COQ2, ACAD9, PDHX, ACAT1, RGN, ETFB, DECR1, STOML2, PHYH, CBR4, LIAS, ETFA, ATP5B, PTPMT1, SERAC1, CNEP1R1, HINT2, ACOT8, MUT, FITM1, AUH, PIGX, LYPLA1, LPL, LTA4H, ALDH1A1, MECR, NDUFAB1, SCP2, IDI2, HRASLS, FDX1, ABHD1, NAPEPLD, LAMTOR1, PIK3C3, TAZ, DHRS4, PIK3C2B, ALKBH7, PTGR2, PDSS1, PEX7, C7orf55, DLD, DLAT, PCCA, NDUFS6, CAV3, ATP…
GO:0006520	cellular amino acid metabolic process	3.31126	0.0368379	CARS2, DARS2, DLST, QRSL1, GOT2, DLD, PSPH, HIBADH, GLUD1, GOT1, PET112, TARS, SHMT1, GCAT, ASPA, GSTZ1, NARS, HARS2, MCCC2, AUH
Gene Ontology:- Cellular Component
GO:0005739	mitochondrion	43.3775	2.07366e-86	COX19, METTL20, GHITM, MRPS17, ACADM, MRPS7, JTB, NME6, ACAT1, NDUFS7, FAM210A, GSTZ1, ATP5O, ISCA1, PTCD2, LYRM7, CLYBL, MCUR1, COX4I1, MARC2, HINT2, GFM1, AUH, C21orf33, MRP63, SLC25A3, ME3, MSRB2, SHMT1, BDH1, ATP5G3, ATP5G1, ATP5F1, PHB, AGTPBP1, APOOL, NDUFAF3, MCCC2, ATP6V1E1, PNPLA4, LIPT2, ATPAF2, RTN4IP1, MTFP1, ETFDH, FLAD1, QRSL1, SMIM4, NDUFAF7, ACAD9, PDHX, NUDT8, ETFB, MRPS18B, MRS2…
GO:0044429	mitochondrial part	32.1192	3.0749e-76	CARS2, COX19, UQCR10, METTL20, PDHB, GHITM, MRPS17, PDHA1, NUDT13, COQ6, ACADM, GLUD1, MRPS7, ACAT1, NDUFS7, OXA1L, CHCHD7, TXN2, DBT, GCAT, ATP5O, PRDX5, ISCA1, TFB2M, LIAS, GFM2, SLC25A19, TOMM40L, LYRM7, MCUR1, COX4I1, MARC2, CHCHD3, ISCU, ETHE1, MUT, GFM1, AUH, ISCA2, PTCD3, MRPL19, NDUFB11, MRP63, SLC25A3, C2orf47, MRPS12, MRPL44, ME3, VDAC1, MINOS1, VDAC2, GSTK1, VDAC3, MRPS18A, FH, BDH1, C…
GO:0005743	mitochondrial inner membrane	20.0331	1.91885e-54	UQCR10, GHITM, MRPS17, COQ6, MRPS7, ACAT1, NDUFS7, OXA1L, GCAT, ATP5O, SLC25A19, MCUR1, COX4I1, MARC2, CHCHD3, PTCD3, MRPL19, NDUFB11, SLC25A3, C2orf47, MRPS12, MRPL44, VDAC1, MINOS1, VDAC2, GSTK1, MRPS18A, BDH1, COQ3, ATP5G3, TIMMDC1, ATP5G1, ATP5F1, COX5A, PHB, APOOL, ATP5A1, SLC25A4, TIMM21, MRPL22, CYCS, APOO, NDUFAF3, MRPL16, MRPL35, HIGD2A, TIMM13, MTFP1, PMPCB, COX8A, ETFDH, COQ2, ACAD9, M…
GO:0019866	organelle inner membrane	20.0331	5.26392e-50	UQCR10, GHITM, MRPS17, COQ6, MRPS7, ACAT1, NDUFS7, OXA1L, GCAT, ATP5O, SLC25A19, MCUR1, COX4I1, MARC2, CHCHD3, PTCD3, MRPL19, NDUFB11, SLC25A3, C2orf47, MRPS12, MRPL44, VDAC1, MINOS1, VDAC2, GSTK1, MRPS18A, BDH1, COQ3, ATP5G3, TIMMDC1, ATP5G1, ATP5F1, COX5A, PHB, APOOL, ATP5A1, SLC25A4, TIMM21, MRPL22, CYCS, APOO, NDUFAF3, MRPL16, MRPL35, HIGD2A, TIMM13, MTFP1, PMPCB, COX8A, ETFDH, COQ2, ACAD9, M…
GO:0031966	mitochondrial membrane	21.8543	7.50895e-48	UQCR10, GHITM, MRPS17, COQ6, MRPS7, ACAT1, NDUFS7, OXA1L, GCAT, ATP5O, SLC25A19, TOMM40L, MCUR1, COX4I1, MARC2, CHCHD3, PTCD3, MRPL19, NDUFB11, SLC25A3, C2orf47, MRPS12, MRPL44, VDAC1, MINOS1, VDAC2, VDAC3, GSTK1, MRPS18A, BDH1, COQ3, ATP5G3, TIMMDC1, ATP5G1, ATP5F1, COX5A, PHB, APOOL, ATP5A1, SLC25A4, TIMM21, CYCS, MRPL22, NDUFAF3, APOO, MRPL16, MRPL35, HIGD2A, TIMM13, RTN4IP1, PMPCB, COX8A, MTF…
GO:0005740	mitochondrial envelope	22.5166	8.63028e-48	COX19, UQCR10, GHITM, MRPS17, COQ6, MRPS7, ACAT1, NDUFS7, OXA1L, CHCHD7, GCAT, ATP5O, SLC25A19, TOMM40L, MCUR1, COX4I1, MARC2, CHCHD3, PTCD3, MRPL19, NDUFB11, SLC25A3, C2orf47, MRPS12, MRPL44, VDAC1, MINOS1, VDAC2, VDAC3, GSTK1, MRPS18A, BDH1, COQ3, ATP5G3, TIMMDC1, ATP5G1, ATP5F1, COX5A, PHB, APOOL, ATP5A1, SLC25A4, TIMM21, CYCS, MRPL22, NDUFAF3, APOO, MRPL16, MRPL35, HIGD2A, TIMM13, RTN4IP1, PM…
GO:0005759	mitochondrial matrix	16.7219	7.85195e-42	CARS2, METTL20, PDHB, PDHA1, MRPS17, NUDT13, ACADM, GLUD1, MRPS7, ACAT1, NDUFS7, TXN2, DBT, PRDX5, ISCA1, TFB2M, LIAS, GFM2, LYRM7, ISCU, ETHE1, MUT, GFM1, AUH, ISCA2, MRPL19, MRP63, MRPS12, C2orf47, ME3, VDAC1, VDAC2, GSTK1, MRPS18A, FH, BDH1, COQ3, ATP5F1, GLRX5, BCKDHB, NUDT9, LACTB2, PDSS1, ATP5A1, MRPL22, PRDX3, MRPL16, MRPL35, SDHAF2, HARS2, MCCC2, LIPT2, PMPCB, ETFDH, FLAD1, NDUFAF7, PDHX,…
GO:0098798	mitochondrial protein complex	9.76821	2.79803e-34	TIMM13, PMPCB, COX8A, UQCR10, ETFDH, NDUFS7, ETFB, DBT, SDHB, C19orf70, SDHC, ATP5O, TIMM17A, TOMM40L, ATP5B, COX4I1, GRPEL1, SUPV3L1, PPIF, CHCHD3, UQCRFS1, UQCRC2, UQCRC1, NDUFB11, NDUFA10, NDUFAB1, NDUFA9, MINOS1, NDUFA8, ATP5G3, NDUFA11, ATP5G1, ATP5F1, BCKDHB, COX5A, NDUFS8, NDUFB10, NDUFC1, MICU2, NDUFV2, NDUFS1, NDUFV1, FOXRED1, DLAT, NDUFB7, NDUFS6, C11orf83, NDUFB8, APOOL, NDUFS2, IMMT, …
GO:0031967	organelle envelope	23.6755	7.10407e-31	COX19, UQCR10, GHITM, MRPS17, COQ6, MRPS7, ACAT1, OXA1L, NDUFS7, CHCHD7, GCAT, ATP5O, SLC25A19, TOMM40L, MCUR1, COX4I1, CNEP1R1, MARC2, CHCHD3, PTCD3, MRPL19, NDUFB11, SLC25A3, C2orf47, MRPS12, MRPL44, PLRG1, VDAC1, MINOS1, VDAC2, VDAC3, GSTK1, MRPS18A, BDH1, COQ3, ATP5G3, TIMMDC1, ATP5G1, ATP5F1, COX5A, PHB, APOOL, ATP5A1, SLC25A4, TIMM21, CYCS, MRPL22, SNUPN, NDUFAF3, CACYBP, APOO, MRPL16, MRPL…
GO:0031975	envelope	23.6755	8.10853e-31	COX19, UQCR10, GHITM, MRPS17, COQ6, MRPS7, ACAT1, OXA1L, NDUFS7, CHCHD7, GCAT, ATP5O, SLC25A19, TOMM40L, MCUR1, COX4I1, CNEP1R1, MARC2, CHCHD3, PTCD3, MRPL19, NDUFB11, SLC25A3, C2orf47, MRPS12, MRPL44, PLRG1, VDAC1, MINOS1, VDAC2, VDAC3, GSTK1, MRPS18A, BDH1, COQ3, ATP5G3, TIMMDC1, ATP5G1, ATP5F1, COX5A, PHB, APOOL, ATP5A1, SLC25A4, TIMM21, CYCS, MRPL22, SNUPN, NDUFAF3, CACYBP, APOO, MRPL16, MRPL…
GO:0098800	inner mitochondrial membrane protein complex	8.11258	7.41258e-30	NDUFB11, PMPCB, COX8A, UQCR10, NDUFA10, NDUFAB1, NDUFA9, MINOS1, NDUFA8, NDUFS7, SDHB, SDHC, C19orf70, ATP5O, NDUFA11, TIMM17A, ATP5G3, ATP5G1, ATP5F1, COX5A, ATP5B, NDUFS8, NDUFB10, NDUFC1, MICU2, NDUFV2, NDUFS1, FOXRED1, NDUFV1, NDUFB7, COX4I1, NDUFS6, GRPEL1, NDUFB8, C11orf83, APOOL, NDUFS2, IMMT, NDUFS3, ATP5A1, NDUFB5, PPIF, TIMM21, CYC1, CHCHD3, APOO, UQCRFS1, UQCRC2, UQCRC1
GO:0044455	mitochondrial membrane part	9.76821	8.91914e-30	PMPCB, COX8A, UQCR10, ETFDH, COQ2, OXA1L, NDUFS7, SDHB, C19orf70, SDHC, ATP5O, TIMM17A, TOMM40L, ATP5B, COX4I1, MCUR1, GRPEL1, SURF1, PPIF, CHCHD3, UQCRFS1, UQCRC2, L2HGDH, UQCRC1, NDUFB11, NDUFA10, MFF, NDUFAB1, NDUFA9, MINOS1, NDUFA8, BNIP3, BDH1, ATP5G3, NDUFA11, ATP5G1, ATP5F1, COX5A, NDUFS8, NDUFB10, NDUFC1, MICU2, NDUFV2, NDUFS1, NDUFV1, FOXRED1, NDUFB7, NDUFS6, C11orf83, NDUFB8, APOOL, NDU…
GO:1990204	oxidoreductase complex	6.29139	4.26722e-23	NDUFB11, PMPCB, UQCR10, DLST, NDUFA10, PDHB, NDUFAB1, PDHA1, NDUFA9, NDUFA8, PDHX, NDUFS7, DBT, SDHB, SDHC, CBR4, NDUFA11, BCKDHB, NDUFS8, NDUFB10, NDUFC1, NDUFV2, NDUFS1, DLD, FOXRED1, NDUFV1, DLAT, NDUFB7, NDUFS6, C11orf83, NDUFB8, NDUFS2, NDUFS3, NDUFB5, CYC1, UQCRFS1, UQCRC2, UQCRC1
GO:0070469	respiratory chain	5.96026	8.12481e-23	NDUFB11, PMPCB, COX8A, UQCR10, NDUFA10, NDUFAB1, NDUFA9, NDUFA8, OXA1L, NDUFS7, SDHB, SDHC, NDUFA11, COX5A, NDUFS8, NDUFB10, NDUFC1, NDUFV2, NDUFS1, FOXRED1, NDUFV1, NDUFB7, COX4I1, NDUFS6, C11orf83, NDUFB8, NDUFS2, SURF1, NDUFS3, NDUFB5, CYCS, CYC1, UQCRFS1, HIGD2A, UQCRC2, UQCRC1
GO:0005746	mitochondrial respiratory chain	5.62914	2.08054e-21	NDUFB11, PMPCB, COX8A, UQCR10, NDUFA10, NDUFAB1, NDUFA9, NDUFA8, OXA1L, NDUFS7, SDHB, SDHC, NDUFA11, COX5A, NDUFS8, NDUFB10, NDUFC1, NDUFV2, NDUFS1, FOXRED1, NDUFV1, NDUFB7, COX4I1, NDUFS6, C11orf83, NDUFB8, NDUFS2, SURF1, NDUFS3, NDUFB5, CYC1, UQCRFS1, UQCRC2, UQCRC1
GO:0098803	respiratory chain complex	5.29801	1.03523e-20	NDUFB11, PMPCB, COX8A, UQCR10, NDUFA10, NDUFAB1, NDUFA9, NDUFA8, NDUFS7, SDHB, SDHC, NDUFA11, COX5A, NDUFS8, NDUFB10, NDUFC1, NDUFV2, NDUFS1, FOXRED1, NDUFB7, NDUFV1, COX4I1, NDUFS6, C11orf83, NDUFB8, NDUFS2, NDUFS3, NDUFB5, CYC1, UQCRFS1, UQCRC2, UQCRC1
GO:0030964	NADH dehydrogenase complex	3.31126	1.35303e-12	NDUFB11, NDUFS8, NDUFB10, NDUFC1, NDUFA10, NDUFV2, NDUFAB1, NDUFS1, FOXRED1, NDUFV1, NDUFA9, NDUFB7, NDUFS6, NDUFB8, NDUFA8, NDUFS2, NDUFS3, NDUFB5, NDUFS7, NDUFA11
GO:0045271	respiratory chain complex I	3.31126	1.35303e-12	NDUFB11, NDUFS8, NDUFB10, NDUFC1, NDUFA10, NDUFV2, NDUFAB1, NDUFS1, FOXRED1, NDUFV1, NDUFA9, NDUFB7, NDUFS6, NDUFB8, NDUFA8, NDUFS2, NDUFS3, NDUFB5, NDUFS7, NDUFA11
GO:0005747	mitochondrial respiratory chain complex I	3.31126	1.35303e-12	NDUFB11, NDUFS8, NDUFB10, NDUFC1, NDUFA10, NDUFV2, NDUFAB1, NDUFS1, FOXRED1, NDUFV1, NDUFA9, NDUFB7, NDUFS6, NDUFB8, NDUFA8, NDUFS2, NDUFS3, NDUFB5, NDUFS7, NDUFA11
GO:0043209	myelin sheath	4.63576	2.69203e-07	SLC25A3, DLST, CA2, NDUFA10, PDHA1, VDAC1, VDAC2, CKB, ATP5F1, COX5A, ATP5B, NDUFV2, PHB, NDUFS1, GOT2, DLD, MDH1, DLAT, IMMT, SLC25A12, NDUFS3, ATP5A1, SLC25A4, SUCLA2, PRDX3, UQCRFS1, UQCRC2, UQCRC1
GO:0031304	intrinsic component of mitochondrial inner membrane	1.98675	6.15477e-07	CHCHD3, ETFDH, APOO, C19orf70, C11orf83, MINOS1, MCUR1, APOOL, TIMM17A, IMMT, COQ2, L2HGDH
GO:0031305	integral component of mitochondrial inner membrane	1.98675	6.15477e-07	CHCHD3, ETFDH, APOO, C19orf70, C11orf83, MINOS1, MCUR1, APOOL, TIMM17A, IMMT, COQ2, L2HGDH
GO:0000313	organellar ribosome	3.31126	6.16675e-07	MRPL19, MRP63, MRPS12, MRPS22, MRPS17, ICT1, MTG1, MTERFD2, MRPS7, MRPS35, MRPL41, MRPS18A, MRPS5, MRPL22, MRPS18B, MRPS9, MRPL16, MRPL35, MRPS24, MRPS15
GO:0005761	mitochondrial ribosome	3.31126	6.16675e-07	MRPL19, MRP63, MRPS12, MRPS22, MRPS17, ICT1, MTG1, MTERFD2, MRPS7, MRPS35, MRPL41, MRPS18A, MRPS5, MRPL22, MRPS18B, MRPS9, MRPL16, MRPL35, MRPS24, MRPS15
GO:0005763	mitochondrial small ribosomal subunit	1.82119	7.09291e-06	MRPS18A, MRPS5, MRPS18B, MRPS12, MRPS9, MRPS22, MRPS17, MRPS24, MRPS15, MRPS7, MRPS35
GO:0000314	organellar small ribosomal subunit	1.82119	7.09291e-06	MRPS18A, MRPS5, MRPS18B, MRPS12, MRPS9, MRPS22, MRPS17, MRPS24, MRPS15, MRPS7, MRPS35
GO:0032592	integral component of mitochondrial membrane	2.48344	7.3272e-06	ETFDH, MFF, C11orf83, MCUR1, MINOS1, APOOL, BNIP3, IMMT, COQ2, OXA1L, CHCHD3, APOO, C19orf70, TIMM17A, L2HGDH
GO:0098573	intrinsic component of mitochondrial membrane	2.48344	8.71152e-06	ETFDH, MFF, C11orf83, MCUR1, MINOS1, APOOL, BNIP3, IMMT, COQ2, OXA1L, CHCHD3, APOO, C19orf70, TIMM17A, L2HGDH
GO:0061617	MICOS complex	0.993377	5.72929e-05	CHCHD3, APOO, C19orf70, MINOS1, APOOL, IMMT
GO:0070069	cytochrome complex	1.65563	7.10012e-05	COX8A, PMPCB, COX5A, CYC1, UQCR10, C11orf83, COX4I1, UQCRFS1, UQCRC2, UQCRC1
GO:0045275	respiratory chain complex III	1.15894	0.000342584	PMPCB, CYC1, UQCR10, C11orf83, UQCRFS1, UQCRC2, UQCRC1
GO:0005750	mitochondrial respiratory chain complex III	1.15894	0.000342584	PMPCB, CYC1, UQCR10, C11orf83, UQCRFS1, UQCRC2, UQCRC1
GO:0031970	organelle envelope lumen	2.31788	0.00302275	TIMM13, COX19, CYCS, CHCHD7, SIRT5, CACYBP, MICU2, NDUFS1, STOML2, NDUFB7, NDUFA8, AIFM1, CHCHD2, CHCHD10
GO:0045239	tricarboxylic acid cycle enzyme complex	0.993377	0.00312521	BCKDHB, FH, DLST, DBT, SUCLG2, DLD
GO:0005758	mitochondrial intermembrane space	2.15232	0.00503106	TIMM13, COX19, CYCS, CHCHD7, SIRT5, MICU2, NDUFS1, STOML2, NDUFB7, NDUFA8, AIFM1, CHCHD2, CHCHD10
GO:0045254	pyruvate dehydrogenase complex	0.827815	0.008802	PDHB, DLD, PDHA1, DLAT, PDHX
GO:0005753	mitochondrial proton-transporting ATP synthase complex	1.15894	0.0145444	PPIF, ATP5B, ATP5O, ATP5G3, ATP5G1, ATP5A1, ATP5F1
GO:0005777	peroxisome	2.64901	0.0149241	PEX3, PEX7, DNM1L, MFF, SCP2, IDI2, ACADM, FNDC5, GSTK1, MARC2, ACOT8, PHYH, PRDX5, ECI2, DHRS4, PXMP2
GO:0042579	microbody	2.64901	0.0149241	PEX3, PEX7, DNM1L, MFF, SCP2, IDI2, ACADM, FNDC5, GSTK1, MARC2, ACOT8, PHYH, PRDX5, ECI2, DHRS4, PXMP2
GO:0015935	small ribosomal subunit	1.98675	0.0153259	MRPS18A, MRPS5, MRPS18B, MRPS12, MRPS9, MRPS22, EIF2D, MRPS17, MRPS24, MRPS15, MRPS7, MRPS35
GO:0045259	proton-transporting ATP synthase complex	1.15894	0.0171187	PPIF, ATP5B, ATP5O, ATP5G3, ATP5G1, ATP5A1, ATP5F1
GO:0031301	integral component of organelle membrane	2.81457	0.0187442	PEX3, ETFDH, MFF, C11orf83, MCUR1, MINOS1, APOOL, BNIP3, IMMT, COQ2, OXA1L, CHCHD3, APOO, C19orf70, TIMM17A, PXMP2, L2HGDH
GO:0031300	intrinsic component of organelle membrane	2.81457	0.0273576	PEX3, ETFDH, MFF, C11orf83, MCUR1, MINOS1, APOOL, BNIP3, IMMT, COQ2, OXA1L, CHCHD3, APOO, C19orf70, TIMM17A, PXMP2, L2HGDH
GO:0005840	ribosome	3.97351	0.0465818	MRPL19, MRP63, MRPS12, MRPL44, EIF2D, MRPS22, MRPS17, RPS6KC1, ICT1, MRPS7, MTERFD2, MTG1, MRPS35, MRPL41, MRPS18A, MRPS5, MRPL22, MRPS18B, MRPS9, MRPL16, MRPL35, MRPS24, MRPS15, RPS19BP1
Gene Ontology:- Molecular Function
GO:0016655	oxidoreductase activity, acting on NAD(P)H, quinone or similar compound as acceptor	3.1457	1.02508e-09	NDUFS8, NDUFB10, NDUFC1, NDUFA10, NDUFV2, NDUFAB1, NDUFS1, NDUFV1, NDUFA9, NDUFB7, NDUFS6, NDUFB8, NDUFA8, NDUFS2, NDUFS3, NDUFB5, NDUFS7, DHRS4, CBR4
GO:0048037	cofactor binding	6.29139	1.13129e-09	ETFDH, ME3, GALE, NDUFAB1, SCP2, NDUFA9, COQ6, ACADM, GLUD1, ACAD9, ACAT1, NDUFS7, OXNAD1, SIRT5, SHMT1, DECR1, LDHD, GCAT, SDHB, PHYH, MTO1, CBR4, ETFA, PROSC, ME2, DLD, GOT2, MDH1, NDUFV1, MMACHC, NDUFS2, HIBADH, GOT1, MARC2, SUCLG1, ECI2, COQ10A, AIFM1
GO:0050136	NADH dehydrogenase (quinone) activity	2.81457	1.26687e-09	NDUFS8, NDUFB10, NDUFC1, NDUFA10, NDUFV2, NDUFAB1, NDUFS1, NDUFA9, NDUFB7, NDUFV1, NDUFS6, NDUFB8, NDUFA8, NDUFS2, NDUFS3, NDUFB5, NDUFS7
GO:0003954	NADH dehydrogenase activity	2.81457	1.26687e-09	NDUFS8, NDUFB10, NDUFC1, NDUFA10, NDUFV2, NDUFAB1, NDUFS1, NDUFA9, NDUFB7, NDUFV1, NDUFS6, NDUFB8, NDUFA8, NDUFS2, NDUFS3, NDUFB5, NDUFS7
GO:0008137	NADH dehydrogenase (ubiquinone) activity	2.81457	1.26687e-09	NDUFS8, NDUFB10, NDUFC1, NDUFA10, NDUFV2, NDUFAB1, NDUFS1, NDUFA9, NDUFB7, NDUFV1, NDUFS6, NDUFB8, NDUFA8, NDUFS2, NDUFS3, NDUFB5, NDUFS7
GO:0016651	oxidoreductase activity, acting on NAD(P)H	3.80795	1.30116e-09	NDUFS8, NDUFB10, NDUFC1, NDUFA10, NDUFV2, NDUFAB1, NDUFS1, DLD, NDUFV1, NDUFA9, NDUFB7, NDUFS6, NDUFB8, NDUFA8, NDUFS2, NDUFS3, NDUFB5, NDUFS7, DECR1, PRDX3, DHRS4, CBR4, AIFM1
GO:0009055	electron carrier activity	3.80795	2.0649e-08	COX8A, GLRX5, COX5A, ME2, ETFDH, NDUFV2, NDUFS1, COX4I1, NDUFS6, ACADM, NDUFS2, SURF1, NDUFS3, ACAD9, FDX1, CYCS, CYC1, ETFB, SDHB, SDHC, COX11, AIFM1, ETFA
GO:0051540	metal cluster binding	2.98013	8.22114e-08	GLRX5, NDUFS8, ETFDH, NDUFV2, NUBP1, NDUFS1, NDUFV1, NDUFS2, FDX1, CISD3, NDUFS7, ISCU, SIVA1, SDHB, ISCA1, UQCRFS1, LIAS, ISCA2
GO:0051536	iron-sulfur cluster binding	2.98013	8.22114e-08	GLRX5, NDUFS8, ETFDH, NDUFV2, NUBP1, NDUFS1, NDUFV1, NDUFS2, FDX1, CISD3, NDUFS7, ISCU, SIVA1, SDHB, ISCA1, UQCRFS1, LIAS, ISCA2
GO:0050662	coenzyme binding	4.4702	1.19535e-06	ME3, ETFDH, GALE, SCP2, NDUFA9, COQ6, ACADM, GLUD1, ACAD9, ACAT1, OXNAD1, SIRT5, LDHD, DECR1, MTO1, CBR4, ETFA, ME2, DLD, MDH1, NDUFV1, MMACHC, HIBADH, NDUFS2, MARC2, ECI2, AIFM1
GO:0051537	2 iron, 2 sulfur cluster binding	1.82119	1.32648e-06	GLRX5, CISD3, ISCU, SIVA1, SDHB, NDUFS1, NDUFV2, ISCA1, UQCRFS1, FDX1, ISCA2
GO:0051539	4 iron, 4 sulfur cluster binding	1.98675	6.90224e-05	NDUFS7, ISCU, NDUFS8, ETFDH, SDHB, NDUFS1, NUBP1, NDUFV1, ISCA1, NDUFS2, LIAS, ISCA2
GO:0015078	hydrogen ion transmembrane transporter activity	2.48344	0.00136475	COX8A, COX5A, ATP5B, UQCR10, COX4I1, SURF1, ATP5A1, ATP5O, COX11, ATP6V1E1, ATP5G3, ATP5G1, UQCRFS1, ATP5F1, UQCRC1
GO:0016830	carbon-carbon lyase activity	1.65563	0.00360329	DDT, ECHDC1, BCKDHB, FAHD1, ME2, SHMT1, ME3, UROD, GOT1, ACAT1
GO:0016831	carboxy-lyase activity	1.3245	0.00920347	DDT, ECHDC1, BCKDHB, FAHD1, ME2, ME3, UROD, GOT1
GO:0003735	structural constituent of ribosome	3.80795	0.00929521	MRPL19, SLC25A30, SLC25A11, MRP63, MRPS12, SLC25A3, MRPS22, MRPS17, MRPS7, SLC25A12, MRPS35, SLC25A4, MRPL41, MRPS18A, MRPS5, MRPL22, MRPS18B, MRPS9, MRPL16, MRPL35, MRPS24, MRPS15, SLC25A19
GO:0004738	pyruvate dehydrogenase activity	0.827815	0.0203502	PDHB, DLD, PDHA1, DLAT, PDHX
GO:0034603	pyruvate dehydrogenase [NAD(P)+] activity	0.827815	0.0203502	PDHB, DLD, PDHA1, DLAT, PDHX
GO:0034604	pyruvate dehydrogenase (NAD+) activity	0.827815	0.0203502	PDHB, DLD, PDHA1, DLAT, PDHX
GO:0048038	quinone binding	0.993377	0.0207122	NDUFS7, ETFDH, SDHB, COQ10A, CBR4, NDUFS2
GO:0046933	proton-transporting ATP synthase activity, rotational mechanism	0.993377	0.0388158	ATP5B, ATP5O, ATP5G3, ATP5G1, ATP5A1, ATP5F1
GO:0050660	flavin adenine dinucleotide binding	1.82119	0.0424274	OXNAD1, ETFDH, LDHD, DLD, MTO1, COQ6, MMACHC, ACADM, ETFA, AIFM1, ACAD9

## Sheet: M10
Term ID	Term description	Genes in term (%)	P-value (BH-corrected)	Module genes in term
Gene Ontology:- Biological Process
GO:0050878	regulation of body fluid levels	6.20915	0.00108577	ZAP70, ADCY7, ITPR1, ADCY5, ITPR2, CD9, DOCK8, RAP2B, MYL9, ZNF385A, CD34, PDGFD, C1QTNF1, ADCY3, GNG2, PLAT, FAM46A, F3, NR1H3, NPR1, F10, CCND1, STXBP1, TC2N, HPS5, HEG1, VPS33B, PROS1, ENTPD1, BLOC1S3, PAPSS2, DOCK1, APOE, ARRB1, GNB1, VAV2, STK39, FYN
GO:0050817	coagulation	5.06536	0.00120083	ZAP70, ITPR1, ITPR2, PSEN1, CD9, DOCK8, RAP2B, MYL9, CD34, PDGFD, C1QTNF1, GNG2, PLAT, FAM46A, F3, F10, STXBP1, TC2N, HPS5, VPS33B, PROS1, ENTPD1, BLOC1S3, PAPSS2, ANXA4, DOCK1, APOE, ARRB1, GNB1, VAV2, FYN
GO:0000902	cell morphogenesis	12.0915	0.00174604	ENPP2, DZIP1, CORO1B, KIAA1009, TCTN3, WIPF1, POFUT2, FZD4, TMEM100, TCTN1, OGN, RAB8A, BBS1, HEG1, CSNK1G1, ID2, SYNGAP1, DYNC2H1, DBNL, DOCK1, RASA1, APOE, IFT52, SHROOM1, NRP2, FMOD, ALMS1, MYO7A, UNC13D, PTPRA, TTC8, TCF7L2, CSNK1G3, IFT122, BBS7, EGFR, PSEN1, SH3KBP1, ZNF385A, CCDC176, CENPJ, ECM2, RBPJ, NET1, STK4, CEP120, TMEM216, DOCK7, NFIB, MAP1B, WIPF2, NSMF, TBC1D2, CNTNAP1, STXBP1, B…
GO:0032989	cellular component morphogenesis	12.7451	0.00179624	ENPP2, DZIP1, CORO1B, KIAA1009, TCTN3, WIPF1, POFUT2, FZD4, TMEM100, TCTN1, PID1, OGN, RAB8A, BBS1, HEG1, CSNK1G1, ID2, SYNGAP1, DYNC2H1, DBNL, DOCK1, RASA1, APOE, IFT52, SHROOM1, NRP2, FMOD, ALMS1, MYO7A, UNC13D, PTPRA, TTC8, TCF7L2, CSNK1G3, IFT122, BBS7, EGFR, PSEN1, CD9, SH3KBP1, ZNF385A, CCDC176, CENPJ, ECM2, RBPJ, NET1, STK4, CEP120, TMEM216, DOCK7, NFIB, MAP1B, WIPF2, NSMF, TBC1D2, CNTNAP1…
GO:0007599	hemostasis	4.90196	0.00186393	ZAP70, ITPR1, ITPR2, CD9, DOCK8, RAP2B, MYL9, ZNF385A, CD34, PDGFD, C1QTNF1, GNG2, PLAT, FAM46A, F3, F10, STXBP1, TC2N, HPS5, VPS33B, PROS1, ENTPD1, BLOC1S3, PAPSS2, DOCK1, APOE, ARRB1, VAV2, GNB1, FYN
GO:0007166	cell surface receptor signaling pathway	20.2614	0.00220653	ZAP70, CDH6, CDON, DZIP1, TNFSF12, IGF1, FMR1, GPR124, CALCRL, SLC17A7, VANGL1, TGIF2, FOXC1, FZD4, SPIN1, APCDD1, IGFBP3, PID1, ATP6AP2, F3, DDR2, GPER1, ITGBL1, BRCA1, CSNK1G1, HIP1, MDK, TULP3, LPHN2, DOCK1, APOE, RAB7L1, DKK3, IFT52, DLL1, VAV2, FMOD, TIMP4, DAPK1, CSNK1G3, ATOH8, NGFRAP1, BBS7, TSPAN6, CD9, TNFRSF14, PDCD6, RBPJ, VEGFC, GNG2, CCND1, BOC, LEPROT, TCIRG1, CXCL12, GNB1, MAML3, …
GO:0048660	regulation of smooth muscle cell proliferation	2.77778	0.00395591	EGFR, BMP4, ID2, IGF1, PPARG, CALCRL, PDGFD, FGF2, IGFBP3, KLF4, OGN, RBPMS2, PDE1A, IRAK4, GPER1, NPR1, TCF7L2
GO:0006928	movement of cell or subcellular component	14.8693	0.00423319	KCTD13, ENPP2, ZAP70, TRIP6, ABI3, CORO1B, LHX6, TNFSF12, IGF1, GPR124, RAP2B, WIPF1, CD34, PDGFD, FOXC1, MMP28, PRKD2, MLPH, APCDD1, FGF2, KIFC2, IGFBP3, PLAT, SWAP70, OGN, F3, IRAK4, GPER1, DDR2, F10, PTPRK, CXCL14, BLOC1S3, MDK, DYNC2H1, DOCK1, APOE, LTB4R, VAV2, NRP2, FMOD, KLF4, MYO7A, CCDC88A, MEOX2, PTPRA, TTC8, ATOH8, IFT122, IKBKAP, EGFR, IL16, PSEN1, CD9, DOCK8, TNFRSF14, SH3KBP1, LAMA3…
GO:0040011	locomotion	12.9085	0.00433434	KCTD13, ENPP2, ZAP70, TRIP6, ABI3, CORO1B, LHX6, TNFSF12, IGF1, GPR124, RAP2B, CD34, PDGFD, FOXC1, MMP28, PRKD2, FZD4, APCDD1, FGF2, IGFBP3, PLAT, SWAP70, OGN, F3, IRAK4, GPER1, DDR2, F10, PTPRK, CXCL14, ID2, MDK, DOCK1, APOE, VAV2, NRP2, FMOD, KLF4, CCDC88A, MEOX2, PTPRA, TTC8, ATOH8, IKBKAP, EGFR, IL16, PSEN1, DOCK8, TNFRSF14, SH3KBP1, LAMA3, PDCD6, NET1, MYLK, ADCY3, VEGFC, LYST, DOCK7, NFIB, …
GO:0050818	regulation of coagulation	2.12418	0.00441201	ZAP70, TC2N, VPS33B, PROS1, PSEN1, ANXA4, CD34, APOE, C1QTNF1, VAV2, FAM46A, PLAT, F3
GO:0050673	epithelial cell proliferation	4.73856	0.00694447	ATOH8, IFT122, EGFR, COL8A1, PSEN1, TNFSF12, IGF1, CD34, PDCD6, PRKD2, FGF2, VEGFC, IGFBP3, NFIB, F3, CCND1, PTPRK, PTEN, ID2, BMP4, ITGB1BP1, MST1, APOE, DLG1, CXCL12, IFT52, NRP2, ALMS1, OSR2
GO:0001568	blood vessel development	7.02614	0.00715728	PKD2, PLCD1, COL8A1, HSPG2, TNFSF12, PSEN1, TSPAN12, GPR124, CALCRL, CD34, PDGFD, FOXC1, PDCD6, FZD4, PRKD2, RBPJ, TMEM100, STK4, MYLK, FGF2, VEGFC, LTBP1, F3, GPER1, NPR1, PTEN, BRCA1, HEG1, BMP4, ITGB1BP1, DYNC2H1, RASA1, APOE, PLXDC1, DLL1, VAV2, NRP2, KLF4, MYH10, MEOX2, PCSK5, RECK, TCF7L2
GO:0007596	blood coagulation	4.41176	0.00742382	ZAP70, ITPR1, ITPR2, CD9, DOCK8, RAP2B, MYL9, CD34, PDGFD, C1QTNF1, GNG2, PLAT, F3, F10, STXBP1, HPS5, VPS33B, PROS1, ENTPD1, BLOC1S3, PAPSS2, DOCK1, APOE, ARRB1, VAV2, GNB1, FYN
GO:0007268	chemical synaptic transmission	5.06536	0.00751171	NOVA1, DLG3, CACNB3, PLCB3, EGFR, PSEN1, SYTL4, FMR1, NAAA, PPT1, PCDHB4, SLC17A7, GLRB, PTPRS, PTPRN2, NSMF, GPER1, STXBP1, RAB8A, TC2N, PTEN, SNCG, FCHSD2, PCDHB16, SYNGAP1, APOE, DLG1, BAIAP2, TMOD2, SLC18A2, SYNJ1
GO:0099536	synaptic signaling	5.06536	0.00751171	NOVA1, DLG3, CACNB3, PLCB3, EGFR, PSEN1, SYTL4, FMR1, NAAA, PPT1, PCDHB4, SLC17A7, GLRB, PTPRS, PTPRN2, NSMF, GPER1, STXBP1, RAB8A, TC2N, PTEN, SNCG, FCHSD2, PCDHB16, SYNGAP1, APOE, DLG1, BAIAP2, TMOD2, SLC18A2, SYNJ1
GO:0099537	trans-synaptic signaling	5.06536	0.00751171	NOVA1, DLG3, CACNB3, PLCB3, EGFR, PSEN1, SYTL4, FMR1, NAAA, PPT1, PCDHB4, SLC17A7, GLRB, PTPRS, PTPRN2, NSMF, GPER1, STXBP1, RAB8A, TC2N, PTEN, SNCG, FCHSD2, PCDHB16, SYNGAP1, APOE, DLG1, BAIAP2, TMOD2, SLC18A2, SYNJ1
GO:0098916	anterograde trans-synaptic signaling	5.06536	0.00751171	NOVA1, DLG3, CACNB3, PLCB3, EGFR, PSEN1, SYTL4, FMR1, NAAA, PPT1, PCDHB4, SLC17A7, GLRB, PTPRS, PTPRN2, NSMF, GPER1, STXBP1, RAB8A, TC2N, PTEN, SNCG, FCHSD2, PCDHB16, SYNGAP1, APOE, DLG1, BAIAP2, TMOD2, SLC18A2, SYNJ1
GO:0003008	system process	11.7647	0.00774563	CACNB3, ADCY7, PLCB3, ADCY5, IGF1, PPT1, CALCRL, MYL9, ATP2A3, SLC17A7, CD34, GLRB, FOXC1, C1QTNF1, FZD4, TMEM100, ATP6AP2, NR1H3, GPER1, BBS1, PTGS1, HEG1, ID2, MDK, SYNGAP1, LTB4R, APOE, TMEM133, DLL1, KCNAB1, ALMS1, KLF4, MYO7A, MEOX2, SYNJ1, CBR3, PCSK5, TTC8, SORBS3, BBS7, ITPR1, EGFR, ITPR2, PSEN1, ZNF385A, SCNN1D, MYLK, TUB, ADCY3, VEGFC, KLHL3, NPR1, CNTNAP1, PTEN, NIPSNAP1, BMP4, PPARG, …
GO:0042060	wound healing	6.04575	0.00797279	ZAP70, CORO1B, ITPR1, EGFR, ITPR2, CPQ, CD9, DOCK8, IGF1, RAP2B, MYL9, CD34, PDGFD, C1QTNF1, MYLK, FGF2, GNG2, PLAT, FAM46A, F3, F10, STXBP1, TC2N, HPS5, VPS33B, PROS1, ENTPD1, BLOC1S3, PAPSS2, DOCK1, APOE, DCBLD2, ARRB1, GNB1, VAV2, FYN, MYH10
GO:0007423	sensory organ development	5.55556	0.00808866	CDON, IFT122, BBS7, EGFR, RARG, COL8A1, PSEN1, TSPAN12, SLC17A7, TGIF2, FOXC1, FZD4, RBPJ, TUB, LRIG3, NTN1, SALL2, CXCL14, BMP4, BLOC1S3, GLI2, TULP3, DLG1, DLL1, GNB1, BNC2, ALMS1, OSR2, KLF4, MYH10, MYO7A, MPV17, NAGLU, TTC8
GO:0001654	eye development	4.41176	0.00813158	CDON, IFT122, BBS7, EGFR, COL8A1, RARG, PSEN1, TSPAN12, SLC17A7, TGIF2, FOXC1, FZD4, TUB, SALL2, BMP4, BLOC1S3, TULP3, DLG1, DLL1, GNB1, OSR2, ALMS1, MYH10, MYO7A, KLF4, NAGLU, TTC8
GO:0007267	cell-cell signaling	11.1111	0.00813397	NOVA1, CACNB3, PLCB3, ADCY5, RARG, SYTL4, NAAA, FMR1, PPT1, SLC17A7, CD34, GLRB, VANGL1, C1QTNF1, FZD4, SPIN1, APCDD1, FGF2, ATP6AP2, GPER1, RAB8A, CSNK1G1, CXCL14, FCHSD2, SYNGAP1, APOE, DKK3, ARRB1, MARCKS, DLL1, KLF4, SYNJ1, MPZL1, PCSK5, TCF7L2, CSNK1G3, DLG3, CPT1A, ITPR1, EGFR, ITPR2, PSEN1, PSMD5, PCDHB4, SH3KBP1, PTPRS, RBPJ, STK4, GNG2, PTPRN2, SLC8B1, HFE, NSMF, CCND1, STXBP1, PTEN, TC2…
GO:0060322	head development	7.35294	0.00907702	CDON, BBS7, EGFR, APAF1, RARG, LHX6, CD9, PSEN1, GNB4, PPT1, SLC17A7, FOXC1, FZD4, RBPJ, FGF2, HNMT, CEP120, TCTN1, ATP6AP2, NFIB, DOCK7, CDK5RAP3, DCLK2, PTEN, PCDH19, BMP4, ID2, MDK, GLI2, TULP3, DYNC2H1, APP, PGAP1, CLN5, CXCL12, DLL1, NRP2, KCNAB1, OSR2, FYN, MYH10, SYNJ1, NAGLU, TTC8, SRGAP2
GO:0016477	cell migration	10.6209	0.00939049	KCTD13, ENPP2, ZAP70, TRIP6, CORO1B, LHX6, TNFSF12, IGF1, GPR124, RAP2B, CD34, PDGFD, FOXC1, MMP28, PRKD2, APCDD1, FGF2, IGFBP3, PLAT, SWAP70, F3, IRAK4, DDR2, GPER1, F10, PTPRK, CXCL14, MDK, DOCK1, APOE, VAV2, NRP2, KLF4, CCDC88A, MEOX2, ATOH8, IKBKAP, EGFR, IL16, PSEN1, DOCK8, SH3KBP1, TNFRSF14, PDCD6, NET1, MYLK, VEGFC, LYST, DOCK7, NSMF, PTEN, NTN1, BMP4, PROS1, MST1, ITGB1BP1, CXCL12, ELMO1,…
GO:0001944	vasculature development	7.18954	0.00947427	ENPP2, PKD2, PLCD1, COL8A1, HSPG2, TNFSF12, PSEN1, TSPAN12, GPR124, CALCRL, CD34, PDGFD, FOXC1, PDCD6, FZD4, PRKD2, RBPJ, TMEM100, STK4, MYLK, FGF2, VEGFC, LTBP1, F3, GPER1, NPR1, PTEN, BRCA1, HEG1, BMP4, ITGB1BP1, DYNC2H1, RASA1, APOE, PLXDC1, DLL1, VAV2, NRP2, KLF4, MYH10, MEOX2, PCSK5, RECK, TCF7L2
GO:0032101	regulation of response to external stimulus	6.53595	0.0096048	ZAP70, CORO1B, TSPAN6, EGFR, IL16, ZC3HAV1, GPR124, CALCRL, CD34, PDGFD, MMP28, C1QTNF1, PRKD2, FGF2, VEGFC, PLAT, FAM46A, SWAP70, F3, NR1H3, GPER1, AP1S1, PTEN, TC2N, NLRP1, CXCL14, VPS33B, PROS1, MST1, PUM2, PPARG, APOE, CXCL12, VAV2, ELMO1, AGTR1, CFI, STK39, KLF4, FYN
GO:0033002	muscle cell proliferation	2.94118	0.0113892	PTEN, EGFR, BMP4, ID2, IGF1, PPARG, CALCRL, PDGFD, FOXC1, RBPJ, FGF2, IGFBP3, KLF4, OGN, RBPMS2, IRAK4, GPER1, NPR1
GO:0051674	localization of cell	11.2745	0.0116349	KCTD13, ENPP2, ZAP70, TRIP6, ABI3, CORO1B, LHX6, TNFSF12, IGF1, GPR124, RAP2B, CD34, PDGFD, FOXC1, MMP28, PRKD2, APCDD1, FGF2, IGFBP3, PLAT, SWAP70, F3, IRAK4, GPER1, DDR2, F10, PTPRK, CXCL14, MDK, DOCK1, APOE, VAV2, NRP2, KLF4, CCDC88A, MEOX2, ATOH8, IKBKAP, EGFR, IL16, PSEN1, DOCK8, TNFRSF14, SH3KBP1, LAMA3, PDCD6, NET1, MYLK, ADCY3, VEGFC, LYST, DOCK7, NSMF, PTEN, NTN1, BMP4, PROS1, MST1, ITGB…
GO:0048870	cell motility	11.2745	0.0116349	KCTD13, ENPP2, ZAP70, TRIP6, ABI3, CORO1B, LHX6, TNFSF12, IGF1, GPR124, RAP2B, CD34, PDGFD, FOXC1, MMP28, PRKD2, APCDD1, FGF2, IGFBP3, PLAT, SWAP70, F3, IRAK4, GPER1, DDR2, F10, PTPRK, CXCL14, MDK, DOCK1, APOE, VAV2, NRP2, KLF4, CCDC88A, MEOX2, ATOH8, IKBKAP, EGFR, IL16, PSEN1, DOCK8, TNFRSF14, SH3KBP1, LAMA3, PDCD6, NET1, MYLK, ADCY3, VEGFC, LYST, DOCK7, NSMF, PTEN, NTN1, BMP4, PROS1, MST1, ITGB…
GO:0048659	smooth muscle cell proliferation	2.45098	0.0144164	EGFR, BMP4, ID2, IGF1, PPARG, CALCRL, PDGFD, FGF2, IGFBP3, KLF4, OGN, RBPMS2, IRAK4, GPER1, NPR1
GO:0007420	brain development	6.86275	0.0147601	CDON, BBS7, EGFR, APAF1, LHX6, PSEN1, CD9, GNB4, PPT1, SLC17A7, FOXC1, FZD4, RBPJ, FGF2, HNMT, CEP120, TCTN1, NFIB, DOCK7, CDK5RAP3, DCLK2, PTEN, PCDH19, BMP4, ID2, MDK, GLI2, TULP3, DYNC2H1, APP, PGAP1, CLN5, CXCL12, DLL1, NRP2, KCNAB1, FYN, MYH10, SYNJ1, NAGLU, SRGAP2, TTC8
GO:0048858	cell projection morphogenesis	7.51634	0.0165717	ENPP2, DZIP1, CORO1B, IFT122, BBS7, EGFR, KIAA1009, TCTN3, PSEN1, CCDC176, CENPJ, ECM2, CEP120, TCTN1, TMEM216, OGN, NFIB, DOCK7, MAP1B, CNTNAP1, STXBP1, BOC, RAB8A, PTEN, NTN1, BBS1, GLI2, DYNC2H1, SYNGAP1, DBNL, APOE, APP, IFT52, CXCL12, RILPL2, BAIAP2, NRP2, CEP135, FMOD, ALMS1, FYN, MYH10, PTPRA, IFT43, TTC8, SRGAP2
GO:0030900	forebrain development	4.24837	0.0166035	CDON, EGFR, APAF1, LHX6, PSEN1, RBPJ, FGF2, TCTN1, CEP120, NFIB, DOCK7, DCLK2, PTEN, ID2, BMP4, MDK, GLI2, DYNC2H1, APP, PGAP1, CXCL12, NRP2, FYN, MYH10, TTC8, SRGAP2
GO:0030193	regulation of blood coagulation	1.79739	0.0167601	ZAP70, TC2N, VAV2, C1QTNF1, FAM46A, PLAT, PROS1, VPS33B, F3, CD34, APOE
GO:1900046	regulation of hemostasis	1.79739	0.0167601	ZAP70, TC2N, VAV2, C1QTNF1, FAM46A, PLAT, PROS1, VPS33B, F3, CD34, APOE
GO:0007417	central nervous system development	8.16993	0.0175892	CDON, LHX6, GNB4, PPT1, GPR124, SLC17A7, FOXC1, FZD4, FGF2, TCTN1, CDK5RAP3, DCLK2, ID2, PCDH19, MDK, TULP3, DYNC2H1, PLXDC1, DLL1, NRP2, KCNAB1, TIMP4, SYNJ1, TTC8, PKD2, BBS7, IFT122, EGFR, APAF1, CD9, PSEN1, RBPJ, STK4, HNMT, CEP120, NFIB, DOCK7, PTEN, BMP4, PPARG, GLI2, APP, PGAP1, CXCL12, CLN5, MYH10, FYN, HDAC10, NAGLU, SRGAP2
GO:0032990	cell part morphogenesis	7.67974	0.0199951	ENPP2, DZIP1, CORO1B, IFT122, BBS7, EGFR, KIAA1009, TCTN3, PSEN1, CCDC176, CENPJ, ECM2, CEP120, PID1, TCTN1, TMEM216, OGN, NFIB, DOCK7, MAP1B, CNTNAP1, STXBP1, BOC, RAB8A, PTEN, NTN1, BBS1, GLI2, DYNC2H1, SYNGAP1, DBNL, APOE, APP, IFT52, CXCL12, RILPL2, BAIAP2, NRP2, CEP135, FMOD, ALMS1, FYN, MYH10, PTPRA, IFT43, TTC8, SRGAP2
GO:0009611	response to wounding	6.53595	0.020252	ZAP70, CORO1B, ITPR1, EGFR, ITPR2, CPQ, CD9, DOCK8, IGF1, RAP2B, MYL9, CD34, PDGFD, C1QTNF1, MYLK, FGF2, GNG2, PLAT, FAM46A, F3, F10, STXBP1, PTEN, TC2N, HPS5, VPS33B, PROS1, PAPSS2, ENTPD1, BLOC1S3, MDK, DOCK1, APOE, DCBLD2, ARRB1, GNB1, VAV2, KLF4, FYN, MYH10
GO:0048646	anatomical structure formation involved in morphogenesis	10.2941	0.0317493	CDON, DZIP1, PLCD1, RARG, COL8A1, KIAA1009, HSPG2, TNFSF12, TSPAN12, GPR124, CALCRL, CD34, POFUT2, FOXC1, PRKD2, TMEM100, FGF2, TCTN1, F3, RAB8A, BRCA1, BBS1, TULP3, DYNC2H1, IFT52, PLXDC1, DLL1, LFNG, VAV2, NRP2, ALMS1, KLF4, UNC13D, CAMK1, MEOX2, TTC8, ATOH8, IFT122, BBS7, APAF1, CD9, PSEN1, LAMA3, ZNF385A, CCDC176, PDCD6, CENPJ, RBPJ, STK4, VEGFC, CEP120, TMEM216, NFIB, NPR1, CNTNAP1, PTEN, BM…
GO:1903034	regulation of response to wounding	2.45098	0.0323409	ZAP70, PTEN, TC2N, VPS33B, PROS1, CD34, APOE, C1QTNF1, VAV2, MYLK, FGF2, FAM46A, PLAT, KLF4, F3
GO:0022603	regulation of anatomical structure morphogenesis	9.96732	0.0323859	ENPP2, CORO1B, TNFSF12, TSPAN12, GPR124, CD34, WIPF1, VANGL1, POFUT2, TGIF2, FOXC1, PRKD2, FZD4, TMEM100, FGF2, PID1, OGN, F3, BRCA1, CSNK1G1, SYNGAP1, DOCK1, RASA1, APOE, DLL1, LFNG, FMOD, KLF4, UNC13D, CAMK1, MEOX2, TCF7L2, CSNK1G3, PSEN1, PSMD5, SH3KBP1, ASPN, PDCD6, CENPJ, RBPJ, NET1, VEGFC, CEP120, NFIB, MAP1B, NSMF, WIPF2, TBC1D2, NPR1, PTEN, NTN1, BMP4, ITGB1BP1, DLG1, CXCL12, BAIAP2, CEP1…
GO:0046903	secretion	8.66013	0.0328806	ZAP70, ADCY5, SYTL4, FMR1, IGF1, NAAA, PPT1, SLC17A7, CD34, C1QTNF1, FZD4, TMX3, NR1H3, GPER1, RAB8A, RAB33B, ANXA4, ARRB1, MARCKS, UNC13D, SYNJ1, PCSK5, TCF7L2, IRF3, CPT1A, ITPR1, EGFR, ITPR2, CD9, PSEN1, TNFRSF14, PDCD6IP, RBPJ, VEGFC, PTPRN2, SLC8B1, HFE, NPR1, CCND1, STXBP1, FBLN5, TC2N, NLRP1, SNCG, VPS33B, PROS1, APP, CXCL12, CFD, AGTR1, STK39, MYH10, SLC18A2
GO:0042330	taxis	4.90196	0.0335243	ENPP2, CORO1B, IL16, PDGFD, MMP28, PRKD2, FGF2, LYST, VEGFC, SWAP70, OGN, NFIB, F3, BOC, NTN1, CXCL14, ID2, BMP4, MST1, GLI2, APP, CXCL12, NRP2, AGTR1, FMOD, PLEKHG5, MYH10, FYN, PTPRA, TTC8
GO:0007399	nervous system development	15.8497	0.0336002	CDON, LHX6, GNB4, FMR1, PPT1, GPR124, SLC17A7, GLRB, FOXC1, TGIF2, FZD4, APCDD1, FBXO7, ATP6AP2, TCTN1, GPER1, RAB8A, DCLK2, SALL2, ITM2B, BLOC1S3, MDK, TULP3, APOE, RAB7L1, IFT52, DLL1, KCNAB1, FMOD, DGUOK, CAMK1, TIMP4, SYNJ1, ATOH8, BBS7, APAF1, CD9, SERINC5, ECM2, RBPJ, VEGFC, DOCK7, NFIB, STXBP1, BOC, NTN1, PGAP1, CXCL12, MYH10, TMOD2, EFHD1, HDAC10, SRGAP2, RARG, ZNF521, FGF2, GFRA1, OGN, C…
GO:0040017	positive regulation of locomotion	4.73856	0.0338437	ENPP2, TRIP6, ATOH8, IKBKAP, EGFR, IL16, IGF1, GPR124, TNFRSF14, PDGFD, PDCD6, PRKD2, MYLK, FGF2, VEGFC, SWAP70, DOCK7, F3, NSMF, GPER1, DDR2, F10, NTN1, CXCL14, BMP4, ITGB1BP1, DOCK1, CXCL12, NRP2
GO:0009605	response to external stimulus	13.8889	0.0345481	ENPP2, ZAP70, CASP8, CORO1B, ZC3HAV1, FMR1, GPR124, CALCRL, WIPF1, CD34, GLRB, PDGFD, MMP28, PRKD2, C1QTNF1, OGG1, FGF2, FAM46A, CCDC88B, PLAT, C19orf66, SWAP70, OGN, F3, NR1H3, GPER1, MRC1, CXCL14, ID2, BLOC1S3, PUM2, APOE, RAB7L1, ARRB1, VAV2, NRP2, FMOD, KLF4, UNC13D, TIMP4, PTPRA, TTC8, MR1, PKD2, IRF3, EGFR, TSPAN6, APAF1, IL16, TNFRSF14, BNIP3L, SERINC5, RBPJ, VEGFC, LYST, GAS2L1, HFE, NFIB…
GO:0030168	platelet activation	2.61438	0.036116	STXBP1, ZAP70, ITPR1, ITPR2, CD9, VPS33B, BLOC1S3, RAP2B, MYL9, APOE, ARRB1, C1QTNF1, VAV2, GNB1, GNG2, FYN
GO:1901342	regulation of vasculature development	3.43137	0.0365914	ENPP2, BRCA1, BMP4, TNFSF12, TSPAN12, GPR124, ITGB1BP1, CD34, PDGFD, FOXC1, PDCD6, DLL1, PRKD2, TMEM100, FGF2, VEGFC, KLF4, MEOX2, F3, GPER1, NPR1
GO:0032940	secretion by cell	7.84314	0.042065	ZAP70, IRF3, CPT1A, ITPR1, EGFR, ADCY5, ITPR2, CD9, SYTL4, PSEN1, NAAA, FMR1, IGF1, PPT1, TNFRSF14, SLC17A7, CD34, PDCD6IP, FZD4, C1QTNF1, RBPJ, TMX3, VEGFC, PTPRN2, SLC8B1, HFE, NR1H3, GPER1, STXBP1, RAB8A, TC2N, NLRP1, SNCG, RAB33B, VPS33B, PROS1, ANXA4, APP, ARRB1, CXCL12, MARCKS, CFD, SLC18A2, MYH10, UNC13D, SYNJ1, PCSK5, TCF7L2
GO:0072358	cardiovascular system development	9.31373	0.0429746	ENPP2, PLCD1, COL8A1, HSPG2, TNFSF12, TSPAN12, IGF1, GPR124, CALCRL, CD34, PDGFD, FOXC1, PRKD2, FZD4, TMEM100, FGF2, F3, MAML1, GPER1, BRCA1, HEG1, ID2, DYNC2H1, RASA1, APOE, IFT52, PLXDC1, ADAM19, DLL1, VAV2, NRP2, KCNAB1, KLF4, MEOX2, PCSK5, TCF7L2, PKD2, IFT122, BBS7, EGFR, PSEN1, PDCD6, RBPJ, MYLK, STK4, VEGFC, LTBP1, NPR1, PTEN, CPE, BMP4, PPARG, GLI2, ITGB1BP1, MYH11, MYH10, RECK
GO:0072359	circulatory system development	9.31373	0.0429746	ENPP2, PLCD1, COL8A1, HSPG2, TNFSF12, TSPAN12, IGF1, GPR124, CALCRL, CD34, PDGFD, FOXC1, PRKD2, FZD4, TMEM100, FGF2, F3, MAML1, GPER1, BRCA1, HEG1, ID2, DYNC2H1, RASA1, APOE, IFT52, PLXDC1, ADAM19, DLL1, VAV2, NRP2, KCNAB1, KLF4, MEOX2, PCSK5, TCF7L2, PKD2, IFT122, BBS7, EGFR, PSEN1, PDCD6, RBPJ, MYLK, STK4, VEGFC, LTBP1, NPR1, PTEN, CPE, BMP4, PPARG, GLI2, ITGB1BP1, MYH11, MYH10, RECK
GO:0007224	smoothened signaling pathway	2.12418	0.0438731	CDON, BOC, DZIP1, BBS7, IFT122, EVC, BMP4, TCTN3, GLI2, TULP3, DYNC2H1, IFT52, CENPJ
GO:0006897	endocytosis	6.20915	0.045666	ENPP2, CSNK1G3, EGFR, RAB34, CD9, FMR1, PPT1, CALCRL, LDLRAD3, SH3KBP1, WIPF1, TUB, HFE, NR1H3, WIPF2, AP1S1, MRC1, PTEN, CSNK1G1, SNX33, HIP1, PPARG, DBNL, DOCK1, APOE, APP, ARRB1, DLL1, ARPC1A, VAV2, BAIAP2, ELMO1, PLD2, CFI, FYN, MYO7A, UNC13D, SYNJ1
GO:2000147	positive regulation of cell motility	4.57516	0.0488253	ENPP2, TRIP6, ATOH8, IKBKAP, EGFR, IGF1, GPR124, TNFRSF14, PDGFD, PDCD6, PRKD2, MYLK, FGF2, VEGFC, SWAP70, DOCK7, F3, NSMF, GPER1, DDR2, F10, NTN1, CXCL14, BMP4, ITGB1BP1, DOCK1, CXCL12, NRP2
Gene Ontology:- Cellular Component
GO:0005929	cilium	6.20915	0.000114828	PKD2, DZIP1, IFT122, BBS7, ADCY5, KIAA1009, PSEN1, TCTN3, CCDC176, CENPJ, CROCC, TUB, ADCY3, TCTN1, TMEM216, ELMOD3, MAP1B, RAB8A, PTPRK, BBS1, PTGS1, EVC, LCA5, GNB5, CROCCP3, GLI2, TULP3, DYNC2H1, APP, IFT52, RILPL2, GNB1, ALMS1, MYO7A, INPP5E, IFT43, RP2, TTC8
GO:0072372	primary cilium	3.75817	0.000320351	PKD2, RAB8A, PTPRK, IFT122, BBS7, ADCY5, PTGS1, GNB5, GLI2, TULP3, DYNC2H1, IFT52, RILPL2, GNB1, TCTN1, MYO7A, TMEM216, ELMOD3, IFT43, INPP5E, MAP1B, RP2, TTC8
GO:0097458	neuron part	11.9281	0.000325014	CASP8, PTPN13, PIAS3, SYTL4, NAAA, FMR1, PPT1, SLC17A7, GLRB, CROCC, MLPH, TMEM100, FBXO7, ELMOD3, PDE1A, GPER1, RAB8A, PTPRK, PTGS1, BLOC1S3, HIP1, SYNGAP1, DBNL, MAP3K12, GOPC, APOE, PLXDC1, IFT52, ARRB1, NRP2, KCNAB1, MYO7A, ADD3, SYNJ1, DMXL2, DLG3, BBS7, ITPR1, STX6, PSEN1, MAGOHB, SH3KBP1, ZNF385A, SEPT6, HNMT, PTPRN2, NFIB, DOCK7, AP3S1, MAP1B, NSMF, AP1S1, CNTNAP1, STXBP1, BOC, PTEN, NLRP…
GO:0044441	ciliary part	4.57516	0.000637961	PKD2, DZIP1, IFT122, BBS7, KIAA1009, PSEN1, TCTN3, CCDC176, CENPJ, CROCC, TCTN1, TMEM216, RAB8A, BBS1, EVC, CROCCP3, GLI2, TULP3, DYNC2H1, APP, IFT52, RILPL2, GNB1, ALMS1, INPP5E, IFT43, RP2, TTC8
GO:0044456	synapse part	6.20915	0.00106363	DLG3, ITPR1, STX6, PSEN1, SYTL4, NAAA, FMR1, PPT1, SLC17A7, GLRB, SEPT6, PTPRN2, MAP1B, NSMF, GPER1, AP1S1, STXBP1, RAB8A, PTEN, NIPSNAP1, CPE, HIP1, RUSC1, SYNGAP1, DBNL, DLG1, GOPC, APP, ARRB1, BAIAP2, PLD2, FYN, SLC18A2, MYH10, ADD3, SYNJ1, DMXL2, SRGAP2
GO:0045202	synapse	7.18954	0.00172571	DLG3, ITPR1, EGFR, PIAS3, STX6, SYTL4, PSEN1, NAAA, FMR1, PPT1, SH3KBP1, SLC17A7, GLRB, SEPT6, PTPRN2, MAP1B, NSMF, GPER1, AP1S1, STXBP1, RAB8A, SNTB2, PTEN, NIPSNAP1, CPE, FCHSD2, HIP1, RUSC1, SYNGAP1, DBNL, DLG1, GOPC, APP, ARRB1, BAIAP2, PLD2, FYN, MYO7A, SLC18A2, MYH10, ADD3, SYNJ1, DMXL2, SRGAP2
GO:0031513	nonmotile primary cilium	2.45098	0.00292669	PKD2, RAB8A, PTPRK, BBS7, IFT122, PTGS1, GNB5, IFT52, GNB1, TCTN1, MYO7A, TMEM216, ELMOD3, MAP1B, TTC8
GO:0005576	extracellular region	28.5948	0.00435014	ENPP2, CDH6, SMOC2, CORO1B, COL8A1, RAB34, HSPG2, GSTCD, CPQ, TNFSF12, IGF1, GNB4, PPT1, ACAT2, HSD17B11, CD34, CNPY4, MMP28, ALDH1L2, FZD4, C1QTNF1, MLPH, HEATR5B, LASP1, IGFBP3, TCTN1, ATP6AP2, F3, DDR2, CYB5A, F10, RAB8A, ITGBL1, ITM2B, PTGS1, CXCL14, TUFT1, APOL6, MDK, TULP3, RAB7L1, APOE, TP53I3, DKK3, LRRC57, DLL1, PLXDC2, FMOD, TIMP4, CAB39L, CTSO, DMXL2, CBR3, FREM1, MR1, FAM213A, TSPAN6,…
GO:0043005	neuron projection	8.66013	0.00978849	CASP8, PTPN13, PIAS3, FMR1, PPT1, SLC17A7, GLRB, MLPH, FBXO7, GPER1, RAB8A, PTPRK, BLOC1S3, SYNGAP1, DBNL, MAP3K12, APOE, GOPC, ARRB1, IFT52, PLXDC1, NRP2, KCNAB1, SYNJ1, DLG3, STX6, PSEN1, SH3KBP1, ZNF385A, SEPT6, HNMT, PTPRN2, NFIB, DOCK7, MAP1B, AP3S1, NSMF, AP1S1, CNTNAP1, STXBP1, BOC, PTEN, SNCG, DLG1, APP, SNX14, SGCE, GNB1, BAIAP2, TMOD2, SLC18A2, MYH10, SRGAP2
GO:0060076	excitatory synapse	2.94118	0.0198326	RAB8A, DLG3, ITPR1, FMR1, RUSC1, SYNGAP1, DBNL, SLC17A7, GOPC, DLG1, ARRB1, BAIAP2, FYN, ADD3, MAP1B, GPER1, NSMF, SRGAP2
GO:0031226	intrinsic component of plasma membrane	9.47712	0.022156	ENPP2, CDON, TRIP6, TNFSF12, TSPAN12, CALCRL, ATP2A3, CD34, GLRB, C1QTNF1, FZD4, APCDD1, F3, DDR2, GPER1, BCAP31, F10, MRC1, PTPRK, SYNGAP1, RASA1, LTB4R, DCBLD2, DLL1, KCNAB1, MPZL1, PTPRA, PKD2, DLG3, TSPAN6, CD9, PSEN1, PCDHB4, TNFRSF14, PTPRS, ADCY3, HVCN1, PTPRN2, HFE, SGMS1, NPR1, CNTNAP1, BCAM, SLC16A2, BOC, TM9SF2, TCIRG1, ENTPD1, SLC5A3, DLG1, APP, SGCE, SLC24A1, SLCO3A1, AGTR1, SLC18A2,…
GO:0005615	extracellular space	8.66013	0.0224499	ENPP2, SOGA1, CPQ, HSPG2, TNFSF12, IGF1, PPT1, PDGFD, C1QTNF1, FGF2, IGFBP3, PLAT, TCTN1, OGN, F3, IRAK4, SH3BGRL, GUSB, ITM2B, CXCL14, APOE, DKK3, PLXDC1, FMOD, TIMP4, CTSO, DMXL2, CBR3, PCSK5, DLG3, EGFR, IL16, CTSC, CD9, EEF1A1, FRMD4B, C2orf40, ECM2, DPT, VEGFC, HFE, CILP, FBLN5, LRIG3, CPE, PROS1, BMP4, MST1, CPAMD8, APP, CXCL12, CFD, CFI
GO:0098793	presynapse	3.10458	0.0254886	STXBP1, RAB8A, STX6, SYTL4, PSEN1, FMR1, NAAA, HIP1, PPT1, SLC17A7, APP, SEPT6, PLD2, PTPRN2, SLC18A2, SYNJ1, DMXL2, GPER1, AP1S1
GO:0005578	proteinaceous extracellular matrix	3.75817	0.0269325	FBLN5, ADAMTS10, SMOC2, NTN1, COL8A1, HSPG2, BMP4, VIT, ASPN, LAMA3, DLG1, MMP28, MGP, DPT, ECM2, OLFML2B, COL21A1, FMOD, OGN, TIMP4, LTBP1, FREM1, CILP
GO:0099572	postsynaptic specialization	2.77778	0.0293625	RAB8A, DLG3, ITPR1, FMR1, RUSC1, SYNGAP1, DBNL, GOPC, DLG1, ARRB1, BAIAP2, FYN, ADD3, MAP1B, GPER1, NSMF, SRGAP2
GO:0014069	postsynaptic density	2.77778	0.0293625	RAB8A, DLG3, ITPR1, FMR1, RUSC1, SYNGAP1, DBNL, GOPC, DLG1, ARRB1, BAIAP2, FYN, ADD3, MAP1B, GPER1, NSMF, SRGAP2
GO:0030425	dendrite	4.73856	0.0296833	DLG3, PIAS3, PSEN1, FMR1, PPT1, ZNF385A, GLRB, MLPH, MAP1B, NSMF, GPER1, RAB8A, PTEN, PTPRK, DBNL, SYNGAP1, APOE, APP, GOPC, SNX14, ARRB1, IFT52, PLXDC1, SGCE, GNB1, BAIAP2, KCNAB1, MYH10, SRGAP2
GO:0036064	ciliary basal body	2.12418	0.0302423	PKD2, RAB8A, CCDC176, DZIP1, CENPJ, RILPL2, IFT122, BBS7, BBS1, EVC, ALMS1, RP2, TTC8
GO:0005887	integral component of plasma membrane	8.82353	0.0377949	ENPP2, CDON, TRIP6, TNFSF12, TSPAN12, CALCRL, ATP2A3, CD34, GLRB, C1QTNF1, FZD4, APCDD1, DDR2, GPER1, BCAP31, MRC1, PTPRK, LTB4R, DCBLD2, DLL1, KCNAB1, MPZL1, PTPRA, PKD2, DLG3, TSPAN6, CD9, PSEN1, PCDHB4, TNFRSF14, PTPRS, ADCY3, HVCN1, PTPRN2, HFE, SGMS1, NPR1, CNTNAP1, BCAM, SLC16A2, BOC, TM9SF2, TCIRG1, ENTPD1, SLC5A3, DLG1, APP, SGCE, SLC24A1, SLCO3A1, AGTR1, SLC18A2, TSPAN4, SLC22A17
GO:0098794	postsynapse	3.75817	0.0400414	RAB8A, DLG3, PTEN, ITPR1, FMR1, HIP1, RUSC1, SYNGAP1, DBNL, SLC17A7, GOPC, APP, GLRB, DLG1, ARRB1, BAIAP2, MYH10, FYN, ADD3, MAP1B, GPER1, NSMF, SRGAP2
GO:0030424	axon	4.24837	0.0417295	STX6, PSEN1, FMR1, PPT1, SLC17A7, SEPT6, PTPRN2, DOCK7, NFIB, AP3S1, GPER1, AP1S1, STXBP1, CNTNAP1, BOC, PTPRK, SNCG, BLOC1S3, MAP3K12, APP, DLG1, NRP2, KCNAB1, MYH10, SLC18A2, SYNJ1
GO:0098552	side of membrane	4.08497	0.0425102	F10, ZAP70, PKD2, BCAM, PTEN, HEG1, CD9, EEF1A1, SYNGAP1, TNFRSF14, CD34, RASA1, DLG1, ARRB1, CXCL12, ANTXR2, GNB1, MYZAP, KCNAB1, GNG2, ATP6AP2, FYN, HFE, F3, BCAP31
GO:0099503	secretory vesicle	4.08497	0.0430977	STXBP1, RAB8A, ITPR1, CPE, ITPR2, CD9, SYTL4, VPS33B, PROS1, IGF1, PPT1, SLC17A7, APP, SEPT6, BAIAP2, CFD, TMX3, VEGFC, PLAT, PTPRN2, SLC18A2, UNC13D, DENND4C, DMXL2, PCSK5
GO:0016023	cytoplasmic, membrane-bounded vesicle	9.80392	0.043996	RAB34, SYTL4, IGF1, PPT1, SLC17A7, WIPF1, TGOLN2, FZD4, TMX3, PLAT, GPER1, BCAP31, RAB8A, SNTB2, ITM2B, BLOC1S3, HIP1, DBNL, GOPC, RAB7L1, APOE, ARRB1, MYO7A, CCDC88A, UNC13D, DMXL2, PCSK5, GALNT15, ITPR1, EGFR, ITPR2, STX6, CTSC, CD9, SH3KBP1, PDCD6IP, C2orf40, SEPT6, VEGFC, PTPRN2, DENND4C, AP3S1, TBC1D2, AP1S1, STXBP1, LRIG3, TCIRG1, CPE, VPS33B, PROS1, SNX33, RUSC1, APP, BAIAP2, CFD, PLEKHG5,…
GO:0043679	axon terminus	1.63399	0.0441978	STXBP1, SEPT6, STX6, PTPRN2, SLC18A2, FMR1, SYNJ1, GPER1, APP, AP1S1
GO:0033267	axon part	2.61438	0.0492534	STXBP1, CNTNAP1, BOC, STX6, FMR1, BLOC1S3, APP, DLG1, SEPT6, KCNAB1, PTPRN2, SLC18A2, SYNJ1, AP3S1, GPER1, AP1S1
Gene Ontology:- Molecular Function
No enriched terms

[truncated: 47 more sheets: M11, M12, M13, M14, M15, M16, M17, M18, M19, M20, M21, M22, M23, M24, M25, M26, M27, M28, M29, M30 …]
