# Supplementary material for: Network analysis of human muscle adaptation to aging and contraction
Source: Aging (Albany NY). 2020 Jan 7;12(1):740–55. doi: 10.18632/aging.102653 (PMC6977671; doi:10.18632/aging.102653)
Supplement: Supplementary Table 3 [file aging-12-102653-s001..xlsx]

## Sheet: module differential expression
		Age-dependent modules		Contraction 'responsive' modules								Additional age/ mode disparity in contraction responsiveness
		Modules with composite expression sensitive to ageing per-se		Modules with composite expression that is sensitive to contraction								To determine whether, for example, any contraction repsonsive modules may also display greater sensitivity to contraction depending on age (within contraction modes) or mode of contraction (within age)
				In young				In older				In mode				In age
		Young vs. older baseline		post-ECC		post-CON		post-ECC		post-CON		Young post-ECC vs. post-CON		Older post-ECC vs. post-CON		Young vs. Older post-ECC		Young vs. Older post-CON
	Module	LogFC	FDR	LogFC	FDR	LogFC	FDR	LogFC	FDR	LogFC	FDR	LogFC	FDR	LogFC	FDR	LogFC	FDR	LogFC	FDR
	M7	0.271908	0.0234284	-0.226837	0.0371158	-0.125963	0.356742	-0.0532934	0.761373	-0.0712093	0.590579	0.100874	0.479353	-0.0179158	0.936674	0.0983646	0.57075	0.217154	0.0841272
	M8	-0.089102	0.57075	0.298817	0.00401941	0.277225	0.00962335	0.288026	0.00595423	0.218054	0.0245101	-0.0215925	0.932241	-0.0699725	0.633936	-0.078311	0.655365	-0.029931	0.886236
	M9	0.0448986	0.836983	-0.0762423	0.604755	-0.0773634	0.623859	-0.168466	0.157195	-0.285636	0.00406892	-0.00112113	0.998303	-0.11717	0.394183	0.137122	0.394183	0.253172	0.0483473
	M12	-0.00630388	0.993362	0.261579	0.0169455	0.138518	0.310082	0.278915	0.0119368	0.198514	0.0528032	-0.123061	0.392768	-0.0804014	0.598797	-0.0236405	0.934323	-0.0663002	0.734181
	M15	0.148375	0.300825	-0.322553	0.00393108	-0.235299	0.0456725	-0.158937	0.189457	-0.078048	0.57075	0.0872543	0.576397	0.080889	0.596319	-0.0152413	0.968919	-0.00887597	0.990475
	M16	-0.119061	0.437615	0.163325	0.163605	0.151587	0.250181	0.241767	0.0392135	0.126079	0.287481	-0.0117373	0.976928	-0.115688	0.416203	-0.197503	0.163605	-0.0935521	0.591975
	M17	-0.182756	0.160936	0.224596	0.0442779	0.186781	0.120898	0.16566	0.168897	0.0462028	0.795471	-0.0378149	0.843984	-0.119457	0.394183	-0.12382	0.452519	-0.0421781	0.843984
	M18	-0.0724353	0.633936	-0.282305	0.00401941	-0.286329	0.00536876	-0.355769	0.000568797	-0.295715	0.000918133	-0.00402409	0.993689	0.0600537	0.680204	0.00102865	0.998303	-0.0630491	0.713994
	M20	0.248319	0.0465021	-0.0670606	0.670707	-0.0279621	0.892748	0.0772775	0.620767	0.0955182	0.452519	0.0390985	0.843984	0.0182407	0.936674	0.10398	0.570634	0.124838	0.437097
	M21	0.0052479	0.993362	-0.346574	0.000918133	-0.24374	0.0313433	-0.237299	0.0313433	-0.152375	0.135764	0.102835	0.460297	0.0849238	0.568634	-0.104028	0.545022	-0.0861169	0.604755
	M29	-0.173022	0.189457	-0.043633	0.829456	-0.00212053	0.998303	-0.0974372	0.519802	-0.2799	0.00536876	0.0415125	0.841437	-0.182463	0.120898	-0.119218	0.480345	0.104758	0.545022
	M30	-0.0761888	0.677331	-0.0504622	0.802521	-0.050322	0.819643	-0.213009	0.0738658	-0.237345	0.0267889	0.000140122	0.998628	-0.0243365	0.924333	0.0863577	0.655365	0.110834	0.541042
	M35	-0.0670554	0.734181	-0.00508672	0.993362	-0.0427369	0.841437	-0.160051	0.227097	-0.22138	0.0442779	-0.0376502	0.860392	-0.0613295	0.738185	0.0879085	0.655365	0.111588	0.545022
	M36	-0.1364	0.366789	-0.105906	0.438227	-0.0220262	0.934323	-0.0671921	0.683332	-0.253787	0.0119368	0.0838797	0.596319	-0.186595	0.11599	-0.175114	0.238574	0.0953604	0.585949
	M37	-0.130428	0.356888	0.222257	0.0373891	0.225642	0.0442779	0.215936	0.0465021	0.247173	0.00961716	0.00338507	0.995172	0.0312368	0.868992	-0.124108	0.429596	-0.151959	0.279055
	M41	-0.235822	0.0483473	0.0417701	0.829456	0.0610309	0.714034	0.0326273	0.867186	0.0250069	0.886236	0.0192608	0.934323	-0.00762032	0.990475	-0.226679	0.0791288	-0.199798	0.11906
	M42	0.153406	0.257631	0.18281	0.095804	0.135498	0.310082	0.282687	0.00961716	0.190149	0.0574032	-0.0473123	0.819643	-0.0925379	0.535392	0.0535288	0.819643	0.0987545	0.565332
	M43	-0.0365012	0.871692	0.0481979	0.819643	0.000582625	0.998303	0.0538039	0.795471	0.221864	0.0442779	-0.0476152	0.831408	0.16806	0.189457	-0.0421072	0.865317	-0.257782	0.0579124
	M45	0.0909139	0.610763	-0.000816657	0.998303	-0.00145243	0.998303	0.126035	0.395704	0.225032	0.0442779	-0.000635772	0.998303	0.0989969	0.545022	-0.0359375	0.886236	-0.13557	0.429596
	M47	-0.0120934	0.980255	0.160653	0.187549	0.116329	0.437097	0.188931	0.118711	0.237761	0.0245101	-0.0443238	0.836983	0.0488302	0.819643	-0.0403708	0.868828	-0.133525	0.418226
	M49	0.0536557	0.819643	-0.234081	0.0442779	-0.12637	0.394183	-0.076504	0.633936	0.0686613	0.633936	0.107711	0.480345	0.145165	0.284483	-0.103921	0.576397	-0.141376	0.391439
	M52	-0.00155944	0.998303	0.284582	0.00961716	0.197209	0.095804	0.260499	0.0234284	0.100606	0.429596	-0.0873733	0.576397	-0.159893	0.189457	0.022524	0.934323	0.0950437	0.585423
	M54	0.132121	0.394183	0.0463738	0.820124	0.0403543	0.843984	0.192925	0.110433	0.26711	0.00961716	-0.0060195	0.993362	0.0741853	0.654308	-0.01443	0.973734	-0.0946348	0.596319
	M55	0.183928	0.138766	-0.086375	0.545022	-0.0898901	0.553409	-0.121601	0.36127	-0.159235	0.117322	-0.00351509	0.995172	-0.0376341	0.841437	0.219154	0.0938258	0.253273	0.0442779

## Sheet: baseline module-MVC assoc.
		Age-dependent assocociation with basal muscle strength?	Age-independent assocociation with basal muscle strength?
	Module	Age-eigengene interaction P-value	Partial cor. P-value	Partial cor. coef.	Cor. coef.: Young	Cor. coef.: Older
	M1	0.951166	0.136453	-0.455785	-0.505879	-0.293128
	M2	0.503214	0.406069	0.264518	0.384692	0.200319
	M3	0.347761	0.104388	-0.49179	-0.413765	-0.829022
	M4	0.626061	0.333938	0.305672	0.240081	0.522954
	M5	0.279059	0.231079	-0.373981	-0.587383	0.0927422
	M6	0.169171	0.82455	0.0717848	0.4048	-0.550508
	M7	0.649077	0.204054	0.394798	0.319714	0.60414
	M8	0.457679	0.199824	-0.398205	-0.542122	0.0205133
	M9	0.672064	0.761672	-0.0980919	-0.00011617	-0.32788
	M10	0.881881	0.0309081	0.62171	0.572848	0.735707
	M11	0.265057	0.011431	0.698963	0.746834	0.747234
	M12	0.591336	0.0237373	0.644276	0.675511	0.615618
	M13	0.346128	0.661701	0.14115	0.3565	-0.301436
	M14	0.352507	0.0739037	-0.533719	-0.700915	-0.053236
	M15	0.468877	0.836759	0.0667276	-0.0125067	0.47625
	M16	0.0148656	0.604404	-0.166783	-0.767903	0.567917
	M17	0.813986	0.0824546	-0.520929	-0.576965	-0.361934
	M18	0.210789	0.0856012	-0.51645	-0.735771	0.0518344
	M19	0.966836	0.0324027	-0.617494	-0.682068	-0.409127
	M20	0.257504	0.0771511	0.528749	0.448957	0.914644
	M21	0.43	0.0777644	-0.527826	-0.676915	-0.0243721
	M22	0.769238	0.0337289	0.613869	0.562202	0.744533
	M23	0.921933	0.309158	0.320894	0.358773	0.201998
	M24	0.404589	0.279286	-0.340177	-0.152436	-0.773377
	M25	0.944037	0.212433	-0.388175	-0.379343	-0.411998
	M26	0.450891	0.133786	0.458553	0.447384	0.646014
	M27	0.34206	0.028742	0.628087	0.67046	0.685806
	M28	0.246296	0.687884	-0.129693	0.254157	-0.636217
	M29	0.322147	0.237395	-0.36933	-0.549838	0.214935
	M30	0.73792	0.414248	-0.260098	-0.156162	-0.470591
	M31	0.627711	0.574184	0.180665	-0.0123457	0.457477
	M32	0.381872	0.111104	-0.4837	-0.637217	0.167843
	M33	0.0980176	0.760876	-0.0984284	0.440077	-0.711516
	M34	0.749695	0.423755	0.255015	0.216017	0.389159
	M35	0.532096	0.38359	-0.276903	-0.149186	-0.602269
	M36	0.642224	0.506745	-0.212763	-0.307437	-0.0663244
	M37	0.368541	0.438134	-0.24743	-0.348516	0.457715
	M38	0.414701	0.0590587	0.558587	0.561526	0.698096
	M39	0.409632	0.398193	-0.268817	-0.155321	-0.669477
	M40	0.053371	0.375032	0.281716	0.622567	-0.671857
	M41	0.412985	0.0845337	-0.517957	-0.661747	0.17823
	M42	0.696648	0.157248	0.435309	0.387323	0.584202
	M43	0.610474	0.0210296	0.654094	0.703619	0.563126
	M44	0.00955486	0.958302	0.0169505	0.72934	-0.759042
	M45	0.667696	0.0701153	0.539712	0.447769	0.759702
	M46	0.994837	0.447076	0.242775	0.159878	0.379763
	M47	0.989276	0.0159711	0.675242	0.67844	0.667036
	M48	0.809593	0.0337798	0.613732	0.580434	0.702351
	M49	0.910779	0.591515	-0.17267	-0.154315	-0.224116
	M50	0.0435693	0.363672	-0.288193	-0.688638	0.566399
	M51	0.789082	0.392677	-0.271853	-0.244636	-0.370622
	M52	0.640623	0.800694	-0.0817111	-0.206161	0.0661231
	M53	0.741271	0.246986	-0.362406	-0.402329	-0.304345
	M54	0.875573	0.280978	0.339054	0.287821	0.45392
	M55	0.150663	0.234278	0.371616	0.582661	-0.531854
	M56	0.248766	0.206391	-0.392934	-0.592297	0.295091

## Sheet: post-ex module-MVC assoc.
				Absoloute post-exercise		Change from baseline
	Module	Contraction 'responsive' pattern	Corresponding association test	Cor. coef.	P-value	Cor. coef.	P-value
	M7	↓ post-ECC in younger muscle	Pearson's correlation between post-ECC eigengene expression paterns and post-ECC MVC changes for younger muscle only	0.213089	0.685204	0.145716	0.782972
	M8	↑ post-ECC and -CON in both younger and older muscle	Repeated measures corelation between post-exercise eigengene expression patterns and post-exercise MVC changes across ages and contraction modes	0.398573	0.224677	0.398573	0.224677
	M9	↓ post-CON in older muscle	Pearson's correlation between post-CON eigengene expression paterns and post-CON MVC changes for older muscle only	-0.0996184	0.83172	0.0374312	0.936499
	M12	↑ post-ECC in both younger and older muscle	Pearson's corelation between post-ECC eigengene expression patterns and post-ECC MVC changes across ages	0.638845	0.0343567	0.521002	0.100309
	M15	↓ post-ECC and post-CON in younger muscle	Repeated measures corelation between post-exercise eigengene expression patterns and post-exercise MVC changes across contraction modes for younger muscle only	-0.529564	0.279909	-0.529564	0.279909
	M16	↑ post-ECC in older muscle	Pearson's correlation between post-ECC eigengene expression paterns and post-ECC MVC changes for older muscle only	-0.259401	0.673462	-0.421285	0.479922
	M17	↑ post-ECC in younger muscle	Pearson's correlation between post-ECC eigengene expression paterns and post-ECC MVC changes for younger muscle only	-0.193513	0.713354	0.0901084	0.865203
	M18	↓ post-ECC and -CON in both younger and older muscle	Repeated measures corelation between post-exercise eigengene expression patterns and post-exercise MVC changes across ages and contraction modes	-0.629888	0.0377971	-0.629888	0.0377971
	M21	↓ post-ECC and -CON in younger muscle and post-ECC in older muscle	Repeated measures corelation between post-exercise eigengene expression patterns and post-exercise MVC changes across ECC for both ages and CON for younger muscle	-0.676154	0.140332	-0.676154	0.140332
	M29	↓ post-CON in older muscle	Pearson's correlation between post-CON eigengene expression paterns and post-CON MVC changes for older muscle only	-0.253405	0.583484	-0.449198	0.311966
	M30	↓ post-CON in older muscle	Pearson's correlation between post-CON eigengene expression paterns and post-CON MVC changes for older muscle only	-0.395778	0.379468	-0.0357372	0.939369
	M35	↓ post-CON in older muscle	Pearson's correlation between post-CON eigengene expression paterns and post-CON MVC changes for older muscle only	0.294602	0.521286	0.244716	0.596884
	M36	↓ post-CON in older muscle	Pearson's correlation between post-CON eigengene expression paterns and post-CON MVC changes for older muscle only	-0.366049	0.419358	-0.205918	0.657787
	M37	↑ post-ECC and -CON in both younger and older muscle	Repeated measures corelation between post-exercise eigengene expression patterns and post-exercise MVC changes across ages and contraction modes	0.111621	0.743866	0.111621	0.743866
	M42	↑ post-ECC in older muscle	Pearson's correlation between post-ECC eigengene expression paterns and post-ECC MVC changes for older muscle only	0.627893	0.256726	0.503736	0.386888
	M43	↑ post-CON in older muscle	Pearson's correlation between post-CON eigengene expression paterns and post-CON MVC changes for older muscle only	-0.0376669	0.9361	-0.0058047	0.990146
	M45	↑ post-CON in older muscle	Pearson's correlation between post-CON eigengene expression paterns and post-CON MVC changes for older muscle only	0.0204064	0.965364	-0.0488962	0.91709
	M47	↑ post-CON in older muscle	Pearson's correlation between post-CON eigengene expression paterns and post-CON MVC changes for older muscle only	0.130561	0.780237	0.0175309	0.970243
	M49	↓ post-ECC in younger muscle	Pearson's correlation between post-ECC eigengene expression paterns and post-ECC MVC changes for younger muscle only	-0.0537794	0.919409	-0.34836	0.498598
	M52	↑ post-ECC in both younger and older muscle	Pearson's corelation between post-ECC eigengene expression patterns and post-ECC MVC changes across ages	0.12085	0.723379	0.0735224	0.8299
	M54	↑ post-CON in older muscle	Pearson's correlation between post-CON eigengene expression paterns and post-CON MVC changes for older muscle only	0.240628	0.60322	0.0126775	0.97848
