# Supplementary material for: Network analysis of human muscle adaptation to aging and contraction
Source: Aging (Albany NY). 2020 Jan 7;12(1):740–55. doi: 10.18632/aging.102653 (PMC6977671; doi:10.18632/aging.102653)
Supplement: Supplementary Table 4 [file aging-12-102653-s002..xlsx]

## Sheet: M7
	Expression profile pattern:		↓ in older vs. younger muscle at baseline; ↓ post-ECC in younger muscle
	Relationship to muscle strength:		-
	Hub gene and gene significance analysis (where applicable)				TFBS enrichment analysis
	Hub genes		Gene Significance		Overrepresented TFBS
	Modules genes with kIM ≥ 0.7		N/A		TFBS with a Z-score ≳ 13.969 and Fisher score ≳ 2.263
	Gene	kIM	GS	Ranked in upper quartile of module genes?	TFBS	Z-score	Fisher score
	TMEM88	1			NF-kappaB	21.73	2.695
	BST2	0.964315			NFKB1	15.13	2.471
	CA4	0.906068			PPARG::RXRA	20.588	2.98
	TCF15	0.872664			REL	19.02	2.269
	GPIHBP1	0.865923			RELA	19.717	4.306
	PCDH12	0.78562
	KANK3	0.756983

## Sheet: M8
	Expression profile pattern:		↑ post-ECC and -CON in both younger and older muscle
	Relationship to muscle strength:		-
	Hub gene and gene significance analysis (where applicable)				TFBS enrichment analysis
	Hub genes		Gene Significance		Overrepresented TFBS
	Modules genes with kIM ≥ 0.7		N/A		TFBS with a Z-score ≳ 8.044 and Fisher score ≳ 4.581
	Gene	kIM	GS	Ranked in upper quartile of module genes?	TFBS	Z-score	Fisher score
	FLNC	1			E2F1	8.419	6.435
	SPEN	0.945586			MAX	8.398	5.617
	HNRNPU	0.872434
	CLIP1	0.847093
	ALPK3	0.827658
	DYRK1A	0.806589
	ANKRD17	0.779647
	AUTS2	0.705762

## Sheet: M9
	Expression profile pattern:		↓ post-CON in older muscle; ↓ older muscle vs. younger muscle post-CON
	Relationship to muscle strength:		-
	Hub gene and gene significance analysis (where applicable)				TFBS enrichment analysis
	Hub genes		Gene Significance		Overrepresented TFBS
	Modules genes with kIM ≥ 0.7		N/A		TFBS with a Z-score ≳ 5.858 and Fisher score ≳ 0.457
	Gene	kIM	GS	Ranked in upper quartile of module genes?	TFBS	Z-score	Fisher score
	UQCRC2	1			Esrrb	11.97	0.806
	SDHB	0.984816			RORA_1	9.085	0.592
	ATP5A1	0.960228
	COX4I1	0.938806
	COX8A	0.936279
	NDUFS3	0.92656
	UQCRFS1	0.926532
	NDUFA9	0.910884
	NDUFS8	0.90991
	SUCLG1	0.898461
	COQ9	0.897388
	CYC1	0.895918
	SLC25A4	0.890513
	ATP5G3	0.871015
	NDUFA8	0.865352
	NDUFAB1	0.861849
	ATP5F1	0.836215
	COX5A	0.833682
	VDAC3	0.829086
	NDUFB10	0.828234
	GHITM	0.819939
	CHCHD3	0.817683
	ATP5G1	0.794922
	ATP5B	0.763525
	DLD	0.763271
	FH	0.7591
	PDHB	0.753943
	SDHC	0.74665
	NDUFC1	0.733577
	NDUFS6	0.732087
	EIF3K	0.724062
	PHB	0.711027
	MRPS7	0.704476
	NDUFS2	0.702469
	GOT2	0.702217

## Sheet: M10
	Expression profile pattern:		-
	Relationship to muscle strength:		Positive association with MVC at baseline, irrespective of age
	Hub gene and gene significance analysis (where applicable)				TFBS enrichment analysis
	Hub genes		Gene Significance		Overrepresented TFBS
	Modules genes with kIM ≥ 0.7		To MVC at baseline		TFBS with a Z-score ≳ 19.655 and Fisher score ≳ 4.652
			(irrespective of age)
	Gene	kIM	GS	Ranked in upper quartile of module genes?	TFBS	Z-score	Fisher score
	PLSCR4	1	0.520259	N	ELF5	19.778	5.419
	FYN	0.969304	0.645824	Y	Nobox	22.923	6.299
	LAMA3	0.963727	0.720073	Y
	NOVA1	0.956015	0.667636	Y
	SH3BGRL	0.947972	0.570368	Y
	HNMT	0.944297	0.466911	N
	PTPRA	0.925075	0.639729	Y
	CD34	0.907752	0.493316	N
	ADD3	0.895789	0.494459	N
	TRAM1	0.876102	0.494226	N
	AIM1	0.875221	0.647693	Y
	DDR2	0.859477	0.575132	Y
	HSD17B11	0.856932	0.674484	Y
	CCND2	0.83286	0.632326	Y
	ANKRD29	0.787632	0.505408	N
	MPZL1	0.778831	0.374467	N
	SEPT8	0.762024	0.545936	N
	LHFP	0.756474	0.501535	N
	NLRP1	0.752017	0.252973	N
	DOCK1	0.742862	0.467836	N
	EBF1	0.739154	0.504693	N
	GNG2	0.739129	0.564561	Y
	PKD2	0.735823	0.71679	Y
	PLEKHH2	0.73177	0.45799	N

## Sheet: M11
	Expression profile pattern:		-
	Relationship to muscle strength:		Positive association with MVC at baseline, irrespective of age
	Hub gene and gene significance analysis (where applicable)				TFBS enrichment analysis
	Hub genes		Gene Significance		Overrepresented TFBS
	Modules genes with kIM ≥ 0.7		To MVC at baseline		TFBS with a Z-score ≳ 9.815 and Fisher score ≳ 4.456
			(irrespective of age)
	Gene	kIM	GS	Ranked in upper quartile of module genes?	TFBS	Z-score	Fisher score
	TIMP2	1	0.606838	N	CEBPA	10.219	4.491
	DCN	0.840225	0.65319	N	Hand1::Tcfe2a	12.239	4.907
	ITGA11	0.782207	0.672292	N
	MFAP4	0.743242	0.474442	N
	SCARA5	0.736519	0.746943	Y
	LPAR1	0.717778	0.425256	N

## Sheet: M12
	Expression profile pattern:		↑ post-ECC in both younger and older muscle
	Relationship to muscle strength:		Positive association with MVC at baseline, irrespective of age; positively correlated with post-ECC MVC declines
	Hub gene and gene significance analysis (where applicable)								TFBS enrichment analysis
	Hub genes		Gene Significance						Overrepresented TFBS
	Modules genes with kIM ≥ 0.7		To MVC at baseline		To post-ECC strength declines (across age)				TFBS with a Z-score ≳ 14.674 and Fisher score ≳ 3.997
			(irrespective of age)		Absoloute post-exercise expression		Change in expression from baseline
	Gene	kIM	GS	Ranked in upper quartile of module genes?	GS	Ranked in upper quartile of module genes?	GS	Ranked in upper quartile of module genes?	TFBS	Z-score	Fisher score
	ANXA2P2	1	0.616757	Y	0.552802	N	0.388681	N	Klf4	24.671	4.482
	ANXA2	0.915937	0.706889	Y	0.606484	Y	0.480764	Y	RELA	14.951	6.96
	ANXA2P1	0.880866	0.639372	Y	0.649806	Y	0.496634	Y
	MSN	0.719549	0.550221	N	0.567439	N	0.292436	N
	ANXA2P3	0.715406	0.753961	Y	0.714737	Y	0.631674	Y
	CD44	0.71296	0.530613	N	0.472748	N	0.345176	N

## Sheet: M15
	Expression profile pattern:		↓ post-ECC and post-CON in younger muscle
	Relationship to muscle strength:		-
	Hub gene and gene significance analysis (where applicable)				TFBS enrichment analysis
	Hub genes		Gene Significance		Overrepresented TFBS
	Modules genes with kIM ≥ 0.7		N/A		TFBS with a Z-score ≳ 15.964 and Fisher score ≳ 3.301
	Gene	kIM	GS	Ranked in upper quartile of module genes?	TFBS	Z-score	Fisher score
	ZSCAN26	1			FOXA1	16.583	5.413
	ZNF519	0.959119			FOXI1	20.458	4.883
	SLC46A3	0.91644			Foxd3	23.188	4.518
	KBTBD3	0.909695			Foxq1	19.646	4.843
	PEX1	0.807367			Pax4	16.042	4.235
	MBTD1	0.794509			Pdx1	17.869	3.791
	MGME1	0.785295			SRY	20.824	4.997
	CUL4B	0.780146			Sox5	16.265	4.353
	MKL2	0.7736			TBP	16.68	3.309
	CMTR2	0.765542
	ZNF133	0.758162
	PIKFYVE	0.754433
	KLHL28	0.700556

## Sheet: M16
	Expression profile pattern:		↑ post-ECC in older muscle
	Relationship to muscle strength:		Age-dependent association with MVC at baseline (positive in older muscle, negative in younger muscle)
	Hub gene and gene significance analysis (where applicable)						TFBS enrichment analysis
	Hub genes		Gene Significance				Overrepresented TFBS
	Modules genes with kIM ≥ 0.7		To MVC at baseline (dependent on age)				TFBS with a Z-score ≳ 10.573 and Fisher score ≳ 10.131
			Younger muscle		Older muscle
	Gene	kIM	GS	Ranked in upper quartile of module genes?	GS	Ranked in upper quartile of module genes?	TFBS	Z-score	Fisher score
	PRRC2C	1	0.52696	N	0.516704	N	Foxq1	11.628	11.86
	NUP98	0.833363	0.680844	N	0.279128	N	TBP	13.607	13.032
	PTPN14	0.798879	0.666405	N	0.297692	N
	JMY	0.703254	0.874506	Y	0.396251	N

## Sheet: M17
	Expression profile pattern:		↑ post-ECC in younger muscle
	Relationship to muscle strength:		-
	Hub gene and gene significance analysis (where applicable)				TFBS enrichment analysis
	Hub genes		Gene Significance		Overrepresented TFBS
	Modules genes with kIM ≥ 0.7		N/A		TFBS with a Z-score ≳ 6.445 and Fisher score ≳ 3.540
	Gene	kIM	GS	Ranked in upper quartile of module genes?	TFBS	Z-score	Fisher score
	SYNPO2	1			Egr1	8.834	4.871
	BRD4	0.808622			Klf4	8.765	5.301
	EIF3A	0.808214			NFYA	7.558	5.368
	CDV3	0.806919			RXRA::VDR	6.903	3.764
	ANKRD23	0.776731			SP1	7.235	3.587
	USP7	0.746712			Zfx	14.832	5.01
	OTUD7B	0.74327

## Sheet: M18
	Expression profile pattern:		↓ post-ECC and -CON in both younger and older muscle
	Relationship to muscle strength:		Negatively correlated with post-contraction (i.e. post-ECC and -CON) MVC declines
	Hub gene and gene significance analysis (where applicable)						TFBS enrichment analysis
	Hub genes		Gene Significance				Overrepresented TFBS
	Modules genes with kIM ≥ 0.7		To post-contraction strength declines (across age)				TFBS with a Z-score ≳ 10.259 and Fisher score ≳ 9.041
			Absoloute post-exercise expression		Change in expression from baseline
	Gene	kIM	GS	Ranked in upper quartile of module genes?	GS	Ranked in upper quartile of module genes?	TFBS	Z-score	Fisher score
	NR1D2	1	0.28257	N	0.28257	N	FOXA1	13.13	10.687
	PER1	0.825489	0.0173252	N	0.0173252	N	Foxa2	12.244	15.221
	C1orf51	0.816399	0.267572	N	0.267572	N	SRY	11.432	10.342
	TEF	0.769149	0.240964	N	0.240964	N
	PRKCQ	0.766878	0.477205	N	0.477205	N

[truncated: 23 more sheets: M19, M20, M21, M22, M27, M29, M30, M35, M36, M37, M40, M41, M42, M43, M44, M45, M47, M48, M49, M50 …]
